# Supplementary material for: RNA-Seq Profiling Reveals Novel Hepatic Gene Expression Pattern in Aflatoxin B1 Treated Rats
Source: PLoS One. 2013 Apr 22;8(4):e61768. doi: 10.1371/journal.pone.0061768 (PMC3632591; doi:10.1371/journal.pone.0061768)
Supplement: Table S1 — DEGs found by DESeq, Microarray, Cuffdiff analysis. (XLSX) [file pone.0061768.s011.xlsx]

## Sheet: Table S-1
#transcriptID	chrom	strand	txStart	txEnd	cdsStart	cdsEnd	exon_count	exonStarts	exonEnds	gene	deseq_foldChange	deseq_pval	Microarray FoldChange	Microarray Nominal.Pvalue	cuffdiff_fold	p_value	deseq_DEG	microarray_DEG	cuffdiff_DEG	deseq+microarray+cuffdiff_DEG	deseq_only	microarray_only	cuffdiff_only	deseq_microarray_NO_cuffdiff_DEG	deseq_cuffdiff_NO_microarray	cuffdiff_microarray_NO_deseq
ctrlafb_g1_1.3.0_00000825	chr1	+	164953061	164978785	164953061	164978785	3	164953061,164956801,164975160,	164953499,164957089,164978785,	Olfml1	1.74947	0.0109957	2.54711	0.0015984	1.79651	0.105234	0	1	0	0	0	1	0	0	0	0
ctrlafb_g1_1.3.0_00001052	chr1	+	200918534	200928919	200918534	200928919	9	200918534,200919476,200923087,200923542,200924029,200924994,200927011,200927696,200928605,	200918711,200919635,200923236,200923702,200924205,200925135,200927198,200927837,200928919,	Cyp2e1	1.7827	2.16e-07	2.42059	0.00141443	1.6397	1	0	1	0	0	0	1	0	0	0	0
ctrlafb_g1_1.3.0_00001315	chr1	+	219906120	219984298	219906120	219984298	6	219906120,219972070,219975048,219977543,219980487,219981880,	219906305,219972224,219975176,219977672,219980640,219984298,	Gna14	1.81318	0.00241704	2.31906	0.00437898	1.98269	1	0	1	0	0	0	1	0	0	0	0
ctrlafb_g1_1.3.0_00001813	chr1	-	76249869	76254942	76249869	76254942	6	76249869,76252310,76252494,76252750,76252922,76254830,	76250201,76252408,76252568,76252803,76252946,76254942,	Sepw1	1.91568	1.74e-05	2.52194	0.00121261	1.92181	0.064664	0	1	0	0	0	1	0	0	0	0
ctrlafb_g1_1.3.0_00002042	chr1	-	90568189	90577426	90568189	90577426	12	90568189,90569194,90569449,90569667,90569918,90570618,90572446,90572696,90576255,90576559,90576750,90577281,	90568835,90569351,90569560,90569801,90570013,90570764,90572581,90572844,90576323,90576646,90576795,90577426,	Ccne1	2.12125	0.00579667	2.51036	0.00185071	2.28683	0.123163	0	1	0	0	0	1	0	0	0	0
ctrlafb_g1_1.3.0_00002693	chr1	-	205018529	205166049	205018529	205166049	26	205018529,205023039,205027340,205029019,205034680,205039057,205039946,205043188,205043687,205043942,205047094,205050894,205053604,205065265,205068665,205069970,205074997,205078150,205078700,205080571,205084259,205085698,205087113,205099498,205108819,205165864,	205020267,205023144,205027524,205029071,205034832,205039202,205040046,205043245,205043798,205044143,205047168,205050965,205053698,205065425,205068799,205070034,205075038,205078205,205078765,205080622,205084313,205085849,205087211,205099830,205108964,205166049,	Ano1	1.84085	0.0042781	2.25799	0.00140732	-1.40485e-05	0.499596	0	1	0	0	0	1	0	0	0	0
ctrlafb_g1_1.3.0_00002720	chr1	-	206645199	206648212	206645199	206648212	6	206645199,206645831,206646799,206647004,206647519,206648064,	206645444,206645934,206646886,206647110,206647554,206648212,	RGD1307603	-1.82377	0.016917	-2.11306	0.00198452	-1.57445	0.126401	0	1	0	0	0	1	0	0	0	0
ctrlafb_g1_1.3.0_00007836	chr10	+	1492181	1527197	1492181	1527197	18	1492181,1493593,1495269,1501024,1501206,1501814,1502728,1504070,1505118,1508436,1510203,1511476,1517330,1519442,1521885,1523205,1524198,1525605,	1492269,1493698,1495325,1501113,1501335,1501873,1502791,1504139,1505216,1508528,1510341,1511606,1517475,1519626,1521993,1523357,1524285,1527197,	Rrn3	1.2462	0.0562792	2.22619	0.00394711	-1.07531	1	0	1	0	0	0	1	0	0	0	0
ctrlafb_g1_1.3.0_00008209	chr10	+	55825860	55828184	55825860	55828184	5	55825860,55826255,55826405,55827339,55827631,	55826077,55826322,55826505,55827435,55828184,	Tmem107	1.81993	0.514919	2.46813	0.00121065	1.65817	0.637785	0	1	0	0	0	1	0	0	0	0
ctrlafb_g1_1.3.0_00008275	chr10	+	57536965	57542317	57536965	57542317	12	57536965,57537630,57537951,57538174,57538379,57538847,57540454,57540793,57541186,57541762,57542013,57542169,	57537013,57537716,57538046,57538232,57538448,57538980,57540676,57540990,57541387,57541870,57542071,57542317,	Eno3	1.09967	0.647202	-2.16501	0.0028028	1.23941	0.736442	0	1	0	0	0	1	0	0	0	0
ctrlafb_g1_1.3.0_00008348	chr10	+	63971446	64021007	63971446	64021007	17	63971446,63995032,63996290,64004800,64010174,64014730,64014975,64015889,64016305,64016554,64017354,64018567,64018840,64019256,64019534,64019737,64019996,	63971517,63995694,63996423,64004995,64010359,64014898,64015141,64016083,64016443,64016750,64017548,64018758,64019037,64019294,64019651,64019839,64021007,	Sez6	-1.64781	1.01e-05	-2.13263	0.00382448	-1.75052	1	0	1	0	0	0	1	0	0	0	0
ctrlafb_g1_1.3.0_00008559	chr10	+	87684493	87697865	87684493	87697865	12	87684493,87684970,87686594,87686981,87688025,87688803,87690516,87691205,87693088,87695611,87696585,87696976,	87684665,87685163,87686875,87687180,87688200,87688909,87690655,87691305,87693152,87695813,87696725,87697865,	Cdc6	2.70882	0.0107047	2.57561	0.00319297	1.30719	0.999978	0	1	0	0	0	1	0	0	0	0
ctrlafb_g1_1.3.0_00015357	chr12	-	4282952	4323693	4282952	4323693	27	4282952,4284616,4285392,4291274,4291506,4291896,4293709,4294891,4295111,4296354,4297957,4298657,4300178,4302207,4303137,4305345,4306790,4313105,4314815,4315645,4317212,4317503,4317835,4318389,4320106,4323357,4323533,	4283676,4284774,4285633,4291412,4291669,4292088,4293830,4295035,4295266,4296708,4298127,4298844,4300359,4302535,4303206,4305440,4311661,4314199,4314926,4315694,4317317,4317543,4317884,4318497,4320333,4323440,4323693,	Brca2	1.49539	0.0349014	2.20971	0.000797925	0	1	0	1	0	0	0	1	0	0	0	0
ctrlafb_g1_1.3.0_00017104	chr13	+	44453797	44469514	44453797	44469514	3	44453797,44455977,44469419,	44453948,44456054,44469514,	Fam72a	2.21006	0.18326	3.1337	0.00280842	2.63482	0.485315	0	1	0	0	0	1	0	0	0	0
ctrlafb_g1_1.3.0_00017119	chr13	+	45187911	45195996	45187911	45195996	5	45187911,45192000,45192421,45193234,45194292,	45188921,45192164,45192636,45193335,45195996,	Klhdc8a	-1.57813	0.0165593	-2.27731	0.000591833	1.1903	1	0	1	0	0	0	1	0	0	0	0
ctrlafb_g1_1.3.0_00017164	chr13	+	48750202	48775815	48750202	48775815	6	48750202,48762867,48769273,48770801,48774196,48774680,	48750239,48762979,48769441,48770930,48774289,48775815,	Csrp1	-1.71783	5.27e-05	-2.21218	0.000795862	-1.69447	0.00926277	0	1	0	0	0	1	0	0	0	0
ctrlafb_g1_1.3.0_00017523	chr13	-	48070488	48090682	48070488	48090682	35	48070488,48070902,48071268,48071538,48071789,48072080,48072246,48072403,48072640,48073007,48073260,48073940,48074610,48075435,48075618,48075864,48077901,48078035,48079819,48080354,48080815,48081245,48081830,48082267,48083867,48085083,48085492,48085841,48086782,48087244,48087680,48088114,48088532,48090148,48090550,	48070680,48071037,48071431,48071657,48071917,48072156,48072324,48072490,48072707,48073142,48073420,48074062,48074744,48075511,48075708,48075957,48077948,48078161,48079886,48080564,48080955,48081526,48082096,48082530,48084139,48085358,48085737,48086095,48087045,48087513,48087952,48088162,48088599,48090207,48090682,	Ptprv	8.11734	0.00933142	2.00018	0.000805639	2.97209	0.364758	0	1	0	0	0	1	0	0	0	0
ctrlafb_g1_1.3.0_00017606	chr13	-	71849603	71874034	71849603	71874034	6	71849603,71850963,71865558,71867727,71873232,71873779,	71850471,71851087,71865736,71867992,71873345,71874034,	Tor3a	-1.56565	0.0413893	-2.63577	0.000797289	-1.47969	1	0	1	0	0	0	1	0	0	0	0
ctrlafb_g1_1.3.0_00017656	chr13	-	79103916	79120536	79103916	79120536	5	79103916,79110108,79112287,79114875,79120399,	79105644,79110248,79112388,79115232,79120536,	Gorab	1.61372	0.0143024	2.53695	0.0013747	1.76172	0.187798	0	1	0	0	0	1	0	0	0	0
ctrlafb_g1_1.3.0_00017840	chr13	-	111021649	111025811	111021649	111025811	2	111021649,111025626,	111021835,111025811,	Cr1l	1.33777	0.0594808	2.37299	0.00140675	0	1	0	1	0	0	0	1	0	0	0	0
ctrlafb_g1_1.3.0_00019009	chr14	+	22499152	22522842	22499152	22522842	7	22499152,22499706,22501406,22510103,22511836,22512580,22522238,	22499695,22499893,22501554,22510234,22511923,22512799,22522842,	Ugt2b7	5.87	0.00651477	8.8627	0.000202184	4.46237	0.152329	0	1	0	0	0	1	0	0	0	0
ctrlafb_g1_1.3.0_00019132	chr14	+	79553600	79578877	79553600	79578877	19	79553600,79554404,79556202,79559755,79561684,79563418,79564378,79566729,79567695,79569179,79569789,79570775,79571340,79571856,79572051,79574911,79576205,79577629,79578725,	79553739,79554550,79556307,79559927,79561799,79563595,79564576,79566919,79567836,79569312,79570063,79570966,79571592,79571966,79572267,79575027,79576317,79577747,79578877,	Man2b2	1.58316	5.86e-05	2.0059	0.0024	1.79268	1	0	1	0	0	0	1	0	0	0	0
ctrlafb_g1_1.3.0_00019669	chr14	-	92685445	92693967	92685445	92693967	3	92685445,92691333,92693919,	92688169,92691448,92693967,	Fignl1	1.626	0.104429	3.74134	0.00236733	0	1	0	1	0	0	0	1	0	0	0	0
ctrlafb_g1_1.3.0_00021253	chr15	+	83103177	83118363	83103177	83118363	4	83103177,83105803,83107753,83116591,	83103710,83106667,83107812,83118363,	Klf5	3.12061	0.0967988	5.61179	0.00335571	4.1496	0.136326	0	1	0	0	0	1	0	0	0	0
ctrlafb_g1_1.3.0_00021464	chr15	-	35173372	35176000	35173372	35176000	5	35173372,35174212,35174687,35175281,35175938,	35173629,35174472,35174822,35175431,35176000,	Gzmc	-6.09467	0.470335	-3.74419	0.000401445	-1.23525	0.893837	0	1	0	0	0	1	0	0	0	0
ctrlafb_g1_1.3.0_00021535	chr15	-	44822636	44835637	44822636	44835637	3	44822636,44826119,44835488,	44822993,44826582,44835637,	Pnoc	3.38951	0.05968	4.87494	0.0031968	3.41555	0.234517	0	1	0	0	0	1	0	0	0	0
ctrlafb_g1_1.3.0_00022890	chr16	+	19310875	19315282	19310875	19315282	2	19310875,19312834,	19311161,19315282,	Gdf15	1.36293	0.0371525	3.12241	0.000399441	1.63601	1	0	1	0	0	0	1	0	0	0	0
ctrlafb_g1_1.3.0_00023017	chr16	+	69182536	69188087	69182536	69188087	7	69182536,69184473,69185042,69187002,69187295,69187486,69187865,	69182719,69184654,69185153,69187168,69187354,69187628,69188087,	Got1l1	8.494	0.268969	4.88805	0.00222988	-1.04867	0.980057	0	1	0	0	0	1	0	0	0	0
ctrlafb_g1_1.3.0_00023419	chr16	-	74980054	74995445	74980054	74995445	2	74980054,74995319,	74980323,74995445,	Defb1	4.84835	0.0056226	21.619	0.000596421	13.5044	0.0514295	0	1	0	0	0	1	0	0	0	0
ctrlafb_g1_1.3.0_00024913	chr17	+	71070617	71218463	71070617	71218463	2	71070617,71214906,	71070637,71218463,	Chrm3	3.63077	0.0529277	3.09757	0.000589391	3.66472	0.219075	0	1	0	0	0	1	0	0	0	0
ctrlafb_g1_1.3.0_00025127	chr17	-	23481996	23615491	23481996	23615491	8	23481996,23487207,23491091,23493134,23500991,23511071,23525178,23615289,	23485834,23487296,23491235,23493332,23501051,23511175,23525368,23615491,	Rnf144b	-1.27662	0.0571722	-2.83502	0.00301811	1.68751	1	0	1	0	0	0	1	0	0	0	0
ctrlafb_g1_1.3.0_00028140	chr19	+	35336342	35341585	35336342	35341585	5	35336342,35339734,35340062,35340355,35340650,	35336731,35339946,35340247,35340492,35341585,	Hsd11b2	-1.7678	0.00138319	-3.08191	0.0030248	-1.62503	1	0	1	0	0	0	1	0	0	0	0
ctrlafb_g1_1.3.0_00029850	chr2	+	35101019	35134399	35101019	35134399	11	35101019,35104539,35111346,35113725,35114534,35115827,35119050,35129562,35130140,35131497,35132740,	35101188,35104701,35111467,35114003,35114716,35116043,35119184,35129691,35130250,35131621,35134399,	Trim23	1.10785	0.434396	4.16202	0.004239	1.16794	1	0	1	0	0	0	1	0	0	0	0
ctrlafb_g1_1.3.0_00030008	chr2	+	105202487	105262107	105202487	105262107	24	105202487,105203880,105208662,105209419,105210298,105212352,105214277,105217841,105220061,105221248,105229964,105230139,105233789,105238252,105240195,105244020,105245692,105251016,105251815,105253445,105253945,105254466,105255989,105260268,	105202681,105204087,105208828,105209552,105210395,105212426,105214468,105217936,105220127,105221335,105230043,105230183,105233886,105238395,105240333,105244155,105245871,105251140,105251993,105253570,105254057,105254646,105256069,105262107,	Hltf	1.94835	2.35e-07	2.27394	0.000595711	15.7448	1	0	1	0	0	0	1	0	0	0	0
ctrlafb_g1_1.3.0_00030020	chr2	+	116168790	116170724	116168790	116170724	4	116168790,116169862,116170095,116170492,	116168905,116169954,116170216,116170724,	Rpl22l1	-1.06039	0.81758	-2.84242	0.00119928	0	1	0	1	0	0	0	1	0	0	0	0
ctrlafb_g1_1.3.0_00030054	chr2	+	123051592	123062494	123051592	123062494	12	123051592,123051977,123052716,123052951,123053644,123054834,123055975,123058188,123059170,123059815,123061947,123062152,	123051702,123052071,123052835,123053053,123053781,123054916,123056107,123058276,123059316,123059996,123062025,123062494,	Exosc9	1.09903	0.46859	2.8508	0.0020024	1.31482	1	0	1	0	0	0	1	0	0	0	0
ctrlafb_g1_1.3.0_00030147	chr2	+	158987318	159015705	158987318	159015705	24	158987318,158988553,158989669,158990435,158991969,158998408,158998949,159000374,159001122,159003052,159004173,159005883,159007266,159008899,159009219,159009857,159010911,159011601,159012481,159012836,159013654,159013935,159014741,159015492,	158987631,158988690,158989847,158990626,158992145,158998572,158999076,159000514,159001272,159003216,159004406,159006068,159007427,159009124,159009298,159010009,159011037,159011790,159012625,159013009,159013836,159014167,159014924,159015705,	Smc4	1.57377	0.000107976	2.45253	0.00139359	1.58107	1	0	1	0	0	0	1	0	0	0	0
ctrlafb_g1_1.3.0_00030193	chr2	+	180029801	180034147	180029801	180034147	4	180029801,180033015,180033386,180033847,	180029972,180033196,180033502,180034147,	Crabp2	1.03382	1	-2.10253	0.00355661	-1.08839	0.9595	0	1	0	0	0	1	0	0	0	0
ctrlafb_g1_1.3.0_00030453	chr2	+	204982222	205326505	204982222	205326505	27	204982222,205062703,205135879,205138054,205142811,205144790,205147840,205149841,205152087,205156552,205160399,205162134,205166498,205168025,205168803,205212547,205212900,205223958,205228492,205271013,205288060,205292686,205298632,205299298,205305306,205323613,205324366,	204982425,205062819,205135937,205138119,205142919,205144882,205147908,205149944,205152186,205156647,205160467,205162220,205166583,205168157,205168912,205212648,205213000,205223983,205228537,205271149,205288125,205292720,205298748,205299385,205305435,205323764,205326505,	Vav3	1.45722	0.0497171	2.31633	0.00485339	2.33154	0.149976	0	1	0	0	0	1	0	0	0	0
ctrlafb_g1_1.3.0_00030557	chr2	+	240842936	240857331	240842936	240857331	4	240842936,240849386,240849929,240857069,	240843028,240849462,240850015,240857331,	Kat3	1.01159	0.971485	-2.51386	0.0019802	1.08549	0.708841	0	1	0	0	0	1	0	0	0	0
ctrlafb_g1_1.3.0_00030863	chr2	-	105413336	105443909	105413336	105443909	10	105413336,105415633,105423887,105424953,105425125,105426968,105427966,105428158,105443678,105443845,	105413523,105415717,105424089,105425043,105425235,105427069,105428067,105428257,105443753,105443909,	Cpb1	-3.15341	0.0849661	-5.59988	0.00481444	-1.23191	0.852632	0	1	0	0	0	1	0	0	0	0
ctrlafb_g1_1.3.0_00031027	chr2	-	179283609	179294259	179283609	179294259	7	179283609,179285272,179289507,179290169,179291372,179291862,179294238,	179284237,179285592,179289785,179290477,179291653,179292128,179294259,	Fcrls	2.73877	0.00684405	3.53894	0.00100766	2.49332	0.176452	0	1	0	0	0	1	0	0	0	0
ctrlafb_g1_1.3.0_00036269	chr3	+	120614429	120644673	120614429	120644673	19	120614429,120615257,120615899,120617650,120618223,120619593,120621535,120623059,120625082,120625455,120627943,120628920,120634638,120637709,120638309,120639050,120640426,120643272,120644138,	120614694,120615419,120615982,120617732,120618372,120619696,120621733,120623144,120625233,120625650,120627973,120629060,120634779,120637904,120638528,120639259,120640502,120643461,120644673,	Mcm8	1.75677	0.0638887	3.58673	0.000998602	2.55005	0.310723	0	1	0	0	0	1	0	0	0	0
ctrlafb_g1_1.3.0_00036349	chr3	+	143194067	143236185	143194067	143236185	17	143194067,143212275,143216877,143217593,143219067,143219995,143223100,143224030,143225307,143227345,143228805,143230000,143231393,143232380,143233447,143234133,143235537,	143194395,143212444,143216999,143217719,143219198,143220114,143223221,143224181,143225475,143227483,143229021,143230095,143231569,143232526,143233558,143234320,143236185,	Tpx2	1.83726	1.97e-05	2.32779	0.00334712	0	1	0	1	0	0	0	1	0	0	0	0
ctrlafb_g1_1.3.0_00036757	chr3	-	13816997	13842322	13816997	13842322	7	13816997,13821712,13822828,13824910,13826849,13837207,13842198,	13817663,13821881,13822914,13825043,13827043,13837716,13842322,	Fbxw2	1.04284	0.734189	-2.54186	0.00455445	1.14989	1	0	1	0	0	0	1	0	0	0	0
ctrlafb_g1_1.3.0_00036849	chr3	-	44657361	45153509	44657361	45153509	16	44657361,44661151,44670037,44675969,44689827,44690568,44693675,44721453,44734549,44744015,44786632,44794820,44799208,44816388,45151306,45153252,	44657664,44661343,44670205,44676232,44689908,44690773,44693927,44721652,44734948,44744440,44786846,44794840,44799636,44816543,45151536,45153509,	Kcnh7	-0.233596	1	-2.89835	0.00179533	0	1	0	1	0	0	0	1	0	0	0	0
ctrlafb_g1_1.3.0_00037420	chr3	-	158356878	158387984	158356878	158387984	5	158356878,158360387,158360798,158361717,158387832,	158357159,158360538,158360979,158361885,158387984,	Ptgis	2.12394	0.321468	2.96342	0.00298092	1.66259	0.589898	0	1	0	0	0	1	0	0	0	0
ctrlafb_g1_1.3.0_00040553	chr4	+	65922943	65982738	65922943	65982738	12	65922943,65923507,65926722,65956821,65957972,65959513,65963590,65964950,65965934,65976032,65977778,65979439,	65923050,65923644,65926815,65956878,65958025,65959576,65963678,65965033,65966003,65976138,65977911,65982738,	Ttc26	1.59003	0.0327238	2.54318	0.00340204	1.73844	0.342403	0	1	0	0	0	1	0	0	0	0
ctrlafb_g1_1.3.0_00041247	chr4	-	42420152	42495654	42420152	42495654	7	42420152,42423923,42430017,42433721,42434904,42464499,42495516,	42423006,42424070,42430092,42433777,42435018,42464750,42495654,	Tfec	1.11676	0.57783	2.12632	0.00336767	1.09368	0.781436	0	1	0	0	0	1	0	0	0	0
ctrlafb_g1_1.3.0_00044047	chr5	+	25032748	25044150	25032748	25044150	12	25032748,25033676,25033813,25033995,25034730,25035812,25037888,25038696,25039248,25040864,25041611,25042477,	25032837,25033715,25033912,25034048,25034881,25035947,25038034,25038791,25039382,25040975,25041768,25044150,	Ccne2	1.26672	0.088907	2.51901	0.000597729	2.13677	1	0	1	0	0	0	1	0	0	0	0
ctrlafb_g1_1.3.0_00044339	chr5	+	130761328	130800627	130761328	130800627	19	130761328,130769744,130778042,130779156,130779591,130782880,130784647,130785420,130787174,130787706,130787853,130789080,130794609,130796096,130797683,130798162,130798945,130799486,130799709,	130761419,130769848,130778173,130779232,130779658,130782944,130784746,130785485,130787282,130787773,130787912,130789241,130794700,130796216,130797794,130798276,130799061,130799552,130800627,	Ttc39a	1.94872	0.0308773	3.2328	0.000820008	0	1	0	1	0	0	0	1	0	0	0	0
ctrlafb_g1_1.3.0_00048035	chr6	+	32462289	32519998	32462289	32519998	24	32462289,32463087,32465525,32466776,32468981,32470832,32474214,32474508,32475401,32479067,32483147,32499293,32500520,32501514,32502892,32503592,32508385,32512794,32513252,32514883,32516000,32517808,32518799,32519857,	32462416,32463204,32465596,32466868,32469109,32470965,32474379,32474653,32475526,32479252,32483207,32499437,32500589,32501567,32503001,32503802,32508465,32512930,32513455,32515029,32516132,32517918,32518963,32519998,	Wdr35l	1.26604	0.138256	2.3621	0.00156678	1.34048	0.425341	0	1	0	0	0	1	0	0	0	0
ctrlafb_g1_1.3.0_00048764	chr6	-	98798019	98840865	98798019	98840865	9	98798019,98803378,98805015,98808238,98811571,98820778,98824417,98839281,98840851,	98798286,98803593,98805221,98808387,98811876,98820919,98824673,98839631,98840865,	Tex21	2.43328	0.192693	2.90973	0.000800801	2.1095	0.491793	0	1	0	0	0	1	0	0	0	0
ctrlafb_g1_1.3.0_00048885	chr6	-	125871936	125975388	125871936	125975388	12	125871936,125894363,125895425,125909496,125921730,125924113,125924951,125961481,125963912,125966638,125968239,125975307,	125872801,125894562,125895539,125909687,125921846,125924213,125925029,125961712,125964024,125966668,125968371,125975388,	Tc2n	1.11306	0.430426	2.37499	0.000398645	-1.66686	1	0	1	0	0	0	1	0	0	0	0
ctrlafb_g1_1.3.0_00048939	chr6	-	133021596	133037633	133021596	133037633	3	133021596,133024635,133037485,	133021988,133025377,133037633,	Degs2	1.52381	0.529947	2.4764	0.00481348	1.75859	0.557828	0	1	0	0	0	1	0	0	0	0
ctrlafb_g1_1.3.0_00051084	chr7	+	68430069	68900500	68430069	68900500	9	68430069,68470309,68525786,68555916,68607966,68706657,68775207,68805405,68900098,	68430105,68470370,68526239,68556123,68608173,68706768,68775298,68805606,68900500,	Pgcp	-1.33078	0.00819244	-2.73159	0.00100361	-1.53598	1	0	1	0	0	0	1	0	0	0	0
ctrlafb_g1_1.3.0_00051134	chr7	+	91801534	92032966	91801534	92032966	46	91801534,91822472,91832403,91838484,91841779,91858808,91859812,91862477,91868551,91873877,91875089,91876681,91880624,91883107,91893462,91894489,91895569,91896997,91898419,91904045,91907122,91909788,91916984,91925825,91929964,91933896,91935030,91935417,91937010,91937799,91938308,91939374,91941534,91944715,91953169,91956092,91957462,91961523,91963328,91963679,92009175,92010099,92013058,92028332,920…	91801772,91822596,91832519,91838627,91841868,91858963,91859931,91862641,91868712,91874028,91875218,91876826,91880753,91883246,91893588,91894628,91895701,91897056,91898561,91904174,91907244,91909937,91917100,91925971,91930020,91934035,91935153,91935560,91937174,91937837,91938446,91939516,91941643,91944873,91953246,91956178,91957515,91961618,91963381,91963733,92009210,92010165,92013246,92028409,920…	Col14a1	1.70219	7.81e-06	4.4009	0.000598683	1.49336	1	0	1	0	0	0	1	0	0	0	0
ctrlafb_g1_1.3.0_00051331	chr7	+	123050344	123076871	123050344	123076871	9	123050344,123059539,123060199,123062927,123065279,123067764,123069601,123072629,123075579,	123050433,123059594,123060451,123063148,123065407,123068049,123069633,123072712,123076871,	Fam118a	1.5552	0.19354	2.34895	0.00219912	1.81192	0.311965	0	1	0	0	0	1	0	0	0	0
ctrlafb_g1_1.3.0_00051597	chr7	-	11325538	11327261	11325538	11327261	5	11325538,11325917,11326320,11326558,11327207,	11325755,11326174,11326467,11326714,11327261,	Cfd	-1.59265	0.00110864	-2.40395	0.00360721	-1.66923	0.114345	0	1	0	0	0	1	0	0	0	0
ctrlafb_g1_1.3.0_00051618	chr7	-	11736234	11747639	11736234	11747639	6	11736234,11736698,11740394,11740661,11745396,11747262,	11736635,11738318,11740454,11740787,11747250,11747639,	Zfp347	-1.22599	0.297205	2.0196	0.000799201	0	1	0	1	0	0	0	1	0	0	0	0
ctrlafb_g1_1.3.0_00051619	chr7	-	11736243	11754679	11736243	11754679	4	11736243,11740394,11740661,11754388,	11738318,11740454,11740787,11754679,	Giot1	-1.12825	0.533267	2.0196	0.00120096	-1.02498	0.952662	0	1	0	0	0	1	0	0	0	0
ctrlafb_g1_1.3.0_00051851	chr7	-	67315295	67328764	67315295	67328764	2	67315295,67328359,	67316870,67328764,	Inhbc	-1.35639	0.00581723	-2.34612	0.0010006	-1.31284	0.171947	0	1	0	0	0	1	0	0	0	0
ctrlafb_g1_1.3.0_00054958	chr8	+	10118375	10157451	10118375	10157451	10	10118375,10119017,10120373,10123020,10124130,10135237,10139876,10142662,10147304,10156174,	10118387,10119172,10120453,10123747,10124322,10135329,10140000,10142832,10147489,10157451,	Ccdc82	-1.00234	0.985778	3.17266	0.00102041	-1.75193	0.411612	0	1	0	0	0	1	0	0	0	0
ctrlafb_g1_1.3.0_00055409	chr8	+	97428114	97467180	97428114	97467180	9	97428114,97443124,97444254,97453735,97456862,97457916,97463333,97464701,97465499,	97428729,97443151,97444364,97453958,97456904,97458142,97463494,97464859,97467180,	Plscr4	1.51075	0.00632836	2.51257	0.000799361	1.97177	1	0	1	0	0	0	1	0	0	0	0
ctrlafb_g1_1.3.0_00058994	chr9	+	73878506	73905127	73878506	73905127	17	73878506,73882979,73883279,73884458,73886382,73887566,73893022,73894411,73895588,73899111,73900906,73901570,73902655,73903419,73904090,73904318,73904895,	73878613,73883034,73883437,73884686,73886511,73887797,73893223,73894555,73895740,73899305,73901074,73901686,73902827,73903554,73904239,73904425,73905127,	Plcd4	1.89629	0.0257335	6.25265	0.00101854	12.2278	1	0	1	0	0	0	1	0	0	0	0
ctrlafb_g1_1.3.0_00059030	chr9	+	78083238	78106933	78083238	78106933	14	78083238,78088280,78090293,78091937,78094009,78096098,78096430,78096779,78098783,78099505,78101092,78103472,78105237,78106208,	78083653,78088457,78090402,78092075,78094159,78096221,78096501,78096918,78098955,78099579,78101283,78103586,78105394,78106933,	Acsl3	1.91096	2.58e-08	2.34822	0.000597134	-1.92533	1	0	1	0	0	0	1	0	0	0	0
ctrlafb_g1_1.3.0_00059094	chr9	+	87037152	87098362	87037152	87098362	6	87037152,87040945,87094262,87095040,87095393,87097430,	87037273,87041800,87094393,87095127,87095612,87098362,	Ugt1a6	1.73035	0.000348608	2.17891	0.00019972	4.77092	1	0	1	0	0	0	1	0	0	0	0
ctrlafb_g1_1.3.0_00059095	chr9	+	87040861	87098362	87040861	87098362	5	87040861,87094262,87095040,87095393,87097430,	87041800,87094393,87095127,87095612,87098362,	Ugt1a6	1.74699	0.000245756	2.17891	0.00040008	8.99415	1	0	1	0	0	0	1	0	0	0	0
ctrlafb_g1_1.3.0_00059525	chr9	-	81866835	81910088	81866835	81910088	7	81866835,81868273,81870987,81888505,81894775,81896343,81909999,	81867438,81868317,81871121,81888582,81894817,81896499,81910088,	Col4a4	1.7622	0.181287	2.77821	0.00492805	2.91067	0.222691	0	1	0	0	0	1	0	0	0	0
ctrlafb_g1_1.3.0_00061307	chrX	+	16981096	17181453	16981096	17181453	15	16981096,17009458,17051340,17063027,17066316,17076866,17078666,17085532,17093996,17096914,17100695,17148091,17149501,17161808,17181127,	16981228,17009646,17051490,17063250,17066567,17076979,17078804,17085697,17094138,17097110,17100825,17148288,17149593,17161913,17181453,	Efhc2	3.62409	0.00707498	9.08608	0.000593707	3.86	0.0587785	0	1	0	0	0	1	0	0	0	0
ctrlafb_g1_1.3.0_00061347	chrX	+	26451917	26464885	26451917	26464885	6	26451917,26454061,26455373,26462014,26462246,26463107,	26452388,26454206,26456035,26462160,26462375,26464885,	Suv39h1	1.02904	0.86413	2.1469	0.00279441	0	1	0	1	0	0	0	1	0	0	0	0
ctrlafb_g1_1.3.0_00061348	chrX	+	26505715	26520399	26505715	26520399	4	26505715,26508298,26517904,26520084,	26505803,26508435,26518059,26520399,	Glod5	17.5386	0.0216374	4.27526	0.00141557	0.94249	0.0639823	0	1	0	0	0	1	0	0	0	0
ctrlafb_g1_1.3.0_00001135	chr1	+	206664587	206670455	206664587	206670455	7	206664587,206665669,206667164,206667927,206668595,206669293,206670200,	206664741,206665876,206667322,206667957,206668729,206669666,206670455,	Not RefSeq	-1.47538	0.00463007	-2.18026	0.0028152	-1.3551	1	0	1	0	0	0	1	0	0	0	0
ctrlafb_g1_1.3.0_00001136	chr1	+	206664587	206670455	206664587	206670455	7	206664587,206665669,206667927,206668595,206669293,206669519,206670200,	206664741,206665876,206667957,206668729,206669402,206669666,206670455,	Not RefSeq	-1.46222	0.00790162	-2.18026	0.00265631	-2.20038	1	0	1	0	0	0	1	0	0	0	0
ctrlafb_g1_1.3.0_00001137	chr1	+	206666946	206670455	206666946	206670455	5	206666946,206668595,206669293,206669519,206670200,	206667957,206668729,206669372,206669666,206670455,	Not RefSeq	-1.47632	0.00542642	-2.18026	0.00399521	-1.82238	1	0	1	0	0	0	1	0	0	0	0
ctrlafb_g1_1.3.0_00001917	chr1	-	82612833	82635223	82612833	82635223	14	82612833,82613415,82614339,82616348,82618297,82620538,82620743,82622901,82623497,82623727,82623908,82624554,82627216,82634992,	82613320,82613514,82614504,82616487,82618497,82620665,82620857,82623084,82623639,82623801,82623993,82624753,82627290,82635223,	Pld3	-1.05757	0.665914	-2.36946	0.00361736	1.59534	1	0	1	0	0	0	1	0	0	0	0
ctrlafb_g1_1.3.0_00001918	chr1	-	82612833	82635223	82612833	82635223	13	82612833,82613415,82614339,82616348,82618297,82620538,82620743,82622901,82623497,82623727,82623908,82624576,82634992,	82613320,82613514,82614504,82616487,82618497,82620665,82620857,82623084,82623639,82623801,82623993,82624753,82635223,	Pld3	-1.05645	0.672154	-2.36946	0.00298745	1.75384	1	0	1	0	0	0	1	0	0	0	0
ctrlafb_g1_1.3.0_00002719	chr1	-	206643814	206656261	206643814	206656261	8	206643814,206645620,206645831,206646799,206647004,206647519,206648064,206656149,	206645444,206645727,206645934,206646886,206647110,206647554,206648388,206656261,	RGD1307603	-1.81417	0.00893686	-2.11306	0.00217736	-2.02328	0.000859399	0	1	1	0	0	0	0	0	0	1
ctrlafb_g1_1.3.0_00002944	chr1	-	226591019	226619513	226591019	226619513	4	226591019,226592153,226598890,226619356,	226592029,226592237,226599149,226619513,	Not RefSeq	1.52623	0.0272338	2.03182	0.0004004	1.896	1	0	1	0	0	0	1	0	0	0	0
ctrlafb_g1_1.3.0_00003715	chr1	-	82612833	82627306	82612833	82627306	13	82612833,82613415,82614339,82616348,82618297,82620538,82620743,82622901,82623497,82623727,82623908,82624554,82627216,	82613320,82613514,82614504,82616487,82618497,82620665,82620857,82623084,82623639,82623801,82623993,82624753,82627306,	Pld3	-1.05761	0.665893	-2.36946	0.00217822	-1.25289	1	0	1	0	0	0	1	0	0	0	0
ctrlafb_g1_1.3.0_00003716	chr1	-	82612833	82627306	82612833	82627306	13	82612833,82613415,82614339,82616348,82618297,82620538,82620743,82622901,82623497,82623727,82623908,82624576,82627216,	82613320,82613514,82614504,82616487,82618497,82620665,82620857,82623084,82623639,82623801,82623993,82624753,82627306,	Pld3	-1.05447	0.683548	-2.36946	0.00138258	1.10875	1	0	1	0	0	0	1	0	0	0	0
ctrlafb_g1_1.3.0_00004378	chr1	+	206666947	206670436	206666947	206670436	6	206666947,206667927,206668595,206669293,206669519,206670200,	206667322,206667957,206668729,206669402,206669666,206670436,	Not RefSeq	-1.4155	0.0135196	-2.18026	0.00357995	-1.17312	1	0	1	0	0	0	1	0	0	0	0
ctrlafb_g1_1.3.0_00004379	chr1	+	206667332	206670454	206667332	206670454	6	206667332,206667927,206668595,206669293,206669519,206670200,	206667432,206667957,206668729,206669402,206669666,206670454,	Not RefSeq	-1.44057	0.0105858	-2.18026	0.00338039	-1.76387	1	0	1	0	0	0	1	0	0	0	0
ctrlafb_g1_1.3.0_00004776	chr1	-	206642676	206648227	206642676	206648227	7	206642676,206645620,206645831,206646799,206647004,206647519,206648064,	206645444,206645727,206645934,206646886,206647110,206647554,206648227,	RGD1307603	-1.81691	0.00887589	-2.11306	0.00159744	0	1	0	1	0	0	0	1	0	0	0	0
ctrlafb_g1_1.3.0_00004777	chr1	-	206642676	206648227	206642676	206648227	7	206642676,206645620,206645831,206646799,206647004,206647450,206648064,	206645444,206645727,206645934,206646886,206647110,206647554,206648227,	RGD1307603	-1.81633	0.00778295	-2.11306	0.00181855	-1.51691	0.0664879	0	1	0	0	0	1	0	0	0	0
ctrlafb_g1_1.3.0_00004833	chr1	-	226590755	226599125	226590755	226599125	3	226590755,226592153,226598890,	226592029,226592237,226599125,	Not RefSeq	1.45435	0.0403983	2.03182	0.000198491	-4.93213	0.440809	0	1	0	0	0	1	0	0	0	0
ctrlafb_g1_1.3.0_00005125	chr1	+	200924029	200928922	200924029	200928922	5	200924029,200924994,200927013,200927696,200928605,	200924205,200925135,200927198,200927837,200928922,	Cyp2e1	1.77149	6.94e-06	2.42059	0.00139693	2.24347	1	0	1	0	0	0	1	0	0	0	0
ctrlafb_g1_1.3.0_00005139	chr1	+	206664820	206670793	206664820	206670793	7	206664820,206665669,206667927,206668595,206669293,206669519,206670200,	206664879,206665876,206667957,206668729,206669402,206669666,206670793,	Not RefSeq	-1.45595	0.00913143	-2.18026	0.00295508	-1.67667	1	0	1	0	0	0	1	0	0	0	0
ctrlafb_g1_1.3.0_00005140	chr1	+	206664820	206670793	206664820	206670793	8	206664820,206665669,206667164,206667927,206668595,206669293,206669519,206670200,	206664879,206665876,206667322,206667957,206668729,206669402,206669666,206670793,	Not RefSeq	-1.4479	0.00910476	-2.18026	0.00258861	-1.62002	1	0	1	0	0	0	1	0	0	0	0
ctrlafb_g1_1.3.0_00005141	chr1	+	206665437	206670793	206665437	206670793	5	206665437,206667927,206668595,206669293,206670200,	206665876,206667957,206668729,206669666,206670793,	Not RefSeq	-1.48377	0.00459773	-2.18026	0.00140506	-2.50645	1	0	1	0	0	0	1	0	0	0	0
ctrlafb_g1_1.3.0_00005198	chr1	+	238911545	238947678	238911545	238947678	20	238911545,238914865,238915600,238916635,238918531,238919601,238922306,238924018,238925129,238926973,238928357,238929845,238932377,238937091,238938980,238940800,238943309,238943769,238945640,238947423,	238911774,238914899,238915636,238916677,238918564,238919742,238923536,238924156,238925248,238927033,238928482,238929972,238932532,238937267,238939090,238940997,238943410,238943919,238945782,238947678,	Kif20b	1.99624	8.32e-05	3.62179	0.00339321	1.25934	1	0	1	0	0	0	1	0	0	0	0
ctrlafb_g1_1.3.0_00005281	chr1	-	76249918	76254942	76249918	76254942	4	76249918,76252310,76252494,76254830,	76250201,76252408,76252568,76254942,	Sepw1	1.88388	5.87e-05	2.52194	0.0016116	-1.05802	0.972908	0	1	0	0	0	1	0	0	0	0
ctrlafb_g1_1.3.0_00005549	chr1	-	259347673	259350678	259347673	259350678	2	259347673,259350459,	259349805,259350678,	Add3	1.70634	0.0038478	2.41325	0.000989511	-2.50641	1	0	1	0	0	0	1	0	0	0	0
ctrlafb_g1_1.3.0_00005725	chr1	+	172013640	172020797	172013640	172020797	5	172013640,172014029,172014994,172016896,172019264,	172013922,172014196,172015158,172017159,172020797,	Spon1	1.58589	0.0676665	2.08226	0.00362976	3.04766	1	0	1	0	0	0	1	0	0	0	0
ctrlafb_g1_1.3.0_00005796	chr1	+	206665325	206670489	206665325	206670489	6	206665325,206667927,206668595,206669293,206669519,206670200,	206665876,206667957,206668729,206669402,206669666,206670489,	Not RefSeq	-1.46182	0.00802114	-2.18026	0.00238853	-1.38548	1	0	1	0	0	0	1	0	0	0	0
ctrlafb_g1_1.3.0_00005893	chr1	-	36494258	36498517	36494258	36498517	3	36494258,36494948,36498300,	36494417,36495614,36498517,	Fbxo5	1.79627	0.0312325	2.66274	0.000400882	-0.182518	0.247868	0	1	0	0	0	1	0	0	0	0
ctrlafb_g1_1.3.0_00006124	chr1	-	205018529	205166049	205018529	205166049	25	205018529,205023039,205027340,205029019,205034680,205039057,205039946,205043188,205043687,205043942,205047094,205050894,205053604,205065265,205068665,205069970,205074997,205078150,205080571,205084259,205085698,205087113,205099498,205108819,205165864,	205020267,205023144,205027524,205029071,205034832,205039202,205040046,205043245,205043798,205044143,205047168,205050965,205053698,205065425,205068799,205070034,205075038,205078205,205080622,205084313,205085849,205087211,205099830,205108964,205166049,	Ano1	1.83905	0.00442771	2.25799	0.0010014	-2.02008	0.527269	0	1	0	0	0	1	0	0	0	0
ctrlafb_g1_1.3.0_00006261	chr1	+	30165330	30181477	30165330	30181477	11	30165330,30166506,30168803,30171676,30172265,30173982,30176238,30177082,30177420,30178918,30181264,	30165532,30166671,30168932,30171731,30172355,30174054,30176301,30177168,30177526,30179071,30181477,	Trip13	2.85816	0.0117672	3.49053	0.000200844	2.21096	0.775904	0	1	0	0	0	1	0	0	0	0
ctrlafb_g1_1.3.0_00006646	chr1	-	185770309	185772433	185770309	185772433	3	185770309,185771664,185772265,	185770592,185771807,185772433,	Nupr1	-1.54642	0.0273601	-2.3109	0.00478755	-1.21628	0.694215	0	1	0	0	0	1	0	0	0	0
ctrlafb_g1_1.3.0_00006731	chr1	-	226590905	226647084	226590905	226647084	6	226590905,226592153,226598890,226619356,226622563,226646805,	226592029,226592237,226599149,226619508,226622656,226647084,	Not RefSeq	1.50658	0.0175974	2.03182	0.00020004	1.61528	0.455839	0	1	0	0	0	1	0	0	0	0
ctrlafb_g1_1.3.0_00006978	chr1	+	200918422	200928631	200918422	200928631	9	200918422,200919476,200923087,200923542,200924029,200924994,200927013,200927696,200928605,	200918711,200919635,200923236,200923702,200924205,200925135,200927198,200927837,200928631,	Cyp2e1	1.75981	2.5e-07	2.42059	0.00139526	3.35099	1	0	1	0	0	0	1	0	0	0	0
ctrlafb_g1_1.3.0_00007073	chr1	-	9288544	9323586	9288544	9323586	16	9288544,9293314,9294571,9295358,9305042,9307276,9308662,9310020,9313823,9315078,9316522,9318886,9320522,9321689,9322450,9323488,	9291119,9293359,9294723,9295459,9305325,9307372,9308930,9310147,9313929,9315123,9316641,9319026,9320693,9321899,9322505,9323586,	Not RefSeq	1.88005	1.69e-05	2.57221	0.000404449	19107.4	1	0	1	0	0	0	1	0	0	0	0
ctrlafb_g1_1.3.0_00007074	chr1	-	9288544	9323586	9288544	9323586	15	9288544,9294571,9295358,9305042,9307276,9308662,9310020,9313823,9315078,9316522,9318886,9320522,9321689,9322450,9323488,	9291119,9294723,9295459,9305325,9307372,9308930,9310147,9313929,9315123,9316641,9319026,9320693,9321899,9322505,9323586,	Not RefSeq	1.87266	1.93e-05	2.57221	0.00100523	-2.96873	1	0	1	0	0	0	1	0	0	0	0
ctrlafb_g1_1.3.0_00007143	chr1	-	82612833	82635196	82612833	82635196	13	82612833,82613415,82614339,82616348,82618297,82620538,82620743,82622901,82623497,82623727,82623908,82624554,82634992,	82613320,82613514,82614504,82616487,82618497,82620665,82620857,82623084,82623639,82623801,82623993,82624753,82635196,	Pld3	-1.0596	0.654645	-2.36946	0.00239425	-1.78308	1	0	1	0	0	0	1	0	0	0	0
ctrlafb_g1_1.3.0_00007304	chr1	-	205018529	205078310	205018529	205078310	18	205018529,205023039,205027340,205029019,205034680,205039057,205039946,205043188,205043687,205043942,205047094,205050894,205053604,205065265,205068665,205069970,205074997,205078150,	205020267,205023144,205027524,205029071,205034832,205039202,205040046,205043245,205043798,205044143,205047168,205050965,205053698,205065425,205068799,205070034,205075038,205078310,	Ano1	1.83362	0.00716786	2.25799	0.000601926	2.33362	0.488005	0	1	0	0	0	1	0	0	0	0
ctrlafb_g1_1.3.0_00007305	chr1	-	205018529	205109011	205018529	205109011	25	205018529,205023039,205027340,205029019,205034680,205039057,205039946,205043188,205043687,205043942,205047094,205050894,205053604,205065265,205068665,205069970,205074997,205078150,205078700,205080571,205084259,205085698,205087113,205099498,205108819,	205020267,205023144,205027524,205029071,205034832,205039202,205040046,205043245,205043798,205044143,205047168,205050965,205053698,205065425,205068799,205070034,205075038,205078205,205078765,205080622,205084313,205085849,205087211,205099830,205109011,	Ano1	1.87491	0.00335021	2.25799	0.00118977	0.347932	0.0193087	0	1	0	0	0	1	0	0	0	0
ctrlafb_g1_1.3.0_00007459	chr1	+	80189417	80191702	80189417	80191702	3	80189417,80191104,80191611,	80189515,80191397,80191702,	Not RefSeq	1.3268	0.600265	-2.62348	0.00079602	1.24611	0.781506	0	1	0	0	0	1	0	0	0	0
ctrlafb_g1_1.3.0_00007835	chr10	+	1492001	1527197	1492001	1527197	18	1492001,1493593,1495269,1501024,1501206,1501814,1502728,1504070,1505118,1508436,1510203,1511476,1517345,1519442,1521885,1523205,1524198,1525605,	1492269,1493698,1495325,1501113,1501335,1501873,1502791,1504139,1505216,1508528,1510341,1511606,1517475,1519626,1521993,1523357,1524285,1527197,	Rrn3	1.24596	0.0564601	2.22619	0.00315457	1.48674	1	0	1	0	0	0	1	0	0	0	0
ctrlafb_g1_1.3.0_00008073	chr10	+	37827422	37840030	37827422	37840030	3	37827422,37834753,37838483,	37827745,37835258,37840030,	RGD1310352	-1.06516	0.542097	-2.23885	0.00486322	-1.04457	1	0	1	0	0	0	1	0	0	0	0
ctrlafb_g1_1.3.0_00008774	chr10	+	109734599	109737555	109734599	109737555	2	109734599,109734960,	109734808,109737555,	Not RefSeq	-1.05295	0.749749	2.00725	0.00299162	1.0047	0.989412	0	1	0	0	0	1	0	0	0	0
ctrlafb_g1_1.3.0_00010012	chr10	+	57536055	57542317	57536055	57542317	11	57536055,57537951,57538174,57538379,57538847,57540454,57540793,57541186,57541762,57542013,57542169,	57537716,57538046,57538232,57538448,57538980,57540676,57540990,57541387,57541870,57542071,57542317,	Eno3	1.01161	0.949347	-2.16501	0.00262732	-1.87256	0.512247	0	1	0	0	0	1	0	0	0	0
ctrlafb_g1_1.3.0_00010013	chr10	+	57536055	57542317	57536055	57542317	10	57536055,57538174,57538379,57538847,57540454,57540793,57541186,57541762,57542013,57542169,	57538046,57538232,57538448,57538980,57540676,57540990,57541387,57541870,57542071,57542317,	Eno3	1.01816	0.92061	-2.16501	0.00423131	1.48194	0.634636	0	1	0	0	0	1	0	0	0	0
ctrlafb_g1_1.3.0_00011120	chr10	+	1519279	1527197	1519279	1527197	5	1519279,1521885,1523205,1524198,1525605,	1519626,1521993,1523357,1524285,1527197,	Rrn3	1.23181	0.077849	2.22619	0.00415924	-1.00759	1	0	1	0	0	0	1	0	0	0	0
ctrlafb_g1_1.3.0_00011570	chr10	-	106650421	106654299	106650421	106654299	7	106650421,106650720,106652271,106652895,106653105,106653310,106653721,	106650580,106651419,106652360,106653023,106653217,106653464,106654299,	Not RefSeq	1.35659	0.0428339	3.13663	0.00222492	0	1	0	1	0	0	0	1	0	0	0	0
ctrlafb_g1_1.3.0_00011768	chr10	+	87684891	87697865	87684891	87697865	11	87684891,87686594,87686981,87688025,87688803,87690516,87691205,87693088,87695611,87696585,87696976,	87685163,87686875,87687180,87688200,87688909,87690655,87691305,87693152,87695813,87696725,87697865,	Cdc6	2.74158	0.00955642	2.57561	0.00337637	2.22799	0.230401	0	1	0	0	0	1	0	0	0	0
ctrlafb_g1_1.3.0_00014719	chr11	+	65432789	65437127	65432789	65437127	2	65432789,65436910,	65433279,65437127,	Not RefSeq	1.21826	0.414259	2.68139	0.00396275	0.194343	1	0	1	0	0	0	1	0	0	0	0
ctrlafb_g1_1.3.0_00015868	chr12	-	4282710	4292349	4282710	4292349	6	4282710,4284616,4285392,4291274,4291506,4291896,	4283676,4284774,4285633,4291412,4291669,4292349,	Brca2	1.05916	0.821403	2.20971	0.0014093	-1.01277	1	0	1	0	0	0	1	0	0	0	0
ctrlafb_g1_1.3.0_00016526	chr12	-	4279623	4323693	4279623	4323693	28	4279623,4283019,4284616,4285392,4291274,4291506,4291896,4293709,4294891,4295111,4296354,4297957,4298657,4300178,4302207,4303137,4305345,4306790,4313105,4314815,4315645,4317212,4317503,4317835,4318389,4320106,4323357,4323533,	4279861,4283676,4284774,4285633,4291412,4291669,4292088,4293830,4295035,4295266,4296708,4298127,4298844,4300359,4302535,4303206,4305440,4311661,4314199,4314926,4315694,4317317,4317543,4317884,4318497,4320333,4323440,4323693,	Brca2	1.29997	0.116764	2.20971	0.00179176	0.0745589	1	0	1	0	0	0	1	0	0	0	0
ctrlafb_g1_1.3.0_00016678	chr12	-	4282952	4323693	4282952	4323693	27	4282952,4284616,4285392,4291274,4291506,4291896,4293709,4294891,4295111,4296354,4297957,4298657,4300178,4302207,4303137,4305345,4306790,4313105,4314815,4315645,4317212,4317503,4317835,4318389,4320106,4323357,4323533,	4283676,4284774,4285633,4291412,4291669,4292077,4293830,4295035,4295266,4296708,4298127,4298844,4300359,4302535,4303206,4305440,4311661,4314199,4314926,4315694,4317317,4317543,4317884,4318497,4320333,4323440,4323693,	Brca2	1.49539	0.0349014	2.20971	0.00200682	0.0407077	1	0	1	0	0	0	1	0	0	0	0
ctrlafb_g1_1.3.0_00016679	chr12	-	4282952	4323730	4282952	4323730	27	4282952,4284616,4285392,4291274,4291506,4291896,4293709,4294891,4295111,4296354,4297957,4298657,4300178,4302207,4303137,4305345,4306790,4313105,4314815,4315645,4317212,4317503,4317835,4318389,4320106,4323357,4323707,	4283676,4284774,4285633,4291412,4291669,4292088,4293830,4295035,4295266,4296708,4298127,4298844,4300359,4302535,4303206,4305440,4311661,4314199,4314926,4315694,4317317,4317543,4317884,4318497,4320333,4323440,4323730,	Brca2	1.49094	0.0362148	2.20971	0.00285598	1.13262	1	0	1	0	0	0	1	0	0	0	0
ctrlafb_g1_1.3.0_00017118	chr13	+	45187911	45192580	45187911	45192580	3	45187911,45191751,45192000,	45188921,45191887,45192580,	Klhdc8a	-1.52458	0.05975	-2.27731	0.00040282	1.08357	1	0	1	0	0	0	1	0	0	0	0
ctrlafb_g1_1.3.0_00017120	chr13	+	45187911	45195996	45187911	45195996	5	45187911,45190477,45192421,45193234,45194292,	45188921,45192164,45192636,45193335,45195996,	Klhdc8a	-1.69067	0.00575945	-2.27731	0.000402172	2.14195	1	0	1	0	0	0	1	0	0	0	0
ctrlafb_g1_1.3.0_00017121	chr13	+	45190302	45195996	45190302	45195996	5	45190302,45192000,45192421,45193234,45194292,	45191887,45192164,45192636,45193335,45195996,	Klhdc8a	-1.79632	0.00242894	-2.27731	0.000392157	-1.96799	1	0	1	0	0	0	1	0	0	0	0
ctrlafb_g1_1.3.0_00018000	chr13	-	71849550	71874034	71849550	71874034	6	71849550,71850963,71865558,71867727,71873232,71873779,	71850471,71851087,71865736,71867995,71873345,71874034,	Tor3a	-1.56304	0.0421552	-2.63577	0.00244449	-1.90505	1	0	1	0	0	0	1	0	0	0	0
ctrlafb_g1_1.3.0_00018081	chr13	+	45187911	45195996	45187911	45195996	5	45187911,45191751,45192421,45193234,45194292,	45188921,45192164,45192636,45193335,45195996,	Klhdc8a	-1.61216	0.0110756	-2.27731	0.000200321	-1.97566	1	0	1	0	0	0	1	0	0	0	0
ctrlafb_g1_1.3.0_00018083	chr13	+	45191967	45195996	45191967	45195996	3	45191967,45193234,45194292,	45192636,45193335,45195996,	Klhdc8a	-1.66674	0.00936534	-2.27731	0.000600962	-1.71232	1	0	1	0	0	0	1	0	0	0	0
ctrlafb_g1_1.3.0_00018247	chr13	+	45190256	45195996	45190256	45195996	4	45190256,45192421,45193234,45194292,	45192164,45192636,45193335,45195996,	Klhdc8a	-1.80149	0.00278409	-2.27731	0.000597729	-52.1015	1	0	1	0	0	0	1	0	0	0	0
ctrlafb_g1_1.3.0_00018405	chr13	+	45187911	45195996	45187911	45195996	4	45187911,45192000,45193234,45194292,	45188921,45192636,45193335,45195996,	Klhdc8a	-1.58804	0.00885398	-2.27731	0.000596659	-2.19875	1	0	1	0	0	0	1	0	0	0	0
ctrlafb_g1_1.3.0_00018488	chr13	-	71849648	71853533	71849648	71853533	3	71849648,71850963,71853483,	71850471,71851087,71853533,	Tor3a	-1.62391	0.0321346	-2.63577	0.0018018	-1.87443	1	0	1	0	0	0	1	0	0	0	0
ctrlafb_g1_1.3.0_00018593	chr13	-	53251717	53285629	53251717	53285629	12	53251717,53255409,53264247,53266050,53275342,53276080,53276457,53279176,53281592,53281857,53282754,53285594,	53252938,53255591,53264423,53266226,53275515,53276286,53276639,53279352,53281771,53282053,53282927,53285629,	Cfh	-1.11563	0.325406	-2.25293	0.00380076	1.03951	1	0	1	0	0	0	1	0	0	0	0
ctrlafb_g1_1.3.0_00019500	chr14	-	46594905	46610575	46594905	46610575	3	46594905,46601020,46610235,	46596566,46601193,46610575,	Not RefSeq	1.17636	0.34837	2.31049	0.00221774	-1.04722	0.942936	0	1	0	0	0	1	0	0	0	0
ctrlafb_g1_1.3.0_00019702	chr14	-	104482551	104497114	104482551	104497114	7	104482551,104485685,104490072,104491146,104491389,104492554,104496865,	104484250,104485776,104490160,104491219,104491417,104492645,104497114,	RGD1305110	1.20857	0.205984	2.26761	0.00441945	1.21529	1	0	1	0	0	0	1	0	0	0	0
ctrlafb_g1_1.3.0_00019886	chr14	-	38420003	38433713	38420003	38433713	5	38420003,38423116,38425651,38431042,38433447,	38420100,38423201,38425855,38431236,38433713,	Not RefSeq	1.05908	0.877589	-2.02769	0.000200481	1.12295	0.853907	0	1	0	0	0	1	0	0	0	0
ctrlafb_g1_1.3.0_00019897	chr14	-	46594892	46601170	46594892	46601170	2	46594892,46601024,	46596566,46601170,	Not RefSeq	1.1908	0.326135	2.31049	0.00259429	-1328.09	0.951955	0	1	0	0	0	1	0	0	0	0
ctrlafb_g1_1.3.0_00020033	chr14	+	79569176	79578850	79569176	79578850	9	79569176,79569789,79570775,79571340,79571856,79574911,79576205,79577629,79578725,	79569312,79570063,79570966,79571592,79571966,79575027,79576317,79577747,79578850,	Man2b2	1.55372	0.000217746	2.0059	0.00221685	1.66454	1	0	1	0	0	0	1	0	0	0	0
ctrlafb_g1_1.3.0_00020100	chr14	-	34904632	34936117	34904632	34936117	15	34904632,34908081,34908521,34908732,34911761,34912908,34913739,34915584,34917206,34917418,34917794,34918018,34919779,34921499,34935963,	34907012,34908186,34908620,34908843,34911883,34913035,34913827,34915734,34917316,34917522,34917920,34918124,34919960,34921613,34936117,	Kit	1.25058	0.146898	2.64073	0.0023933	1.07122	1	0	1	0	0	0	1	0	0	0	0
ctrlafb_g1_1.3.0_00020221	chr14	+	38109932	38339966	38109932	38339966	21	38109932,38156653,38171726,38188676,38215803,38266296,38277028,38279200,38281228,38285083,38293108,38297379,38298245,38304367,38306169,38307287,38317126,38320898,38321091,38337557,38339252,	38110223,38156794,38171920,38188883,38215987,38266409,38277135,38279310,38281344,38285190,38293339,38297524,38298352,38304480,38306279,38307421,38317239,38320947,38321266,38337691,38339966,	Corin	1.5153	0.146163	3.95057	0.000196386	-0.0163821	1	0	1	0	0	0	1	0	0	0	0
ctrlafb_g1_1.3.0_00020238	chr14	+	79562331	79578949	79562331	79578949	15	79562331,79563418,79564378,79566729,79567695,79569179,79569789,79570775,79571340,79571856,79572051,79574911,79576205,79577629,79578725,	79562358,79563595,79564576,79566919,79567836,79569312,79570063,79570966,79571592,79571966,79572267,79575027,79576317,79577747,79578949,	Man2b2	1.55189	0.000140916	2.0059	0.00303153	1.1276	1	0	1	0	0	0	1	0	0	0	0
ctrlafb_g1_1.3.0_00020314	chr14	-	46594892	46601265	46594892	46601265	2	46594892,46601020,	46596566,46601265,	Not RefSeq	1.19033	0.327096	2.31049	0.0030006	2.44554	0.219184	0	1	0	0	0	1	0	0	0	0
ctrlafb_g1_1.3.0_00020542	chr14	-	92685445	92693967	92685445	92693967	3	92685445,92691333,92693919,	92688151,92691448,92693967,	Fignl1	1.626	0.104429	3.74134	0.00214258	1.26358	1	0	1	0	0	0	1	0	0	0	0
ctrlafb_g1_1.3.0_00020559	chr14	-	107281270	107450960	107281270	107450960	12	107281270,107287844,107291566,107294431,107303746,107327962,107329264,107361906,107363354,107364102,107447405,107450891,	107281471,107288010,107291624,107294540,107303878,107328054,107329369,107361993,107363423,107364151,107447545,107450960,	Vrk2	1.43041	0.116541	2.07091	0.00221595	4.11797	0.266266	0	1	0	0	0	1	0	0	0	0
ctrlafb_g1_1.3.0_00024283	chr16	+	86228724	86230146	86228724	86230146	2	86228724,86229011,	86228858,86230146,	Not RefSeq	1.29189	0.184609	2.48799	0.00343643	1.26835	0.566716	0	1	0	0	0	1	0	0	0	0
ctrlafb_g1_1.3.0_00025126	chr17	-	23481996	23537358	23481996	23537358	8	23481996,23487207,23491091,23493134,23500991,23511071,23525178,23536804,	23485834,23487296,23491235,23493332,23501051,23511175,23525368,23537358,	Rnf144b	-1.28164	0.0478518	-2.83502	0.00272374	-1.44837	1	0	1	0	0	0	1	0	0	0	0
ctrlafb_g1_1.3.0_00025507	chr17	-	23482108	23487471	23482108	23487471	2	23482108,23487207,	23485834,23487471,	Rnf144b	-1.27387	0.0743613	-2.83502	0.00258913	-1.35535	1	0	1	0	0	0	1	0	0	0	0
ctrlafb_g1_1.3.0_00026107	chr17	+	24728075	25138270	24728075	25138270	7	24728075,24819679,24895114,24951177,24992366,25122230,25136411,	24728403,24819807,24895242,24951240,24992486,25124231,25138270,	Atxn1	-1.29415	0.257131	-2.43372	0.00433497	1.04575	1	0	1	0	0	0	1	0	0	0	0
ctrlafb_g1_1.3.0_00026363	chr17	+	24726194	25138270	24726194	25138270	8	24726194,24728275,24819679,24895114,24951177,24992366,25122230,25136411,	24726225,24728403,24819807,24895242,24951240,24992486,25124231,25138270,	Atxn1	-1.30053	0.249335	-2.43372	0.00401445	-1.76386	1	0	1	0	0	0	1	0	0	0	0
ctrlafb_g1_1.3.0_00026413	chr17	-	23482109	23534658	23482109	23534658	8	23482109,23487207,23491091,23493134,23500991,23511071,23525178,23534606,	23485834,23487296,23491235,23493332,23501051,23511175,23525368,23534658,	Rnf144b	-1.27731	0.0548893	-2.83502	0.00325998	-1.14229	1	0	1	0	0	0	1	0	0	0	0
ctrlafb_g1_1.3.0_00028899	chr19	+	35336342	35341585	35336342	35341585	5	35336342,35339734,35340104,35340355,35340650,	35336731,35339946,35340247,35340492,35341585,	Hsd11b2	-1.76717	0.00140864	-3.08191	0.00258295	-60.579	1	0	1	0	0	0	1	0	0	0	0
ctrlafb_g1_1.3.0_00029207	chr19	-	49842314	49844049	49842314	49844049	2	49842314,49843848,	49843768,49844049,	Taf1c	1.14433	0.465762	2.77459	0.0021908	1.2365	1	0	1	0	0	0	1	0	0	0	0
ctrlafb_g1_1.3.0_00030148	chr2	+	158988140	159015705	158988140	159015705	23	158988140,158989669,158990435,158991969,158998408,158998949,159000374,159001122,159003052,159004173,159005883,159007266,159008899,159009219,159009857,159010911,159011601,159012481,159012836,159013654,159013935,159014741,159015492,	158988690,158989847,158990626,158992145,158998572,158999076,159000514,159001272,159003216,159004406,159006068,159007427,159009124,159009298,159010009,159011037,159011790,159012625,159013009,159013836,159014167,159014924,159015705,	Smc4	1.5596	0.000149878	2.45253	0.000201898	1.09997	1	0	1	0	0	0	1	0	0	0	0
ctrlafb_g1_1.3.0_00030558	chr2	+	240848663	240857602	240848663	240857602	3	240848663,240849929,240857069,	240849462,240850015,240857602,	Kat3	-1.0189	0.852091	-2.51386	0.00179641	-1.04974	0.824706	0	1	0	0	0	1	0	0	0	0
ctrlafb_g1_1.3.0_00031510	chr2	+	116169416	116170729	116169416	116170729	2	116169416,116170492,	116170216,116170729,	Rpl22l1	-1.0663	0.797386	-2.84242	0.00118087	1.06801	0.924528	0	1	0	0	0	1	0	0	0	0
ctrlafb_g1_1.3.0_00032002	chr2	+	105202487	105262256	105202487	105262256	23	105202487,105203880,105208662,105209419,105210298,105214277,105217841,105220061,105221248,105229964,105230139,105233789,105238252,105240195,105244020,105245692,105251016,105251815,105253445,105253945,105254466,105255989,105260268,	105202681,105204087,105208828,105209552,105210395,105214468,105217936,105220127,105221335,105230043,105230183,105233886,105238395,105240333,105244155,105245871,105251140,105251993,105253570,105254057,105254646,105256069,105262256,	Hltf	1.92683	3.87e-07	2.27394	0.000199283	-0.29881	1	0	1	0	0	0	1	0	0	0	0
ctrlafb_g1_1.3.0_00032003	chr2	+	105203334	105262256	105203334	105262256	23	105203334,105208662,105209419,105210298,105212352,105214277,105217841,105220061,105221248,105229964,105230139,105233789,105238252,105240195,105244020,105245692,105251016,105251815,105253445,105253945,105254466,105255989,105260268,	105204087,105208828,105209552,105210395,105212426,105214468,105217936,105220127,105221335,105230043,105230183,105233886,105238395,105240333,105244155,105245871,105251140,105251993,105253570,105254057,105254646,105256069,105262256,	Hltf	1.93428	3.48e-07	2.27394	0.000198926	-1.96038	1	0	1	0	0	0	1	0	0	0	0
ctrlafb_g1_1.3.0_00032022	chr2	+	123051571	123062888	123051571	123062888	11	123051571,123051977,123052716,123052951,123053644,123054834,123055975,123058188,123059170,123061947,123062152,	123051702,123052071,123052835,123053053,123053781,123054916,123056107,123058276,123059996,123062025,123062888,	Exosc9	1.06073	0.647014	2.8508	0.00181232	-1.88073	1	0	1	0	0	0	1	0	0	0	0
ctrlafb_g1_1.3.0_00032394	chr2	+	35118977	35134926	35118977	35134926	5	35118977,35129562,35130140,35131497,35132740,	35119184,35129691,35130250,35131621,35134926,	Trim23	1.09637	0.534632	4.16202	0.00342328	-2.16826	1	0	1	0	0	0	1	0	0	0	0
ctrlafb_g1_1.3.0_00032423	chr2	+	116169826	116170729	116169826	116170729	3	116169826,116170095,116170492,	116169954,116170216,116170729,	Rpl22l1	-1.07281	0.789338	-2.84242	0.00178962	-1.06032	0.876255	0	1	0	0	0	1	0	0	0	0
ctrlafb_g1_1.3.0_00032736	chr2	+	35101019	35135061	35101019	35135061	12	35101019,35103564,35104539,35111346,35113725,35114534,35115827,35119050,35129562,35130140,35131497,35132740,	35101188,35103644,35104701,35111467,35114003,35114716,35116043,35119184,35129691,35130250,35131621,35135061,	Trim23	1.10891	0.419339	4.16202	0.00356506	1.55317	1	0	1	0	0	0	1	0	0	0	0
ctrlafb_g1_1.3.0_00032769	chr2	+	105202487	105262248	105202487	105262248	25	105202487,105203880,105208662,105209419,105210298,105212352,105214277,105217841,105220061,105221248,105229964,105230139,105230943,105233789,105238252,105240195,105244020,105245692,105251016,105251815,105253445,105253945,105254466,105255989,105260268,	105202681,105204087,105208828,105209552,105210395,105212426,105214468,105217936,105220127,105221335,105230043,105230183,105231029,105233886,105238395,105240333,105244155,105245871,105251140,105251993,105253570,105254057,105254646,105256069,105262248,	Hltf	1.93681	2.82e-07	2.27394	0.000401445	1.98129	1	0	1	0	0	0	1	0	0	0	0
ctrlafb_g1_1.3.0_00033105	chr2	+	158998415	159015779	158998415	159015779	19	158998415,158998949,159000392,159001122,159003052,159004173,159005883,159007266,159008899,159009219,159009857,159010911,159011601,159012481,159012836,159013654,159013935,159014741,159015492,	158998572,158999076,159000514,159001272,159003216,159004406,159006068,159007427,159009124,159009298,159010009,159011037,159011790,159012625,159013009,159013836,159014167,159014924,159015779,	Smc4	1.56107	0.000162471	2.45253	0.000797448	1.77235	1	0	1	0	0	0	1	0	0	0	0
ctrlafb_g1_1.3.0_00033377	chr2	+	123058645	123062892	123058645	123062892	3	123058645,123061947,123062152,	123059996,123062025,123062892,	Exosc9	1.06935	0.623269	2.8508	0.00202429	-1.21221	1	0	1	0	0	0	1	0	0	0	0
ctrlafb_g1_1.3.0_00033688	chr2	+	159001831	159015705	159001831	159015705	16	159001831,159003052,159004173,159005883,159007266,159008899,159009219,159009857,159010911,159011601,159012481,159012836,159013654,159013935,159014741,159015492,	159001865,159003216,159004406,159006068,159007427,159009124,159009298,159010009,159011037,159011790,159012625,159013009,159013836,159014167,159014924,159015705,	Smc4	1.57471	0.00014858	2.45253	0.00118366	1.7238	1	0	1	0	0	0	1	0	0	0	0
ctrlafb_g1_1.3.0_00036348	chr3	+	143194067	143234317	143194067	143234317	17	143194067,143201075,143212275,143216877,143217593,143219067,143219995,143223100,143224030,143225307,143227345,143228805,143230000,143231393,143232380,143233447,143234154,	143194191,143201144,143212444,143216999,143217719,143219198,143220114,143223221,143224181,143225475,143227483,143229021,143230095,143231569,143232526,143233558,143234317,	Tpx2	1.8345	3.96e-05	2.32779	0.00395257	1.72004	1	0	1	0	0	0	1	0	0	0	0
ctrlafb_g1_1.3.0_00038201	chr3	+	120615856	120644845	120615856	120644845	17	120615856,120617650,120618223,120619593,120621535,120623059,120625082,120625455,120627943,120628920,120634638,120637709,120638309,120639050,120640426,120643272,120644138,	120615982,120617732,120618372,120619696,120621733,120623144,120625233,120625650,120627973,120629060,120634779,120637904,120638528,120639259,120640502,120643461,120644845,	Mcm8	1.6741	0.100857	3.58673	0.00217263	1.08355	0.953668	0	1	0	0	0	1	0	0	0	0
ctrlafb_g1_1.3.0_00038224	chr3	+	145881865	145886090	145881865	145886090	2	145881865,145882715,	145882303,145886090,	Not RefSeq	-1.06737	0.535814	-2.05094	0.00334251	-2.22023	1	0	1	0	0	0	1	0	0	0	0
ctrlafb_g1_1.3.0_00038250	chr3	+	156789100	156849195	156789100	156849195	9	156789100,156796520,156820340,156838434,156840337,156843556,156844272,156846293,156848611,	156789277,156796603,156820429,156838492,156840497,156843670,156844393,156846393,156849195,	Eya2	-2.36699	0.0228257	-2.29786	0.00262573	-3.48025	0.224869	0	1	0	0	0	1	0	0	0	0
ctrlafb_g1_1.3.0_00038427	chr3	-	112386581	112395638	112386581	112395638	3	112386581,112393849,112394048,	112387708,112393900,112395638,	Myef2	1.15595	0.256558	2.08503	0.0049682	-1.28032	1	0	1	0	0	0	1	0	0	0	0
ctrlafb_g1_1.3.0_00038708	chr3	+	143194067	143236185	143194067	143236185	17	143194067,143212275,143216877,143217593,143219067,143219995,143223100,143224030,143225307,143227345,143228805,143230000,143231393,143232380,143233447,143234154,143235537,	143194410,143212444,143216999,143217719,143219198,143220114,143223221,143224181,143225475,143227483,143229021,143230095,143231569,143232526,143233558,143234320,143236185,	Tpx2	1.83645	2.02e-05	2.32779	0.00377508	-1.35986	1	0	1	0	0	0	1	0	0	0	0
ctrlafb_g1_1.3.0_00038902	chr3	-	145883237	145886085	145883237	145886085	2	145883237,145884019,	145883862,145886085,	Not RefSeq	-1.08817	0.419823	-2.05094	0.00255403	-2.57166	1	0	1	0	0	0	1	0	0	0	0
ctrlafb_g1_1.3.0_00039105	chr3	+	143194067	143236185	143194067	143236185	17	143194067,143212275,143216877,143217593,143219067,143219995,143223100,143224030,143225307,143227345,143228805,143230000,143231393,143232380,143233447,143234133,143235537,	143194191,143212444,143216999,143217719,143219198,143220114,143223221,143224181,143225475,143227483,143229021,143230095,143231569,143232526,143233558,143234320,143236185,	Tpx2	1.84574	1.74e-05	2.32779	0.00380685	2.75693	1	0	1	0	0	0	1	0	0	0	0
ctrlafb_g1_1.3.0_00039106	chr3	+	143194067	143236185	143194067	143236185	17	143194067,143212275,143216877,143217593,143219067,143219995,143223100,143224030,143225307,143227345,143228805,143230000,143231393,143232380,143233447,143234154,143235537,	143194395,143212444,143216999,143217719,143219198,143220114,143223221,143224181,143225475,143227483,143229021,143230095,143231569,143232526,143233558,143234320,143236185,	Tpx2	1.83645	2.02e-05	2.32779	0.0041958	0	1	0	1	0	0	0	1	0	0	0	0
ctrlafb_g1_1.3.0_00039330	chr3	-	146585434	146587683	146585434	146587683	2	146585434,146587412,	146586780,146587683,	Rbm39	-1.24702	0.0798253	-2.03144	0.00060024	-1.27373	1	0	1	0	0	0	1	0	0	0	0
ctrlafb_g1_1.3.0_00039490	chr3	+	143194067	143237044	143194067	143237044	18	143194067,143201075,143212275,143216877,143217593,143219067,143219995,143223100,143224030,143225307,143227345,143228805,143230000,143231393,143232380,143233447,143234133,143235537,	143194191,143201192,143212444,143216999,143217719,143219198,143220114,143223221,143224181,143225475,143227483,143229021,143230095,143231569,143232526,143233558,143234320,143237044,	Tpx2	1.83882	1.65e-05	2.32779	0.0029976	1.7413	1	0	1	0	0	0	1	0	0	0	0
ctrlafb_g1_1.3.0_00039863	chr3	+	143194067	143236260	143194067	143236260	18	143194067,143201075,143212275,143216877,143217593,143219067,143219995,143223100,143224030,143225307,143227345,143228805,143230000,143231393,143232380,143233447,143234154,143235537,	143194395,143201192,143212444,143216999,143217719,143219198,143220114,143223221,143224181,143225475,143227483,143229021,143230095,143231569,143232526,143233558,143234320,143236260,	Tpx2	1.83493	1.98e-05	2.32779	0.00224352	1.39555	1	0	1	0	0	0	1	0	0	0	0
ctrlafb_g1_1.3.0_00040433	chr4	+	21510332	21512524	21510332	21512524	3	21510332,21510536,21510947,	21510375,21510616,21512524,	Slc25a40	-1.02996	0.850036	2.15654	0.00182223	-52.9122	1	0	1	0	0	0	1	0	0	0	0
ctrlafb_g1_1.3.0_00041897	chr4	+	21497685	21512626	21497685	21512626	7	21497685,21499286,21500624,21504178,21506385,21510536,21510947,	21497753,21499410,21500797,21504287,21506466,21510616,21512626,	Slc25a40	1.04086	0.800388	2.15654	0.00198965	1.32074	1	0	1	0	0	0	1	0	0	0	0
ctrlafb_g1_1.3.0_00043506	chr4	+	21499190	21512741	21499190	21512741	6	21499190,21500624,21504178,21506385,21510536,21510947,	21499410,21500797,21504287,21506466,21510616,21512741,	Slc25a40	1.04484	0.779404	2.15654	0.00277502	0	1	0	1	0	0	0	1	0	0	0	0
ctrlafb_g1_1.3.0_00044807	chr5	-	29267093	29283381	29267093	29283381	8	29267093,29268327,29269072,29272074,29274032,29279390,29282314,29283086,	29267277,29268377,29269178,29272135,29274344,29279470,29282465,29283381,	Otud6b	1.50217	0.00580088	2.23704	0.00320963	3.13458	1	0	1	0	0	0	1	0	0	0	0
ctrlafb_g1_1.3.0_00045807	chr5	-	29267128	29283401	29267128	29283401	8	29267128,29268327,29269072,29272074,29274032,29279390,29282314,29283086,	29267277,29268377,29269178,29272135,29274344,29279466,29282465,29283401,	Otud6b	1.50217	0.00580088	2.23704	0.00312439	-4.29707	1	0	1	0	0	0	1	0	0	0	0
ctrlafb_g1_1.3.0_00046104	chr5	+	130795417	130800705	130795417	130800705	6	130795417,130797683,130798162,130798945,130799486,130799709,	130796216,130797794,130798276,130799061,130799552,130800705,	Ttc39a	1.22404	0.466452	3.2328	0.000592066	-2.2839e-05	0.499718	0	1	0	0	0	1	0	0	0	0
ctrlafb_g1_1.3.0_00046203	chr5	-	29267116	29283381	29267116	29283381	8	29267116,29268327,29269072,29272074,29274029,29279390,29282314,29283086,	29267277,29268377,29269178,29272132,29274344,29279470,29282465,29283381,	Otud6b	1.50217	0.00580088	2.23704	0.00481831	-0.389255	1	0	1	0	0	0	1	0	0	0	0
ctrlafb_g1_1.3.0_00046928	chr5	-	29221968	29283381	29221968	29283381	8	29221968,29267060,29268327,29269072,29274032,29279390,29282314,29283086,	29222016,29267277,29268377,29269178,29274344,29279470,29282465,29283381,	Otud6b	1.51058	0.00615703	2.23704	0.00279776	0.122043	1	0	1	0	0	0	1	0	0	0	0
ctrlafb_g1_1.3.0_00047151	chr5	+	130761328	130800627	130761328	130800627	18	130761328,130769744,130778042,130779156,130779591,130782880,130784647,130785420,130787174,130787706,130787853,130789080,130794609,130796096,130797683,130798162,130798945,130799486,	130761419,130769848,130778173,130779232,130779658,130782944,130784746,130785485,130787282,130787773,130787912,130789241,130794700,130796216,130797794,130798276,130799061,130800627,	Ttc39a	2.002	0.0153138	3.2328	0.000996413	4.66028	0.242838	0	1	0	0	0	1	0	0	0	0
ctrlafb_g1_1.3.0_00047249	chr5	-	29267112	29274075	29267112	29274075	4	29267112,29269072,29272074,29274032,	29268377,29269178,29272132,29274075,	Otud6b	1.22392	0.156667	2.23704	0.00436768	1.35326	1	0	1	0	0	0	1	0	0	0	0
ctrlafb_g1_1.3.0_00047437	chr5	+	130795345	130800771	130795345	130800771	5	130795345,130797683,130798162,130798945,130799486,	130796216,130797794,130798276,130799061,130800771,	Ttc39a	1.28415	0.320733	3.2328	0.000594884	-1.01815	0.982817	0	1	0	0	0	1	0	0	0	0
ctrlafb_g1_1.3.0_00047733	chr5	+	130793997	130800684	130793997	130800684	6	130793997,130796096,130797683,130798162,130798945,130799486,	130794700,130796216,130797794,130798276,130799061,130800684,	Ttc39a	1.45127	0.149845	3.2328	0.00119142	2.34889	0.424911	0	1	0	0	0	1	0	0	0	0
ctrlafb_g1_1.3.0_00047734	chr5	+	130797626	130800684	130797626	130800684	4	130797626,130798162,130798945,130799486,	130797794,130798276,130799061,130800684,	Ttc39a	2.00636	0.028734	3.2328	0.000602773	0.0779334	0.272265	0	1	0	0	0	1	0	0	0	0
ctrlafb_g1_1.3.0_00048884	chr6	-	125871936	125966963	125871936	125966963	10	125871936,125894363,125895425,125909496,125921730,125924113,125924951,125961481,125963912,125966638,	125872801,125894562,125895539,125909687,125921846,125924213,125925029,125961712,125964024,125966963,	Tc2n	1.08418	0.558004	2.37499	0.000401929	-5.53636	1	0	1	0	0	0	1	0	0	0	0
ctrlafb_g1_1.3.0_00049282	chr6	-	125872057	125975440	125872057	125975440	12	125872057,125894363,125895425,125909496,125921730,125924113,125924951,125961481,125963912,125967768,125968239,125975307,	125872801,125894562,125895539,125909687,125921846,125924213,125925029,125961712,125964024,125967887,125968371,125975440,	Tc2n	1.11285	0.428901	2.37499	0.000603622	-1.10201	1	0	1	0	0	0	1	0	0	0	0
ctrlafb_g1_1.3.0_00049547	chr6	-	125871936	125975416	125871936	125975416	12	125871936,125894363,125895425,125909496,125921730,125924113,125924951,125961481,125963912,125966638,125968239,125975307,	125872801,125894577,125895539,125909687,125921846,125924213,125925029,125961712,125964024,125966668,125968371,125975416,	Tc2n	1.11306	0.430426	2.37499	0.000400561	-0.244998	1	0	1	0	0	0	1	0	0	0	0
ctrlafb_g1_1.3.0_00049798	chr6	-	125871936	125975443	125871936	125975443	13	125871936,125872555,125894363,125895425,125909496,125921730,125924113,125924951,125961481,125963912,125966638,125968239,125975307,	125872309,125872801,125894562,125895539,125909687,125921846,125924213,125925029,125961712,125964024,125966668,125968371,125975443,	Tc2n	1.10345	0.474351	2.37499	0.000597967	-0.243352	1	0	1	0	0	0	1	0	0	0	0
ctrlafb_g1_1.3.0_00050069	chr6	-	127911616	127921917	127911616	127921917	4	127911616,127913552,127916512,127921799,	127912002,127913696,127916782,127921917,	Serpina6	-1.40814	0.00278427	-2.02602	0.00160128	-1.30441	1	0	1	0	0	0	1	0	0	0	0
ctrlafb_g1_1.3.0_00050224	chr6	+	143727852	143737486	143727852	143737486	5	143727852,143736015,143736281,143737168,143737363,	143727912,143736168,143736454,143737278,143737486,	Not RefSeq	1.93642	0.100552	2.29568	0.00275374	1.5998	0.606321	0	1	0	0	0	1	0	0	0	0
ctrlafb_g1_1.3.0_00050303	chr6	-	125871936	125975433	125871936	125975433	11	125871936,125894363,125895425,125909496,125921730,125924113,125924951,125961481,125963912,125968239,125975307,	125872801,125894562,125895539,125909687,125921846,125924213,125925029,125961712,125964024,125968371,125975433,	Tc2n	1.11683	0.415662	2.37499	0.000779879	1.58928	1	0	1	0	0	0	1	0	0	0	0
ctrlafb_g1_1.3.0_00050345	chr6	+	32468974	32516179	32468974	32516179	17	32468974,32470832,32474214,32474508,32475401,32479067,32483147,32499293,32500520,32501514,32502892,32503592,32508385,32512794,32513252,32514883,32516000,	32469109,32470965,32474379,32474653,32475526,32479252,32483207,32499437,32500589,32501567,32503001,32503802,32508465,32512930,32513455,32515029,32516179,	Wdr35l	1.26661	0.172175	2.3621	0.00198452	2.72443	0.708406	0	1	0	0	0	1	0	0	0	0
ctrlafb_g1_1.3.0_00050534	chr6	-	125871936	125975460	125871936	125975460	10	125871936,125894363,125895425,125909496,125921730,125924113,125924951,125961481,125963912,125975307,	125872801,125894562,125895539,125909687,125921846,125924213,125925029,125961712,125964024,125975460,	Tc2n	1.12907	0.373491	2.37499	0.000597491	2.44354	1	0	1	0	0	0	1	0	0	0	0
ctrlafb_g1_1.3.0_00050535	chr6	-	125871936	125975460	125871936	125975460	11	125871936,125894363,125895425,125909496,125921730,125924113,125924951,125961481,125963912,125967805,125975307,	125872801,125894562,125895539,125909687,125921846,125924213,125925029,125961712,125964024,125968371,125975460,	Tc2n	1.11816	0.407587	2.37499	0.00019992	1.47157	1	0	1	0	0	0	1	0	0	0	0
ctrlafb_g1_1.3.0_00050648	chr6	+	143736015	143746240	143736015	143746240	8	143736015,143736281,143737168,143737363,143737885,143741424,143742716,143746193,	143736168,143736454,143737278,143737503,143737984,143741611,143742856,143746240,	Not RefSeq	1.80363	0.0364028	2.29568	0.00278996	1.86995	0.601642	0	1	0	0	0	1	0	0	0	0
ctrlafb_g1_1.3.0_00050703	chr6	-	125871936	125967871	125871936	125967871	10	125871936,125894363,125895425,125909496,125921730,125924113,125924951,125961481,125963912,125967768,	125872801,125894562,125895539,125909687,125921846,125924213,125925029,125961712,125964024,125967871,	Tc2n	1.10524	0.466294	2.37499	0.000401768	0	1	0	1	0	0	0	1	0	0	0	0
ctrlafb_g1_1.3.0_00050704	chr6	-	127911665	127918428	127911665	127918428	4	127911665,127913552,127916512,127918370,	127912002,127913696,127916782,127918428,	Serpina6	-1.41193	0.00268956	-2.02602	0.00283803	1.09262	1	0	1	0	0	0	1	0	0	0	0
ctrlafb_g1_1.3.0_00051018	chr7	+	54654299	54688366	54654299	54688366	14	54654299,54661417,54672957,54675726,54676690,54678333,54680496,54682683,54683060,54685029,54685679,54686132,54687574,54688234,	54656795,54661833,54673021,54675924,54676913,54678453,54680593,54682892,54683224,54685166,54685800,54686281,54687748,54688366,	Not RefSeq	-1.28256	0.140065	-2.09477	0.0029964	1.0256	1	0	1	0	0	0	1	0	0	0	0
ctrlafb_g1_1.3.0_00051083	chr7	+	68429891	68900636	68429891	68900636	8	68429891,68525786,68555916,68607966,68706657,68775207,68805405,68900098,	68430105,68526239,68556123,68608173,68706768,68775298,68805606,68900636,	Pgcp	-1.33049	0.00823549	-2.73159	0.000803859	-1.10421	1	0	1	0	0	0	1	0	0	0	0
ctrlafb_g1_1.3.0_00051133	chr7	+	91801499	92032077	91801499	92032077	46	91801499,91822472,91832403,91838484,91841779,91858808,91859812,91862477,91868551,91873877,91875089,91876681,91880624,91883107,91893462,91894489,91895569,91896997,91898419,91904045,91907122,91909788,91916984,91925825,91929964,91933896,91935030,91935417,91937010,91937799,91938308,91939374,91941534,91944715,91953169,91956092,91957462,91961523,91963328,91963679,92009175,92010099,92013058,92028332,920…	91801772,91822596,91832519,91838627,91841868,91858963,91859931,91862641,91868712,91874028,91875218,91876826,91880753,91883246,91893588,91894628,91895701,91897056,91898561,91904174,91907244,91909937,91917100,91925971,91930020,91934035,91935153,91935560,91937174,91937837,91938446,91939516,91941643,91944873,91953246,91956178,91957515,91961618,91963381,91963733,92009210,92010165,92013246,92028409,920…	Col14a1	1.76353	2.25e-06	4.4009	0.00060036	1.62814	1	0	1	0	0	0	1	0	0	0	0
ctrlafb_g1_1.3.0_00052082	chr7	-	116391647	116420093	116391647	116420093	17	116391647,116392621,116394291,116395661,116396079,116396922,116398135,116398554,116405590,116405900,116407181,116407922,116412833,116413121,116413820,116414579,116419426,	116392415,116392757,116394562,116395829,116396195,116397035,116398233,116398699,116405699,116406012,116407317,116408126,116412874,116413299,116413887,116414712,116420093,	Tmprss6	-1.22065	0.0649775	-2.00056	0.00119784	-1.34891	1	0	1	0	0	0	1	0	0	0	0
ctrlafb_g1_1.3.0_00052435	chr7	+	25115100	25150409	25115100	25150409	19	25115100,25115722,25117469,25119652,25120061,25130019,25130867,25131249,25132812,25133863,25134414,25136842,25137195,25138464,25140148,25140473,25142057,25146534,25149247,	25115191,25115763,25117674,25119716,25120195,25130180,25131046,25131419,25132935,25134066,25135432,25137041,25137414,25138577,25140233,25140571,25142224,25146624,25150409,	Not RefSeq	1.25906	0.0476212	3.09779	0.00466153	1.20625	0.423418	0	1	0	0	0	1	0	0	0	0
ctrlafb_g1_1.3.0_00052449	chr7	+	54655229	54673049	54655229	54673049	3	54655229,54661417,54672957,	54656795,54661833,54673049,	Not RefSeq	-1.14962	0.461738	-2.09477	0.00380609	-0.274682	1	0	1	0	0	0	1	0	0	0	0
ctrlafb_g1_1.3.0_00052633	chr7	-	11736234	11747675	11736234	11747675	4	11736234,11740394,11740661,11745396,	11738318,11740454,11740787,11747675,	Zfp347	-1.19287	0.34845	2.0196	0.001	-2.30955	1	0	1	0	0	0	1	0	0	0	0
ctrlafb_g1_1.3.0_00052686	chr7	-	54647654	54656879	54647654	54656879	2	54647654,54655231,	54647709,54656879,	Not RefSeq	-1.0606	0.802596	-2.09477	0.00242229	-1.048	1	0	1	0	0	0	1	0	0	0	0
ctrlafb_g1_1.3.0_00052714	chr7	-	73428965	73443568	73428965	73443568	6	73428965,73433199,73435619,73441321,73442609,73443246,	73432330,73433312,73435723,73441454,73442703,73443568,	Rrm2b	1.24915	0.0656127	2.12793	0.00363636	1.78869	0.618833	0	1	0	0	0	1	0	0	0	0
ctrlafb_g1_1.3.0_00052957	chr7	+	68429874	68805781	68429874	68805781	7	68429874,68525786,68555916,68607966,68706657,68775207,68805405,	68430105,68526239,68556123,68608173,68706768,68775298,68805781,	Pgcp	-1.34458	0.00632503	-4.78261	0.00178112	-1.78021	1	0	1	0	0	0	1	0	0	0	0
ctrlafb_g1_1.3.0_00052971	chr7	+	91801534	92031910	91801534	92031910	46	91801534,91822472,91832403,91838484,91841779,91858808,91859812,91862477,91868551,91873877,91875089,91876681,91880624,91883107,91893462,91894489,91895569,91896997,91898419,91904045,91907122,91909788,91916984,91925825,91929964,91933896,91935030,91935417,91937010,91937799,91938308,91939374,91941534,91944715,91953169,91956092,91957462,91961523,91963328,91963679,92009175,92010103,92013058,92028332,920…	91801772,91822596,91832519,91838627,91841868,91858963,91859931,91862641,91868712,91874028,91875218,91876826,91880753,91883246,91893588,91894628,91895701,91897056,91898561,91904174,91907244,91909937,91917100,91925971,91930020,91934035,91935153,91935560,91937174,91937837,91938446,91939516,91941643,91944873,91953246,91956178,91957515,91961618,91963381,91963733,92009214,92010165,92013246,92028409,920…	Col14a1	1.76827	2.06e-06	4.4009	0.00079602	2.03947	1	0	1	0	0	0	1	0	0	0	0
ctrlafb_g1_1.3.0_00053880	chr7	-	11736234	11747757	11736234	11747757	5	11736234,11740394,11740661,11745396,11747262,	11738318,11740454,11740787,11747250,11747757,	Zfp347	-1.20437	0.320946	2.0196	0.00119048	0	1	0	1	0	0	0	1	0	0	0	0
ctrlafb_g1_1.3.0_00054267	chr7	-	116391756	116420081	116391756	116420081	17	116391756,116392621,116394291,116395661,116396079,116396922,116398135,116398554,116405590,116405900,116407181,116407922,116412833,116413121,116413820,116414579,116419426,	116392415,116392757,116394562,116395829,116396195,116397035,116398233,116398699,116405699,116406012,116407317,116408126,116412871,116413299,116413887,116414712,116420081,	Tmprss6	-1.22074	0.0648781	-2.00056	0.000999001	4.30283	1	0	1	0	0	0	1	0	0	0	0
ctrlafb_g1_1.3.0_00054531	chr7	-	29706160	29736004	29706160	29736004	11	29706160,29708612,29709537,29710987,29712027,29714426,29719484,29720055,29721718,29732836,29735785,	29706225,29708768,29709693,29711186,29712074,29714554,29719679,29720256,29721947,29732976,29736004,	Nedd1	1.15992	0.373883	2.47021	0.00222537	0.621683	1	0	1	0	0	0	1	0	0	0	0
ctrlafb_g1_1.3.0_00054729	chr7	+	91801534	92032981	91801534	92032981	46	91801534,91822476,91832403,91838484,91841779,91858808,91859812,91862477,91868551,91873877,91875089,91876681,91880624,91883107,91893462,91894489,91895569,91896997,91898419,91904045,91907122,91909788,91916984,91925825,91929964,91933896,91935030,91935417,91937010,91937799,91938308,91939374,91941534,91944715,91953169,91956092,91957462,91961523,91963328,91963679,92009175,92010099,92013058,92028332,920…	91801772,91822596,91832519,91838627,91841868,91858963,91859931,91862641,91868712,91874028,91875218,91876826,91880753,91883246,91893588,91894628,91895701,91897056,91898561,91904174,91907244,91909937,91917100,91925971,91930020,91934035,91935153,91935560,91937174,91937837,91938446,91939516,91941643,91944873,91953246,91956178,91957515,91961618,91963381,91963733,92009210,92010165,92013246,92028409,920…	Col14a1	1.70219	7.81e-06	4.4009	0.000397456	0.344883	1	0	1	0	0	0	1	0	0	0	0
ctrlafb_g1_1.3.0_00054959	chr8	+	10135172	10157451	10135172	10157451	5	10135172,10139876,10142662,10147304,10156174,	10135329,10140000,10142832,10147489,10157451,	Ccdc82	1.01816	0.945957	3.17266	0.00059125	-0.547125	0.066295	0	1	0	0	0	1	0	0	0	0
ctrlafb_g1_1.3.0_00055261	chr8	+	69056671	69148133	69056671	69148133	26	69056671,69080865,69081556,69084564,69087926,69094377,69096243,69097482,69102332,69103720,69105976,69106402,69110186,69114996,69116100,69127933,69129458,69129860,69130155,69130531,69134622,69135921,69137466,69145084,69146444,69147876,	69056879,69080938,69081686,69084895,69088175,69094446,69096412,69097723,69102398,69103778,69106120,69106577,69110286,69115214,69116245,69128066,69129593,69130066,69130283,69130672,69134738,69136052,69138562,69145203,69146538,69148133,	Not RefSeq	-1.11083	0.441353	2.00119	0.00472162	-1.42824	1	0	1	0	0	0	1	0	0	0	0
ctrlafb_g1_1.3.0_00056329	chr8	+	10118815	10157451	10118815	10157451	9	10118815,10120373,10123020,10124130,10135237,10139876,10142662,10147304,10156174,	10119172,10120453,10123747,10124322,10135329,10140000,10142832,10147489,10157451,	Ccdc82	-1.01787	0.908724	3.17266	0.000200723	-0.115971	1	0	1	0	0	0	1	0	0	0	0
ctrlafb_g1_1.3.0_00056472	chr8	+	97453122	97467157	97453122	97467157	6	97453122,97456862,97457916,97463333,97464701,97465499,	97453958,97456904,97458142,97463494,97464859,97467157,	Plscr4	1.46311	0.012926	2.51257	0.000398168	-3.15341	1	0	1	0	0	0	1	0	0	0	0
ctrlafb_g1_1.3.0_00056473	chr8	+	97463206	97467156	97463206	97467156	3	97463206,97464701,97465499,	97463494,97464859,97467156,	Plscr4	1.51016	0.00942181	2.51257	0.000804182	-1.01168	1	0	1	0	0	0	1	0	0	0	0
ctrlafb_g1_1.3.0_00056791	chr8	+	10122979	10157451	10122979	10157451	7	10122979,10124130,10135237,10139876,10142662,10147304,10156174,	10123747,10124322,10135329,10140000,10142832,10147489,10157451,	Ccdc82	1.00345	1	3.17266	0.000393701	0.246787	0.134511	0	1	0	0	0	1	0	0	0	0
ctrlafb_g1_1.3.0_00057859	chr8	+	10118361	10157540	10118361	10157540	10	10118361,10119017,10120370,10123020,10124130,10135237,10139876,10142662,10147304,10156174,	10118387,10119172,10120453,10123747,10124322,10135329,10140000,10142832,10147489,10157540,	Ccdc82	1.00331	1	3.17266	0.000201248	2.74357	1	0	1	0	0	0	1	0	0	0	0
ctrlafb_g1_1.3.0_00057860	chr8	+	10118375	10157607	10118375	10157607	9	10118375,10119017,10120373,10124130,10135237,10139876,10142662,10147304,10156174,	10118387,10119172,10120453,10124322,10135329,10140000,10142832,10147489,10157607,	Ccdc82	1.04663	0.805726	3.17266	0.00019972	1.72177	0.598827	0	1	0	0	0	1	0	0	0	0
ctrlafb_g1_1.3.0_00057904	chr8	+	69056641	69103764	69056641	69103764	10	69056641,69080865,69081556,69084564,69087926,69094377,69096243,69097482,69102332,69103720,	69056879,69080938,69081686,69084895,69088175,69094446,69096412,69097723,69102398,69103764,	Not RefSeq	-1.06483	0.805349	2.00119	0.00487409	1.7701	1	0	1	0	0	0	1	0	0	0	0
ctrlafb_g1_1.3.0_00058144	chr8	+	10127467	10157451	10127467	10157451	6	10127467,10135237,10139876,10142662,10147304,10156174,	10127503,10135329,10140000,10142832,10147489,10157451,	Ccdc82	1.01807	0.944984	3.17266	0.000201045	7.75517	0.252149	0	1	0	0	0	1	0	0	0	0
ctrlafb_g1_1.3.0_00058250	chr8	+	97456828	97467175	97456828	97467175	5	97456828,97457916,97463333,97464701,97465499,	97456904,97458142,97463494,97464859,97467175,	Plscr4	1.5087	0.00832901	2.51257	0.000403959	3.7085	1	0	1	0	0	0	1	0	0	0	0
ctrlafb_g1_1.3.0_00059029	chr9	+	78056521	78106933	78056521	78106933	15	78056521,78083239,78088280,78090293,78091937,78094009,78096098,78096430,78096779,78098783,78099505,78101092,78103472,78105237,78106208,	78056751,78083653,78088457,78090402,78092075,78094159,78096221,78096501,78096918,78098955,78099579,78101283,78103586,78105394,78106933,	Acsl3	1.9352	1.37e-08	2.34822	0.000602773	2.53739	1	0	1	0	0	0	1	0	0	0	0
ctrlafb_g1_1.3.0_00060863	chr9	+	78095951	78106758	78095951	78106758	9	78095951,78096430,78096779,78098783,78099505,78101092,78103472,78105237,78106208,	78096221,78096501,78096918,78098955,78099579,78101283,78103586,78105394,78106758,	Acsl3	1.94512	2.29e-08	2.34822	0.000606796	2.24783	1	0	1	0	0	0	1	0	0	0	0
ctrlafb_g1_1.3.0_00061346	chrX	+	26451727	26464885	26451727	26464885	6	26451727,26454061,26455373,26462014,26462246,26463107,	26451964,26454206,26456035,26462160,26462375,26464885,	Suv39h1	1.01172	0.933629	2.1469	0.00226804	1.07934	0.870523	0	1	0	0	0	1	0	0	0	0
ctrlafb_g1_1.3.0_00062079	chrX	+	26457232	26464885	26457232	26464885	3	26457232,26462014,26463107,	26457271,26462375,26464885,	Suv39h1	1.06825	0.751171	2.1469	0.00344339	-1.13014	0.894978	0	1	0	0	0	1	0	0	0	0
ctrlafb_g1_1.3.0_00062259	chrX	+	22208089	22217907	22208089	22217907	4	22208089,22214140,22216316,22217731,	22209841,22214259,22216465,22217907,	RGD1565685	1.05043	0.724124	2.16831	0.00342121	0	1	0	1	0	0	0	1	0	0	0	0
ctrlafb_g1_1.3.0_00062604	chrX	+	8254808	8263253	8254808	8263253	3	8254808,8255383,8259166,	8255008,8255451,8263253,	Not RefSeq	1.29271	0.135168	2.20032	0.000598205	1.81433	1	0	1	0	0	0	1	0	0	0	0
ctrlafb_g1_1.3.0_00062839	chrX	-	53778991	53821794	53778991	53821794	2	53778991,53821765,	53781362,53821794,	Not RefSeq	1.63431	0.0384568	2.79648	0.000987557	1.74608	0.254902	0	1	0	0	0	1	0	0	0	0
ctrlafb_g1_1.3.0_00063029	chrX	+	8251081	8263019	8251081	8263019	4	8251081,8254774,8255383,8259166,	8251206,8255008,8255451,8263019,	Not RefSeq	1.31258	0.0886418	2.20032	0.00079984	-1.45903	1	0	1	0	0	0	1	0	0	0	0
ctrlafb_g1_1.3.0_00000074	chr1	+	26788964	26951930	26788964	26951930	8	26788964,26919013,26926116,26938763,26945027,26947658,26949492,26951311,	26789085,26919128,26926264,26938864,26945065,26947718,26949508,26951930,	Tpd52l1	3.34208	6.74e-05	2.03852	0.00560897	-2.03818	1	1	0	0	0	1	0	0	0	0	0
ctrlafb_g1_1.3.0_00000090	chr1	+	30165330	30210271	30165330	30210271	14	30165330,30166506,30168803,30171676,30172265,30173982,30176238,30177082,30177420,30178918,30181264,30182211,30183442,30209920,	30165532,30166671,30168932,30171731,30172355,30174054,30176301,30177168,30177526,30179071,30181376,30182280,30183573,30210271,	Trip13	3.00736	0.0045874	3.49053	0.000198413	0.0651332	0.257708	1	1	0	0	0	0	0	1	0	0
ctrlafb_g1_1.3.0_00000099	chr1	+	34687756	34881134	34687756	34881134	28	34687756,34694731,34696206,34696343,34700558,34702354,34704432,34720583,34729198,34730365,34741320,34755214,34757362,34759628,34760642,34762584,34768795,34773818,34774332,34784768,34813500,34818024,34819362,34820091,34833032,34836644,34873834,34880678,	34688084,34694815,34696256,34696396,34700682,34702454,34704568,34720694,34729289,34730462,34741493,34755350,34757408,34759735,34760716,34762686,34768871,34773958,34774400,34784879,34813639,34818065,34819462,34820268,34833139,34836796,34873953,34881134,	Mthfd1l	2.80942	0.0012448	2.03565	0.0608923	2.36008	0.147877	1	0	0	0	1	0	0	0	0	0
ctrlafb_g1_1.3.0_00000205	chr1	+	63852716	63864605	63852716	63864605	15	63852716,63853401,63854505,63854941,63855316,63859201,63859879,63860220,63860589,63860926,63862676,63863154,63863377,63864193,63864376,	63852819,63853602,63854650,63855173,63855437,63859348,63860046,63860383,63860715,63861023,63862859,63863284,63863532,63864271,63864605,	Tmc4	2.56432	0.00227465	2.99833	0.000602894	2.89012	0.0858568	1	1	0	0	0	0	0	1	0	0
ctrlafb_g1_1.3.0_00000280	chr1	+	72908427	72923288	72908427	72923288	3	72908427,72913688,72915636,	72912401,72914990,72923288,	Zbtb45	-2.08049	0.00232496	1.11913	0.220505	0	1	1	0	0	0	1	0	0	0	0	0
ctrlafb_g1_1.3.0_00000322	chr1	+	78442182	78448579	78442182	78448579	9	78442182,78442519,78442676,78443045,78443392,78443656,78444100,78444990,78448194,	78442273,78442602,78442771,78443193,78443485,78443862,78444348,78445075,78448579,	Not RefSeq	-2.31159	0.00392737	-1.20878	0.31288	-10.8882	0.163164	1	0	0	0	1	0	0	0	0	0
ctrlafb_g1_1.3.0_00000391	chr1	+	81345425	81359415	81345425	81359415	9	81345425,81348678,81348994,81351683,81352548,81353163,81354719,81355079,81358849,	81345595,81348840,81349143,81351843,81352748,81353304,81354906,81355220,81359415,	Cyp2b2	2.06385	0.000327643	1.63751	0.0153723	1.48969	1	1	0	0	0	1	0	0	0	0	0
ctrlafb_g1_1.3.0_00000612	chr1	+	99562708	99577807	99562708	99577807	6	99562708,99563197,99565944,99574521,99576292,99577084,	99562741,99563392,99566051,99574658,99576353,99577807,	Htatip2	2.20619	0.000260447	1.67361	0.00355801	1.63961	1	1	0	0	0	1	0	0	0	0	0
ctrlafb_g1_1.3.0_00000628	chr1	+	110175554	110360215	110175554	110360215	22	110175554,110187659,110267289,110309075,110319415,110319897,110321118,110322816,110325726,110329208,110332038,110338271,110338482,110340968,110346270,110348896,110351982,110355426,110357895,110358068,110358582,110358915,	110175720,110188215,110267493,110309160,110319521,110320028,110321248,110323068,110325943,110329402,110332638,110338374,110338608,110341152,110346594,110348972,110352107,110355626,110357975,110358172,110358769,110360215,	Atp10a	3.64035	0.000987803	-1.09298	0.63901	3.10903	0.102049	1	0	0	0	1	0	0	0	0	0
ctrlafb_g1_1.3.0_00000636	chr1	+	118970882	119156600	118970882	119156600	14	118970882,119037629,119098663,119117812,119118864,119137890,119138932,119140897,119142896,119146425,119147596,119148883,119154301,119156287,	118970999,119037682,119099656,119117892,119118900,119138035,119138967,119140983,119143081,119146604,119147808,119149002,119154441,119156600,	Apba2	4.1209	0.00174417	1.32656	0.507185	4.43394	0.056796	1	0	0	0	1	0	0	0	0	0
ctrlafb_g1_1.3.0_00000674	chr1	+	134615998	134626417	134615998	134626417	4	134615998,134619182,134622694,134624073,	134616044,134619769,134622894,134626417,	Aen	2.03854	3.86e-09	1.63365	0.00903252	1.70376	0.269947	1	0	0	0	1	0	0	0	0	0
ctrlafb_g1_1.3.0_00000675	chr1	+	134615998	134625365	134615998	134625365	4	134615998,134619182,134622694,134624073,	134616290,134619769,134622894,134625365,	Aen	2.08233	1.43e-09	1.63365	0.0110869	2.20709	0.00154204	1	0	1	0	0	0	0	0	1	0
ctrlafb_g1_1.3.0_00000695	chr1	+	136112674	136133720	136112674	136133720	14	136112674,136118886,136119359,136122737,136123068,136124530,136124940,136125897,136127575,136128890,136129224,136129991,136130627,136132660,	136112802,136119018,136119481,136122970,136123238,136124679,136125087,136126033,136127670,136129036,136129334,136130101,136130726,136133720,	Prc1	2.74542	5.12e-08	-1.00232	0.747567	2.65682	0.195865	1	0	0	0	1	0	0	0	0	0
ctrlafb_g1_1.3.0_00000696	chr1	+	136112674	136133720	136112674	136133720	14	136112674,136118886,136119359,136122737,136123068,136124530,136124940,136125897,136127575,136128890,136129224,136129991,136130627,136132660,	136112802,136119018,136119481,136122970,136123238,136124679,136125087,136126033,136127670,136129036,136129334,136130101,136130803,136133720,	Prc1	2.71492	7.7e-08	-1.00232	0.749052	2.24259	0.0744003	1	0	0	0	1	0	0	0	0	0
ctrlafb_g1_1.3.0_00000709	chr1	+	138054145	138099713	138054145	138099713	11	138054145,138058061,138075826,138077934,138083320,138085754,138086407,138088519,138090187,138090449,138097986,	138054255,138058173,138075929,138078031,138083423,138085836,138086528,138088623,138090279,138090568,138099713,	Tm6sf1	3.01593	1.65e-09	2.2378	0.0047356	-2.53653e-05	1	1	1	0	0	0	0	0	1	0	0
ctrlafb_g1_1.3.0_00000710	chr1	+	138077899	138099713	138077899	138099713	8	138077899,138083320,138085754,138086407,138088519,138090187,138090449,138097986,	138078031,138083423,138085836,138086528,138088623,138090279,138090568,138099713,	Tm6sf1	3.00045	1.61e-09	2.2378	0.00451866	1.06075	1	1	1	0	0	0	0	0	1	0	0
ctrlafb_g1_1.3.0_00000728	chr1	+	146220504	146422659	146220504	146422659	15	146220504,146220880,146313735,146317553,146354410,146364492,146373600,146397542,146416334,146416722,146418017,146418494,146419174,146419547,146422425,	146220562,146221077,146313868,146317702,146354485,146364653,146373703,146397651,146416431,146416835,146418122,146418636,146419347,146419648,146422659,	Me3	-2.62413	0.000276319	-2.65445	0.000806614	-2.34271	1	1	1	0	0	0	0	0	1	0	0
ctrlafb_g1_1.3.0_00000869	chr1	+	177830613	177869061	177830613	177869061	14	177830613,177832040,177843796,177844234,177846633,177848742,177852653,177852909,177855516,177861075,177863170,177863407,177864421,177868371,	177830710,177832224,177844006,177844441,177846776,177848895,177852732,177853032,177855596,177861176,177863297,177863506,177864540,177869061,	Acsm2	3.28273	4.61e-24	2.8011	0.000397377	3.59238	2.97587e-09	1	1	1	1	0	0	0	0	0	0
ctrlafb_g1_1.3.0_00000894	chr1	+	181002814	181012741	181002814	181012741	11	181002814,181003124,181003802,181004716,181005502,181006888,181010458,181011417,181011675,181011927,181012241,	181003073,181003253,181003970,181004860,181005595,181007107,181010613,181011494,181011829,181012109,181012741,	Plk1	2.10671	0.000624946	1.56581	0.0424843	2.20125	0.062426	1	0	0	0	1	0	0	0	0	0
ctrlafb_g1_1.3.0_00001014	chr1	+	190378412	190693131	190378412	190693131	39	190378412,190382863,190383700,190386649,190388254,190389656,190392903,190393769,190397520,190399709,190400549,190404302,190407476,190421336,190423772,190424629,190425008,190428227,190429527,190430333,190433485,190434843,190435471,190436348,190437595,190438931,190439564,190440458,190442115,190443447,190445093,190446481,190458435,190459894,190461021,190465821,190468389,190469983,190693116,	190378488,190382889,190383729,190386681,190388287,190389981,190392929,190393798,190397552,190399735,190400578,190404334,190407799,190421362,190423798,190424658,190425040,190428550,190429556,190430368,190433514,190434872,190435494,190436495,190437803,190438960,190439588,190440605,190442323,190443476,190445416,190446510,190458586,190460102,190461205,190466209,190468660,190470512,190693131,	Dmbt1	7.52585	9.54e-31	6.31282	0.000394089	0	1	1	1	0	0	0	0	0	1	0	0
ctrlafb_g1_1.3.0_00001015	chr1	+	190378412	190693131	190378412	190693131	36	190378412,190382863,190383700,190386649,190388254,190389656,190392903,190393769,190397520,190399709,190400549,190404302,190405836,190416680,190428226,190429527,190430333,190433485,190434843,190435471,190436348,190437595,190438931,190439564,190440458,190442115,190443447,190445093,190446481,190458435,190459894,190461021,190465821,190468389,190469983,190693116,	190378488,190382889,190383729,190386681,190388287,190389981,190392929,190393798,190397552,190399735,190400578,190404334,190405870,190416782,190428550,190429556,190430368,190433514,190434872,190435494,190436495,190437803,190438960,190439588,190440605,190442323,190443476,190445416,190446510,190458586,190460102,190461205,190466209,190468660,190470512,190693131,	Dmbt1	7.58994	1.37e-30	6.31282	0.000393623	-0.000763459	1	1	1	0	0	0	0	0	1	0	0
ctrlafb_g1_1.3.0_00001016	chr1	+	190400549	190693113	190400549	190693113	31	190400549,190404302,190405836,190416680,190428226,190497869,190508537,190509365,190542985,190546121,190546958,190556994,190560329,190567982,190648027,190648390,190651479,190652771,190653582,190663690,190664593,190665856,190667195,190668523,190670386,190671355,190672608,190673736,190688418,190690983,190692585,	190400578,190404334,190405870,190416782,190428550,190497877,190508554,190509394,190543017,190546147,190546987,190557319,190560355,190568008,190648056,190648421,190651803,190652800,190653617,190663719,190664741,190666064,190667519,190668552,190670406,190671505,190672816,190673920,190688806,190691254,190693113,	Dmbt1	2.01822	0.00126409	-1.61053	0.252562	2.0054	1	1	0	0	0	1	0	0	0	0	0
ctrlafb_g1_1.3.0_00001035	chr1	+	196629366	196866937	196629366	196866937	5	196629366,196693362,196826547,196860063,196866635,	196629426,196693498,196826707,196860202,196866937,	Mgmt	4.32664	1.54e-14	4.08203	0.00020141	4.41559	4.76286e-13	1	1	1	1	0	0	0	0	0	0
ctrlafb_g1_1.3.0_00001124	chr1	+	206234532	206243241	206234532	206243241	4	206234532,206239383,206240731,206241603,	206234582,206239580,206240905,206243241,	RGD1311946	2.09154	0.00491071	1.35151	0.128729	2.06949	0.0991987	1	0	0	0	1	0	0	0	0	0
ctrlafb_g1_1.3.0_00001307	chr1	+	215581410	215597220	215581410	215597220	3	215581410,215590493,215594289,	215581464,215590696,215597220,	Fam111a	3.45243	7.2e-09	4.88013	0.00061665	3.49766	0.000819444	1	1	1	1	0	0	0	0	0	0
ctrlafb_g1_1.3.0_00001329	chr1	+	223731675	223773285	223731675	223773285	13	223731675,223741189,223747332,223749427,223751299,223752943,223754391,223759535,223761746,223763710,223765984,223769825,223772659,	223731768,223741293,223747472,223749556,223751360,223753071,223754504,223759637,223761930,223763874,223766141,223769899,223773285,	Aldh1a1	3.7349	2.52e-09	4.31435	0.000795071	3.85024	1.39665e-10	1	1	1	1	0	0	0	0	0	0
ctrlafb_g1_1.3.0_00001355	chr1	+	230666736	230698216	230666736	230698216	19	230666736,230679433,230683747,230685189,230686923,230687380,230687596,230688295,230688518,230689128,230689873,230691538,230692215,230692659,230694006,230695039,230695455,230696304,230697569,	230667000,230679552,230683869,230685311,230687294,230687502,230687718,230688414,230688643,230689299,230690091,230691656,230692354,230692800,230694152,230695122,230695535,230696473,230698216,	Vldlr	2.9154	0.000451881	1.50233	0.117042	1.7128	0.651843	1	0	0	0	1	0	0	0	0	0
ctrlafb_g1_1.3.0_00001381	chr1	+	238259441	238275381	238259441	238275381	8	238259441,238267385,238268546,238270598,238270815,238271313,238272190,238272890,	238259597,238267522,238268654,238270662,238270871,238271377,238272214,238275381,	Fas	2.03525	4.19e-05	2.17988	0.000989315	2.1713	0.00494509	1	1	1	1	0	0	0	0	0	0
ctrlafb_g1_1.3.0_00001385	chr1	+	238892119	238947678	238892119	238947678	35	238892119,238893865,238897103,238897269,238898168,238900611,238904500,238904966,238905698,238906835,238906991,238907878,238908766,238910101,238910396,238911666,238914865,238915600,238916635,238918531,238919601,238922306,238924018,238925129,238926973,238928357,238929845,238932377,238937091,238938980,238940800,238943309,238943769,238945640,238947423,	238892208,238894012,238897189,238897385,238898306,238900795,238904536,238905190,238905809,238906906,238907137,238908040,238909053,238910240,238910537,238911774,238914899,238915636,238916677,238918564,238919742,238923536,238924156,238925248,238927033,238928482,238929972,238932532,238937267,238939090,238940997,238943410,238943919,238945782,238947678,	Kif20b	2.08383	9.65e-05	3.62179	0.00238996	0.0326557	0.221902	1	1	0	0	0	0	0	1	0	0
ctrlafb_g1_1.3.0_00001386	chr1	+	238892139	238947678	238892139	238947678	35	238892139,238893865,238897103,238897269,238898168,238900611,238904500,238904966,238905698,238906835,238906991,238907878,238908766,238910101,238910396,238911666,238914865,238915600,238916635,238918531,238919601,238922306,238924018,238925129,238926973,238928357,238929845,238932377,238937091,238938980,238940800,238943309,238943769,238945640,238947423,	238892204,238894012,238897189,238897385,238898306,238900795,238904536,238905190,238905809,238906906,238907137,238908040,238909053,238910240,238910537,238911774,238914899,238915636,238916677,238918564,238919742,238923536,238924156,238925248,238927033,238928482,238929972,238932532,238937267,238939090,238940997,238943410,238943919,238945782,238947678,	Kif20b	2.08383	9.65e-05	3.62179	0.0017762	0	1	1	1	0	0	0	0	0	1	0	0
ctrlafb_g1_1.3.0_00001404	chr1	+	241668938	241722847	241668938	241722847	22	241668938,241677328,241677624,241677810,241680569,241680864,241682844,241683176,241693598,241696718,241702206,241703325,241703961,241706718,241711191,241711393,241712787,241713413,241715644,241717806,241718814,241721345,	241669206,241677460,241677721,241677888,241680754,241680988,241682934,241683418,241693693,241696806,241702293,241703513,241704168,241706890,241711316,241711551,241712893,241713692,241715866,241717954,241718930,241722847,	Kif11	2.43989	1.19e-07	2.03628	0.0018018	4.64006	0.00826288	1	1	0	0	0	0	0	1	0	0
ctrlafb_g1_1.3.0_00001408	chr1	+	242382809	242398281	242382809	242398281	9	242382809,242385230,242387026,242387903,242392495,242393065,242394560,242395242,242397155,	242382936,242385424,242387301,242387971,242392645,242393375,242394631,242395367,242398281,	Cep55	2.84097	0.000211171	-1.19085	0.679482	1.83742	0.422338	1	0	0	0	1	0	0	0	0	0
ctrlafb_g1_1.3.0_00001409	chr1	+	242386875	242398281	242386875	242398281	7	242386875,242387903,242392495,242393065,242394560,242395242,242397155,	242387301,242387971,242392645,242393375,242394631,242395367,242398281,	Cep55	3.00145	0.000280341	-1.19085	0.68109	6.48244	0.174443	1	0	0	0	1	0	0	0	0	0
ctrlafb_g1_1.3.0_00001566	chr1	+	267885083	267895020	267885083	267895020	12	267885083,267888411,267890256,267891020,267891230,267892194,267892548,267892807,267893100,267893605,267894115,267894612,	267885207,267888621,267890397,267891153,267891488,267892292,267892688,267892887,267893244,267893742,267894187,267895020,	LOC100365112	4.1741	1.11e-22	2.82176	0.000802729	4.12287	1	1	1	0	0	0	0	0	1	0	0
ctrlafb_g1_1.3.0_00001567	chr1	+	267887344	267894934	267887344	267894934	11	267887344,267888411,267890256,267891020,267892194,267892548,267892807,267893100,267893605,267894115,267894612,	267887511,267888621,267890397,267891488,267892292,267892688,267892887,267893244,267893742,267894187,267894934,	LOC100365112	4.15398	2.73e-23	2.82176	0.000796495	5.14456	1	1	1	0	0	0	0	0	1	0	0
ctrlafb_g1_1.3.0_00001568	chr1	+	267887420	267894987	267887420	267894987	12	267887420,267888411,267890256,267891020,267891230,267892194,267892548,267892807,267893100,267893605,267894115,267894612,	267887511,267888621,267890397,267891153,267891488,267892292,267892688,267892887,267893244,267893742,267894187,267894987,	Ces2c	4.14751	1.06e-22	2.82176	0.00119071	7.02332	1	1	1	0	0	0	0	0	1	0	0
ctrlafb_g1_1.3.0_00001616	chr1	-	13628658	13635958	13628658	13635958	5	13628658,13630456,13634106,13634987,13635558,	13629676,13630994,13634286,13635122,13635958,	Hebp2	2.6151	0.000942812	2.35517	0.0177645	2.52115	0.0427954	1	0	0	0	1	0	0	0	0	0
ctrlafb_g1_1.3.0_00001667	chr1	-	36492134	36498503	36492134	36498503	5	36492134,36493232,36494327,36494948,36498300,	36492910,36493399,36494417,36495614,36498503,	Fbxo5	2.06828	0.000308999	1.6495	0.035102	2.33491	0.0758257	1	0	0	0	1	0	0	0	0	0
ctrlafb_g1_1.3.0_00001678	chr1	-	41097174	41103997	41097174	41103997	5	41097174,41097993,41098438,41101741,41103957,	41097586,41098070,41098561,41101782,41103997,	Dynlt1	2.27581	2.77e-06	1.31435	0.0475615	2.16795	0.0390836	1	0	0	0	1	0	0	0	0	0
ctrlafb_g1_1.3.0_00001679	chr1	-	41178195	41221735	41178195	41221735	13	41178195,41179227,41180574,41181016,41181974,41182284,41186316,41190667,41191827,41192473,41193651,41197532,41221242,	41179063,41179478,41180666,41181176,41182104,41182447,41186412,41190813,41191910,41192747,41193746,41197615,41221735,	Ezr	2.00859	8.71e-08	1.70262	0.000788177	2.09447	0.0130195	1	0	0	0	1	0	0	0	0	0
ctrlafb_g1_1.3.0_00002011	chr1	-	86113706	86120488	86113706	86120488	8	86113706,86114014,86114469,86114588,86115368,86115474,86117044,86120472,	86113882,86114051,86114505,86114662,86115391,86115506,86117095,86120488,	Fxyd3	2.4825	0.00428944	1.25011	0.140422	-1.08563	0.958677	1	0	0	0	1	0	0	0	0	0
ctrlafb_g1_1.3.0_00002062	chr1	-	95081948	95146449	95081948	95146449	42	95081948,95082785,95084558,95087625,95089487,95089701,95090309,95091264,95092061,95095856,95097059,95098164,95098398,95099058,95099429,95101091,95103141,95103464,95103901,95104489,95105111,95105972,95106743,95107299,95107819,95108899,95113592,95114126,95114791,95115057,95116907,95119755,95127051,95128201,95129501,95129884,95131892,95132432,95132728,95135290,95140808,95146412,	95082500,95082957,95084666,95087833,95089610,95089789,95090437,95091425,95092273,95096068,95097307,95098316,95098502,95099264,95099573,95101303,95103312,95103587,95104038,95104695,95105242,95106080,95106903,95107368,95107940,95109086,95113706,95114299,95114964,95115209,95117025,95119850,95127191,95128299,95129564,95129976,95131915,95132534,95132755,95135446,95141203,95146449,	Myh14	2.16877	0.000114785	1.89926	0.0416333	1.7851	1	1	0	0	0	1	0	0	0	0	0
ctrlafb_g1_1.3.0_00002099	chr1	-	95773485	95803542	95773485	95803542	25	95773485,95774952,95775148,95775302,95775624,95779011,95779310,95779801,95780971,95785436,95785824,95787705,95787928,95788756,95789044,95790017,95792022,95792234,95792554,95796588,95796992,95797285,95797735,95803169,95803473,	95774019,95775057,95775220,95775434,95775820,95779188,95779484,95779933,95781393,95785513,95785936,95787850,95788057,95788884,95789385,95790129,95792121,95792425,95792615,95796771,95797155,95797465,95797909,95803239,95803542,	Trpm4	2.2227	0.000505988	1.14579	0.421989	5.72836	1	1	0	0	0	1	0	0	0	0	0
ctrlafb_g1_1.3.0_00002100	chr1	-	95774816	95803551	95774816	95803551	23	95774816,95775302,95775624,95779011,95779310,95779801,95780971,95785436,95785824,95787705,95787928,95788756,95789044,95790017,95792022,95792234,95792554,95796588,95796992,95797285,95797735,95803169,95803473,	95775220,95775434,95775820,95779188,95779484,95779933,95781393,95785513,95785936,95787850,95788057,95788884,95789385,95790129,95792121,95792425,95792615,95796771,95797155,95797465,95797909,95803239,95803551,	Trpm4	2.14808	0.00126831	1.14579	0.409849	-1.87107	1	1	0	0	0	1	0	0	0	0	0
ctrlafb_g1_1.3.0_00002198	chr1	-	131383387	131394180	131383387	131394180	2	131383387,131391576,	131384751,131394180,	Not RefSeq	4.00033	1.21e-15	3.26802	0.000401849	2.79029	1	1	1	0	0	0	0	0	1	0	0
ctrlafb_g1_1.3.0_00002200	chr1	-	131383387	131395790	131383387	131395790	2	131383387,131395068,	131394021,131395790,	Not RefSeq	4.08111	2.06e-15	3.26802	0.000201288	3.85687	1	1	1	0	0	0	0	0	1	0	0
ctrlafb_g1_1.3.0_00002206	chr1	-	134851846	134859702	134851846	134859702	4	134851846,134853002,134856213,134859514,	134852306,134853304,134856581,134859702,	Hapln3	11.0268	4.02e-07	6.6608	0.00219124	3.56812	0.1169	1	1	0	0	0	0	0	1	0	0
ctrlafb_g1_1.3.0_00002259	chr1	-	138098818	138119696	138098818	138119696	5	138098818,138108447,138114111,138114718,138119619,	138100827,138108593,138114266,138114856,138119696,	Hdgfrp3	13.3878	8.68e-43	11.8334	0.00019992	17.7684	1	1	1	0	0	0	0	0	1	0	0
ctrlafb_g1_1.3.0_00002296	chr1	-	149685955	149710264	149685955	149710264	6	149685955,149689883,149690861,149701230,149709050,149710193,	149688728,149690000,149691022,149701358,149709133,149710264,	RGD1559690	7.19535	7.29e-14	8.08445	0.000199601	7.18598	0.000996405	1	1	1	1	0	0	0	0	0	0
ctrlafb_g1_1.3.0_00002536	chr1	-	186205162	186293437	186205162	186293437	14	186205162,186205389,186205528,186206343,186206761,186208388,186209967,186210220,186210498,186210804,186211215,186211567,186213286,186293360,	186205288,186205448,186205740,186206404,186206926,186208556,186210102,186210373,186210728,186211013,186211369,186211694,186213469,186293437,	Kif22	2.71508	2.58e-07	1.41921	0.155409	2.50869	1	1	0	0	0	1	0	0	0	0	0
ctrlafb_g1_1.3.0_00002569	chr1	-	187627556	187664323	187627556	187664323	5	187627556,187634775,187648009,187649192,187664232,	187627601,187634918,187648095,187649310,187664323,	Rgs10	2.65743	0.00107106	1.25443	0.354455	2.2544	0.327517	1	0	0	0	1	0	0	0	0	0
ctrlafb_g1_1.3.0_00002594	chr1	-	191510790	191624219	191510790	191624219	13	191510790,191515732,191516959,191522730,191525619,191527393,191529204,191539141,191546579,191575489,191596883,191612334,191623762,	191512116,191515831,191517098,191523027,191525798,191527589,191529327,191539229,191546730,191575629,191596992,191612432,191624219,	Cpxm2	6.2639	2.34e-07	4.11624	0.000403633	5.5629	0.012604	1	1	0	0	0	0	0	1	0	0
ctrlafb_g1_1.3.0_00002604	chr1	-	193083749	193098063	193083749	193098063	4	193083749,193090514,193091327,193097946,	193084233,193090594,193091458,193098063,	LOC499279	4.58344	1.22e-08	2.10006	0.0112495	0	1	1	0	0	0	1	0	0	0	0	0
ctrlafb_g1_1.3.0_00002665	chr1	-	202822925	202825601	202822925	202825601	5	202822925,202823627,202823833,202824044,202824260,	202823515,202823754,202823961,202824178,202825601,	H19	3.08371	0.00128136	1.33849	0.10651	2.72937	0.0634721	1	0	0	0	1	0	0	0	0	0
ctrlafb_g1_1.3.0_00002673	chr1	-	203835215	203837843	203835215	203837843	4	203835215,203836005,203836654,203837097,	203835914,203836143,203837046,203837843,	Cdkn1c	6.60089	6.45e-06	4.068	0.00040347	2.4955	1	1	1	0	0	0	0	0	1	0	0
ctrlafb_g1_1.3.0_00002674	chr1	-	203835215	203837843	203835215	203837843	4	203835215,203836005,203836690,203837097,	203835914,203836143,203837046,203837843,	Cdkn1c	6.54366	7.54e-06	4.068	0.00059453	-0.00505226	1	1	1	0	0	0	0	0	1	0	0
ctrlafb_g1_1.3.0_00002675	chr1	-	203835215	203837844	203835215	203837844	5	203835215,203836005,203836690,203837097,203837708,	203835914,203836143,203837046,203837571,203837844,	Cdkn1c	6.54366	7.54e-06	4.068	0.000397772	0	1	1	1	0	0	0	0	0	1	0	0
ctrlafb_g1_1.3.0_00002676	chr1	-	203835215	203837844	203835215	203837844	5	203835215,203836005,203836690,203837097,203837708,	203835909,203836143,203837046,203837571,203837844,	Cdkn1c	6.54366	7.54e-06	4.068	0.000795387	-0.0816965	1	1	1	0	0	0	0	0	1	0	0
ctrlafb_g1_1.3.0_00002717	chr1	-	206627398	206629866	206627398	206629866	7	206627398,206627809,206628636,206629068,206629254,206629551,206629796,	206627652,206627916,206628739,206629155,206629360,206629586,206629866,	Gstp1	79.9412	1.47e-11	35.8287	0.00020024	92.9396	0	1	1	1	1	0	0	0	0	0	0
ctrlafb_g1_1.3.0_00002730	chr1	-	206857232	206869455	206857232	206869455	15	206857232,206857848,206858020,206858278,206858500,206859599,206859827,206860088,206860573,206866875,206867276,206867502,206868256,206868501,206869221,	206857605,206857939,206858183,206858394,206858657,206859729,206859888,206860169,206860639,206867064,206867419,206867547,206868380,206868636,206869455,	Ankrd13d	4.07557	2.59e-06	2.75	0.0156123	5.44781	0.114652	1	0	0	0	1	0	0	0	0	0
ctrlafb_g1_1.3.0_00002771	chr1	-	208108632	208112020	208108632	208112020	10	208108632,208108945,208109220,208109454,208109661,208109819,208110013,208110499,208111320,208111935,	208108866,208109145,208109284,208109579,208109741,208109915,208110167,208110612,208111404,208112020,	Ctsw	4.09465	1.09e-05	1.16328	0.41246	4.96428	0.0171964	1	0	0	0	1	0	0	0	0	0
ctrlafb_g1_1.3.0_00002821	chr1	-	209602228	209608521	209602228	209608521	6	209602228,209603358,209603879,209604248,209604534,209608333,	209602617,209603497,209604065,209604408,209604660,209608521,	Kcnk4	9.84125	1.88e-05	2.20915	0.101589	0	1	1	0	0	0	1	0	0	0	0	0
ctrlafb_g1_1.3.0_00002919	chr1	-	219266098	219290311	219266098	219290311	9	219266098,219270213,219274019,219279276,219282501,219283588,219284686,219286260,219290197,	219269447,219270350,219274147,219279445,219282673,219283793,219284755,219286320,219290311,	Psat1	2.61923	2.19e-09	2.26015	0.00181892	2.82717	0.000533332	1	1	1	1	0	0	0	0	0	0
ctrlafb_g1_1.3.0_00002933	chr1	-	223822536	223875238	223822536	223875238	11	223822536,223833330,223850892,223852003,223856300,223857621,223858680,223861981,223863962,223870424,223875128,	223823080,223833494,223851076,223852015,223856415,223857749,223858742,223862111,223864102,223870528,223875238,	Aldh1a7	4.04586	1.21e-07	5.7777	0.000989903	4.44154	4.06305e-05	1	1	1	1	0	0	0	0	0	0
ctrlafb_g1_1.3.0_00002984	chr1	-	237985509	238017941	237985509	238017941	6	237985509,237989742,237991268,237992264,238003895,238017783,	237986292,237989840,237991345,237992371,238004086,238017941,	Ankrd22	4.20195	0.00232229	5.89083	0.000397693	6.02196	0.0542951	1	1	0	0	0	0	0	1	0	0
ctrlafb_g1_1.3.0_00003015	chr1	-	245685979	245718198	245685979	245718198	19	245685979,245688233,245689313,245691995,245692223,245694046,245696124,245697964,245699525,245700224,245701409,245704260,245704741,245708202,245708390,245709645,245715416,245716000,245718133,	245687065,245688328,245689499,245692116,245692418,245694183,245696344,245698057,245699598,245700368,245701533,245704350,245704899,245708306,245708539,245709859,245715531,245716066,245718198,	Aldh18a1	2.65033	5.08e-05	2.36511	0.0070042	0	1	1	0	0	0	1	0	0	0	0	0
ctrlafb_g1_1.3.0_00003160	chr1	+	26788964	26952013	26788964	26952013	7	26788964,26919013,26926116,26938763,26945027,26947658,26951311,	26789085,26919128,26926264,26938864,26945065,26947718,26952013,	Tpd52l1	3.29181	7.4e-05	2.03852	0.00601805	5.35187	1	1	0	0	0	1	0	0	0	0	0
ctrlafb_g1_1.3.0_00003198	chr1	+	72908421	72923290	72908421	72923290	2	72908421,72913688,	72912401,72923290,	Zbtb45	-2.07075	0.00268455	1.11913	0.217092	-1.5954	1	1	0	0	0	1	0	0	0	0	0
ctrlafb_g1_1.3.0_00003239	chr1	+	81348626	81359415	81348626	81359415	8	81348626,81348994,81351683,81352548,81353163,81354719,81355079,81358849,	81348840,81349143,81351843,81352724,81353304,81354906,81355220,81359415,	Cyp2b2	2.06547	0.000339085	1.63751	0.0166266	-1.04511	1	1	0	0	0	1	0	0	0	0	0
ctrlafb_g1_1.3.0_00003429	chr1	+	190378412	190693138	190378412	190693138	41	190378412,190382863,190383700,190386649,190388254,190389656,190392903,190393769,190397520,190399709,190400549,190404302,190405836,190416680,190428226,190497869,190508537,190509365,190542985,190546121,190546958,190556994,190560329,190567982,190648027,190648390,190651479,190652771,190653582,190663690,190664593,190665856,190667196,190668523,190670386,190671355,190672608,190673736,190688418,190690983…	190378488,190382889,190383729,190386681,190388287,190389981,190392929,190393798,190397552,190399735,190400578,190404334,190405870,190416782,190428550,190497877,190508554,190509394,190543017,190546147,190546987,190557319,190560355,190568008,190648056,190648421,190651803,190652800,190653617,190663719,190664741,190666064,190667519,190668552,190670406,190671505,190672816,190673920,190688806,190691254…	Dmbt1	2.14574	0.00108142	-1.61053	0.25132	-0.121446	1	1	0	0	0	1	0	0	0	0	0
ctrlafb_g1_1.3.0_00003554	chr1	+	241710875	241722847	241710875	241722847	7	241710875,241712787,241713413,241715644,241717806,241718814,241721345,	241711551,241712893,241713692,241715866,241717954,241718930,241722847,	Kif11	2.29405	5.65e-06	3.31895	0.00059964	-2.54451	0.507757	1	1	0	0	0	0	0	1	0	0
ctrlafb_g1_1.3.0_00003555	chr1	+	241715600	241722847	241715600	241722847	4	241715600,241717806,241718814,241721345,	241715866,241717954,241718930,241722847,	Kif11	2.44047	4.17e-06	3.31895	0.00120724	7.63289	0.236675	1	1	0	0	0	0	0	1	0	0
ctrlafb_g1_1.3.0_00003770	chr1	-	95081821	95144918	95081821	95144918	42	95081821,95082785,95084558,95087625,95089487,95089701,95090309,95091264,95092061,95095856,95097059,95098164,95098398,95099058,95099429,95101091,95103141,95103464,95103901,95104489,95105111,95105972,95106743,95107299,95107819,95108899,95113592,95114126,95114791,95115057,95116907,95119755,95127051,95128201,95129501,95129884,95131892,95132432,95132728,95135290,95140808,95144873,	95082500,95082957,95084666,95087833,95089610,95089789,95090437,95091425,95092273,95096068,95097307,95098316,95098502,95099264,95099573,95101303,95103312,95103587,95104038,95104695,95105242,95106080,95106903,95107368,95107940,95109086,95113706,95114299,95114964,95115209,95117025,95119850,95127191,95128299,95129564,95129976,95131915,95132534,95132755,95135446,95141203,95144918,	Myh14	2.17929	9.85e-05	1.89926	0.0424843	1.23634	1	1	0	0	0	1	0	0	0	0	0
ctrlafb_g1_1.3.0_00003971	chr1	-	206627398	206628517	206627398	206628517	2	206627398,206627809,	206627652,206628517,	Gstp1	68.0672	2.24e-10	25.3509	0.000201369	5.60673	0.0173075	1	1	0	0	0	0	0	1	0	0
ctrlafb_g1_1.3.0_00004056	chr1	-	243702488	243704436	243702488	243704436	2	243702488,243703923,	243702905,243704436,	Cyp2c7	-2.00389	7.48e-05	-1.09385	0.600556	-1.74895	1	1	0	0	0	1	0	0	0	0	0
ctrlafb_g1_1.3.0_00004061	chr1	-	245685979	245718248	245685979	245718248	18	245685979,245688233,245689313,245691995,245692223,245694046,245696124,245697964,245699525,245700224,245701409,245704260,245704741,245708202,245708390,245709645,245715416,245718133,	245687065,245688328,245689499,245692116,245692418,245694183,245696344,245698057,245699598,245700368,245701533,245704350,245704899,245708306,245708539,245709859,245715531,245718248,	Aldh18a1	2.65033	5.08e-05	2.36511	0.00580348	2.49029	0.0508313	1	0	0	0	1	0	0	0	0	0
ctrlafb_g1_1.3.0_00004156	chr1	+	72908733	72923290	72908733	72923290	2	72908733,72915636,	72914990,72923290,	Zbtb45	-2.10141	0.00159444	1.11913	0.226737	-1.94128	1	1	0	0	0	1	0	0	0	0	0
ctrlafb_g1_1.3.0_00004228	chr1	+	99562749	99577807	99562749	99577807	6	99562749,99563197,99565944,99574521,99576292,99577084,	99562909,99563392,99566051,99574658,99576353,99577807,	Htatip2	2.19343	0.000298645	1.67361	0.003365	1.81727	1	1	0	0	0	1	0	0	0	0	0
ctrlafb_g1_1.3.0_00004259	chr1	+	138088448	138099750	138088448	138099750	4	138088448,138090187,138090449,138097986,	138088623,138090279,138090568,138099750,	Tm6sf1	3.17122	1.06e-09	2.72873	0.00501605	4.14963	1	1	0	0	0	1	0	0	0	0	0
ctrlafb_g1_1.3.0_00004351	chr1	+	190378412	190693113	190378412	190693113	43	190378412,190382863,190383700,190386649,190388254,190389656,190392903,190393769,190397520,190399709,190400549,190404302,190407476,190421336,190423772,190424629,190425008,190428227,190497869,190508537,190509365,190542985,190546121,190546958,190556994,190560329,190567982,190648027,190648390,190652771,190653582,190663690,190664593,190665856,190667196,190668523,190670386,190671355,190672608,190673736…	190378488,190382889,190383729,190386681,190388287,190389981,190392929,190393798,190397552,190399735,190400578,190404334,190407799,190421362,190423798,190424658,190425040,190428550,190497877,190508554,190509394,190543017,190546147,190546987,190557319,190560355,190568008,190648056,190648422,190652800,190653617,190663719,190664741,190666064,190667519,190668552,190670406,190671505,190672816,190673920…	Dmbt1	2.1197	0.00121945	-1.61053	0.252705	-2.59802	1	1	0	0	0	1	0	0	0	0	0
ctrlafb_g1_1.3.0_00004432	chr1	+	238259441	238274983	238259441	238274983	8	238259441,238267385,238268546,238270598,238270815,238271313,238272190,238272890,	238259597,238267522,238268594,238270662,238270871,238271377,238272214,238274983,	Fas	2.01189	9.99e-05	2.17988	0.00120168	1.49059	0.644144	1	1	0	0	0	0	0	1	0	0
ctrlafb_g1_1.3.0_00004504	chr1	-	36492134	36495665	36492134	36495665	4	36492134,36493232,36494327,36494948,	36492910,36493399,36494417,36495665,	Fbxo5	2.02157	0.000584908	1.6495	0.0314263	-3.46515	0.998257	1	0	0	0	1	0	0	0	0	0
ctrlafb_g1_1.3.0_00004960	chr1	+	78444049	78445521	78444049	78445521	2	78444049,78444990,	78444363,78445521,	Not RefSeq	-2.68085	0.00136484	-1.20878	0.31746	-1.87457	0.411027	1	0	0	0	1	0	0	0	0	0
ctrlafb_g1_1.3.0_00005036	chr1	+	136112674	136133720	136112674	136133720	13	136112674,136118886,136119359,136122737,136124530,136124940,136125897,136127575,136128890,136129224,136129991,136130627,136132660,	136112802,136119018,136119481,136123238,136124679,136125087,136126033,136127670,136129036,136129334,136130101,136130726,136133720,	Prc1	2.74023	7e-08	-1.00232	0.74535	0	1	1	0	0	0	1	0	0	0	0	0
ctrlafb_g1_1.3.0_00005038	chr1	+	138089274	138099713	138089274	138099713	3	138089274,138090449,138097986,	138090279,138090568,138099713,	Tm6sf1	2.98348	2.87e-09	2.72873	0.00544135	-1.70674	1	1	0	0	0	1	0	0	0	0	0
ctrlafb_g1_1.3.0_00005115	chr1	+	190378412	190693131	190378412	190693131	38	190378412,190382863,190383700,190386649,190388254,190389656,190392903,190393769,190397520,190399709,190400549,190404302,190407476,190421336,190423772,190424629,190425008,190429527,190430333,190433485,190434843,190435471,190436348,190437595,190438931,190439564,190440458,190442115,190443447,190445093,190446481,190458435,190459894,190461021,190465821,190468389,190469983,190693116,	190378488,190382889,190383729,190386681,190388287,190389981,190392929,190393798,190397552,190399735,190400578,190404334,190407799,190421362,190423798,190424658,190425040,190429556,190430368,190433514,190434872,190435494,190436495,190437803,190438960,190439588,190440605,190442323,190443476,190445416,190446510,190458586,190460102,190461205,190466209,190468660,190470512,190693131,	Dmbt1	7.69962	6.42e-30	6.31282	0.000197472	-0.0448638	1	1	1	0	0	0	0	0	1	0	0
ctrlafb_g1_1.3.0_00005180	chr1	+	223772269	223773285	223772269	223773285	2	223772269,223772659,	223772306,223773285,	Aldh1a1	3.75954	7.46e-09	4.31435	0.000392157	3.833	8.9376e-09	1	1	1	1	0	0	0	0	0	0
ctrlafb_g1_1.3.0_00005238	chr1	+	267891629	267895020	267891629	267895020	7	267891629,267892548,267892807,267893100,267893605,267894115,267894612,	267892292,267892688,267892887,267893244,267893742,267894187,267895020,	LOC100365112	4.08282	1.45e-18	2.82176	0.00176783	1.63784	1	1	1	0	0	0	0	0	1	0	0
ctrlafb_g1_1.3.0_00005445	chr1	-	193083749	193111432	193083749	193111432	4	193083749,193090514,193091327,193111255,	193084233,193090594,193091458,193111432,	LOC499279	4.59523	3.22e-11	2.10006	0.00924105	4.28264	0.00959238	1	0	0	0	1	0	0	0	0	0
ctrlafb_g1_1.3.0_00005670	chr1	+	99562706	99577807	99562706	99577807	6	99562706,99563140,99565944,99574521,99576292,99577084,	99562741,99563392,99566051,99574658,99576353,99577807,	Htatip2	2.24503	0.000161046	1.67361	0.00421517	3.14819	1	1	0	0	0	1	0	0	0	0	0
ctrlafb_g1_1.3.0_00005689	chr1	+	146220187	146221089	146220187	146221089	2	146220187,146220880,	146220562,146221089,	Me3	-2.62303	0.000442727	-3.27576	0.000985999	-3.02137	1	1	1	0	0	0	0	0	1	0	0
ctrlafb_g1_1.3.0_00005776	chr1	+	190378412	190470538	190378412	190470538	35	190378412,190382863,190383700,190386649,190388254,190389656,190392903,190393769,190397520,190399709,190400549,190404302,190405836,190416680,190428226,190429527,190430333,190433485,190434843,190435471,190436348,190437595,190438931,190439564,190440458,190442115,190443447,190445093,190446481,190458435,190459894,190461021,190465821,190468389,190469983,	190378488,190382889,190383729,190386681,190388287,190389981,190392929,190393798,190397552,190399735,190400578,190404334,190405870,190416782,190428550,190429556,190430368,190433514,190434872,190435494,190436495,190437803,190438960,190439588,190440605,190442323,190443476,190445416,190446510,190458586,190460102,190461205,190466209,190468660,190470538,	Dmbt1	7.58994	1.37e-30	6.31282	0.000605571	13.7804	1	1	1	0	0	0	0	0	1	0	0
ctrlafb_g1_1.3.0_00005977	chr1	-	86113706	86117132	86113706	86117132	7	86113706,86114014,86114469,86114588,86115368,86115474,86117044,	86113882,86114051,86114505,86114662,86115391,86115506,86117132,	Fxyd3	2.52216	0.00352967	1.8519	0.0030036	5.73747	0.319577	1	0	0	0	1	0	0	0	0	0
ctrlafb_g1_1.3.0_00005993	chr1	-	95081821	95105331	95081821	95105331	21	95081821,95082785,95084558,95087625,95089487,95089701,95090309,95091264,95092061,95095856,95097059,95098164,95098398,95099058,95099429,95101091,95103141,95103464,95103901,95104489,95105111,	95082500,95082957,95084666,95087833,95089610,95089789,95090437,95091425,95092273,95096068,95097307,95098316,95098502,95099264,95099573,95101303,95103312,95103587,95104038,95104695,95105331,	Myh14	2.32186	0.000285223	1.60716	0.00761218	3.68475	1	1	0	0	0	1	0	0	0	0	0
ctrlafb_g1_1.3.0_00005994	chr1	-	95081821	95146449	95081821	95146449	42	95081821,95082785,95084558,95087625,95089487,95089701,95090309,95091264,95092061,95095856,95097059,95098164,95098398,95099058,95099421,95101091,95103141,95103464,95103901,95104489,95105111,95105972,95106743,95107299,95107819,95108899,95113592,95114126,95114791,95115057,95116907,95119755,95127051,95128201,95129501,95129884,95131892,95132432,95132728,95135290,95140808,95146412,	95082500,95082957,95084666,95087833,95089610,95089789,95090437,95091425,95092273,95096068,95097307,95098316,95098502,95099256,95099573,95101303,95103312,95103587,95104038,95104695,95105242,95106080,95106903,95107368,95107940,95109086,95113706,95114299,95114964,95115209,95117025,95119850,95127191,95128299,95129564,95129976,95131915,95132534,95132755,95135446,95141203,95146449,	Myh14	2.17922	0.000106872	1.89926	0.0385083	0	1	1	0	0	0	1	0	0	0	0	0
ctrlafb_g1_1.3.0_00006021	chr1	-	98640548	98641890	98640548	98641890	2	98640548,98641609,	98641174,98641890,	Not RefSeq	4.82895	0.000295296	2.41597	0.0163736	8.29391	0.0404473	1	0	0	0	1	0	0	0	0	0
ctrlafb_g1_1.3.0_00006030	chr1	-	131382577	131396312	131382577	131396312	2	131382577,131396134,	131395199,131396312,	Not RefSeq	4.11439	4.03e-16	4.36165	0.000201207	4.48824	1	1	1	0	0	0	0	0	1	0	0
ctrlafb_g1_1.3.0_00006120	chr1	-	203835215	203837887	203835215	203837887	5	203835215,203836005,203836654,203837097,203837708,	203835914,203836143,203837046,203837571,203837887,	Cdkn1c	6.60089	6.45e-06	4.068	0.000597848	0.819489	1	1	1	0	0	0	0	0	1	0	0
ctrlafb_g1_1.3.0_00006121	chr1	-	204033167	204037762	204033167	204037762	4	204033167,204034481,204035379,204037688,	204033631,204034563,204035490,204037762,	Not RefSeq	4.19768	0.000840668	1.33073	0.431534	2.98718	0.289911	1	0	0	0	1	0	0	0	0	0
ctrlafb_g1_1.3.0_00006132	chr1	-	206627427	206628860	206627427	206628860	3	206627427,206627809,206628636,	206627652,206627916,206628860,	Gstp1	78.6859	3.69e-11	25.3509	0.00020004	42.42	2.91954e-09	1	1	1	1	0	0	0	0	0	0
ctrlafb_g1_1.3.0_00006138	chr1	-	206857040	206861114	206857040	206861114	8	206857040,206857848,206858020,206858278,206858500,206859599,206859827,206860088,	206857605,206857939,206858183,206858394,206858657,206859729,206859888,206861114,	Ankrd13d	3.11854	0.000114221	2.75	0.0137795	1.77322	0.526376	1	0	0	0	1	0	0	0	0	0
ctrlafb_g1_1.3.0_00006181	chr1	-	223861921	223875238	223861921	223875238	4	223861921,223863962,223870424,223875128,	223862111,223864102,223870528,223875238,	Aldh1a7	3.53583	2.17e-06	1.20945	0.587856	3.46591	2.31938e-06	1	0	1	0	0	0	0	0	1	0
ctrlafb_g1_1.3.0_00006256	chr1	+	26788962	26951873	26788962	26951873	6	26788962,26919013,26926116,26938763,26947658,26951311,	26789085,26919128,26926264,26938864,26947718,26951873,	Tpd52l1	3.41037	6.59e-05	2.03852	0.00576426	3.73734	1	1	0	0	0	1	0	0	0	0	0
ctrlafb_g1_1.3.0_00006262	chr1	+	30165330	30184373	30165330	30184373	13	30165330,30166506,30168803,30171676,30172265,30173982,30176238,30177082,30177420,30178918,30181264,30182211,30183442,	30165532,30166671,30168932,30171731,30172355,30174054,30176301,30177168,30177526,30179071,30181376,30182280,30184373,	Trip13	3.32552	7.64e-05	3.26949	0.00121877	2.63302	0.154409	1	1	0	0	0	0	0	1	0	0
ctrlafb_g1_1.3.0_00006381	chr1	+	190378412	190693131	190378412	190693131	35	190378412,190382863,190383700,190386649,190388254,190389656,190392903,190393769,190397520,190399709,190400549,190404302,190407476,190421336,190423772,190424629,190425008,190428227,190429527,190430333,190433485,190434843,190435471,190436348,190437595,190443447,190445093,190446481,190458435,190459894,190461021,190465821,190468389,190469983,190693116,	190378488,190382889,190383729,190386681,190388287,190389981,190392929,190393798,190397552,190399735,190400578,190404334,190407799,190421362,190423798,190424658,190425040,190428550,190429556,190430368,190433514,190434872,190435494,190436495,190437803,190443476,190445416,190446510,190458586,190460102,190461205,190466209,190468660,190470512,190693131,	Dmbt1	7.60389	1.58e-31	6.31282	0.000203046	6.56536	1	1	1	0	0	0	0	0	1	0	0
ctrlafb_g1_1.3.0_00006438	chr1	+	230666736	230698267	230666736	230698267	18	230666736,230679433,230683747,230685189,230686923,230687380,230687596,230688295,230688518,230689128,230689873,230691538,230692215,230692659,230694006,230695455,230696304,230697569,	230667000,230679552,230683869,230685311,230687294,230687502,230687718,230688414,230688643,230689299,230690091,230691656,230692354,230692800,230694152,230695535,230696473,230698267,	Vldlr	2.89735	0.000501747	1.50233	0.133655	5.65712	0.156977	1	0	0	0	1	0	0	0	0	0
ctrlafb_g1_1.3.0_00006562	chr1	-	95081948	95119889	95081948	95119889	32	95081948,95082785,95084558,95087625,95089487,95089701,95090309,95091264,95092061,95095856,95097059,95098164,95098398,95099058,95099429,95101091,95103141,95103464,95103901,95104489,95105111,95105972,95106743,95107299,95107819,95108899,95113592,95114126,95114791,95115057,95116907,95119755,	95082500,95082957,95084666,95087833,95089610,95089789,95090437,95091425,95092273,95096068,95097307,95098316,95098502,95099264,95099573,95101303,95103312,95103587,95104038,95104695,95105242,95106080,95106903,95107368,95107940,95109086,95113706,95114299,95114964,95115209,95117025,95119889,	Myh14	2.2463	6.65e-05	1.60716	0.00761218	3.45408	1	1	0	0	0	1	0	0	0	0	0
ctrlafb_g1_1.3.0_00006594	chr1	-	131382574	131396316	131382574	131396316	3	131382574,131395068,131396134,	131391710,131395199,131396316,	Not RefSeq	4.11857	3.79e-20	5.69737	0.000199164	6.83157	1	1	1	0	0	0	0	0	1	0	0
ctrlafb_g1_1.3.0_00006595	chr1	-	131382574	131397422	131382574	131397422	4	131382574,131391576,131395068,131397385,	131384751,131391705,131395199,131397422,	Not RefSeq	4.06926	1.26e-33	5.78059	0.000203169	-0.651672	1	1	1	0	0	0	0	0	1	0	0
ctrlafb_g1_1.3.0_00006605	chr1	-	140200388	140220767	140200388	140220767	9	140200388,140204788,140209548,140211147,140211408,140214625,140216044,140219168,140220587,	140203167,140204888,140209705,140211233,140211612,140214810,140216255,140219383,140220767,	Not RefSeq	5.28198	1.82e-09	1.36657	0.148052	5.28465	0.000207991	1	0	1	0	0	0	0	0	1	0
ctrlafb_g1_1.3.0_00006662	chr1	-	193083749	193099245	193083749	193099245	4	193083749,193090514,193091327,193099016,	193084233,193090594,193091458,193099245,	LOC499279	4.42351	1.04e-08	2.10006	0.0115128	1.77457	0.736848	1	0	0	0	1	0	0	0	0	0
ctrlafb_g1_1.3.0_00006665	chr1	-	199780083	199781953	199780083	199781953	3	199780083,199781002,199781918,	199780597,199781076,199781953,	Not RefSeq	140.437	2.36e-76	144.41	0.000199124	127.29	7.26569e-05	1	1	1	1	0	0	0	0	0	0
ctrlafb_g1_1.3.0_00006729	chr1	-	223850949	223879812	223850949	223879812	9	223850949,223856302,223857621,223858680,223861981,223863962,223870424,223875128,223879780,	223851076,223856415,223857749,223858742,223862111,223864102,223870528,223875207,223879812,	Aldh1a7	3.80054	1.1e-07	1.2843	0.501305	6.64449	0.00562295	1	0	0	0	1	0	0	0	0	0
ctrlafb_g1_1.3.0_00006843	chr1	+	81345425	81359415	81345425	81359415	9	81345425,81348678,81348994,81351683,81352548,81353163,81354719,81355079,81358849,	81345595,81348840,81349143,81351843,81352724,81353304,81354906,81355220,81359415,	Cyp2b2	2.06522	0.00032588	1.63751	0.0196773	8.53887	1	1	0	0	0	1	0	0	0	0	0
ctrlafb_g1_1.3.0_00006894	chr1	+	138071973	138099992	138071973	138099992	10	138071973,138075826,138077934,138083320,138085754,138086407,138088519,138090187,138090449,138097986,	138072135,138075929,138078031,138083423,138085836,138086528,138088623,138090279,138090568,138099992,	Tm6sf1	3.25501	5.45e-12	3.235	0.00435299	4.36952	1	1	1	0	0	0	0	0	1	0	0
ctrlafb_g1_1.3.0_00006896	chr1	+	146220149	146419707	146220149	146419707	14	146220149,146220880,146313735,146317553,146354410,146364492,146373600,146397542,146416334,146416722,146418017,146418494,146419174,146419547,	146220562,146221077,146313868,146317702,146354485,146364653,146373703,146397651,146416431,146416835,146418122,146418636,146419347,146419707,	Me3	-2.63118	0.00034531	-3.27576	0.00118273	-3.52026	1	1	1	0	0	0	0	0	1	0	0
ctrlafb_g1_1.3.0_00006966	chr1	+	190439645	190693113	190439645	190693113	12	190439645,190442115,190443447,190445093,190446481,190458435,190459894,190461021,190673849,190688418,190690983,190692585,	190440605,190442323,190443476,190445416,190446510,190458586,190460102,190461132,190673920,190688806,190691254,190693113,	Dmbt1	4.08145	1.09e-10	-1.61053	0.255627	3.83386	1	1	0	0	0	1	0	0	0	0	0
ctrlafb_g1_1.3.0_00007035	chr1	+	238892139	238947678	238892139	238947678	32	238892139,238893865,238897103,238897269,238898168,238900611,238904500,238904966,238905698,238906835,238906991,238907878,238908766,238910101,238910396,238911666,238914865,238919601,238922306,238924018,238925129,238926973,238928357,238929845,238932377,238937091,238938980,238940800,238943309,238943769,238945640,238947423,	238892208,238894012,238897189,238897385,238898306,238900795,238904536,238905190,238905809,238906906,238907137,238908040,238909053,238910240,238910537,238911774,238914899,238919742,238923536,238924156,238925248,238927033,238928482,238929972,238932532,238937267,238939090,238940997,238943410,238943919,238945782,238947678,	Kif20b	2.08383	9.65e-05	3.62179	0.00217048	2.74066	0.0214071	1	1	0	0	0	0	0	1	0	0
ctrlafb_g1_1.3.0_00007037	chr1	+	238929847	238947678	238929847	238947678	9	238929847,238932377,238937091,238938980,238940800,238943309,238943769,238945640,238947423,	238929972,238932532,238937285,238939090,238940997,238943410,238943919,238945782,238947678,	Kif20b	2.58464	0.000107255	3.62179	0.001415	1.685	0.700894	1	1	0	0	0	0	0	1	0	0
ctrlafb_g1_1.3.0_00007067	chr1	+	264103831	264488698	264103831	264488698	5	264103831,264138209,264290197,264398411,264486188,	264103888,264138287,264290304,264398525,264488698,	Not RefSeq	2.02204	0.000424866	1.90171	0.00080016	1.19652	1	1	0	0	0	1	0	0	0	0	0
ctrlafb_g1_1.3.0_00007177	chr1	-	95773459	95803547	95773459	95803547	23	95773459,95774952,95775624,95779011,95779310,95779801,95780971,95785436,95785824,95787705,95787928,95788756,95789044,95790017,95792022,95792234,95792554,95796588,95796992,95797285,95797735,95803169,95803473,	95774019,95775434,95775820,95779188,95779484,95779933,95781393,95785513,95785936,95787850,95788057,95788884,95789385,95790129,95792121,95792425,95792615,95796771,95797155,95797465,95797909,95803239,95803547,	Trpm4	2.21335	0.000504384	1.14579	0.416397	0.105311	1	1	0	0	0	1	0	0	0	0	0
ctrlafb_g1_1.3.0_00007266	chr1	-	186205463	186293437	186205463	186293437	12	186205463,186206343,186206761,186208388,186209967,186210220,186210498,186210804,186211215,186211567,186213286,186293360,	186205740,186206404,186206926,186208556,186210102,186210373,186210728,186211013,186211369,186211694,186213469,186293437,	Kif22	2.68782	3.2e-07	-1.60898	0.027589	0.304654	1	1	0	0	0	1	0	0	0	0	0
ctrlafb_g1_1.3.0_00007287	chr1	-	199777735	199791116	199777735	199791116	24	199777735,199778206,199779097,199781002,199782139,199782448,199782986,199785269,199785893,199786332,199786793,199787208,199787363,199787660,199788027,199788287,199788505,199788753,199789130,199789279,199789575,199790074,199790228,199790449,	199777794,199778335,199780600,199781076,199782189,199782513,199783145,199785383,199785974,199786409,199786958,199787283,199787552,199787749,199788204,199788435,199788586,199788919,199789198,199789341,199789758,199790150,199790306,199791116,	Not RefSeq	150.802	2.35e-90	114.042	0.000200763	0	1	1	1	0	0	0	0	0	1	0	0
ctrlafb_g1_1.3.0_00007288	chr1	-	199777735	199791116	199777735	199791116	22	199777735,199778206,199779097,199781002,199782139,199782448,199782986,199785269,199786332,199786793,199787208,199787363,199787660,199788287,199788505,199788753,199789130,199789279,199789575,199790074,199790228,199790449,	199777794,199778335,199780600,199781076,199782189,199782513,199783145,199785974,199786409,199786958,199787283,199787552,199788204,199788435,199788586,199788919,199789198,199789341,199789758,199790150,199790306,199791116,	Not RefSeq	142.016	2.84e-92	114.042	0.000202881	50.1888	3.48197e-08	1	1	1	1	0	0	0	0	0	0
ctrlafb_g1_1.3.0_00007298	chr1	-	203835215	203837844	203835215	203837844	5	203835215,203836005,203836690,203837097,203837708,	203835914,203836143,203837046,203837530,203837844,	Cdkn1c	6.58063	7.24e-06	4.068	0.000602773	7.52287	1	1	1	0	0	0	0	0	1	0	0
ctrlafb_g1_1.3.0_00007302	chr1	-	204034515	204037795	204034515	204037795	3	204034515,204035379,204037688,	204034563,204035490,204037795,	Not RefSeq	6.49441	0.000467568	1.33073	0.424386	7.797	0.135508	1	0	0	0	1	0	0	0	0	0
ctrlafb_g1_1.3.0_00007343	chr1	-	209601942	209608521	209601942	209608521	6	209601942,209603174,209603879,209604248,209604534,209608333,	209602617,209603497,209604065,209604408,209604660,209608521,	Kcnk4	19.4504	4.83e-10	2.20915	0.101321	0.269212	0.115813	1	0	0	0	1	0	0	0	0	0
ctrlafb_g1_1.3.0_00007445	chr1	+	72908733	72923290	72908733	72923290	2	72908733,72913688,	72912271,72923290,	Zbtb45	-2.07444	0.00277994	1.11913	0.207444	-2.27325	1	1	0	0	0	1	0	0	0	0	0
ctrlafb_g1_1.3.0_00007465	chr1	+	81283841	81359415	81283841	81359415	5	81283841,81353166,81354719,81355079,81358849,	81283863,81353304,81354906,81355220,81359415,	Cyp2b2	2.07416	0.00023838	1.40977	0.0196195	1.97493	1	1	0	0	0	1	0	0	0	0	0
ctrlafb_g1_1.3.0_00007494	chr1	+	146220147	146422758	146220147	146422758	14	146220147,146313735,146317553,146354410,146364492,146373600,146397542,146416334,146416722,146418017,146418494,146419174,146419547,146422425,	146221077,146313868,146317702,146354485,146364653,146373703,146397651,146416431,146416835,146418122,146418636,146419347,146419648,146422758,	Me3	-2.69819	0.000327836	-2.91031	0.00185109	-4.39244	1	1	1	0	0	0	0	0	1	0	0
ctrlafb_g1_1.3.0_00007593	chr1	+	238892139	238947678	238892139	238947678	32	238892139,238893865,238897103,238897269,238898168,238900611,238904500,238904966,238905698,238906835,238906991,238907878,238908766,238910101,238910396,238911666,238914865,238919601,238922306,238924018,238925129,238926973,238928357,238929845,238932377,238937091,238938980,238940800,238943309,238943769,238945640,238947423,	238892204,238894012,238897189,238897385,238898306,238900795,238904536,238905190,238905809,238906906,238907137,238908040,238909053,238910240,238910537,238911774,238914899,238919742,238923536,238924156,238925248,238927033,238928482,238929972,238932532,238937267,238939090,238940997,238943410,238943919,238945782,238947678,	Kif20b	2.08383	9.65e-05	3.62179	0.00259896	0	1	1	1	0	0	0	0	0	1	0	0
ctrlafb_g1_1.3.0_00007682	chr1	-	95773485	95785575	95773485	95785575	10	95773485,95774952,95775148,95775302,95775624,95779011,95779310,95779801,95780971,95785436,	95774019,95775057,95775220,95775434,95775820,95779188,95779484,95779933,95781393,95785575,	Trpm4	2.4314	0.00199262	1.14579	0.419822	1.35485	1	1	0	0	0	1	0	0	0	0	0
ctrlafb_g1_1.3.0_00007698	chr1	-	131382574	131396329	131382574	131396329	4	131382574,131391576,131395068,131396134,	131384768,131391705,131395199,131396329,	Not RefSeq	4.08104	8.18e-34	5.78059	0.000197746	6.24993	1	1	1	0	0	0	0	0	1	0	0
ctrlafb_g1_1.3.0_00007699	chr1	-	131382574	131396329	131382574	131396329	3	131382574,131395068,131396134,	131394021,131395199,131396329,	Not RefSeq	4.1188	5.26e-17	4.36165	0.000202061	6.213	1	1	1	0	0	0	0	0	1	0	0
ctrlafb_g1_1.3.0_00007750	chr1	-	199779993	199785551	199779993	199785551	6	199779993,199781002,199782139,199782448,199782986,199785269,	199780597,199781076,199782189,199782513,199783145,199785551,	Not RefSeq	151.885	1.61e-75	114.042	0.000196928	71.6558	0.0354986	1	1	0	0	0	0	0	1	0	0
ctrlafb_g1_1.3.0_00007751	chr1	-	199779993	199792772	199779993	199792772	23	199779993,199781002,199782139,199782448,199782986,199785269,199785893,199786332,199786793,199787208,199787363,199787660,199788027,199788287,199788505,199788753,199789130,199789279,199789575,199790074,199790228,199790449,199792686,	199780600,199781076,199782189,199782513,199783145,199785383,199785974,199786409,199786958,199787283,199787552,199787749,199788204,199788435,199788586,199788919,199789198,199789341,199789758,199790150,199790306,199790525,199792772,	Not RefSeq	156.469	1.74e-89	114.042	0.000201735	259.829	3.44559e-09	1	1	1	1	0	0	0	0	0	0
ctrlafb_g1_1.3.0_00007759	chr1	-	203835215	203837887	203835215	203837887	5	203835215,203836005,203836690,203837097,203837708,	203835914,203836143,203837046,203837533,203837887,	Cdkn1c	6.58063	7.24e-06	4.068	0.000796178	3.73515	1	1	1	0	0	0	0	0	1	0	0
ctrlafb_g1_1.3.0_00007780	chr1	-	209600964	209603255	209600964	209603255	2	209600964,209603174,	209602617,209603255,	Kcnk4	137.345	5.55e-15	2.20915	0.0974874	11.3208	0.089624	1	0	0	0	1	0	0	0	0	0
ctrlafb_g1_1.3.0_00007899	chr10	+	12867725	12877688	12867725	12877688	6	12867725,12872748,12874117,12874575,12874788,12875951,	12867893,12873202,12874378,12874639,12874845,12877688,	Zscan10	7.82611	0.00182025	-1.05283	0.938886	4.8686	0.122203	1	0	0	0	1	0	0	0	0	0
ctrlafb_g1_1.3.0_00007903	chr10	+	12944503	12947271	12944503	12947271	2	12944503,12945843,	12944617,12947271,	Cldn6	4.51921	0.00254724	-1.34959	0.584868	-27.4815	0.998907	1	0	0	0	1	0	0	0	0	0
ctrlafb_g1_1.3.0_00008027	chr10	+	31892072	31923561	31892072	31923561	7	31892072,31897525,31899590,31902070,31902468,31920603,31923554,	31892135,31897866,31899883,31902153,31902521,31920658,31923561,	Not RefSeq	-2.97993	0.00043649	-4.06778	0.00847792	-0.300727	1	1	0	0	0	1	0	0	0	0	0
ctrlafb_g1_1.3.0_00008158	chr10	+	47365195	47374880	47365195	47374880	11	47365195,47368559,47369936,47370656,47370990,47371922,47372769,47373563,47374138,47374455,47374679,	47365355,47368725,47370167,47370741,47371198,47372039,47372910,47373729,47374237,47374585,47374880,	Aldh3a1	302.057	1.1e-12	2.71119	0.00866586	7.84264	6.61337e-06	1	0	1	0	0	0	0	0	1	0
ctrlafb_g1_1.3.0_00008172	chr10	+	48987004	49009691	48987004	49009691	6	48987004,48995973,49000631,49003328,49003874,49007009,	48987539,48996068,49000864,49003493,49003969,49009691,	Trim16	19.7425	4.55e-05	1.27164	0.396727	8.34592	0.0173964	1	0	0	0	1	0	0	0	0	0
ctrlafb_g1_1.3.0_00008201	chr10	+	55445288	55576096	55445288	55576096	41	55445288,55452823,55474231,55487988,55501417,55507823,55518898,55519730,55521745,55522068,55523445,55524223,55528818,55531090,55532033,55543415,55543694,55545292,55545573,55546038,55546236,55548574,55551125,55551664,55552956,55554070,55557909,55558868,55561392,55562114,55562636,55563348,55564896,55565884,55568581,55569974,55570729,55570929,55572117,55573672,55574439,	55445444,55453198,55474387,55488015,55501519,55507915,55518961,55519828,55521888,55522163,55523563,55524375,55528991,55531263,55532147,55543608,55543815,55545361,55545733,55546146,55546367,55548780,55551262,55551787,55553127,55554282,55558053,55559074,55561496,55562266,55562884,55563560,55565108,55566045,55568709,55570062,55570852,55571137,55572225,55573844,55576096,	Myh10	2.68674	2.19e-13	1.34201	0.0372233	2.91188	1	1	0	0	0	1	0	0	0	0	0
ctrlafb_g1_1.3.0_00008202	chr10	+	55573366	55576096	55573366	55576096	2	55573366,55574439,	55573844,55576096,	Myh10	2.23606	2.06e-06	1.71718	0.000409417	-4.50202	1	1	0	0	0	1	0	0	0	0	0
ctrlafb_g1_1.3.0_00008208	chr10	+	55798710	55804367	55798710	55804367	9	55798710,55798992,55800557,55800737,55800936,55801313,55801534,55802849,55803611,	55798867,55799065,55800659,55800800,55801127,55801451,55801682,55803023,55804367,	Aurkb	3.42369	1.17e-09	2.61757	0.00404694	2.78754	0.0298957	1	1	0	0	0	0	0	1	0	0
ctrlafb_g1_1.3.0_00008250	chr10	+	56998778	57002953	56998778	57002953	10	56998778,56999915,57000664,57001219,57001400,57001551,57001875,57002056,57002284,57002541,	56998962,57000107,57000774,57001314,57001471,57001622,57001961,57002207,57002390,57002953,	Clec10a	2.1454	0.00317036	1.45353	0.00896772	2.57457	0.30921	1	0	0	0	1	0	0	0	0	0
ctrlafb_g1_1.3.0_00008303	chr10	+	59889933	59904984	59889933	59904984	12	59889933,59897980,59898289,59898754,59899009,59899409,59899728,59902270,59902729,59903190,59903606,59903850,	59890270,59898127,59898360,59898823,59899105,59899489,59899869,59902397,59902819,59903255,59903707,59904984,	P2rx1	4.01488	0.000251473	1.22197	0.0903831	-1.1795	1	1	0	0	0	1	0	0	0	0	0
ctrlafb_g1_1.3.0_00008304	chr10	+	59889908	59904984	59889908	59904984	12	59889908,59897980,59898289,59898754,59899009,59899409,59899744,59902270,59902729,59903190,59903606,59903850,	59890270,59898127,59898360,59898823,59899105,59899424,59899869,59902397,59902819,59903255,59903707,59904984,	P2rx1	3.97474	0.000289281	1.22197	0.0929177	0.36608	1	1	0	0	0	1	0	0	0	0	0
ctrlafb_g1_1.3.0_00008449	chr10	+	75404911	75506807	75404911	75506807	25	75404911,75405223,75407970,75413136,75415597,75417748,75420070,75423555,75426107,75435976,75439985,75442840,75449027,75458639,75462827,75463492,75465180,75467608,75475944,75480157,75484958,75485810,75493965,75503833,75505571,	75405179,75405293,75408071,75413176,75415713,75417835,75420192,75423678,75426174,75436100,75440035,75442921,75449103,75458818,75462941,75463710,75465316,75467693,75476138,75480465,75485080,75485999,75494083,75503943,75506807,	Trim37	2.00538	1.04e-07	1.91076	0.0093801	-0.543111	1	1	0	0	0	1	0	0	0	0	0
ctrlafb_g1_1.3.0_00008450	chr10	+	75404911	75537072	75404911	75537072	26	75404911,75405223,75407970,75413136,75415597,75417748,75420070,75423555,75426107,75435976,75439985,75442840,75449027,75458639,75462827,75463492,75465180,75467608,75475944,75480157,75484958,75485810,75493965,75503833,75505571,75536785,	75405179,75405293,75408071,75413176,75415713,75417835,75420192,75423678,75426174,75436100,75440035,75442921,75449103,75458818,75462941,75463710,75465316,75467693,75476138,75480465,75485080,75485999,75494083,75503943,75505649,75537072,	Trim37	2.08147	7.59e-08	2.20963	0.00235803	-9.68401e-05	1	1	1	0	0	0	0	0	1	0	0
ctrlafb_g1_1.3.0_00008476	chr10	+	78664115	78692402	78664115	78692402	7	78664115,78671708,78673839,78678245,78679816,78681283,78690466,	78664329,78671789,78673999,78678319,78679917,78681352,78692402,	Mmd	15.8561	2.15e-08	3.12734	0.0026412	1.36407e+06	0.998657	1	1	0	0	0	0	0	1	0	0
ctrlafb_g1_1.3.0_00008540	chr10	+	87121889	87131587	87121889	87131587	7	87121889,87123765,87124055,87124386,87129147,87130627,87130834,	87122392,87123825,87124077,87124461,87129350,87130749,87131587,	Ppp1r1b	4.7503	5.26e-06	1.05683	0.901066	4.836	0.0233475	1	0	0	0	1	0	0	0	0	0
ctrlafb_g1_1.3.0_00008989	chr10	-	25732504	25762883	25732504	25762883	17	25732504,25734220,25739179,25739373,25739830,25741313,25744307,25745704,25746260,25747208,25753621,25753811,25755245,25755288,25756585,25760421,25762754,	25733514,25734383,25739278,25739525,25739976,25741429,25744521,25745852,25746435,25747271,25753721,25753897,25755263,25755441,25756632,25760502,25762883,	Hmmr	2.82901	0.000109867	2.05667	0.022177	2.86793	1	1	0	0	0	1	0	0	0	0	0
ctrlafb_g1_1.3.0_00008990	chr10	-	25739130	25744675	25739130	25744675	5	25739130,25739373,25739830,25741313,25744307,	25739278,25739525,25739976,25741429,25744675,	Hmmr	3.29666	5.81e-05	1.02265	0.370771	1.37818	1	1	0	0	0	1	0	0	0	0	0
ctrlafb_g1_1.3.0_00008991	chr10	-	25776380	25782754	25776380	25782754	6	25776380,25778869,25779052,25779647,25781384,25782524,	25778653,25778967,25779130,25779900,25781644,25782754,	Ccng1	3.42816	8.82e-27	3.60943	0.000198926	3.5146	1	1	1	0	0	0	0	0	1	0	0
ctrlafb_g1_1.3.0_00008995	chr10	-	28527410	28532831	28527410	28532831	5	28527410,28528255,28529485,28531459,28532464,	28527565,28528413,28529578,28531637,28532831,	Pttg1	3.31798	1.13e-07	-1.06206	0.823742	-5.41108	0.563529	1	0	0	0	1	0	0	0	0	0
ctrlafb_g1_1.3.0_00008996	chr10	-	28527410	28533107	28527410	28533107	6	28527410,28528255,28529485,28531459,28532464,28533079,	28527565,28528413,28529578,28531637,28532560,28533107,	Pttg1	3.45735	7.51e-08	-1.06206	0.838244	2.9799	0.0738455	1	0	0	0	1	0	0	0	0	0
ctrlafb_g1_1.3.0_00009311	chr10	-	63382327	63390679	63382327	63390679	3	63382327,63387951,63390350,	63385345,63388060,63390679,	Fam101b	2.3255	6.53e-05	1.58608	0.0116983	2.44121	0.0549081	1	0	0	0	1	0	0	0	0	0
ctrlafb_g1_1.3.0_00009324	chr10	-	64313146	64330975	64313146	64330975	25	64313146,64313786,64313974,64314129,64314440,64314901,64315106,64315487,64315784,64319894,64320166,64320553,64320735,64321056,64321412,64321612,64321953,64322243,64322447,64322702,64327256,64327538,64328243,64330556,64330867,	64313458,64313866,64314048,64314284,64314520,64315012,64315226,64315573,64315895,64320035,64320299,64320655,64320882,64321149,64321525,64321704,64322072,64322377,64322539,64322776,64327433,64328184,64328527,64330678,64330975,	Spag5	2.47149	9.72e-05	3.57531	0.0009996	2.30332	0.126286	1	1	0	0	0	0	0	1	0	0
ctrlafb_g1_1.3.0_00009427	chr10	-	75362906	75382514	75362906	75382514	10	75362906,75367469,75367644,75368793,75370736,75373022,75376487,75376840,75379728,75382462,	75363276,75367565,75367703,75368908,75370834,75373285,75376609,75376990,75379860,75382514,	Prr11	3.3023	4.08e-06	-1.03433	0.211488	2.48152	0.366401	1	0	0	0	1	0	0	0	0	0
ctrlafb_g1_1.3.0_00009431	chr10	-	76099137	76118724	76099137	76118724	13	76099137,76099965,76102012,76103012,76106861,76107473,76109181,76110077,76110504,76111244,76113762,76115008,76118374,	76099784,76100206,76102185,76103264,76107021,76107797,76109387,76110206,76110621,76111398,76113849,76115085,76118724,	Lpo	-36.7377	7.03e-08	-1.32007	0.218649	1.25149e-06	0.49998	1	0	0	0	1	0	0	0	0	0
ctrlafb_g1_1.3.0_00009459	chr10	-	82986552	83030799	82986552	83030799	30	82986552,82990929,82991801,82992070,82994443,82996417,82996611,82998243,82998718,82999007,82999307,83000397,83000869,83003357,83003621,83003963,83004282,83004695,83004947,83006834,83007307,83007566,83010785,83012077,83012870,83013115,83014074,83014424,83014881,83030707,	82987216,82991095,82991959,82992216,82994544,82996544,82996781,82998553,82998925,82999154,82999418,83000577,83001036,83003533,83003747,83004029,83004369,83004841,83005150,83006926,83007468,83007743,83010973,83012208,83012931,83013240,83014211,83014549,83015057,83030799,	Abcc3	13.937	5.53e-77	12.159	0.000403877	3.19575	1	1	1	0	0	0	0	0	1	0	0
ctrlafb_g1_1.3.0_00009525	chr10	-	87540868	87548516	87540868	87548516	7	87540868,87543023,87543504,87544429,87544667,87545021,87547946,	87542559,87543208,87544147,87544573,87544755,87545359,87548516,	Nr1d1	3.05858	0.00158256	1.10587	0.520578	3.00359	1	1	0	0	0	1	0	0	0	0	0
ctrlafb_g1_1.3.0_00009526	chr10	-	87541246	87546101	87541246	87546101	8	87541246,87542349,87543023,87543504,87544429,87544667,87545021,87545891,	87541728,87542559,87543208,87544147,87544573,87544755,87545359,87546101,	Nr1d1	3.39722	0.00140491	1.3245	0.484145	0	1	1	0	0	0	1	0	0	0	0	0
ctrlafb_g1_1.3.0_00009527	chr10	-	87541246	87548186	87541246	87548186	8	87541246,87542349,87543023,87543504,87544429,87544667,87545021,87547946,	87541728,87542559,87543208,87544147,87544573,87544755,87545359,87548186,	Nr1d1	3.43302	0.00150407	1.3245	0.509098	2.86515	1	1	0	0	0	1	0	0	0	0	0
ctrlafb_g1_1.3.0_00009528	chr10	-	87770893	87802132	87770893	87802132	34	87770893,87772125,87772970,87773466,87773633,87774698,87775888,87776737,87778699,87778908,87779494,87780979,87781678,87781996,87782286,87784897,87785495,87785717,87787451,87788216,87788411,87788632,87789043,87789479,87791525,87793751,87793983,87795292,87795695,87797512,87799374,87800168,87800808,87802011,	87771868,87772324,87773104,87773509,87773756,87774850,87775978,87776919,87778782,87779069,87779585,87781174,87781878,87782130,87782517,87785045,87785616,87785831,87787543,87788325,87788516,87788742,87789168,87789636,87791663,87793854,87794156,87795504,87795792,87797657,87799437,87800258,87800960,87802132,	Top2a	2.58385	4.82e-13	2.66376	0.00452044	2.08393	1	1	1	0	0	0	0	0	1	0	0
ctrlafb_g1_1.3.0_00009529	chr10	-	87771337	87800962	87771337	87800962	33	87771337,87772125,87772970,87773466,87773633,87774698,87775888,87776737,87778699,87778908,87779494,87780979,87781678,87781996,87782286,87784897,87785495,87785717,87787451,87788216,87788411,87788628,87789043,87789479,87791525,87793751,87793983,87795292,87795695,87797512,87799373,87800168,87800808,	87771868,87772324,87773104,87773509,87773756,87774850,87775978,87776919,87778782,87779069,87779585,87781174,87781878,87782130,87782517,87785045,87785616,87785831,87787543,87788325,87788512,87788742,87789168,87789636,87791663,87793854,87794156,87795504,87795792,87797654,87799437,87800258,87800962,	Top2a	2.5661	4.93e-12	2.66376	0.0071799	0	1	1	0	0	0	1	0	0	0	0	0
ctrlafb_g1_1.3.0_00009558	chr10	-	89080953	89085670	89080953	89085670	6	89080953,89081432,89081716,89082178,89082548,89085186,	89081319,89081557,89081877,89082334,89082630,89085670,	Krt19	3.29435	3.11e-07	2.08853	0.029483	3.30215	0.000946004	1	0	1	0	0	0	0	0	1	0
ctrlafb_g1_1.3.0_00009614	chr10	-	91022605	91026759	91022605	91026759	2	91022605,91026513,	91024133,91026759,	Sost	-2.90884	0.00236381	-1.12293	0.634439	-3.10773	0.119644	1	0	0	0	1	0	0	0	0	0
ctrlafb_g1_1.3.0_00009809	chr10	-	108388185	108397520	108388185	108397520	6	108388185,108391941,108393432,108393692,108395608,108397389,	108389551,108392193,108393563,108393883,108395680,108397520,	Lgals3bp	2.78584	4.58e-10	2.15624	0.0156313	2.69583	1	1	0	0	0	1	0	0	0	0	0
ctrlafb_g1_1.3.0_00009925	chr10	+	31892075	31929441	31892075	31929441	9	31892075,31897525,31899590,31902070,31902468,31920603,31923554,31926465,31927392,	31892135,31897866,31899883,31902153,31902521,31920658,31923644,31926504,31929441,	Not RefSeq	-2.97697	0.000707943	-4.06778	0.0134134	-2.61802	1	1	0	0	0	1	0	0	0	0	0
ctrlafb_g1_1.3.0_00009987	chr10	+	55798710	55801685	55798710	55801685	6	55798710,55798992,55800557,55800737,55800936,55801313,	55798867,55799065,55800659,55800800,55801127,55801685,	Aurkb	3.10071	0.000120943	2.61757	0.00499301	982.196	0.986968	1	1	0	0	0	0	0	1	0	0
ctrlafb_g1_1.3.0_00009988	chr10	+	55798971	55804986	55798971	55804986	8	55798971,55800557,55800737,55800936,55801313,55801534,55802849,55803611,	55799065,55800659,55800800,55801127,55801451,55801682,55803023,55804986,	Aurkb	3.64027	2.48e-10	2.61757	0.00363783	16.7791	0.266447	1	1	0	0	0	0	0	1	0	0
ctrlafb_g1_1.3.0_00009997	chr10	+	56998778	57003097	56998778	57003097	10	56998778,56999915,57000661,57001219,57001400,57001551,57001875,57002056,57002284,57002541,	56998962,57000107,57000774,57001314,57001471,57001622,57001961,57002207,57002390,57003097,	Clec10a	2.12299	0.00341913	1.45353	0.0132464	1.51496	0.668515	1	0	0	0	1	0	0	0	0	0
ctrlafb_g1_1.3.0_00010081	chr10	+	75404881	75537072	75404881	75537072	25	75404881,75407970,75413136,75415597,75417748,75420070,75423555,75426107,75435976,75439985,75442840,75449027,75458639,75462827,75463492,75465180,75467608,75475944,75480157,75484958,75485810,75493965,75503833,75505571,75536785,	75405293,75408071,75413176,75415713,75417835,75420192,75423678,75426174,75436100,75440035,75442921,75449103,75458818,75462941,75463710,75465316,75467693,75476138,75480465,75485080,75485999,75494083,75503943,75505649,75537072,	Trim37	2.0812	7.43e-08	2.20963	0.00157418	1.00621	1	1	1	0	0	0	0	0	1	0	0
ctrlafb_g1_1.3.0_00010082	chr10	+	75404882	75537072	75404882	75537072	25	75404882,75407970,75413136,75415597,75417748,75420070,75423555,75426107,75435976,75439985,75442840,75449027,75458639,75462827,75463492,75465180,75467608,75475944,75480157,75484958,75485810,75493965,75503833,75505571,75536785,	75405293,75408071,75413176,75415713,75417835,75420192,75423678,75426174,75436100,75440035,75442921,75449103,75458818,75462941,75463710,75465316,75467693,75476138,75480465,75485080,75485999,75494083,75503968,75505649,75537072,	Trim37	2.07996	7.59e-08	2.20963	0.000994036	2.4209	1	1	1	0	0	0	0	0	1	0	0
ctrlafb_g1_1.3.0_00010083	chr10	+	75404911	75505746	75404911	75505746	25	75404911,75405223,75407970,75413136,75415597,75417748,75420070,75423555,75426107,75435976,75439985,75442840,75449027,75458639,75462827,75463522,75465180,75467608,75475944,75480157,75484958,75485810,75493965,75503833,75505571,	75405179,75405293,75408071,75413176,75415713,75417835,75420192,75423678,75426174,75436100,75440035,75442921,75449103,75458818,75462941,75463710,75465316,75467693,75476138,75480465,75485080,75485999,75494083,75503943,75505746,	Trim37	2.07315	1.12e-07	2.20963	0.00119284	1.95079	1	1	1	0	0	0	0	0	1	0	0
ctrlafb_g1_1.3.0_00010388	chr10	-	76099137	76115205	76099137	76115205	12	76099137,76099965,76102012,76103012,76106861,76107473,76109181,76110077,76110504,76111244,76113762,76115008,	76099784,76100206,76102185,76103264,76107021,76107797,76109387,76110206,76110621,76111398,76113849,76115205,	Lpo	-40.0666	1.35e-08	-1.32007	0.21532	-9.19231	0.131771	1	0	0	0	1	0	0	0	0	0
ctrlafb_g1_1.3.0_00010394	chr10	-	82986343	82999929	82986343	82999929	11	82986343,82990929,82991801,82992070,82994443,82996417,82996611,82998243,82998718,82999007,82999307,	82987216,82991095,82991959,82992216,82994544,82996544,82996781,82998553,82998925,82999154,82999929,	Abcc3	12.067	3.31e-61	12.159	0.000199481	2.57779	1	1	1	0	0	0	0	0	1	0	0
ctrlafb_g1_1.3.0_00010414	chr10	-	87770893	87802110	87770893	87802110	34	87770893,87772125,87772970,87773466,87773633,87774698,87775888,87776737,87778699,87778908,87779494,87780979,87781678,87781996,87782286,87784897,87785495,87785717,87787451,87788216,87788411,87788628,87789043,87789479,87791525,87793751,87793983,87795292,87795695,87797512,87799374,87800168,87800808,87802011,	87771868,87772324,87773104,87773509,87773756,87774850,87775978,87776919,87778782,87779069,87779585,87781174,87781878,87782130,87782517,87785045,87785616,87785831,87787543,87788325,87788512,87788742,87789168,87789636,87791663,87793854,87794156,87795504,87795792,87797657,87799437,87800258,87800960,87802110,	Top2a	2.58257	6.79e-13	2.66376	0.0054206	0	1	1	0	0	0	1	0	0	0	0	0
ctrlafb_g1_1.3.0_00010531	chr10	-	110032037	110035902	110032037	110035902	8	110032037,110033295,110033615,110033816,110034242,110035034,110035314,110035846,	110032204,110033458,110033707,110034037,110034421,110035104,110035443,110035902,	Pycr1	3.45576	0.00221254	-2.14418	0.0515194	3.33538	0.0305321	1	0	0	0	1	0	0	0	0	0
ctrlafb_g1_1.3.0_00010721	chr10	+	75404911	75537072	75404911	75537072	26	75404911,75405223,75407970,75413136,75415597,75417748,75420070,75423555,75426107,75435976,75439985,75442840,75449027,75458639,75462827,75463492,75465180,75467607,75475944,75480157,75484958,75485810,75493965,75503833,75505571,75536785,	75405179,75405293,75408071,75413176,75415713,75417835,75420192,75423678,75426174,75436100,75440035,75442921,75449103,75458818,75462941,75463710,75465316,75467693,75476138,75480465,75485080,75485999,75494083,75503943,75505649,75537072,	Trim37	2.08147	7.59e-08	2.20963	0.000994431	1.33003	1	1	1	0	0	0	0	0	1	0	0
ctrlafb_g1_1.3.0_00011006	chr10	-	87541246	87545402	87541246	87545402	7	87541246,87542349,87543023,87543504,87544429,87544667,87545021,	87541728,87542559,87543208,87544147,87544573,87544755,87545402,	Nr1d1	3.41252	0.00136218	1.3245	0.496307	6.37086	1	1	0	0	0	1	0	0	0	0	0
ctrlafb_g1_1.3.0_00011007	chr10	-	87770907	87800962	87770907	87800962	33	87770907,87772125,87772970,87773466,87773633,87774698,87775888,87776737,87778699,87778908,87779494,87780979,87781678,87781996,87782286,87784897,87785495,87785717,87787451,87788216,87788411,87788632,87789043,87789479,87791525,87793751,87793983,87795292,87795695,87797512,87799373,87800168,87800808,	87771868,87772324,87773104,87773509,87773756,87774850,87775978,87776919,87778782,87779069,87779585,87781174,87781878,87782130,87782517,87785045,87785616,87785831,87787543,87788325,87788516,87788742,87789168,87789636,87791663,87793854,87794156,87795504,87795792,87797654,87799437,87800258,87800962,	Top2a	2.56959	1.95e-12	2.66376	0.0057677	0	1	1	0	0	0	1	0	0	0	0	0
ctrlafb_g1_1.3.0_00011272	chr10	+	75404879	75506824	75404879	75506824	24	75404879,75407970,75413136,75415597,75417748,75420070,75423555,75426107,75435976,75439985,75442840,75449027,75458639,75462827,75463492,75465180,75467608,75475944,75480157,75484958,75485810,75493965,75503833,75505571,	75405293,75408071,75413176,75415713,75417835,75420192,75423678,75426174,75436100,75440035,75442921,75449103,75458818,75462941,75463710,75465316,75467693,75476138,75480465,75485080,75485999,75494083,75503943,75506824,	Trim37	2.00644	1e-07	1.91076	0.00753072	2.7082	1	1	0	0	0	1	0	0	0	0	0
ctrlafb_g1_1.3.0_00011273	chr10	+	75404899	75537072	75404899	75537072	24	75404899,75407970,75413136,75415597,75417748,75420070,75423555,75426107,75435976,75439985,75442840,75449027,75458639,75462827,75463492,75465180,75467608,75475944,75480157,75485810,75493965,75503833,75505571,75536785,	75405293,75408071,75413176,75415713,75417835,75420192,75423678,75426174,75436100,75440035,75442921,75449103,75458818,75462941,75463710,75465316,75467693,75476138,75480465,75485999,75494083,75503943,75505649,75537072,	Trim37	2.05091	1.47e-07	2.20963	0.00159077	1.06023	1	1	1	0	0	0	0	0	1	0	0
ctrlafb_g1_1.3.0_00011399	chr10	-	25776378	25781836	25776378	25781836	6	25776378,25778869,25779052,25779647,25781384,25781785,	25778653,25778967,25779130,25779900,25781644,25781836,	Ccng1	3.4155	1.25e-26	3.60943	0.000198177	3.42576	1	1	1	0	0	0	0	0	1	0	0
ctrlafb_g1_1.3.0_00011512	chr10	-	87770887	87800962	87770887	87800962	33	87770887,87772125,87772970,87773466,87773633,87774698,87775888,87776737,87778699,87778908,87779494,87780979,87781678,87781996,87782286,87784897,87785495,87785717,87787451,87788216,87788411,87788628,87789043,87789479,87791525,87793751,87793983,87795292,87795695,87797512,87799374,87800168,87800808,	87771868,87772324,87773104,87773509,87773756,87774850,87775978,87776919,87778782,87779069,87779585,87781174,87781878,87782130,87782517,87785045,87785616,87785831,87787543,87788325,87788512,87788742,87789168,87789636,87791663,87793854,87794156,87795504,87795792,87797657,87799437,87800258,87800962,	Top2a	2.56923	2.51e-12	2.66376	0.00734564	-0.0877437	1	1	0	0	0	1	0	0	0	0	0
ctrlafb_g1_1.3.0_00011753	chr10	+	78679751	78692402	78679751	78692402	3	78679751,78681283,78690466,	78679917,78681352,78692402,	Mmd	14.1554	2.05e-07	3.12734	0.00179319	2.96531	0.253781	1	1	0	0	0	0	0	1	0	0
ctrlafb_g1_1.3.0_00011789	chr10	+	102387468	102391345	102387468	102391345	2	102387468,102388381,	102387726,102391345,	Not RefSeq	4.92444	7.68e-14	2.84994	0.00060024	4.68291	0.00151603	1	1	1	1	0	0	0	0	0	0
ctrlafb_g1_1.3.0_00011950	chr10	-	66645415	66653290	66645415	66653290	8	66645415,66647865,66648186,66648534,66650535,66650810,66651366,66653043,	66647777,66648091,66648243,66649390,66650716,66650939,66651488,66653290,	Coro6	4.7127	1.8e-19	3.64169	0.00080289	6.0526	1	1	1	0	0	0	0	0	1	0	0
ctrlafb_g1_1.3.0_00011951	chr10	-	66645415	66653290	66645415	66653290	9	66645415,66647865,66648186,66648534,66648770,66650535,66650810,66651366,66653043,	66647777,66648095,66648243,66648679,66649390,66650716,66650939,66651488,66653290,	Coro6	4.70697	1.94e-19	3.64169	0.000599161	-1.28022	1	1	1	0	0	0	0	0	1	0	0
ctrlafb_g1_1.3.0_00011982	chr10	-	82874859	82881149	82874859	82881149	2	82874859,82880499,	82878027,82881149,	Not RefSeq	276.902	6.84e-38	14.7364	0.000203004	48.5121	2.88251e-06	1	1	1	1	0	0	0	0	0	0
ctrlafb_g1_1.3.0_00011994	chr10	-	87770922	87779683	87770922	87779683	11	87770922,87772125,87772970,87773466,87773633,87774698,87775888,87776737,87778699,87778908,87779494,	87771868,87772324,87773104,87773509,87773756,87774850,87775978,87776919,87778782,87779069,87779683,	Top2a	2.72803	4.96e-10	2.66376	0.00588235	3.42383	1	1	0	0	0	1	0	0	0	0	0
ctrlafb_g1_1.3.0_00011995	chr10	-	87770922	87802207	87770922	87802207	34	87770922,87772125,87772970,87773466,87773633,87774698,87775888,87776737,87778699,87778908,87779494,87780979,87781678,87781996,87782286,87784897,87785495,87785717,87787451,87788216,87788411,87788632,87789043,87789479,87791525,87793751,87793983,87795292,87795695,87797512,87799373,87800168,87800808,87802011,	87771868,87772324,87773104,87773509,87773756,87774850,87775978,87776919,87778782,87779069,87779585,87781174,87781878,87782130,87782517,87785045,87785616,87785831,87787543,87788325,87788516,87788742,87789168,87789636,87791663,87793854,87794156,87795504,87795792,87797654,87799437,87800258,87800960,87802207,	Top2a	2.58385	4.82e-13	2.66376	0.00433071	0.468463	1	1	1	0	0	0	0	0	1	0	0
ctrlafb_g1_1.3.0_00012057	chr10	-	108388185	108397602	108388185	108397602	6	108388185,108391941,108393432,108393692,108395608,108397389,	108389421,108392193,108393563,108393883,108395680,108397602,	Lgals3bp	2.8041	2.6e-10	2.15624	0.0195648	3.54511	1	1	0	0	0	1	0	0	0	0	0
ctrlafb_g1_1.3.0_00012093	chr10	+	12944151	12947271	12944151	12947271	3	12944151,12944554,12945843,	12944195,12944617,12947271,	Cldn6	4.46366	0.00242137	-1.34959	0.566072	3.7707	0.0921798	1	0	0	0	1	0	0	0	0	0
ctrlafb_g1_1.3.0_00012149	chr10	+	55445210	55576096	55445210	55576096	40	55445210,55452823,55474231,55487988,55501417,55507823,55518898,55519730,55521745,55522068,55523445,55524223,55528818,55531090,55532033,55543415,55543694,55545292,55545573,55546038,55546236,55548574,55551125,55551664,55552956,55554070,55557909,55558868,55561392,55562114,55562636,55563348,55564896,55565884,55568581,55569974,55570729,55572117,55573672,55574439,	55445444,55453198,55474387,55488015,55501519,55507915,55518961,55519828,55521888,55522163,55523563,55524375,55528991,55531263,55532147,55543608,55543815,55545361,55545733,55546146,55546367,55548780,55551262,55551787,55553127,55554282,55558053,55559074,55561496,55562266,55562884,55563560,55565108,55566045,55568709,55570062,55571137,55572225,55573844,55576096,	Myh10	2.69222	1.89e-13	1.34201	0.0377738	1.96898	1	1	0	0	0	1	0	0	0	0	0
ctrlafb_g1_1.3.0_00012193	chr10	+	78671592	78692402	78671592	78692402	6	78671592,78673839,78678245,78679816,78681283,78690466,	78671789,78673999,78678319,78679917,78681352,78692402,	Mmd	15.0849	4.05e-08	3.12734	0.00303767	1.83339	0.693008	1	1	0	0	0	0	0	1	0	0
ctrlafb_g1_1.3.0_00012381	chr10	-	87770893	87800962	87770893	87800962	33	87770893,87772125,87772970,87773466,87773633,87774698,87775888,87776737,87778699,87778908,87779494,87780979,87781678,87781996,87782286,87784897,87785495,87785717,87787451,87788216,87788411,87788632,87789043,87789479,87791525,87793751,87793983,87795292,87795695,87797512,87799374,87800168,87800808,	87771868,87772324,87773104,87773509,87773756,87774850,87775978,87776919,87778782,87779069,87779585,87781174,87781878,87782130,87782517,87785045,87785616,87785831,87787543,87788325,87788516,87788742,87789168,87789636,87791663,87793854,87794156,87795504,87795792,87797657,87799437,87800258,87800962,	Top2a	2.56959	1.95e-12	2.66376	0.00547002	0	1	1	0	0	0	1	0	0	0	0	0
ctrlafb_g1_1.3.0_00012476	chr10	+	34112559	34120415	34112559	34120415	4	34112559,34113689,34114245,34117391,	34113208,34113804,34114280,34120415,	Not RefSeq	3.14963	2.34e-10	1.9026	0.00542386	2.42886	0.508778	1	0	0	0	1	0	0	0	0	0
ctrlafb_g1_1.3.0_00012510	chr10	+	55445210	55568805	55445210	55568805	35	55445210,55452823,55474231,55487988,55501417,55507823,55518898,55519730,55521745,55522068,55523445,55524223,55528818,55531090,55532033,55543415,55543694,55545292,55545573,55546038,55546236,55548574,55551125,55551664,55552956,55554070,55557909,55558868,55561392,55562114,55562636,55563348,55564896,55565884,55568581,	55445444,55453198,55474387,55488015,55501519,55507915,55518961,55519828,55521888,55522163,55523563,55524375,55528991,55531263,55532147,55543608,55543815,55545361,55545733,55546146,55546367,55548780,55551262,55551787,55553127,55554282,55558053,55559074,55561496,55562266,55562884,55563560,55565108,55566045,55568805,	Myh10	3.049	1.69e-13	1.25379	0.0823293	0.235207	1	1	0	0	0	1	0	0	0	0	0
ctrlafb_g1_1.3.0_00012511	chr10	+	55572045	55576108	55572045	55576108	3	55572045,55573672,55574439,	55572225,55573844,55576108,	Myh10	2.2924	7.48e-07	1.71718	0.000604351	4.91975	1	1	0	0	0	1	0	0	0	0	0
ctrlafb_g1_1.3.0_00012621	chr10	+	105543856	105556645	105543856	105556645	4	105543856,105546915,105552075,105554972,	105544157,105547058,105552988,105556645,	Slc16a5	78.1979	3.75e-16	1.21717	0.62948	173008	0.999107	1	0	0	0	1	0	0	0	0	0
ctrlafb_g1_1.3.0_00012680	chr10	-	28527410	28533104	28527410	28533104	6	28527410,28528255,28529485,28531459,28532464,28533079,	28527565,28528413,28529578,28531637,28532574,28533104,	Pttg1	3.45735	7.51e-08	-1.06206	0.826597	1.7349	0.113533	1	0	0	0	1	0	0	0	0	0
ctrlafb_g1_1.3.0_00012687	chr10	-	37159218	37166878	37159218	37166878	5	37159218,37160400,37161141,37161888,37166748,	37160267,37160654,37161653,37162235,37166878,	N4bp3	3.1537	0.0013843	1.30802	0.0863425	3.07743	0.0907044	1	0	0	0	1	0	0	0	0	0
ctrlafb_g1_1.3.0_00012754	chr10	-	64313146	64330975	64313146	64330975	24	64313146,64313786,64313974,64314129,64314901,64315106,64315487,64315784,64319894,64320166,64320553,64320735,64321056,64321412,64321612,64321953,64322243,64322447,64322702,64327256,64327538,64328243,64330556,64330867,	64313458,64313866,64314048,64314520,64315012,64315226,64315573,64315895,64320035,64320299,64320655,64320882,64321149,64321525,64321704,64322072,64322377,64322539,64322776,64327433,64328184,64328527,64330678,64330975,	Spag5	2.48907	8.27e-05	3.57531	0.000403307	3.20817	0.561297	1	1	0	0	0	0	0	1	0	0
ctrlafb_g1_1.3.0_00012757	chr10	-	66645527	66653496	66645527	66653496	9	66645527,66647865,66648186,66648534,66648770,66650535,66650810,66651366,66653043,	66647777,66648095,66648243,66648679,66648874,66650716,66650939,66651488,66653496,	Coro6	4.78198	2.69e-19	3.64169	0.000604473	3.13426	1	1	1	0	0	0	0	0	1	0	0
ctrlafb_g1_1.3.0_00012758	chr10	-	66645527	66653496	66645527	66653496	9	66645527,66647865,66648186,66648534,66648770,66650535,66650810,66651366,66653043,	66647774,66648095,66648243,66648679,66649390,66650716,66650939,66651488,66653496,	Coro6	4.76387	9.75e-20	3.64169	0.0010008	174.959	1	1	1	0	0	0	0	0	1	0	0
ctrlafb_g1_1.3.0_00012774	chr10	-	75362715	75382659	75362715	75382659	9	75362715,75367469,75367644,75368793,75370736,75373022,75376487,75376840,75382462,	75363276,75367565,75367703,75368908,75370834,75373285,75376609,75376990,75382659,	Prr11	3.42126	2.99e-06	-1.03433	0.208697	3.44718	0.131812	1	0	0	0	1	0	0	0	0	0
ctrlafb_g1_1.3.0_00012781	chr10	-	82874861	82882074	82874861	82882074	2	82874861,82881912,	82878027,82882074,	Not RefSeq	482.49	8.92e-41	14.7364	0.000203666	0.307791	0.0857063	1	1	0	0	0	0	0	1	0	0
ctrlafb_g1_1.3.0_00012898	chr10	+	34110903	34120450	34110903	34120450	5	34110903,34113186,34113689,34114245,34117391,	34111134,34113208,34113804,34114280,34120450,	Not RefSeq	3.33606	3.89e-11	1.9026	0.00485535	3.72543	0.00732975	1	0	0	0	1	0	0	0	0	0
ctrlafb_g1_1.3.0_00013059	chr10	-	28521974	28533107	28521974	28533107	7	28521974,28527462,28528255,28529485,28531459,28532464,28533079,	28522021,28527565,28528413,28529578,28531637,28532560,28533107,	Pttg1	3.57336	9.49e-08	-1.06206	0.819742	0.364126	0.260688	1	0	0	0	1	0	0	0	0	0
ctrlafb_g1_1.3.0_00013134	chr10	-	66646677	66654492	66646677	66654492	11	66646677,66647865,66648186,66648534,66648770,66649271,66650535,66650810,66651366,66653043,66654336,	66647777,66648095,66648243,66648679,66648874,66649390,66650716,66650939,66651488,66653294,66654492,	Coro6	8.40807	5.45e-26	3.64169	0.0010099	15.8914	1	1	1	0	0	0	0	0	1	0	0
ctrlafb_g1_1.3.0_00013149	chr10	-	82986546	83000274	82986546	83000274	12	82986546,82990929,82991801,82992070,82994443,82996417,82996611,82998243,82998718,82999007,82999307,83000248,	82987216,82991095,82991959,82992216,82994544,82996544,82996781,82998553,82998925,82999154,82999418,83000274,	Abcc3	13.3117	1.81e-53	12.159	0.000202143	12.6133	1	1	1	0	0	0	0	0	1	0	0
ctrlafb_g1_1.3.0_00013220	chr11	+	17993680	18015913	17993680	18015913	7	17993680,18004524,18004946,18008927,18011026,18014547,18014846,	17994193,18004833,18005103,18009013,18011128,18014625,18015913,	Chodl	-14.1011	7.74e-11	-4.09235	0.0028	4.81934e-06	0.499945	1	1	0	0	0	0	0	1	0	0
ctrlafb_g1_1.3.0_00013221	chr11	+	17993680	18015913	17993680	18015913	6	17993680,18004524,18004946,18008927,18011026,18014547,	17994193,18004833,18005103,18009013,18011128,18015913,	Chodl	-15.0897	1.1e-10	-4.09235	0.00200562	-11.2853	0.00718195	1	1	0	0	0	0	0	1	0	0
ctrlafb_g1_1.3.0_00013263	chr11	+	34110848	34130928	34110848	34130928	14	34110848,34111339,34112101,34114002,34114948,34119021,34120822,34121329,34123356,34123518,34125356,34127059,34130001,34130717,	34110899,34111527,34112233,34114119,34115051,34119117,34120906,34121422,34123425,34123609,34125518,34127490,34130092,34130928,	Chaf1b	4.82083	2.57e-05	1.32962	0.396048	4.79575	0.02151	1	0	0	0	1	0	0	0	0	0
ctrlafb_g1_1.3.0_00013280	chr11	+	36828273	36889381	36828273	36889381	3	36828273,36857377,36888984,	36828334,36857428,36889381,	Pcp4	420.841	4.91e-16	30.3523	0.000203417	89.3353	2.66776e-06	1	1	1	1	0	0	0	0	0	0
ctrlafb_g1_1.3.0_00013537	chr11	-	25503380	25548845	25503380	25548845	8	25503380,25507360,25509346,25509856,25511261,25525078,25534838,25547757,	25503947,25507535,25509521,25510039,25511544,25525245,25534970,25548845,	Adamts5	2.89002	0.00258223	2.63484	0.0336614	2.86776	0.147891	1	0	0	0	1	0	0	0	0	0
ctrlafb_g1_1.3.0_00013704	chr11	-	67915535	67944757	67915535	67944757	6	67915535,67917565,67924122,67925380,67928499,67944607,	67915730,67917740,67924283,67925497,67928626,67944757,	Ropn1	10.2186	2.97e-05	5.43211	0.000997407	0	1	1	1	0	0	0	0	0	1	0	0
ctrlafb_g1_1.3.0_00013808	chr11	-	82027632	82046332	82027632	82046332	17	82027632,82028418,82028632,82028883,82029167,82029434,82030091,82030444,82031479,82031860,82032057,82032394,82032646,82033675,82036101,82038105,82045827,	82028252,82028520,82028787,82029076,82029316,82029649,82030338,82030566,82031531,82031968,82032216,82032518,82032996,82033830,82036773,82038169,82046332,	Ephb3	3.80814	0.00170041	1.12454	0.362948	3.74514	0.0736325	1	0	0	0	1	0	0	0	0	0
ctrlafb_g1_1.3.0_00014443	chr11	+	56771946	56805902	56771946	56805902	4	56771946,56774160,56775117,56804220,	56772002,56774498,56775416,56805902,	Not RefSeq	6.34029	7.94e-16	1.06132	0.399638	5.85683	0.0357499	1	0	0	0	1	0	0	0	0	0
ctrlafb_g1_1.3.0_00014528	chr11	-	67915416	67922069	67915416	67922069	3	67915416,67917565,67921873,	67915730,67917740,67922069,	Ropn1	10.9383	6.03e-05	5.43211	0.00159426	10.0729	0.00107515	1	1	1	1	0	0	0	0	0	0
ctrlafb_g1_1.3.0_00014949	chr12	+	2256452	2265041	2256452	2265041	10	2256452,2256617,2257223,2257778,2258954,2259874,2261220,2261658,2263550,2264696,	2256516,2256703,2257312,2257864,2259040,2259960,2261306,2261809,2263659,2265041,	Cd209b	2.29495	0.000742571	1.62163	0.0285137	1.87722	0.258629	1	0	0	0	1	0	0	0	0	0
ctrlafb_g1_1.3.0_00014950	chr12	+	2283730	2290484	2283730	2290484	7	2283730,2283955,2284303,2285128,2285667,2288265,2290209,	2283854,2284041,2284392,2285202,2285818,2288374,2290484,	Clec4m	33.4831	2.09e-16	1.9897	0.201969	2.35236	0.0042083	1	0	1	0	0	0	0	0	1	0
ctrlafb_g1_1.3.0_00015117	chr12	+	22776252	22777239	22776252	22777239	4	22776252,22776576,22776827,22777037,	22776288,22776692,22776947,22777239,	LOC686120	3.45607	0.000495513	1.00494	0.84701	3.36873	1	1	0	0	0	1	0	0	0	0	0
ctrlafb_g1_1.3.0_00015164	chr12	+	32898194	32924599	32898194	32924599	4	32898194,32919645,32920361,32922948,	32898305,32919791,32920402,32924599,	Ccdc92	15.3084	2.72e-08	1.66091	0.091326	0.100456	1	1	0	0	0	1	0	0	0	0	0
ctrlafb_g1_1.3.0_00015284	chr12	+	43566784	43624986	43566784	43624986	16	43566784,43591010,43592032,43594057,43594812,43596290,43604225,43608142,43609099,43609608,43613278,43616582,43619137,43620389,43621743,43624306,	43566961,43591170,43592117,43594155,43594883,43596414,43604288,43608267,43609216,43609692,43613354,43616689,43619248,43620470,43621832,43624986,	Svop	5.66577	0.000119704	15.4512	0.000199045	215586	0.999354	1	1	0	0	0	0	0	1	0	0
ctrlafb_g1_1.3.0_00015438	chr12	-	15136816	15201367	15136816	15201367	2	15136816,15201011,	15140634,15201367,	Elfn1	6.47159	0.000941367	1.11395	0.661615	0.0620709	0.0650437	1	0	0	0	1	0	0	0	0	0
ctrlafb_g1_1.3.0_00015589	chr12	-	33906847	33928903	33906847	33928903	20	33906847,33908994,33909741,33910363,33911149,33912915,33913180,33915280,33915880,33916531,33917043,33918582,33920740,33924479,33924701,33925125,33925728,33926046,33926184,33928813,	33907049,33909084,33909886,33910452,33911278,33912978,33913234,33915336,33915975,33916666,33917161,33918660,33920786,33924587,33924911,33925198,33925941,33926104,33926355,33928903,	Kntc1	3.94897	8.82e-08	2.04587	0.00292398	5.40196	1	1	1	0	0	0	0	0	1	0	0
ctrlafb_g1_1.3.0_00015590	chr12	-	33906847	33977070	33906847	33977070	58	33906847,33908994,33909741,33910363,33911149,33912915,33913180,33915280,33915880,33916531,33917043,33918582,33920740,33924479,33924701,33925125,33925728,33926046,33926184,33931630,33933795,33934279,33935780,33938688,33939267,33940145,33941073,33942555,33943099,33943633,33944787,33945860,33947192,33948356,33948803,33949031,33950383,33951870,33952109,33953608,33953913,33954498,33956124,33957712,339…	33907049,33909084,33909886,33910452,33911278,33912978,33913234,33915336,33915975,33916666,33917161,33918660,33920786,33924587,33924911,33925198,33925941,33926104,33926355,33931834,33933904,33934395,33935908,33938792,33939430,33940201,33941211,33942652,33943271,33943913,33944854,33945932,33947311,33948490,33948902,33949134,33950481,33952014,33952225,33953709,33953969,33954641,33956235,33957773,339…	Kntc1	3.78406	3.96e-11	2.04587	0.00390244	0	1	1	1	0	0	0	0	0	1	0	0
ctrlafb_g1_1.3.0_00015777	chr12	+	22776025	22777605	22776025	22777605	4	22776025,22776598,22776827,22777037,	22776288,22776692,22776947,22777605,	LOC686120	2.10466	0.00101181	1.00494	0.845084	4.71982	1	1	0	0	0	1	0	0	0	0	0
ctrlafb_g1_1.3.0_00016247	chr12	+	15402177	15404128	15402177	15404128	6	15402177,15402412,15402551,15403128,15403303,15403881,	15402298,15402476,15402674,15403218,15403376,15404128,	Not RefSeq	2.41943	0.00301651	3.33811	0.000792079	-0.395286	0.211391	1	1	0	0	0	0	0	1	0	0
ctrlafb_g1_1.3.0_00016273	chr12	+	32897948	32924806	32897948	32924806	4	32897948,32919645,32920361,32922948,	32898042,32919791,32920402,32924806,	Ccdc92	14.685	9.9e-08	1.66091	0.0917797	10.9468	1	1	0	0	0	1	0	0	0	0	0
ctrlafb_g1_1.3.0_00016305	chr12	+	43590863	43625654	43590863	43625654	16	43590863,43591010,43592032,43594057,43594812,43596290,43604225,43608142,43609099,43609608,43613278,43616582,43619137,43620389,43621743,43624306,	43590909,43591170,43592117,43594155,43594883,43596414,43604288,43608267,43609216,43609692,43613354,43616689,43619248,43620470,43621832,43625654,	Svop	5.20007	9.65e-05	15.4512	0.000199164	2.81115	0.175233	1	1	0	0	0	0	0	1	0	0
ctrlafb_g1_1.3.0_00016386	chr12	-	33906847	33977070	33906847	33977070	58	33906847,33908994,33909741,33910363,33911149,33912915,33913180,33915280,33915880,33916531,33917043,33918582,33920740,33924479,33924701,33925125,33925728,33926046,33926184,33931630,33933795,33934279,33935780,33938688,33939267,33940145,33941073,33942555,33943099,33943633,33944787,33945860,33947192,33948356,33948803,33949031,33950383,33951870,33952109,33953608,33953913,33954498,33956124,33957706,339…	33907049,33909084,33909886,33910452,33911278,33912978,33913234,33915336,33915975,33916666,33917161,33918660,33920786,33924587,33924911,33925198,33925941,33926104,33926355,33931834,33933904,33934395,33935908,33938792,33939430,33940201,33941211,33942652,33943271,33943913,33944854,33945932,33947311,33948490,33948902,33949134,33950481,33952014,33952225,33953709,33953969,33954641,33956229,33957773,339…	Kntc1	3.78406	3.96e-11	2.04587	0.00490581	-0.0246241	1	1	1	0	0	0	0	0	1	0	0
ctrlafb_g1_1.3.0_00016481	chr12	+	32922714	32924825	32922714	32924825	2	32922714,32922948,	32922759,32924825,	Ccdc92	14.9021	9.17e-08	1.66091	0.0892283	6.33055	1	1	0	0	0	1	0	0	0	0	0
ctrlafb_g1_1.3.0_00016616	chr12	+	15402177	15406368	15402177	15406368	8	15402177,15402412,15402551,15403128,15403303,15403881,15406019,15406181,	15402298,15402476,15402674,15403218,15403376,15403995,15406065,15406368,	Not RefSeq	2.49143	0.00446454	3.33811	0.00120943	3.20632	0.0835766	1	1	0	0	0	0	0	1	0	0
ctrlafb_g1_1.3.0_00016642	chr12	+	32915864	32924807	32915864	32924807	4	32915864,32919645,32920361,32922948,	32916008,32919791,32920402,32924807,	Ccdc92	15.1805	6.17e-08	1.66091	0.0976048	2.04857	1	1	0	0	0	1	0	0	0	0	0
ctrlafb_g1_1.3.0_00016742	chr12	+	2261582	2265331	2261582	2265331	3	2261582,2263550,2264696,	2261809,2263659,2265331,	Cd209b	2.40333	0.00431542	1.62163	0.0329276	1.03505	0.986182	1	0	0	0	1	0	0	0	0	0
ctrlafb_g1_1.3.0_00016928	chr12	+	2256452	2265041	2256452	2265041	10	2256452,2256617,2257223,2257778,2258954,2259874,2261220,2261658,2263550,2264696,	2256546,2256703,2257312,2257864,2259040,2259960,2261306,2261809,2263659,2265041,	Cd209b	2.27473	0.000782091	1.62163	0.0326109	0.421667	0.203824	1	0	0	0	1	0	0	0	0	0
ctrlafb_g1_1.3.0_00017024	chr12	-	33906847	33977070	33906847	33977070	59	33906847,33908994,33909741,33910363,33911149,33912915,33913180,33915280,33915880,33916531,33917043,33918582,33920740,33924479,33924701,33925125,33925728,33926046,33926184,33928813,33931630,33933795,33934279,33935780,33938688,33939267,33940145,33941073,33942555,33943099,33943633,33944787,33945860,33947192,33948356,33948803,33949031,33950383,33951870,33952109,33953608,33953913,33954498,33956124,339…	33907049,33909084,33909886,33910452,33911278,33912978,33913234,33915336,33915975,33916666,33917161,33918660,33920786,33924587,33924911,33925198,33925941,33926104,33926355,33928902,33931834,33933904,33934395,33935908,33938792,33939430,33940201,33941211,33942652,33943271,33943913,33944854,33945932,33947311,33948490,33948902,33949134,33950481,33952014,33952225,33953709,33953969,33954641,33956235,339…	Kntc1	3.70712	5.77e-11	2.04587	0.00566916	4.1806	1	1	0	0	0	1	0	0	0	0	0
ctrlafb_g1_1.3.0_00017097	chr13	+	43666569	43679410	43666569	43679410	4	43666569,43672219,43675885,43677155,	43666811,43672404,43676065,43679410,	LOC498222	4.05215	0.000266197	4.16988	0.00019988	4.99772	1	1	1	0	0	0	0	0	1	0	0
ctrlafb_g1_1.3.0_00017107	chr13	+	44582911	44605241	44582911	44605241	9	44582911,44594205,44594918,44595606,44596617,44600365,44600664,44602201,44604537,	44582993,44594398,44595074,44595723,44596735,44600564,44600786,44602342,44605241,	Ctse	2.31621	0.00117798	2.18689	0.0102	8.48034	0.0712812	1	0	0	0	1	0	0	0	0	0
ctrlafb_g1_1.3.0_00017159	chr13	+	47924340	47934842	47924340	47934842	7	47924340,47929268,47930230,47931911,47932533,47932747,47934480,	47924435,47929438,47930299,47932016,47932631,47932830,47934842,	Ube2t	3.38758	3.38e-05	3.19336	0.0066345	3.30947	0.0484882	1	0	0	0	1	0	0	0	0	0
ctrlafb_g1_1.3.0_00017165	chr13	+	48789678	48793999	48789678	48793999	2	48789678,48793338,	48790439,48793999,	Phlda3	2.87458	1.06e-09	1.95347	0.0133254	2.92111	1.80318e-06	1	0	1	0	0	0	0	0	1	0
ctrlafb_g1_1.3.0_00017213	chr13	+	67806413	67834137	67806413	67834137	16	67806413,67808987,67809136,67819083,67819238,67822311,67822438,67823746,67826209,67826530,67827476,67829316,67829789,67830092,67831446,67833990,	67806689,67809069,67809188,67819132,67819372,67822400,67822497,67823789,67826350,67826598,67827551,67829341,67829940,67830203,67831620,67834137,	Ncf2	3.87489	1.22e-12	-1.23883	0.638973	1.0052	0.993964	1	0	0	0	1	0	0	0	0	0
ctrlafb_g1_1.3.0_00017214	chr13	+	67806516	67834105	67806516	67834105	15	67806516,67808987,67809136,67819083,67819238,67822311,67822438,67823746,67826209,67826530,67827476,67829736,67830092,67831446,67833993,	67806689,67809069,67809188,67819132,67819372,67822400,67822497,67823789,67826350,67826598,67827551,67829940,67830203,67831623,67834105,	Ncf2	3.83506	2.34e-11	-1.23883	0.638189	0	1	1	0	0	0	1	0	0	0	0	0
ctrlafb_g1_1.3.0_00017350	chr13	+	89951924	90028590	89951924	90028590	52	89951924,89953304,89954750,89958396,89959270,89960696,89961399,89963310,89964298,89964550,89965529,89966382,89967923,89968571,89970924,89972652,89973406,89974507,89975367,89976378,89978142,89979743,89980942,89981958,89983342,89985180,89985981,89986490,89986693,89988071,89989449,89989841,89990201,89990710,89991031,89992041,89993849,89994534,89995662,90010945,90012374,90013065,90016266,90020214,900…	89952124,89953540,89954875,89958536,89959416,89960829,89961543,89963464,89964433,89964651,89965666,89966492,89968000,89968726,89971128,89972833,89973649,89974629,89975584,89976470,89978279,89979894,89981128,89982059,89983433,89985324,89986162,89986589,89986890,89988214,89989552,89990007,89990332,89990847,89991135,89992249,89993969,89994655,89995794,90011043,90012536,90013141,90016475,90020510,900…	Spta1	5.53069	0.00236697	2.96785	0.0435752	5.13117	0.0959848	1	0	0	0	1	0	0	0	0	0
ctrlafb_g1_1.3.0_00017471	chr13	-	41045677	41070868	41045677	41070868	17	41045677,41047312,41048376,41049236,41051027,41052103,41054084,41055302,41056135,41057459,41059715,41060199,41060586,41062292,41064522,41066701,41070654,	41046132,41047451,41048531,41049371,41051188,41052231,41054239,41055409,41056276,41057600,41059865,41060344,41060751,41062541,41064632,41066847,41070868,	Mcm6	2.19468	1.27e-06	2.21797	0.011	10371.2	0.90512	1	0	0	0	1	0	0	0	0	0
ctrlafb_g1_1.3.0_00017582	chr13	-	68151074	68211117	68151074	68211117	24	68151074,68155456,68155646,68157895,68159059,68159663,68160810,68162616,68163938,68165746,68166243,68168927,68170778,68172560,68173323,68174405,68178203,68179755,68181128,68183624,68187942,68192890,68210587,68210938,	68152604,68155555,68155804,68158094,68159173,68159812,68160954,68162765,68164017,68165951,68166399,68169075,68171023,68172742,68173541,68174517,68178392,68179877,68181264,68183722,68188077,68193078,68210786,68211117,	Lamc2	2.33777	0.00123384	1.6686	0.0152717	-0.0877021	1	1	0	0	0	1	0	0	0	0	0
ctrlafb_g1_1.3.0_00017688	chr13	-	85286634	85315366	85286634	85315366	14	85286634,85292062,85293490,85294410,85297280,85299234,85300473,85301764,85303569,85308586,85308991,85310673,85312036,85315257,	85287028,85292197,85293665,85294550,85297417,85299296,85300569,85301837,85303666,85308647,85309067,85310747,85312178,85315366,	Nuf2	2.4945	1.74e-06	3.01329	0.00364078	2.48847	0.0758397	1	1	0	0	0	0	0	1	0	0
ctrlafb_g1_1.3.0_00017714	chr13	-	87059476	87083085	87059476	87083085	3	87059476,87061856,87083046,	87060750,87061910,87083085,	Pcp4l1	3.40406	0.00394855	3.21394	0.00119237	3.89379	1	1	1	0	0	0	0	0	1	0	0
ctrlafb_g1_1.3.0_00017776	chr13	-	96722973	96752940	96722973	96752940	9	96722973,96723819,96725337,96727372,96728059,96729058,96734185,96736297,96752847,	96723392,96723944,96725445,96727580,96728188,96729285,96734365,96736484,96752940,	Ephx1	3.04629	7.21e-11	2.90583	0.00039557	2.31421	1	1	1	0	0	0	0	0	1	0	0
ctrlafb_g1_1.3.0_00017777	chr13	-	96722974	96799046	96722974	96799046	10	96722974,96723819,96725337,96727372,96728059,96729058,96734185,96736297,96740111,96799028,	96723392,96723944,96725445,96727580,96728188,96729285,96734365,96736484,96740234,96799046,	Ephx1	3.11866	1.83e-11	2.90583	0.000607533	0	1	1	1	0	0	0	0	0	1	0	0
ctrlafb_g1_1.3.0_00017778	chr13	-	96722969	96740347	96722969	96740347	9	96722969,96723819,96725337,96727372,96728059,96729058,96734185,96736297,96740111,	96723392,96723944,96725445,96727580,96728188,96729285,96734365,96736484,96740347,	Ephx1	3.11846	1.81e-11	2.90583	0.00019984	5.70065	1	1	1	0	0	0	0	0	1	0	0
ctrlafb_g1_1.3.0_00017791	chr13	-	99095659	99242282	99095659	99242282	10	99095659,99104990,99107431,99107831,99108827,99115518,99146603,99188981,99224212,99242074,	99099266,99105087,99107528,99107958,99108950,99115547,99147121,99189109,99224299,99242282,	Disp1	2.63766	4.05e-10	2.86551	0.00240385	2.42761	0.0151723	1	1	0	0	0	0	0	1	0	0
ctrlafb_g1_1.3.0_00017813	chr13	-	105920242	105965655	105920242	105965655	18	105920242,105924812,105926701,105928096,105928674,105929892,105934233,105939417,105945563,105947974,105949510,105956110,105957386,105959585,105960048,105961087,105962266,105965546,	105921414,105924990,105927177,105928255,105928826,105932727,105937615,105939552,105945685,105948102,105949635,105956312,105957671,105959676,105960160,105961283,105962459,105965655,	Cenpf	2.73711	1.99e-06	1.13651	0.403526	-3.0411	0.998206	1	0	0	0	1	0	0	0	0	0
ctrlafb_g1_1.3.0_00017814	chr13	-	105920242	105965655	105920242	105965655	17	105920242,105924812,105926701,105928674,105929892,105934233,105939417,105945563,105947974,105949510,105956110,105957386,105959585,105960048,105961087,105962266,105965546,	105921414,105924990,105927177,105928826,105932727,105937615,105939552,105945685,105948102,105949635,105956312,105957671,105959676,105960160,105961283,105962459,105965655,	Cenpf	2.73785	3.47e-06	1.13651	0.419587	-0.0508722	0.157967	1	0	0	0	1	0	0	0	0	0
ctrlafb_g1_1.3.0_00018032	chr13	-	87059475	87062279	87059475	87062279	2	87059475,87061856,	87060750,87062279,	Pcp4l1	3.37867	0.00408093	3.21394	0.0010016	1.81229	1	1	1	0	0	0	0	0	1	0	0
ctrlafb_g1_1.3.0_00018157	chr13	-	41045677	41070868	41045677	41070868	17	41045677,41047312,41048376,41049236,41051027,41052103,41054084,41055302,41056135,41057459,41059715,41060199,41060586,41062292,41064522,41066701,41070647,	41046132,41047451,41048531,41049371,41051188,41052231,41054239,41055409,41056276,41057600,41059865,41060344,41060751,41062541,41064632,41066840,41070868,	Mcm6	2.18934	1.45e-06	2.21797	0.00857199	-33930.3	0.986804	1	0	0	0	1	0	0	0	0	0
ctrlafb_g1_1.3.0_00018211	chr13	-	87059286	87083256	87059286	87083256	4	87059286,87061856,87072553,87083046,	87060750,87061910,87072689,87083256,	Pcp4l1	3.29621	0.00321137	3.21394	0.00181159	3.40959	1	1	1	0	0	0	0	0	1	0	0
ctrlafb_g1_1.3.0_00018225	chr13	-	96722973	96760056	96722973	96760056	7	96722973,96723819,96725337,96727372,96728059,96729058,96760031,	96723392,96723944,96725445,96727580,96728188,96729139,96760056,	Ephx1	3.06105	2.88e-10	2.90583	0.000203376	-0.300986	1	1	1	0	0	0	0	0	1	0	0
ctrlafb_g1_1.3.0_00018244	chr13	+	44594154	44605241	44594154	44605241	8	44594154,44594918,44595606,44596617,44600365,44600664,44602201,44604537,	44594398,44595074,44595723,44596735,44600564,44600786,44602342,44605241,	Ctse	2.30593	0.00197393	2.18689	0.00908174	-992.219	0.954817	1	0	0	0	1	0	0	0	0	0
ctrlafb_g1_1.3.0_00018385	chr13	-	105920242	105965655	105920242	105965655	18	105920242,105924812,105926701,105928096,105928674,105929892,105934233,105939417,105945563,105947974,105949510,105956110,105957386,105959585,105960063,105961087,105962266,105965546,	105921414,105924990,105927177,105928255,105928826,105932727,105937615,105939552,105945685,105948102,105949635,105956312,105957671,105959676,105960160,105961283,105962459,105965655,	Cenpf	2.73472	2.22e-06	1.13651	0.410646	3.14401	0.00362865	1	0	1	0	0	0	0	0	1	0
ctrlafb_g1_1.3.0_00018400	chr13	+	43675424	43679511	43675424	43679511	2	43675424,43677155,	43676065,43679511,	LOC498222	3.80963	0.00177068	4.16988	0.000201045	1.87345	1	1	1	0	0	0	0	0	1	0	0
ctrlafb_g1_1.3.0_00018423	chr13	+	67806408	67834149	67806408	67834149	15	67806408,67808987,67809136,67819083,67819238,67822311,67822438,67823746,67826209,67826530,67827476,67829736,67830092,67831446,67833990,	67806689,67809069,67809188,67819132,67819372,67822400,67822497,67823789,67826350,67826598,67827551,67829940,67830203,67831620,67834149,	Ncf2	3.8333	5.59e-13	-1.23883	0.639616	0.62335	0.0761659	1	0	0	0	1	0	0	0	0	0
ctrlafb_g1_1.3.0_00018484	chr13	-	68151074	68162882	68151074	68162882	8	68151074,68155456,68155646,68157895,68159059,68159663,68160810,68162616,	68152604,68155555,68155804,68158094,68159173,68159812,68160954,68162882,	Lamc2	2.36421	0.000372023	1.91028	0.00902315	4.29071	1	1	0	0	0	1	0	0	0	0	0
ctrlafb_g1_1.3.0_00018548	chr13	+	67806403	67834334	67806403	67834334	16	67806403,67808987,67809136,67819083,67819238,67822311,67822438,67823746,67826209,67826530,67827476,67829316,67829789,67830092,67831446,67833993,	67806689,67809069,67809188,67819132,67819372,67822400,67822497,67823789,67826350,67826598,67827551,67829341,67829940,67830203,67831623,67834334,	Ncf2	3.87225	5.36e-12	-1.23883	0.647564	0.324626	0.183502	1	0	0	0	1	0	0	0	0	0
ctrlafb_g1_1.3.0_00018549	chr13	+	67808968	67834133	67808968	67834133	15	67808968,67809136,67819083,67819238,67822311,67822438,67823746,67826209,67826530,67827476,67829316,67829789,67830092,67831446,67833993,	67809069,67809188,67819132,67819372,67822400,67822497,67823789,67826350,67826598,67827551,67829341,67829940,67830203,67831623,67834133,	Ncf2	4.04908	1.36e-10	-1.23883	0.634131	1.86279	0.0149012	1	0	0	0	1	0	0	0	0	0
ctrlafb_g1_1.3.0_00018600	chr13	-	68151074	68166431	68151074	68166431	11	68151074,68155456,68155646,68157895,68159059,68159663,68160810,68162616,68163938,68165746,68166243,	68152604,68155555,68155804,68158094,68159173,68159812,68160954,68162765,68164017,68165951,68166431,	Lamc2	2.24288	0.00158734	1.91028	0.00841346	1.76057	1	1	0	0	0	1	0	0	0	0	0
ctrlafb_g1_1.3.0_00018620	chr13	-	85286436	85315366	85286436	85315366	14	85286436,85292062,85293490,85294410,85297280,85299234,85300471,85301764,85303569,85308586,85308991,85310673,85312036,85315257,	85287028,85292197,85293665,85294550,85297417,85299294,85300569,85301837,85303666,85308647,85309067,85310747,85312178,85315366,	Nuf2	2.51482	1.3e-06	3.01329	0.00501002	3.74304	1	1	0	0	0	1	0	0	0	0	0
ctrlafb_g1_1.3.0_00018732	chr13	-	48997103	49001057	48997103	49001057	4	48997103,48998126,48999513,49000997,	48997605,48998452,48999812,49001057,	Not RefSeq	4.12597	0.000430972	1.55351	0.338195	3.1393	0.150269	1	0	0	0	1	0	0	0	0	0
ctrlafb_g1_1.3.0_00018760	chr13	-	87059656	87080582	87059656	87080582	3	87059656,87061856,87080534,	87060750,87061910,87080582,	Pcp4l1	3.39679	0.00304296	3.21394	0.000811688	0	1	1	1	0	0	0	0	0	1	0	0
ctrlafb_g1_1.3.0_00018772	chr13	-	99095659	99198936	99095659	99198936	8	99095659,99104990,99107431,99107831,99108827,99115518,99146603,99198884,	99099266,99105087,99107528,99107958,99108950,99115547,99147121,99198936,	Disp1	2.60261	8.54e-10	2.86551	0.00159521	23490.5	0.993461	1	1	0	0	0	0	0	1	0	0
ctrlafb_g1_1.3.0_00018796	chr13	+	67808934	67834305	67808934	67834305	14	67808934,67809136,67819083,67819238,67822311,67822438,67823746,67826209,67826530,67827476,67829736,67830092,67831446,67833993,	67809069,67809188,67819132,67819372,67822400,67822497,67823789,67826350,67826598,67827551,67829940,67830203,67831623,67834305,	Ncf2	3.99922	1.43e-10	-1.23883	0.642658	0.132395	0.211924	1	0	0	0	1	0	0	0	0	0
ctrlafb_g1_1.3.0_00018797	chr13	+	67822250	67834305	67822250	67834305	11	67822250,67822438,67823746,67826209,67826530,67827476,67829316,67829789,67830092,67831446,67833993,	67822400,67822497,67823789,67826350,67826598,67827551,67829341,67829940,67830203,67831623,67834305,	Ncf2	4.25329	1.3e-09	-1.23883	0.646633	12.7386	0.162265	1	0	0	0	1	0	0	0	0	0
ctrlafb_g1_1.3.0_00018840	chr13	-	68151074	68216295	68151074	68216295	24	68151074,68155456,68155646,68157895,68159059,68159663,68160810,68162616,68163938,68165746,68166243,68168927,68170778,68172560,68173323,68174405,68178203,68179755,68181128,68183624,68187942,68192890,68210587,68216262,	68152604,68155555,68155804,68158094,68159173,68159812,68160954,68162765,68164017,68165951,68166399,68169075,68171023,68172742,68173541,68174517,68178392,68179877,68181264,68183722,68188077,68193078,68210786,68216295,	Lamc2	2.33507	0.00122553	1.6686	0.0114527	3.38553	1	1	0	0	0	1	0	0	0	0	0
ctrlafb_g1_1.3.0_00018876	chr13	-	105920242	105928826	105920242	105928826	5	105920242,105924812,105926701,105928096,105928670,	105921414,105924990,105927177,105928251,105928826,	Cenpf	2.54355	7.08e-05	1.39292	0.0911285	3.25356	0.433341	1	0	0	0	1	0	0	0	0	0
ctrlafb_g1_1.3.0_00018984	chr14	+	18214005	18237083	18214005	18237083	5	18214005,18226856,18231867,18233550,18235207,	18214104,18226973,18232013,18233662,18237083,	Btc	2.53807	0.00472465	1.34112	0.256481	2.61794	0.0514486	1	0	0	0	1	0	0	0	0	0
ctrlafb_g1_1.3.0_00019044	chr14	+	36959920	36974916	36959920	36974916	6	36959920,36963216,36967180,36968067,36968535,36971981,	36959974,36963425,36967365,36968258,36968666,36974916,	Sgcb	4.04825	1.79e-10	1.01872	0.307923	3.73914	0.000105116	1	0	1	0	0	0	0	0	1	0
ctrlafb_g1_1.3.0_00019112	chr14	+	72122986	72230452	72122986	72230452	27	72122986,72132218,72165781,72172411,72183793,72185838,72187254,72190261,72194197,72195071,72198293,72200763,72206554,72208233,72210143,72211765,72213042,72214493,72216246,72218311,72219563,72220811,72222388,72222963,72223393,72228983,72229568,	72123052,72132588,72165836,72172616,72183913,72185901,72187343,72190478,72194271,72195134,72198452,72200915,72206677,72208336,72210227,72211911,72213113,72214585,72216299,72218391,72219631,72220903,72222503,72222986,72223461,72229022,72230452,	Prom1	4.29719	0.000213808	2.30136	0.0066385	157258	0.997954	1	0	0	0	1	0	0	0	0	0
ctrlafb_g1_1.3.0_00019113	chr14	+	72123418	72230452	72123418	72230452	25	72123418,72132218,72165781,72172411,72183793,72185838,72187254,72190261,72194197,72195071,72198293,72200763,72206554,72208233,72210143,72211765,72213042,72214493,72216246,72218311,72219563,72220811,72222388,72228983,72229568,	72123475,72132588,72165836,72172616,72183913,72185901,72187343,72190478,72194271,72195134,72198452,72200915,72206677,72208336,72210227,72211911,72213113,72214585,72216299,72218391,72219631,72220903,72222503,72229022,72230452,	Prom1	4.01273	0.000703084	2.30136	0.0041543	-0.0521284	0.194343	1	1	0	0	0	0	0	1	0	0
ctrlafb_g1_1.3.0_00019129	chr14	+	79020120	79060046	79020120	79060046	21	79020120,79024277,79029585,79032106,79033820,79034908,79036417,79038457,79040532,79041314,79043262,79045121,79046127,79047898,79049298,79050451,79052314,79056136,79057471,79058272,79058701,	79020359,79024396,79029668,79032353,79033904,79035006,79036554,79038615,79040748,79041462,79043360,79045333,79046236,79048108,79049504,79050595,79052425,79056262,79057564,79058383,79060046,	Evc	2.67901	3.44e-10	1.77032	0.00139916	2.06099	1	1	0	0	0	1	0	0	0	0	0
ctrlafb_g1_1.3.0_00019139	chr14	+	79968072	80344330	79968072	80344330	27	79968072,80118454,80204096,80280434,80287141,80289847,80292515,80295703,80302528,80307958,80310823,80312227,80314345,80315361,80318039,80319141,80319861,80324029,80329804,80332195,80333420,80334610,80335436,80336760,80337350,80340086,80342126,	79968645,80118521,80204195,80280598,80287214,80289911,80292633,80295792,80302707,80308104,80310925,80312303,80314436,80315468,80318159,80319274,80319989,80324200,80329990,80332328,80333543,80334722,80335561,80336859,80337452,80340189,80344330,	Sorcs2	4.8673	4.39e-05	-1.13124	0.605578	4.815	0.022181	1	0	0	0	1	0	0	0	0	0
ctrlafb_g1_1.3.0_00019197	chr14	+	84840815	84845228	84840815	84845228	9	84840815,84841510,84842732,84842998,84843515,84843990,84844261,84844451,84844690,	84840985,84841580,84842916,84843130,84843638,84844103,84844343,84844545,84845228,	Gatsl3	2.52533	0.00130198	1.16145	0.662228	2.25784	0.252256	1	0	0	0	1	0	0	0	0	0
ctrlafb_g1_1.3.0_00019374	chr14	-	15126332	15131368	15126332	15131368	4	15126332,15127378,15129557,15131286,	15127123,15127458,15129689,15131368,	Cxcl13	4.53558	0.00113284	1.68613	0.0181782	5.42667	0.37162	1	0	0	0	1	0	0	0	0	0
ctrlafb_g1_1.3.0_00019542	chr14	-	78915869	79018416	78915869	79018416	20	78915869,78919038,78921981,78923698,78925404,78950583,78965257,78965678,78970327,78973832,78976812,78979179,78985498,78992997,78999148,79006267,79006990,79010026,79011245,79018179,	78916491,78919139,78922183,78923785,78925615,78950810,78965373,78965882,78970781,78973991,78976987,78979418,78985822,78993136,78999282,79006320,79007099,79010212,79011313,79018416,	Evc2	4.35745	0.000235004	1.31169	0.0696787	2.4636	0.562509	1	0	0	0	1	0	0	0	0	0
ctrlafb_g1_1.3.0_00019584	chr14	-	82746461	82754691	82746461	82754691	13	82746461,82746864,82747066,82748692,82749351,82749473,82749909,82750091,82751070,82751490,82753023,82753827,82754603,	82746677,82746984,82747172,82748852,82749394,82749549,82750010,82750178,82751179,82751542,82753467,82753908,82754691,	Tacc3	2.00992	8.65e-05	1.89765	0.0243902	2.33766	0.298993	1	0	0	0	1	0	0	0	0	0
ctrlafb_g1_1.3.0_00019585	chr14	-	82746461	82760864	82746461	82760864	15	82746461,82746864,82747066,82748692,82749351,82749473,82749909,82750091,82751070,82751490,82753023,82753827,82757421,82757694,82760731,	82746677,82746984,82747172,82748852,82749393,82749543,82750010,82750178,82751179,82751542,82753467,82753908,82757563,82757856,82760864,	Tacc3	2.01338	0.000159362	1.89765	0.0218845	0	1	1	0	0	0	1	0	0	0	0	0
ctrlafb_g1_1.3.0_00019644	chr14	-	86535757	86541920	86535757	86541920	11	86535757,86536238,86536609,86536954,86537233,86537557,86537848,86538292,86538590,86540421,86541902,	86535993,86536339,86536736,86537111,86537313,86537755,86537962,86538415,86538711,86540697,86541920,	Pold2	2.16393	0.000115143	-1.30463	0.569161	1.85738	0.161338	1	0	0	0	1	0	0	0	0	0
ctrlafb_g1_1.3.0_00019793	chr14	+	79020106	79060219	79020106	79060219	21	79020106,79024277,79029585,79032106,79033820,79034908,79036417,79038457,79040532,79041314,79043262,79045121,79046127,79047898,79049298,79050451,79052314,79056136,79057471,79058272,79058740,	79020359,79024396,79029668,79032353,79033904,79035006,79036554,79038615,79040748,79041462,79043360,79045333,79046236,79048108,79049504,79050595,79052425,79056262,79057564,79058383,79060219,	Evc	2.66916	4.21e-10	1.77032	0.000396197	7.48021	1	1	0	0	0	1	0	0	0	0	0
ctrlafb_g1_1.3.0_00019921	chr14	-	82746390	82760896	82746390	82760896	15	82746390,82746864,82747066,82748692,82749351,82749473,82749909,82750091,82751070,82751490,82753023,82753827,82757421,82757694,82760731,	82746677,82746984,82747172,82748852,82749394,82749549,82750010,82750178,82751179,82751542,82753467,82753908,82757563,82757856,82760896,	Tacc3	2.01338	0.000159362	1.89765	0.0244538	2.15516	0.0753229	1	0	0	0	1	0	0	0	0	0
ctrlafb_g1_1.3.0_00019922	chr14	-	82748697	82753486	82748697	82753486	8	82748697,82749351,82749473,82749909,82750091,82751070,82751490,82753023,	82748850,82749394,82749549,82750010,82750178,82751179,82751542,82753486,	Tacc3	2.06881	0.00109071	1.89765	0.0234546	1.4011	0.879966	1	0	0	0	1	0	0	0	0	0
ctrlafb_g1_1.3.0_00019939	chr14	-	86535757	86541920	86535757	86541920	11	86535757,86536238,86536609,86536954,86537233,86537557,86537848,86538292,86538590,86540421,86541902,	86535993,86536351,86536736,86537111,86537313,86537755,86537962,86538415,86538711,86540697,86541920,	Pold2	2.16393	0.000115143	-1.30463	0.566234	1.51274	0.847845	1	0	0	0	1	0	0	0	0	0
ctrlafb_g1_1.3.0_00020401	chr14	+	36963141	36974916	36963141	36974916	5	36963141,36967180,36968067,36968535,36971981,	36963425,36967365,36968258,36968666,36974916,	Sgcb	4.04019	4.9e-11	1.01872	0.325506	0.204555	0.13176	1	0	0	0	1	0	0	0	0	0
ctrlafb_g1_1.3.0_00020422	chr14	+	72122986	72230452	72122986	72230452	25	72122986,72132218,72165781,72172411,72183793,72185838,72187254,72190261,72194197,72195071,72198293,72200763,72206554,72208233,72210143,72211765,72213042,72214493,72216246,72218311,72219563,72220811,72222388,72228983,72229568,	72123052,72132588,72165836,72172616,72183913,72185901,72187343,72190478,72194271,72195134,72198404,72200915,72206677,72208336,72210227,72211911,72213113,72214585,72216299,72218391,72219631,72220903,72222503,72229022,72230452,	Prom1	4.20651	0.00033719	2.30136	0.00643475	0.123473	0.215554	1	0	0	0	1	0	0	0	0	0
ctrlafb_g1_1.3.0_00020423	chr14	+	72123444	72230452	72123444	72230452	27	72123444,72132218,72165781,72172411,72183793,72185838,72187254,72190261,72194197,72195071,72198293,72200763,72206554,72208233,72210143,72211765,72213042,72214493,72216246,72218311,72219563,72220811,72222388,72222963,72223393,72228983,72229568,	72123475,72132588,72165836,72172616,72183913,72185901,72187343,72190478,72194271,72195134,72198452,72200915,72206677,72208336,72210227,72211911,72213113,72214585,72216299,72218391,72219631,72220903,72222503,72222986,72223461,72229022,72230452,	Prom1	4.08681	0.000556359	2.30136	0.00685208	-1.19901	0.894267	1	0	0	0	1	0	0	0	0	0
ctrlafb_g1_1.3.0_00020426	chr14	+	79045590	79060219	79045590	79060219	9	79045590,79047898,79049298,79050451,79052314,79056136,79057471,79058272,79058701,	79046236,79048108,79049504,79050595,79052425,79056262,79057564,79058383,79060219,	Evc	2.59971	2.59e-09	3.12828	0.000800641	1.97386	1	1	1	0	0	0	0	0	1	0	0
ctrlafb_g1_1.3.0_00020612	chr14	+	84840815	84845228	84840815	84845228	8	84840815,84841510,84842732,84843515,84843990,84844261,84844451,84844690,	84840985,84841580,84843130,84843638,84844103,84844343,84844545,84845228,	Gatsl3	2.503	0.00138062	1.16145	0.666866	4.1128	0.519168	1	0	0	0	1	0	0	0	0	0
ctrlafb_g1_1.3.0_00020613	chr14	+	84888333	84891416	84888333	84891416	3	84888333,84889469,84890220,	84888375,84889647,84891416,	Lif	12.0745	1.06e-05	-1.90039	0.0983017	7.99236	0.141066	1	0	0	0	1	0	0	0	0	0
ctrlafb_g1_1.3.0_00020664	chr14	-	78915776	78999379	78915776	78999379	15	78915776,78919038,78921981,78923698,78925404,78950583,78965257,78965678,78970327,78973832,78976812,78979179,78985498,78992997,78999148,	78916491,78919139,78922183,78923785,78925615,78950810,78965373,78965882,78970781,78973991,78976987,78979418,78985822,78993136,78999379,	Evc2	4.50544	0.00019912	1.31169	0.0797189	0.0516234	0.213683	1	0	0	0	1	0	0	0	0	0
ctrlafb_g1_1.3.0_00020735	chr14	+	79020120	79044889	79020120	79044889	12	79020120,79024277,79029585,79032106,79033820,79034908,79036417,79038457,79040532,79041314,79043262,79044868,	79020359,79024396,79029668,79032353,79033904,79035006,79036554,79038615,79040748,79041462,79043360,79044889,	Evc	2.941	7.91e-05	1.00183	0.988157	5.19052	1	1	0	0	0	1	0	0	0	0	0
ctrlafb_g1_1.3.0_00020736	chr14	+	79050416	79060046	79050416	79060046	6	79050416,79052314,79056136,79057471,79058272,79058740,	79050595,79052425,79056262,79057564,79058383,79060046,	Evc	2.49565	4.77e-08	3.12828	0.00201776	12.8045	1	1	1	0	0	0	0	0	1	0	0
ctrlafb_g1_1.3.0_00020804	chr14	-	61839519	61930746	61839519	61930746	16	61839519,61842127,61846239,61851091,61853074,61869182,61887359,61890190,61913389,61916609,61924586,61926089,61926985,61929070,61929342,61930655,	61840459,61842197,61846354,61851182,61853183,61869214,61887403,61890274,61913451,61916683,61924698,61926127,61927057,61929180,61929388,61930746,	Tbc1d19	2.00144	0.00089764	2.44198	0.0161991	33355.3	1	1	0	0	0	1	0	0	0	0	0
ctrlafb_g1_1.3.0_00020816	chr14	-	82746461	82754634	82746461	82754634	12	82746461,82746864,82747066,82748692,82749351,82749909,82750105,82751070,82751490,82753023,82753827,82754603,	82746677,82746984,82747172,82748852,82749549,82750010,82750178,82751179,82751542,82753467,82753908,82754634,	Tacc3	2.01706	5.92e-05	1.89765	0.0220676	1.53341	0.887931	1	0	0	0	1	0	0	0	0	0
ctrlafb_g1_1.3.0_00020817	chr14	-	82747995	82760891	82747995	82760891	12	82747995,82749351,82749473,82749909,82750091,82751070,82751490,82753023,82753827,82757421,82757694,82760731,	82748852,82749394,82749549,82750010,82750178,82751179,82751542,82753467,82753908,82757563,82757856,82760891,	Tacc3	2.00596	0.000588794	1.89765	0.025035	1.83418	0.580812	1	0	0	0	1	0	0	0	0	0
ctrlafb_g1_1.3.0_00020862	chr14	+	36962737	36974916	36962737	36974916	6	36962737,36963220,36967180,36968067,36968535,36971981,	36962781,36963425,36967365,36968258,36968666,36974916,	Sgcb	4.03263	7.63e-11	1.01872	0.314127	10976.5	0.990091	1	0	0	0	1	0	0	0	0	0
ctrlafb_g1_1.3.0_00020878	chr14	+	79052259	79060046	79052259	79060046	5	79052259,79056136,79057471,79058272,79058740,	79052425,79056262,79057564,79058383,79060046,	Evc	2.49489	8.51e-08	3.12828	0.00245098	1.77661	1	1	1	0	0	0	0	0	1	0	0
ctrlafb_g1_1.3.0_00020909	chr14	-	15126332	15131375	15126332	15131375	4	15126332,15127378,15129557,15131286,	15127126,15127458,15129689,15131375,	Cxcl13	4.53558	0.00113284	1.68613	0.0184231	4.02475	0.234207	1	0	0	0	1	0	0	0	0	0
ctrlafb_g1_1.3.0_00020929	chr14	-	78915869	78985923	78915869	78985923	13	78915869,78919038,78921981,78923698,78925404,78950583,78965257,78965678,78970327,78973832,78976812,78979179,78985498,	78916491,78919139,78922183,78923785,78925615,78950810,78965373,78965882,78970781,78973991,78976987,78979418,78985923,	Evc2	4.27155	0.000547331	1.31169	0.0763107	3.22291	0.435789	1	0	0	0	1	0	0	0	0	0
ctrlafb_g1_1.3.0_00020947	chr14	-	86535757	86541930	86535757	86541930	10	86535757,86536238,86536609,86536954,86537233,86537557,86538292,86538590,86540421,86541902,	86535993,86536339,86536736,86537111,86537313,86537962,86538415,86538711,86540697,86541930,	Pold2	2.16733	8.35e-05	-1.30463	0.581183	5.5143	0.286819	1	0	0	0	1	0	0	0	0	0
ctrlafb_g1_1.3.0_00020962	chr15	+	2614864	2630230	2614864	2630230	8	2614864,2615838,2617304,2620249,2620921,2623735,2628304,2629775,	2615034,2616056,2617511,2620340,2621124,2623908,2628524,2630230,	Dusp13	19.2489	4.27e-17	6.08909	0.000202675	7.80666	1	1	1	0	0	0	0	0	1	0	0
ctrlafb_g1_1.3.0_00020963	chr15	+	2622557	2630230	2622557	2630230	4	2622557,2623735,2628304,2629775,	2622978,2623908,2628524,2630230,	Dusp13	23.9842	1.39e-10	18.3379	0.000197941	0.0435302	1	1	1	0	0	0	0	0	1	0	0
ctrlafb_g1_1.3.0_00021068	chr15	+	32270196	32273866	32270196	32273866	4	32270196,32271865,32272726,32273411,	32270487,32271909,32272833,32273866,	Not RefSeq	2.13245	0.000884708	3.02541	0.00928543	-20918.3	0.99697	1	0	0	0	1	0	0	0	0	0
ctrlafb_g1_1.3.0_00021168	chr15	+	45227251	45238096	45227251	45238096	8	45227251,45230224,45231480,45232512,45233268,45234563,45236700,45237305,	45227479,45230301,45231555,45232654,45233437,45234692,45236876,45238096,	Pbk	4.82258	7.58e-13	4.95633	0.00180072	3.51014	1	1	1	0	0	0	0	0	1	0	0
ctrlafb_g1_1.3.0_00021182	chr15	+	47636294	47641487	47636294	47641487	4	47636294,47638346,47638854,47639708,	47637414,47638470,47639173,47641487,	Nefl	247.178	2.08e-13	4.77291	0.000199045	60.0613	0.00181131	1	1	1	1	0	0	0	0	0	0
ctrlafb_g1_1.3.0_00021241	chr15	+	66391901	66482530	66391901	66482530	7	66391901,66392105,66394663,66424707,66424899,66480692,66481547,	66392034,66394612,66394737,66424765,66425071,66481370,66482530,	Pcdh17	4.84591	0.000477402	2.34106	0.0773052	0	1	1	0	0	0	1	0	0	0	0	0
ctrlafb_g1_1.3.0_00021242	chr15	+	66391901	66483800	66391901	66483800	6	66391901,66392105,66394663,66424707,66424899,66480692,	66392034,66394612,66394737,66424765,66425071,66483800,	Pcdh17	3.64328	0.00118031	2.34106	0.0790419	2.61194	0.176782	1	0	0	0	1	0	0	0	0	0
ctrlafb_g1_1.3.0_00021353	chr15	-	21500775	21569296	21500775	21569296	12	21500775,21507646,21508658,21510843,21514919,21516362,21520933,21524544,21528144,21529714,21538302,21568466,	21501728,21507837,21508910,21510992,21514994,21516624,21521039,21524650,21528291,21529842,21538475,21569296,	Ddhd1	-2.56182	0.000897622	-1.72851	0.0476763	-2.24473	1	1	0	0	0	1	0	0	0	0	0
ctrlafb_g1_1.3.0_00021354	chr15	-	21500894	21569296	21500894	21569296	14	21500894,21505013,21507646,21508658,21510843,21514919,21516362,21520933,21524544,21528144,21529714,21531880,21538302,21568466,	21501728,21505096,21507837,21508910,21510992,21514994,21516624,21521039,21524650,21528291,21529842,21531981,21538475,21569296,	Ddhd1	-2.58006	0.000759369	-1.72851	0.0609319	-3.14988	1	1	0	0	0	1	0	0	0	0	0
ctrlafb_g1_1.3.0_00021355	chr15	-	21499250	21569296	21499250	21569296	13	21499250,21505013,21507646,21508658,21510843,21514919,21516362,21520933,21524544,21528144,21529714,21538302,21568466,	21501728,21505096,21507837,21508910,21510992,21514994,21516624,21521039,21524650,21528291,21529842,21538475,21569296,	Ddhd1	-2.59256	0.000721	-1.72851	0.0523686	-2.90178	1	1	0	0	0	1	0	0	0	0	0
ctrlafb_g1_1.3.0_00021365	chr15	-	23340955	23375755	23340955	23375755	19	23340955,23342390,23343413,23344534,23347055,23348576,23351362,23353060,23354387,23359161,23359769,23361862,23362974,23368829,23369046,23370423,23370685,23373420,23375708,	23341308,23342436,23343653,23344594,23347232,23348795,23351454,23353220,23354472,23359287,23359863,23362118,23363044,23368954,23369130,23370485,23370872,23373655,23375755,	Dlgap5	2.57844	7.72e-05	2.00303	0.015024	2.96075	0.0775142	1	0	0	0	1	0	0	0	0	0
ctrlafb_g1_1.3.0_00021478	chr15	-	36320075	36440579	36320075	36440579	8	36320075,36321059,36329542,36345378,36354604,36401577,36424853,36440476,	36320581,36321165,36329647,36345572,36354765,36401703,36424960,36440579,	Cryl1	2.97507	0.000597833	2.21994	0.0286401	3.10968	1.0199e-06	1	0	1	0	0	0	0	0	1	0
ctrlafb_g1_1.3.0_00021551	chr15	-	47225711	47271412	47225711	47271412	15	47225711,47229860,47246055,47247215,47248843,47250063,47250782,47252173,47259416,47260925,47262698,47268996,47270700,47270962,47271241,	47227420,47230020,47246194,47247300,47248918,47250298,47250851,47252381,47259491,47261091,47262848,47269150,47270873,47271025,47271412,	Cdca2	2.94417	1.16e-06	1.7077	0.00509892	2.56633	1	1	0	0	0	1	0	0	0	0	0
ctrlafb_g1_1.3.0_00021552	chr15	-	47225463	47271412	47225463	47271412	15	47225463,47229860,47246063,47247215,47248843,47250063,47250782,47252173,47259416,47260925,47262698,47268996,47270700,47270962,47271241,	47227420,47230031,47246194,47247300,47248918,47250298,47250851,47252381,47259491,47261091,47262848,47269150,47270873,47271025,47271412,	Cdca2	2.97944	9.01e-07	1.7077	0.00594648	2.34709	1	1	0	0	0	1	0	0	0	0	0
ctrlafb_g1_1.3.0_00021555	chr15	-	47698372	47703341	47698372	47703341	3	47698372,47701619,47702242,	47700200,47701743,47703341,	Nefm	51.7046	1.03e-12	12.4014	0.000200884	0.647847	0.00210933	1	1	0	0	0	0	0	1	0	0
ctrlafb_g1_1.3.0_00021778	chr15	-	21500775	21533893	21500775	21533893	11	21500775,21507646,21508658,21510843,21514919,21516362,21520933,21524544,21528144,21529714,21531880,	21501728,21507837,21508910,21510992,21514994,21516624,21521039,21524650,21528291,21529842,21533893,	Ddhd1	-2.6561	0.000922733	-1.72851	0.0518176	-2.99848	1	1	0	0	0	1	0	0	0	0	0
ctrlafb_g1_1.3.0_00021779	chr15	-	21500775	21532632	21500775	21532632	12	21500775,21505013,21507646,21508658,21510843,21514919,21516362,21520933,21524544,21528144,21529714,21531880,	21501728,21505096,21507837,21508910,21510992,21514994,21516620,21521039,21524650,21528291,21529842,21532632,	Ddhd1	-2.61815	0.00072686	-1.72851	0.0559244	-2.37599	1	1	0	0	0	1	0	0	0	0	0
ctrlafb_g1_1.3.0_00022133	chr15	-	21498946	21532305	21498946	21532305	12	21498946,21505013,21507646,21508658,21510843,21514919,21516362,21520933,21524544,21528144,21529714,21531880,	21501728,21505096,21507837,21508910,21510992,21514994,21516624,21521039,21524650,21528291,21529842,21532305,	Ddhd1	-2.64157	0.000503327	-1.72851	0.0513238	-6.40812	1	1	0	0	0	1	0	0	0	0	0
ctrlafb_g1_1.3.0_00022161	chr15	-	36320134	36440579	36320134	36440579	8	36320134,36321059,36329542,36345378,36354604,36401577,36424853,36440480,	36320581,36321165,36329647,36345572,36354765,36401703,36424960,36440579,	Cryl1	2.96485	0.000627842	2.21994	0.0353013	1.20993	0.827834	1	0	0	0	1	0	0	0	0	0
ctrlafb_g1_1.3.0_00022216	chr15	+	2623615	2630619	2623615	2630619	3	2623615,2628304,2629775,	2623908,2628524,2630619,	Dusp13	30.4746	2.53e-11	18.3379	0.000600601	0	1	1	1	0	0	0	0	0	1	0	0
ctrlafb_g1_1.3.0_00022217	chr15	+	2628014	2630619	2628014	2630619	2	2628014,2629775,	2628524,2630619,	Dusp13	32.7258	1.18e-09	18.3379	0.000199641	7.1301	1	1	1	0	0	0	0	0	1	0	0
ctrlafb_g1_1.3.0_00022241	chr15	+	32224225	32273843	32224225	32273843	5	32224225,32270230,32271865,32272726,32273411,	32224275,32270487,32271909,32272833,32273843,	Not RefSeq	2.12446	0.000946744	3.02541	0.00778598	314.768	0.834443	1	0	0	0	1	0	0	0	0	0
ctrlafb_g1_1.3.0_00022242	chr15	+	32244522	32273843	32244522	32273843	5	32244522,32270230,32271865,32272726,32273411,	32244564,32270487,32271909,32272833,32273843,	Not RefSeq	2.11715	0.000980463	3.02541	0.00893212	1.52224	0.717609	1	0	0	0	1	0	0	0	0	0
ctrlafb_g1_1.3.0_00022388	chr15	+	22617407	22628727	22617407	22628727	8	22617407,22619480,22621403,22621880,22624373,22626083,22626998,22628553,	22617478,22619562,22621458,22621924,22624595,22626114,22627101,22628727,	Cdkn3	3.56177	6.39e-06	1.29003	0.145519	3.08914	0.0545796	1	0	0	0	1	0	0	0	0	0
ctrlafb_g1_1.3.0_00022542	chr15	+	45230192	45238323	45230192	45238323	7	45230192,45231480,45232512,45233268,45234563,45236700,45237305,	45230301,45231555,45232654,45233437,45234692,45236876,45238323,	Pbk	4.7613	8.02e-13	4.95633	0.000816827	0	1	1	1	0	0	0	0	0	1	0	0
ctrlafb_g1_1.3.0_00022559	chr15	+	66391672	66482547	66391672	66482547	5	66391672,66394663,66424707,66424899,66480692,	66394612,66394737,66424765,66425071,66482547,	Pcdh17	4.99283	5.28e-05	2.34106	0.0751776	16.1057	0.29371	1	0	0	0	1	0	0	0	0	0
ctrlafb_g1_1.3.0_00022609	chr15	-	47225701	47263115	47225701	47263115	12	47225701,47229860,47246055,47247215,47248843,47250063,47250782,47252173,47259416,47260925,47262698,47263073,	47227420,47230020,47246194,47247300,47248918,47250298,47250851,47252381,47259491,47261091,47262848,47263115,	Cdca2	3.0564	1.48e-05	1.7077	0.00337704	0.226948	1	1	0	0	0	1	0	0	0	0	0
ctrlafb_g1_1.3.0_00022643	chr15	+	2620884	2630230	2620884	2630230	4	2620884,2623735,2628304,2629775,	2621124,2623908,2628524,2630230,	Dusp13	28.089	1.47e-12	18.3379	0.000203957	149023	1	1	1	0	0	0	0	0	1	0	0
ctrlafb_g1_1.3.0_00022657	chr15	+	32240611	32273866	32240611	32273866	5	32240611,32270230,32271865,32272726,32273411,	32240658,32270487,32271909,32272833,32273866,	Not RefSeq	2.11729	0.000981125	3.02541	0.00594295	1.82178	0.0490825	1	0	0	0	1	0	0	0	0	0
ctrlafb_g1_1.3.0_00022667	chr15	+	45227492	45238096	45227492	45238096	8	45227492,45230224,45231480,45232512,45233268,45234563,45236700,45237305,	45227536,45230301,45231555,45232654,45233437,45234692,45236876,45238096,	Pbk	4.7529	3.96e-12	4.95633	0.000798563	5.99924	1	1	1	0	0	0	0	0	1	0	0
ctrlafb_g1_1.3.0_00022673	chr15	+	66391673	66482558	66391673	66482558	6	66391673,66394663,66424707,66424899,66480692,66481547,	66394612,66394737,66424765,66425071,66481370,66482558,	Pcdh17	4.94135	7.32e-05	2.34106	0.0741622	0	1	1	0	0	0	1	0	0	0	0	0
ctrlafb_g1_1.3.0_00022708	chr15	-	36320128	36426822	36320128	36426822	8	36320128,36321059,36329542,36345378,36354604,36401577,36424853,36426792,	36320581,36321165,36329647,36345572,36354765,36401703,36424960,36426822,	Cryl1	2.96217	0.000630757	2.21994	0.0378443	4.07056	0.0375225	1	0	0	0	1	0	0	0	0	0
ctrlafb_g1_1.3.0_00022721	chr15	-	47225463	47260234	47225463	47260234	10	47225463,47229860,47246063,47247215,47248843,47250063,47250782,47252173,47259416,47260121,	47227420,47230031,47246194,47247300,47248918,47250298,47250851,47252381,47259491,47260234,	Cdca2	3.2329	1.79e-05	1.7077	0.00394945	0	1	1	0	0	0	1	0	0	0	0	0
ctrlafb_g1_1.3.0_00022826	chr16	+	9715644	9730579	9715644	9730579	12	9715644,9719265,9720361,9721551,9722255,9723101,9723592,9724113,9724438,9726089,9727381,9729691,	9715680,9719355,9720455,9721664,9722345,9723180,9723651,9724206,9724533,9726147,9727503,9730579,	Anxa8	3.54302	0.000911053	1.3848	0.230108	2.87116	0.496378	1	0	0	0	1	0	0	0	0	0
ctrlafb_g1_1.3.0_00022833	chr16	+	10473353	11202161	10473353	11202161	13	10473353,10475770,10602542,10707958,10929404,10994852,11008944,11010598,11147400,11183818,11190616,11201422,11201945,	10473568,10475925,10602826,10708163,10929457,10995022,11009105,11010717,11147597,11183984,11190856,11201932,11202161,	Grid1	19.2046	0.000724718	1.16409	0.370582	4.96986	0.079292	1	0	0	0	1	0	0	0	0	0
ctrlafb_g1_1.3.0_00023009	chr16	+	63937758	64130691	63937758	64130691	12	63937758,63983496,63992347,63998503,64001543,64093864,64105677,64116892,64118509,64120809,64121676,64124538,	63938239,63983673,63992468,63998553,64001593,64093993,64105735,64116994,64118635,64120939,64121879,64130691,	Nrg1	2.38021	1.74e-07	3.00719	0.00586969	0.404166	0.00909465	1	0	0	0	1	0	0	0	0	0
ctrlafb_g1_1.3.0_00023062	chr16	+	74492221	74518743	74492221	74518743	9	74492221,74499756,74501315,74501474,74503062,74503870,74505759,74508479,74517982,	74492329,74499837,74501387,74502309,74503266,74504040,74505828,74508719,74518743,	Ckap2	5.62694	2.62e-07	5.74877	0.00221908	2.29203	0.424946	1	1	0	0	0	0	0	1	0	0
ctrlafb_g1_1.3.0_00023078	chr16	+	77485218	78605039	77485218	78605039	68	77485218,77798143,77815635,78020155,78056298,78124645,78159484,78171083,78232149,78247663,78294472,78295281,78297097,78302812,78305824,78310550,78320502,78322524,78327497,78333750,78338717,78366722,78367814,78385325,78411334,78417694,78421132,78425169,78428290,78432114,78433429,78440829,78442077,78443393,78452557,78465555,78469776,78475006,78479835,78493382,78500786,78502838,78503598,78504611,785…	77485332,77798337,77815842,78020267,78056375,78124732,78159608,78171204,78232252,78247775,78294654,78295607,78297291,78302950,78306011,78310738,78320618,78322739,78327685,78333919,78338873,78366913,78367940,78385527,78411525,78417832,78421319,78425363,78428406,78432227,78433524,78441032,78442201,78443489,78452661,78465673,78469845,78475124,78480042,78493570,78500963,78502983,78503678,78504724,785…	Csmd1	25.4956	5.54e-124	1.86569	0.0294466	0	1	1	0	0	0	1	0	0	0	0	0
ctrlafb_g1_1.3.0_00023079	chr16	+	78541344	78605039	78541344	78605039	20	78541344,78549956,78563762,78565195,78567404,78569995,78571162,78574635,78575350,78578035,78578811,78580648,78584148,78586009,78587429,78590330,78593215,78594074,78596978,78602434,	78541574,78550129,78563935,78565368,78567592,78570168,78571344,78574811,78575529,78578208,78578984,78580721,78584259,78586188,78587473,78590491,78593327,78594161,78597110,78605039,	Csmd1	24.1643	1.38e-117	5.14478	0.000204165	15.8938	1	1	1	0	0	0	0	0	1	0	0
ctrlafb_g1_1.3.0_00023083	chr16	+	80461695	80489957	80461695	80489957	4	80461695,80462335,80486285,80487866,	80461729,80462523,80486382,80489957,	LOC498662	2.35811	3.99e-05	-1.16814	0.661109	0.549872	1	1	0	0	0	1	0	0	0	0	0
ctrlafb_g1_1.3.0_00023282	chr16	-	22533105	22556905	22533105	22556905	10	22533105,22536118,22537337,22538999,22541614,22542536,22543722,22545901,22550071,22556629,	22534522,22536219,22537519,22539119,22541856,22542769,22543833,22546080,22550231,22556905,	Lpl	2.15517	7.36e-09	3.04476	0.00672735	2.26977	0.00528858	1	0	0	0	1	0	0	0	0	0
ctrlafb_g1_1.3.0_00023289	chr16	-	24747183	24756507	24747183	24756507	3	24747183,24749043,24756483,	24748932,24749885,24756507,	Npy1r	10.0365	1.7e-05	1.00785	0.817552	0.155108	0.0422958	1	0	0	0	1	0	0	0	0	0
ctrlafb_g1_1.3.0_00023357	chr16	-	56760904	56929685	56760904	56929685	10	56760904,56768698,56771242,56775563,56806710,56831039,56840253,56844486,56860435,56929360,	56761179,56768788,56771316,56775626,56806799,56831179,56840393,56844603,56860604,56929685,	Tusc3	3.16466	3.64e-06	2.3695	0.00160966	3.33471	0.000723439	1	1	1	1	0	0	0	0	0	0
ctrlafb_g1_1.3.0_00023574	chr16	+	63937664	64106017	63937664	64106017	7	63937664,63983496,63992347,63998503,64001543,64093864,64105677,	63938239,63983673,63992468,63998553,64001593,64093993,64106017,	Nrg1	2.49721	1.69e-07	2.43779	0.00896414	1.83412	0.366166	1	0	0	0	1	0	0	0	0	0
ctrlafb_g1_1.3.0_00023575	chr16	+	63937664	64133713	63937664	64133713	12	63937664,63983496,63992347,63998503,64001543,64093864,64105072,64116892,64118509,64120809,64121676,64124538,	63938239,63983673,63992468,63998553,64001593,64093993,64105139,64116994,64118635,64120939,64121879,64133713,	Nrg1	2.32246	1.36e-06	3.00719	0.00656978	2.11165	0.0371202	1	0	0	0	1	0	0	0	0	0
ctrlafb_g1_1.3.0_00023589	chr16	+	78432030	78605039	78432030	78605039	39	78432030,78433429,78440829,78442077,78443393,78452557,78465555,78469776,78475006,78479835,78493382,78500786,78502838,78503598,78504611,78511201,78514263,78517099,78534553,78541380,78549956,78563762,78565195,78567404,78569995,78571162,78574635,78575350,78578035,78578811,78580648,78584148,78586009,78587429,78590330,78593215,78594074,78596978,78602434,	78432227,78433524,78441032,78442201,78443489,78452661,78465673,78469845,78475124,78480042,78493570,78500963,78502983,78503678,78504724,78511389,78514409,78517287,78534738,78541574,78550129,78563935,78565368,78567592,78570168,78571344,78574811,78575529,78578208,78578984,78580721,78584259,78586188,78587473,78590491,78593327,78594161,78597110,78605039,	Csmd1	25.582	2.84e-124	5.14478	0.000201979	-0.203335	1	1	1	0	0	0	0	0	1	0	0
ctrlafb_g1_1.3.0_00023952	chr16	+	64110771	64129034	64110771	64129034	6	64110771,64116892,64118509,64120809,64121676,64124538,	64110797,64116994,64118635,64120939,64121879,64129034,	Nrg1	2.35809	4.96e-07	3.70959	0.00341571	1.86778	0.179787	1	1	0	0	0	0	0	1	0	0
ctrlafb_g1_1.3.0_00024071	chr16	+	7837198	7859438	7837198	7859438	22	7837198,7838394,7843071,7843528,7843802,7844747,7846322,7848986,7849308,7850749,7851446,7852197,7852751,7853590,7854658,7855714,7856097,7856255,7856477,7857780,7858092,7858851,	7837401,7838564,7843173,7843643,7843956,7844893,7846412,7849165,7849436,7850928,7851598,7852299,7852879,7853740,7854785,7855892,7856168,7856380,7856549,7857943,7858246,7859438,	Ogdhl	18.1801	1.78e-21	2.20988	0.0418764	14999.5	0.996492	1	0	0	0	1	0	0	0	0	0
ctrlafb_g1_1.3.0_00024072	chr16	+	7856079	7859438	7856079	7859438	6	7856079,7856255,7856477,7857780,7858092,7858851,	7856168,7856380,7856549,7857943,7858246,7859438,	Ogdhl	16.9657	4.08e-12	7.07788	0.00101338	15.7977	0.0948045	1	1	0	0	0	0	0	1	0	0
ctrlafb_g1_1.3.0_00024110	chr16	+	63937699	64130631	63937699	64130631	14	63937699,63983496,63992347,63998503,64001543,64093864,64105072,64105677,64116892,64118509,64120809,64121676,64124025,64124538,	63938239,63983673,63992468,63998553,64001593,64093993,64105139,64105735,64116994,64118635,64120939,64121879,64124166,64130631,	Nrg1	2.40209	1.8e-07	3.00719	0.00503119	0.0186372	0.244715	1	0	0	0	1	0	0	0	0	0
ctrlafb_g1_1.3.0_00024123	chr16	+	74508440	74518743	74508440	74518743	2	74508440,74517982,	74508719,74518743,	Ckap2	8.05981	8.07e-08	5.74877	0.00320384	10.6542	0.0247424	1	1	0	0	0	0	0	1	0	0
ctrlafb_g1_1.3.0_00024125	chr16	+	78432009	78605039	78432009	78605039	40	78432009,78432128,78433429,78440829,78442077,78443393,78452557,78465555,78469776,78475006,78479833,78493382,78500786,78502838,78503598,78504611,78511201,78514263,78517099,78534553,78541380,78549956,78563762,78565195,78567404,78569995,78571162,78574635,78575350,78578035,78578811,78580648,78584148,78586009,78587429,78590330,78593215,78594074,78596978,78602434,	78432045,78432227,78433524,78441032,78442201,78443489,78452661,78465673,78469845,78475122,78480042,78493570,78500963,78502983,78503678,78504724,78511389,78514409,78517287,78534738,78541574,78550129,78563935,78565368,78567592,78570168,78571344,78574811,78575529,78578208,78578984,78580721,78584259,78586188,78587473,78590491,78593327,78594161,78597110,78605039,	Csmd1	25.5172	4.3e-124	5.14478	0.000203791	72.8925	1	1	1	0	0	0	0	0	1	0	0
ctrlafb_g1_1.3.0_00024270	chr16	+	63937758	64105781	63937758	64105781	8	63937758,63983496,63992347,63998503,64001543,64093864,64105072,64105677,	63938239,63983673,63992468,63998553,64001593,64093993,64105139,64105781,	Nrg1	2.52264	1.26e-07	2.43779	0.0109192	5.87617	1	1	0	0	0	1	0	0	0	0	0
ctrlafb_g1_1.3.0_00024276	chr16	+	73245840	73257314	73245840	73257314	8	73245840,73246410,73249248,73251043,73254102,73254335,73256785,73256949,	73246019,73246529,73249334,73251081,73254199,73254423,73256875,73257314,	Gins4	2.03287	0.00167627	1.65232	0.00474496	2.24279	0.54897	1	0	0	0	1	0	0	0	0	0
ctrlafb_g1_1.3.0_00024279	chr16	+	78431963	78605039	78431963	78605039	39	78431963,78433429,78440829,78442077,78443393,78452557,78465555,78469776,78475006,78479833,78493382,78500786,78502838,78503598,78504611,78511201,78514263,78517099,78534553,78541380,78549956,78563762,78565195,78567404,78569995,78571162,78574635,78575350,78578035,78578811,78580648,78584148,78586009,78587429,78590330,78593215,78594074,78596978,78602434,	78432227,78433524,78441032,78442201,78443489,78452661,78465673,78469845,78475122,78480042,78493570,78500963,78502983,78503678,78504724,78511389,78514409,78517287,78534738,78541574,78550129,78563935,78565368,78567592,78570168,78571344,78574811,78575529,78578208,78578984,78580721,78584259,78586188,78587473,78590491,78593327,78594161,78597110,78605039,	Csmd1	25.592	2.67e-124	5.14478	0.00019755	5.77905	1	1	1	0	0	0	0	0	1	0	0
ctrlafb_g1_1.3.0_00024281	chr16	+	80485806	80490151	80485806	80490151	3	80485806,80486285,80487866,	80485847,80486382,80490151,	LOC498662	2.19658	0.000151255	-1.16814	0.657916	1.12275	1	1	0	0	0	1	0	0	0	0	0
ctrlafb_g1_1.3.0_00024364	chr16	+	7833651	7859438	7833651	7859438	24	7833651,7835638,7837197,7838394,7843071,7843528,7843802,7844747,7846322,7848986,7849308,7850749,7851446,7852197,7852751,7853590,7854658,7855714,7856097,7856255,7856420,7857780,7858092,7858851,	7833753,7835693,7837401,7838564,7843173,7843643,7843956,7844893,7846412,7849165,7849436,7850928,7851598,7852299,7852879,7853740,7854785,7855892,7856168,7856380,7856549,7857943,7858246,7859438,	Ogdhl	19.2712	2.64e-19	2.20988	0.0383219	19.939	0.000634663	1	0	1	0	0	0	0	0	1	0
ctrlafb_g1_1.3.0_00024366	chr16	+	9714681	9730579	9714681	9730579	12	9714681,9719265,9720361,9721551,9722255,9723101,9723592,9724113,9724438,9726089,9727381,9729691,	9714885,9719355,9720455,9721664,9722345,9723180,9723651,9724206,9724533,9726147,9727503,9730579,	Anxa8	3.47466	0.000991729	1.3848	0.241268	2.90572	0.0863461	1	0	0	0	1	0	0	0	0	0
ctrlafb_g1_1.3.0_00024375	chr16	+	18568409	18570112	18568409	18570112	3	18568409,18568522,18568837,	18568421,18568651,18570112,	Not RefSeq	3.13388	0.00418546	-1.27696	0.54672	3.08718	0.128531	1	0	0	0	1	0	0	0	0	0
ctrlafb_g1_1.3.0_00024411	chr16	+	63937664	64133713	63937664	64133713	13	63937664,63983496,63992347,63998503,64001543,64093864,64105072,64116892,64118509,64120809,64121676,64124025,64124538,	63938239,63983673,63992468,63998553,64001593,64093993,64105139,64116994,64118635,64120939,64121879,64124166,64133713,	Nrg1	2.32786	1.34e-06	3.00719	0.00588355	0	1	1	0	0	0	1	0	0	0	0	0
ctrlafb_g1_1.3.0_00024421	chr16	+	77485218	78605039	77485218	78605039	68	77485218,77798143,77815635,78020155,78056298,78124645,78159484,78171083,78232149,78247663,78294472,78295281,78297097,78302812,78305824,78310550,78320502,78322524,78327497,78333750,78338717,78366722,78367814,78385325,78411334,78417694,78421132,78425169,78428290,78432114,78433429,78440829,78442077,78443393,78452557,78465555,78469776,78475006,78479833,78493382,78500786,78502838,78503598,78504611,785…	77485332,77798337,77815842,78020267,78056375,78124732,78159608,78171204,78232252,78247775,78294654,78295607,78297291,78302950,78306011,78310738,78320618,78322739,78327685,78333919,78338873,78366913,78367940,78385527,78411525,78417832,78421319,78425363,78428406,78432227,78433524,78441032,78442201,78443489,78452661,78465673,78469845,78475122,78480042,78493570,78500963,78502983,78503678,78504724,785…	Csmd1	25.503	5.28e-124	1.86569	0.0255371	0.00443529	1	1	0	0	0	1	0	0	0	0	0
ctrlafb_g1_1.3.0_00024488	chr16	-	73029591	73061668	73029591	73061668	2	73029591,73061618,	73031955,73061668,	Not RefSeq	2.96301	1.25e-06	1.27797	0.431672	2.89591	0.020809	1	0	0	0	1	0	0	0	0	0
ctrlafb_g1_1.3.0_00024518	chr16	+	7837198	7859438	7837198	7859438	21	7837198,7838394,7843071,7843528,7843802,7844747,7846322,7848986,7849308,7850749,7851446,7852197,7852751,7853590,7854658,7855714,7856097,7856255,7857780,7858092,7858851,	7837401,7838564,7843173,7843643,7843956,7844893,7846412,7849165,7849436,7850928,7851598,7852299,7852879,7853740,7854785,7855892,7856168,7856549,7857943,7858246,7859438,	Ogdhl	18.2574	3.64e-21	2.20988	0.0388036	0.0301024	0.283124	1	0	0	0	1	0	0	0	0	0
ctrlafb_g1_1.3.0_00024552	chr16	+	63937747	64128859	63937747	64128859	13	63937747,63983496,63992347,63998503,64001543,64093864,64105677,64116892,64118509,64120809,64121676,64124025,64124538,	63938239,63983673,63992468,63998553,64001593,64093993,64105735,64116994,64118635,64120939,64121879,64124166,64128859,	Nrg1	2.38559	5.17e-08	3.00719	0.00586855	3.21705	0.055344	1	0	0	0	1	0	0	0	0	0
ctrlafb_g1_1.3.0_00024553	chr16	+	63955810	64124059	63955810	64124059	12	63955810,63983496,63992347,63998503,64001543,64093864,64105072,64116892,64118509,64120809,64121676,64124025,	63955832,63983673,63992468,63998553,64001593,64093993,64105139,64116994,64118635,64120939,64121879,64124059,	Nrg1	2.68326	4.88e-10	2.43779	0.0107122	2.01862	0.266576	1	0	0	0	1	0	0	0	0	0
ctrlafb_g1_1.3.0_00024564	chr16	+	80461767	80490072	80461767	80490072	4	80461767,80462335,80486285,80487866,	80461810,80462523,80486382,80490072,	LOC498662	2.25383	8.08e-05	-1.16814	0.655346	2.05899	1	1	0	0	0	1	0	0	0	0	0
ctrlafb_g1_1.3.0_00024671	chr17	+	6492142	6511270	6492142	6511270	5	6492142,6498652,6499864,6501101,6508766,	6492720,6498802,6499983,6501239,6511270,	Zfp367	2.09134	6.69e-05	1.79404	0.000796495	1.15569	1	1	0	0	0	1	0	0	0	0	0
ctrlafb_g1_1.3.0_00024672	chr17	+	6492858	6511270	6492858	6511270	5	6492858,6498652,6499864,6501101,6508766,	6492930,6498802,6499983,6501239,6511270,	Zfp367	2.1016	6.44e-05	1.79404	0.000600962	2.07091	1	1	0	0	0	1	0	0	0	0	0
ctrlafb_g1_1.3.0_00024701	chr17	+	11040339	11155923	11040339	11155923	27	11040339,11042148,11042957,11063087,11066263,11067960,11068928,11071126,11075833,11081440,11084797,11086412,11093881,11098047,11102136,11108180,11109492,11109660,11121593,11126563,11128203,11129250,11130198,11137788,11144186,11146430,11155249,	11040431,11042349,11043021,11063211,11066330,11068023,11069074,11071257,11075926,11081477,11085005,11086589,11093978,11098163,11102827,11108263,11109578,11109808,11121680,11126707,11128356,11129430,11130327,11137919,11144362,11146590,11155923,	Agtpbp1	2.37493	4.38e-08	1.14504	0.0430477	193.979	1	1	0	0	0	1	0	0	0	0	0
ctrlafb_g1_1.3.0_00024733	chr17	+	15346165	15349891	15346165	15349891	6	15346165,15346520,15347186,15347344,15349215,15349479,	15346307,15346625,15347215,15347458,15349398,15349891,	Mxd3	4.88282	0.000423494	1.63061	0.0579335	4.38388	0.0676405	1	0	0	0	1	0	0	0	0	0
ctrlafb_g1_1.3.0_00024826	chr17	+	37950875	37959283	37950875	37959283	7	37950875,37951907,37953574,37954704,37956393,37956733,37958776,	37950888,37952082,37953711,37954821,37956535,37956900,37959283,	Serpinb1a	3.11556	2.25e-07	1.98217	0.018467	3.07612	0.0152889	1	0	0	0	1	0	0	0	0	0
ctrlafb_g1_1.3.0_00024875	chr17	+	53135000	53160954	53135000	53160954	3	53135000,53158216,53159446,	53135486,53158424,53160954,	Epdr1	19.1415	0.000865613	1.2173	0.403495	4.66936	0.304661	1	0	0	0	1	0	0	0	0	0
ctrlafb_g1_1.3.0_00025137	chr17	-	26658743	26701537	26658743	26701537	5	26658743,26675508,26676338,26696773,26701268,	26663939,26675725,26678937,26696902,26701537,	Not RefSeq	-4.31587	6.59e-05	-4.68564	0.00163365	-1.74947	1	1	1	0	0	0	0	0	1	0	0
ctrlafb_g1_1.3.0_00025212	chr17	-	46899656	47090283	46899656	47090283	10	46899656,46908471,46935249,47014964,47026123,47028488,47033526,47033767,47085068,47089951,	46905080,46908773,46935349,47015123,47026177,47028634,47033657,47033843,47085122,47090283,	Dcdc2	3.55935	2.46e-11	2.26608	0.00664519	2.86896	0.0154091	1	0	0	0	1	0	0	0	0	0
ctrlafb_g1_1.3.0_00025246	chr17	-	57240193	57263237	57240193	57263237	5	57240193,57254406,57257480,57259572,57262990,	57245459,57254906,57257561,57261477,57263237,	Inhba	-2.01233	9.93e-06	-1.42093	0.062253	-3.80567	1	1	0	0	0	1	0	0	0	0	0
ctrlafb_g1_1.3.0_00025247	chr17	-	57240193	57263237	57240193	57263237	4	57240193,57254406,57259572,57261368,	57245459,57254906,57259757,57263237,	Inhba	-2.00044	1.4e-05	-1.42093	0.0599161	-2.58594	1	1	0	0	0	1	0	0	0	0	0
ctrlafb_g1_1.3.0_00025372	chr17	-	96721238	96757971	96721238	96757971	12	96721238,96724766,96725153,96738307,96739347,96742971,96745594,96746159,96750550,96751219,96753097,96757730,	96723101,96724867,96725266,96738445,96740456,96743143,96745741,96746265,96750638,96751358,96753234,96757971,	Mastl	3.33233	5.79e-10	4.54733	0.000795545	2.48714	0.0740305	1	1	0	0	0	0	0	1	0	0
ctrlafb_g1_1.3.0_00025389	chr17	+	11027748	11155923	11027748	11155923	28	11027748,11040340,11042148,11042957,11063087,11066263,11067960,11068928,11071126,11075833,11081440,11084797,11086412,11093881,11098047,11102136,11108180,11109492,11109660,11121593,11126563,11128203,11129250,11130198,11137788,11144186,11146430,11155249,	11027770,11040431,11042349,11043021,11063211,11066330,11068023,11069074,11071257,11075926,11081477,11085005,11086589,11093978,11098163,11102827,11108263,11109578,11109808,11121680,11126707,11128356,11129430,11130327,11137919,11144362,11146590,11155923,	Agtpbp1	2.37553	4.42e-08	1.14504	0.0443556	1.74545	0.150402	1	0	0	0	1	0	0	0	0	0
ctrlafb_g1_1.3.0_00025508	chr17	-	26661652	26677077	26661652	26677077	3	26661652,26675508,26676338,	26663939,26675745,26677077,	Not RefSeq	-4.57197	6.59e-05	-4.68564	0.000401445	-4.73794	1	1	1	0	0	0	0	0	1	0	0
ctrlafb_g1_1.3.0_00025531	chr17	-	57240187	57261702	57240187	57261702	4	57240187,57254406,57257480,57259572,	57245459,57254906,57257561,57261702,	Inhba	-2.01215	1.01e-05	-1.42093	0.0569287	0	1	1	0	0	0	1	0	0	0	0	0
ctrlafb_g1_1.3.0_00025863	chr17	-	26658743	26701537	26658743	26701537	5	26658743,26675508,26676338,26696773,26701268,	26663939,26675725,26676423,26696902,26701537,	Not RefSeq	-4.32819	1.99e-05	-4.68564	0.00157511	-10311.8	1	1	1	0	0	0	0	0	1	0	0
ctrlafb_g1_1.3.0_00025892	chr17	-	57240189	57258223	57240189	57258223	3	57240189,57254406,57257480,	57245459,57254906,57258223,	Inhba	-2.00335	1.64e-05	-1.42093	0.060778	-3.25341	1	1	0	0	0	1	0	0	0	0	0
ctrlafb_g1_1.3.0_00025931	chr17	+	11040339	11146586	11040339	11146586	25	11040339,11042148,11042957,11063087,11066263,11067960,11068928,11071126,11075833,11084797,11086412,11093881,11098047,11102136,11108180,11109492,11109660,11121593,11126563,11128203,11129250,11130198,11137788,11144186,11146430,	11040431,11042349,11043021,11063211,11066330,11068023,11069074,11071257,11075926,11085005,11086589,11093978,11098163,11102827,11108263,11109578,11109808,11121680,11126707,11128356,11129430,11130327,11137919,11144362,11146586,	Agtpbp1	2.47815	1.01e-07	1.0767	0.678879	0.129188	0.204107	1	0	0	0	1	0	0	0	0	0
ctrlafb_g1_1.3.0_00026050	chr17	-	46899656	46908860	46899656	46908860	2	46899656,46908471,	46905080,46908860,	Dcdc2	3.31087	2.15e-09	4.13969	0.00277118	0.0196319	0.276786	1	1	0	0	0	0	0	1	0	0
ctrlafb_g1_1.3.0_00026214	chr17	+	6501012	6511270	6501012	6511270	2	6501012,6508766,	6501239,6511270,	Zfp367	2.10169	9.8e-05	1.79404	0.000198728	0	1	1	0	0	0	1	0	0	0	0	0
ctrlafb_g1_1.3.0_00026313	chr17	-	46899656	47090283	46899656	47090283	10	46899656,46908471,46935249,47014964,47026123,47028488,47033526,47033767,47085068,47089943,	46905080,46908773,46935349,47015123,47026177,47028634,47033657,47033843,47085122,47090283,	Dcdc2	3.55935	2.46e-11	2.26608	0.00335637	113.52	0.44217	1	1	0	0	0	0	0	1	0	0
ctrlafb_g1_1.3.0_00026332	chr17	-	96722211	96753300	96722211	96753300	11	96722211,96724766,96725153,96738307,96739347,96742971,96745594,96746159,96750550,96751219,96753097,	96723101,96724867,96725266,96738445,96740456,96743143,96745741,96746265,96750638,96751358,96753300,	Mastl	3.54577	2.98e-09	6.03604	0.0031552	0.314449	0.0770296	1	1	0	0	0	0	0	1	0	0
ctrlafb_g1_1.3.0_00026713	chr18	+	63919776	63930050	63919776	63930050	4	63919776,63920340,63921932,63927973,	63919863,63920448,63922042,63930050,	Tubb6	3.22649	6.52e-05	1.39496	0.0545637	3.12374	0.000201972	1	0	1	0	0	0	0	0	1	0
ctrlafb_g1_1.3.0_00026725	chr18	+	66623573	66665814	66623573	66665814	9	66623573,66637034,66638298,66644268,66646780,66647343,66660026,66663255,66665299,	66623673,66637162,66638384,66644402,66646905,66647471,66660109,66663331,66665814,	Ccdc68	2.72218	0.000107109	1.86886	0.00463149	-0.0670277	0.322209	1	0	0	0	1	0	0	0	0	0
ctrlafb_g1_1.3.0_00026825	chr18	-	13167645	13282841	13167645	13282841	9	13167645,13172155,13175960,13176199,13184168,13192286,13250550,13279873,13282813,	13169888,13172312,13176118,13176389,13184246,13192375,13250671,13280868,13282841,	Klhl14	40.5532	5.7e-08	1.01737	0.181055	5.24436e-05	0.498768	1	0	0	0	1	0	0	0	0	0
ctrlafb_g1_1.3.0_00026904	chr18	-	31782746	31806888	31782746	31806888	4	31782746,31790837,31801713,31806513,	31786124,31790940,31801915,31806888,	Fgf1	2.28727	1.07e-07	2.44801	0.00298092	1.69062	1	1	1	0	0	0	0	0	1	0	0
ctrlafb_g1_1.3.0_00026905	chr18	-	31782736	31806466	31782736	31806466	4	31782736,31790837,31801713,31806220,	31786124,31790940,31801915,31806466,	Fgf1	2.35018	3.32e-08	2.44801	0.00241546	0.513374	1	1	1	0	0	0	0	0	1	0	0
ctrlafb_g1_1.3.0_00026939	chr18	-	48886548	48899154	48886548	48899154	5	48886548,48890921,48892757,48893416,48898957,	48887311,48891105,48892850,48893529,48899154,	Ppic	3.08254	2.84e-05	1.44169	0.00536779	2.98314	0.033949	1	0	0	0	1	0	0	0	0	0
ctrlafb_g1_1.3.0_00026998	chr18	-	64155604	64185478	64155604	64185478	12	64155604,64157893,64161578,64163454,64168459,64172065,64176008,64178815,64181181,64182061,64184008,64185165,	64157727,64158110,64161911,64163620,64168647,64172193,64176105,64179000,64181405,64182136,64184163,64185478,	Cep76	2.13702	6.71e-08	1.58592	0.00339525	2.2817	1	1	0	0	0	1	0	0	0	0	0
ctrlafb_g1_1.3.0_00027016	chr18	-	70988118	70998430	70988118	70998430	7	70988118,70989214,70991098,70993566,70995278,70997543,70998247,	70988746,70989383,70991235,70993663,70995402,70997638,70998430,	Ska1	3.45626	0.00437431	3.69634	0.00259429	-10620.2	0.995737	1	1	0	0	0	0	0	1	0	0
ctrlafb_g1_1.3.0_00027220	chr18	-	64156324	64185388	64156324	64185388	12	64156324,64157893,64161578,64163454,64168459,64172065,64176008,64178807,64181181,64182061,64184008,64185165,	64157727,64158110,64161911,64163620,64168647,64172193,64176105,64179000,64181405,64182136,64184163,64185388,	Cep76	2.16614	6.07e-08	1.02221	0.171388	1.38954	1	1	0	0	0	1	0	0	0	0	0
ctrlafb_g1_1.3.0_00027380	chr18	-	64155980	64176129	64155980	64176129	7	64155980,64157893,64161578,64163454,64168459,64172065,64176008,	64157727,64158110,64161911,64163620,64168647,64172193,64176129,	Cep76	2.14904	1.61e-07	2.45497	0.00204541	-0.0715091	1	1	1	0	0	0	0	0	1	0	0
ctrlafb_g1_1.3.0_00027577	chr18	+	66623573	66665814	66623573	66665814	11	66623573,66637034,66638298,66644268,66646780,66647343,66654622,66658574,66660026,66663255,66665299,	66623673,66637162,66638384,66644402,66646905,66647471,66654704,66658679,66660109,66663331,66665814,	Ccdc68	2.66576	5.58e-05	1.86886	0.00261991	3.11433	0.110806	1	0	0	0	1	0	0	0	0	0
ctrlafb_g1_1.3.0_00027634	chr18	-	64156162	64161944	64156162	64161944	3	64156162,64157893,64161578,	64157727,64158110,64161944,	Cep76	2.21835	1.88e-07	1.60973	0.00279274	2.34469	1	1	0	0	0	1	0	0	0	0	0
ctrlafb_g1_1.3.0_00027638	chr18	-	70988118	70998430	70988118	70998430	7	70988118,70989214,70991098,70993566,70995278,70997543,70998251,	70988746,70989383,70991235,70993663,70995402,70997638,70998430,	Ska1	3.39577	0.00378506	3.69634	0.00303091	81372.2	0.997972	1	1	0	0	0	0	0	1	0	0
ctrlafb_g1_1.3.0_00027653	chr18	+	4099188	4114915	4099188	4114915	6	4099188,4100249,4102581,4108310,4112218,4114773,	4099321,4100380,4102734,4108476,4112401,4114915,	Not RefSeq	2.74937	2.64e-06	1.32691	0.109551	3.1316	0.119316	1	0	0	0	1	0	0	0	0	0
ctrlafb_g1_1.3.0_00027684	chr18	+	66658485	66665814	66658485	66665814	4	66658485,66660026,66663255,66665299,	66658679,66660109,66663331,66665814,	Ccdc68	2.4537	0.00279871	1.86886	0.00218557	-1.05166	0.978496	1	0	0	0	1	0	0	0	0	0
ctrlafb_g1_1.3.0_00027701	chr18	-	13167645	13280905	13167645	13280905	8	13167645,13172155,13175960,13176199,13184168,13192286,13250550,13279873,	13169888,13172312,13176118,13176389,13184246,13192375,13250671,13280905,	Klhl14	40.5532	5.7e-08	1.01737	0.175852	0.373287	0.00548792	1	0	0	0	1	0	0	0	0	0
ctrlafb_g1_1.3.0_00027704	chr18	-	26270035	26352104	26270035	26352104	19	26270035,26271655,26271852,26275817,26276688,26284109,26297456,26298378,26300969,26301580,26305550,26326095,26331336,26332839,26346007,26346604,26348841,26350823,26352068,	26270563,26271736,26271962,26275885,26276735,26284228,26297533,26298425,26301082,26301663,26305640,26326216,26331413,26332930,26346070,26346692,26348928,26350943,26352104,	Epb41l4a	2.64091	0.000382435	2.5954	0.0195093	20930.5	1	1	0	0	0	1	0	0	0	0	0
ctrlafb_g1_1.3.0_00027712	chr18	-	31782729	31806760	31782729	31806760	4	31782729,31790837,31801713,31806513,	31786121,31790940,31801915,31806760,	Fgf1	2.29098	9.93e-08	2.44801	0.00337034	4.19231	1	1	1	0	0	0	0	0	1	0	0
ctrlafb_g1_1.3.0_00027725	chr18	-	64155604	64158178	64155604	64158178	2	64155604,64157893,	64157727,64158178,	Cep76	2.16566	5.99e-07	1.60973	0.00297501	1.62953	1	1	0	0	0	1	0	0	0	0	0
ctrlafb_g1_1.3.0_00027797	chr18	+	66635558	66665814	66635558	66665814	9	66635558,66637038,66638298,66644268,66646780,66647343,66660026,66663255,66665299,	66635732,66637162,66638384,66644402,66646905,66647471,66660109,66663331,66665814,	Ccdc68	2.74372	0.00011622	1.86886	0.00422365	2.61258	0.561913	1	0	0	0	1	0	0	0	0	0
ctrlafb_g1_1.3.0_00027817	chr18	-	26270035	26301728	26270035	26301728	10	26270035,26271655,26271852,26275817,26276688,26284109,26297456,26298378,26300969,26301580,	26270563,26271736,26271962,26275885,26276735,26284228,26297533,26298425,26301082,26301728,	Epb41l4a	2.94007	0.000516808	2.5954	0.0146881	3.77748	1	1	0	0	0	1	0	0	0	0	0
ctrlafb_g1_1.3.0_00027823	chr18	-	27167576	27196001	27167576	27196001	8	27167576,27168645,27169096,27169363,27173764,27182032,27188443,27195711,	27168455,27168733,27169230,27169466,27174076,27182124,27188730,27196001,	Gfra3	2.01911	0.000478828	1.14878	0.24463	3.82594	1	1	0	0	0	1	0	0	0	0	0
ctrlafb_g1_1.3.0_00027873	chr18	+	28984387	29031386	28984387	29031386	3	28984387,29002037,29031258,	28984462,29002254,29031386,	Not RefSeq	2.18121	0.000550031	1.21616	0.0093291	2.80703	0.19707	1	0	0	0	1	0	0	0	0	0
ctrlafb_g1_1.3.0_00027894	chr18	+	49023904	49045843	49023904	49045843	3	49023904,49035736,49045762,	49024015,49036081,49045843,	Not RefSeq	4.43474	0.00311008	1.01328	0.89996	3.44498	0.222684	1	0	0	0	1	0	0	0	0	0
ctrlafb_g1_1.3.0_00027913	chr18	-	13175882	13282841	13175882	13282841	7	13175882,13176199,13184168,13192286,13250550,13279873,13282813,	13176118,13176389,13184246,13192375,13250671,13280868,13282841,	Klhl14	14.2741	1.48e-07	1.01737	0.176516	0.0457691	0.328627	1	0	0	0	1	0	0	0	0	0
ctrlafb_g1_1.3.0_00027917	chr18	-	26270035	26350940	26270035	26350940	18	26270035,26271655,26271852,26275817,26276688,26284109,26297456,26298378,26300965,26301580,26305550,26326095,26331336,26332839,26346007,26346604,26348841,26350823,	26270563,26271736,26271962,26275885,26276735,26284228,26297533,26298421,26301082,26301663,26305640,26326216,26331413,26332930,26346070,26346692,26348928,26350940,	Epb41l4a	2.63412	0.000432815	2.5954	0.0193089	1.38381	1	1	0	0	0	1	0	0	0	0	0
ctrlafb_g1_1.3.0_00027941	chr18	-	64156186	64181452	64156186	64181452	9	64156186,64157893,64161578,64163454,64168459,64172065,64176008,64178815,64181181,	64157727,64158110,64161911,64163620,64168647,64172193,64176105,64179000,64181452,	Cep76	2.13432	1.38e-07	2.45497	0.004004	3.33175	1	1	1	0	0	0	0	0	1	0	0
ctrlafb_g1_1.3.0_00028007	chr19	+	13978914	14001062	13978914	14001062	17	13978914,13979051,13979418,13979630,13983765,13985356,13986974,13990740,13992120,13992555,13992884,13994418,13995533,13997453,13998868,13999786,14000347,	13978937,13979225,13979544,13979758,13983937,13985511,13987140,13990851,13992263,13992620,13993060,13994530,13995661,13997595,13998995,13999971,14001062,	Mcm5	2.7234	2.04e-08	1.72345	0.146482	2.66527	0.0191599	1	0	0	0	1	0	0	0	0	0
ctrlafb_g1_1.3.0_00028008	chr19	+	13978940	14000641	13978940	14000641	16	13978940,13979418,13979630,13983765,13985356,13986974,13990740,13992120,13992555,13992884,13994418,13995533,13997453,13998868,13999786,14000347,	13979225,13979544,13979758,13983937,13985511,13987140,13990851,13992263,13992620,13993060,13994530,13995661,13997595,13998995,13999971,14000641,	Mcm5	2.88843	2.4e-08	1.72345	0.134364	0.023758	0.345232	1	0	0	0	1	0	0	0	0	0
ctrlafb_g1_1.3.0_00028021	chr19	+	14981458	15021207	14981458	15021207	10	14981458,14981886,14985208,14986804,14988117,14990688,14991880,15012857,15020513,15020869,	14981590,14982096,14985352,14986937,14988270,14990792,14991985,15012990,15020585,15021207,	Ces1c	2.03525	2.9e-08	1.59307	0.00289316	2.01703	1	1	0	0	0	1	0	0	0	0	0
ctrlafb_g1_1.3.0_00028022	chr19	+	14981499	15021202	14981499	15021202	10	14981499,14981892,14985208,14986804,14988117,14990688,14991880,15012857,15020513,15020869,	14981590,14982096,14985352,14986937,14988270,14990792,14991985,15012990,15020585,15021202,	Ces1c	2.03583	3e-08	1.59307	0.00276789	1.90555	1	1	0	0	0	1	0	0	0	0	0
ctrlafb_g1_1.3.0_00028029	chr19	+	17945550	17975738	17945550	17975738	6	17945550,17949740,17963984,17968197,17970065,17973734,	17945614,17949991,17964253,17968424,17970145,17975738,	Tox3	2.29252	2.91e-05	2.14346	0.0013922	71407.9	1	1	1	0	0	0	0	0	1	0	0
ctrlafb_g1_1.3.0_00028117	chr19	+	32158279	32175396	32158279	32175396	10	32158279,32161546,32161764,32163360,32165036,32166257,32170928,32172006,32172636,32173254,	32158939,32161676,32161800,32163565,32165110,32166350,32171040,32172105,32172807,32175396,	Tmem184c	2.61742	2.7e-12	1.55535	0.00040008	0	1	1	0	0	0	1	0	0	0	0	0
ctrlafb_g1_1.3.0_00028118	chr19	+	32172260	32175403	32172260	32175403	2	32172260,32173254,	32172807,32175403,	Tmem184c	2.42629	2.2e-09	1.55535	0.000805802	1.20803	1	1	0	0	0	1	0	0	0	0	0
ctrlafb_g1_1.3.0_00028132	chr19	+	35094345	35096012	35094345	35096012	2	35094345,35094860,	35094724,35096012,	Nol3	3.9763	1.3e-06	2.9907	0.00717703	-0.000509363	0.495997	1	0	0	0	1	0	0	0	0	0
ctrlafb_g1_1.3.0_00028228	chr19	+	48507173	49575122	48507173	49575122	14	48507173,48730589,48917388,49083011,49171020,49299311,49421260,49446668,49488937,49495767,49542261,49563985,49566240,49573950,	48507287,48730700,48917596,49083127,49171172,49299455,49421438,49446808,49489119,49496020,49542403,49564218,49566461,49575122,	Cdh13	78.8201	2.03e-83	70.3641	0.000201735	7.82602	0.000101237	1	1	1	1	0	0	0	0	0	0
ctrlafb_g1_1.3.0_00028234	chr19	+	49821884	49842234	49821884	49842234	12	49821884,49824821,49826929,49829700,49830018,49833295,49835603,49836565,49838992,49840114,49841161,49841926,	49822052,49824956,49827020,49829921,49830184,49833416,49835760,49836822,49839083,49840173,49841554,49842234,	Dnaaf1	204.159	5.79e-07	3.21085	0.0131579	0.0561133	1	1	0	0	0	1	0	0	0	0	0
ctrlafb_g1_1.3.0_00028272	chr19	+	53503413	53519562	53503413	53519562	11	53503413,53511378,53515971,53516308,53516545,53516871,53517207,53517466,53517626,53517884,53518100,	53503562,53511536,53516103,53516440,53516695,53516940,53517383,53517550,53517701,53518019,53519562,	Dpep1	2.18424	0.000137123	1.11389	0.777248	2.1423	0.0868496	1	0	0	0	1	0	0	0	0	0
ctrlafb_g1_1.3.0_00028336	chr19	-	10666940	10676424	10666940	10676424	3	10666940,10671284,10676335,	10669785,10671404,10676424,	Cx3cl1	2.88312	2.6e-05	1.61176	0.0356428	2.79867	0.0540761	1	0	0	0	1	0	0	0	0	0
ctrlafb_g1_1.3.0_00028363	chr19	-	15246036	15275061	15246036	15275061	13	15246036,15249289,15253204,15255063,15258624,15259751,15261970,15262903,15265969,15266337,15267351,15271122,15274618,	15246899,15249398,15253363,15255199,15258765,15259906,15262143,15263076,15266142,15266465,15267501,15271246,15275061,	Mmp2	2.00207	1.29e-05	1.62326	0.0139535	2.17885	0.032344	1	0	0	0	1	0	0	0	0	0
ctrlafb_g1_1.3.0_00028432	chr19	-	25867384	25881909	25867384	25881909	4	25867384,25869248,25871937,25881637,	25868403,25869424,25872052,25881909,	Asf1b	3.02665	3.85e-06	1.23743	0.254781	2.86353	0.0401168	1	0	0	0	1	0	0	0	0	0
ctrlafb_g1_1.3.0_00028491	chr19	-	35680014	35686455	35680014	35686455	13	35680014,35680313,35680499,35681360,35681803,35682126,35683537,35683799,35683968,35684206,35684406,35684629,35686336,	35680234,35680417,35680666,35681453,35681955,35682326,35683685,35683835,35684104,35684302,35684493,35684719,35686455,	Cenpt	2.54767	0.000796766	2.30775	0.0170974	2.12554	0.220887	1	0	0	0	1	0	0	0	0	0
ctrlafb_g1_1.3.0_00028510	chr19	-	37251147	37266040	37251147	37266040	6	37251147,37254528,37256249,37256772,37256973,37265945,	37251994,37254629,37256362,37256902,37257137,37266040,	Nqo1	6.52416	2.45e-08	5.94882	0.000199521	6.25112	3.91728e-10	1	1	1	1	0	0	0	0	0	0
ctrlafb_g1_1.3.0_00028696	chr19	+	32158361	32174009	32158361	32174009	10	32158361,32161546,32161764,32163360,32165036,32166257,32170928,32172014,32172636,32173254,	32158939,32161676,32161800,32163565,32165110,32166350,32171044,32172105,32172807,32174009,	Tmem184c	2.76361	6.74e-12	1.55535	0.000203791	7.81599	1	1	0	0	0	1	0	0	0	0	0
ctrlafb_g1_1.3.0_00028892	chr19	+	32171967	32175360	32171967	32175360	3	32171967,32172636,32173254,	32172105,32172807,32175360,	Tmem184c	2.37354	4.12e-09	1.55535	0.000402658	1.09764	1	1	0	0	0	1	0	0	0	0	0
ctrlafb_g1_1.3.0_00029068	chr19	+	17866409	17975738	17866409	17975738	7	17866409,17945552,17949740,17963984,17968197,17970065,17973734,	17866466,17945614,17949991,17964253,17968424,17970145,17975738,	Tox3	2.27218	2.97e-05	2.14346	0.00216877	-0.614143	1	1	1	0	0	0	0	0	1	0	0
ctrlafb_g1_1.3.0_00029084	chr19	+	32158361	32175360	32158361	32175360	9	32158361,32161546,32161764,32163360,32165036,32166257,32170928,32172006,32172636,	32158939,32161676,32161800,32163565,32165110,32166350,32171040,32172105,32175360,	Tmem184c	2.52283	1.35e-11	1.55535	0.000809061	-1.81089	1	1	0	0	0	1	0	0	0	0	0
ctrlafb_g1_1.3.0_00029144	chr19	-	10877162	10885591	10877162	10885591	4	10877162,10878910,10884475,10885544,	10877796,10879146,10884608,10885591,	Not RefSeq	4.00599	7.18e-09	-1.02833	0.0586836	1.39058	0.587742	1	0	0	0	1	0	0	0	0	0
ctrlafb_g1_1.3.0_00029153	chr19	-	15246035	15255264	15246035	15255264	4	15246035,15249289,15253204,15255063,	15246899,15249398,15253363,15255264,	Mmp2	2.02175	0.000101539	1.62326	0.0136766	1.76691	0.350217	1	0	0	0	1	0	0	0	0	0
ctrlafb_g1_1.3.0_00029241	chr19	+	15012663	15021207	15012663	15021207	4	15012663,15012859,15020513,15020869,	15012765,15012990,15020585,15021207,	Ces1c	2.24394	6.22e-09	1.59307	0.00160256	2.9116	1	1	0	0	0	1	0	0	0	0	0
ctrlafb_g1_1.3.0_00029257	chr19	+	32164676	32175409	32164676	32175409	7	32164676,32165036,32166257,32170928,32172006,32172636,32173254,	32164703,32165110,32166350,32171040,32172105,32172807,32175409,	Tmem184c	2.37407	1.88e-09	1.55535	0.000401043	3.12346	1	1	0	0	0	1	0	0	0	0	0
ctrlafb_g1_1.3.0_00029287	chr19	+	49218299	49575078	49218299	49575078	10	49218299,49299311,49421260,49446668,49488937,49495767,49542261,49563985,49566240,49573950,	49218498,49299455,49421438,49446808,49489119,49496020,49542403,49564218,49566461,49575078,	Cdh13	99.1331	1.27e-87	70.3641	0.000199402	22.2776	2.48926e-10	1	1	1	1	0	0	0	0	0	0
ctrlafb_g1_1.3.0_00029288	chr19	+	49829671	49842811	49829671	49842811	8	49829671,49833295,49835603,49836565,49838992,49840114,49841161,49841926,	49830184,49833416,49835760,49836822,49839083,49840173,49841554,49842811,	Dnaaf1	9.37729	0.00429126	2.80614	0.0134755	1.35836	1	1	0	0	0	1	0	0	0	0	0
ctrlafb_g1_1.3.0_00029323	chr19	-	10877162	10879328	10877162	10879328	3	10877162,10878910,10879236,	10877796,10879146,10879328,	Not RefSeq	5.05792	2.57e-10	-1.02833	0.0570588	3.00434	0.00580922	1	0	0	0	1	0	0	0	0	0
ctrlafb_g1_1.3.0_00029426	chr19	+	35091876	35096012	35091876	35096012	3	35091876,35094425,35094860,	35092036,35094724,35096012,	Nol3	4.73279	2.62e-08	2.9907	0.00620124	10.5464	0.0439438	1	0	0	0	1	0	0	0	0	0
ctrlafb_g1_1.3.0_00029427	chr19	+	35094206	35096012	35094206	35096012	3	35094206,35094860,35095316,	35094724,35095213,35096012,	Nol3	3.83102	2.43e-06	2.9907	0.00852498	2.13566	0.48012	1	0	0	0	1	0	0	0	0	0
ctrlafb_g1_1.3.0_00029582	chr19	+	49829667	49842234	49829667	49842234	9	49829667,49830018,49833295,49835603,49836565,49838992,49840114,49841161,49841926,	49829921,49830184,49833416,49835760,49836822,49839083,49840173,49841554,49842234,	Dnaaf1	216.827	5.95e-07	3.21085	0.0164034	3.48221	1	1	0	0	0	1	0	0	0	0	0
ctrlafb_g1_1.3.0_00029694	chr19	+	35094175	35096012	35094175	35096012	3	35094175,35094425,35094860,	35094263,35094724,35096012,	Nol3	4.01897	1.01e-06	2.9907	0.00926108	0.081666	0.270702	1	0	0	0	1	0	0	0	0	0
ctrlafb_g1_1.3.0_00029860	chr2	+	39568590	39597782	39568590	39597782	7	39568590,39578309,39582623,39583999,39586446,39591698,39595564,	39568653,39578499,39582703,39584055,39586551,39591834,39597782,	Elovl7	8.13454	4.1e-10	1.54337	0.152962	2.79691	0.434352	1	0	0	0	1	0	0	0	0	0
ctrlafb_g1_1.3.0_00029861	chr2	+	39632210	39700199	39632210	39700199	11	39632210,39639082,39666946,39671068,39672227,39674946,39679720,39692828,39695144,39697428,39699215,	39632339,39639347,39667081,39671195,39672357,39674993,39679860,39692994,39695320,39697613,39700199,	Depdc1b	4.19758	0.00309013	2.02813	0.00594766	3.94974	0.0847434	1	0	0	0	1	0	0	0	0	0
ctrlafb_g1_1.3.0_00029900	chr2	+	53685743	53764822	53685743	53764822	18	53685743,53691251,53692968,53694366,53698975,53708658,53722849,53727173,53731660,53739390,53740837,53742624,53743108,53746617,53748261,53755464,53757899,53764159,	53685891,53691434,53693124,53694510,53699116,53708796,53723049,53727413,53731782,53739556,53741062,53742795,53743219,53746749,53748449,53755554,53758137,53764822,	C6	-2.292	5.32e-09	-1.96431	0.00060024	-1.6796	0.0519324	1	0	0	0	1	0	0	0	0	0
ctrlafb_g1_1.3.0_00029901	chr2	+	53691290	53764539	53691290	53764539	17	53691290,53692968,53694366,53698975,53708658,53722849,53727173,53731660,53739390,53740837,53742624,53743108,53746617,53748261,53755464,53757896,53764159,	53691434,53693124,53694510,53699116,53708796,53723049,53727413,53731782,53739556,53741062,53742795,53743219,53746749,53748449,53755554,53758137,53764539,	C6	-2.24574	1.83e-08	-1.96431	0.000793808	-2.11781	0.00030763	1	0	1	0	0	0	0	0	1	0
ctrlafb_g1_1.3.0_00029965	chr2	+	84725092	85158599	84725092	85158599	23	84725092,84828647,84890175,84928795,84944007,85002009,85011851,85013418,85025558,85031303,85035392,85070720,85080247,85090611,85093629,85103330,85131646,85135463,85141882,85144189,85145128,85149181,85151870,	84725580,84828749,84890372,84928894,84944052,85002071,85011949,85013631,85025843,85031438,85035596,85070927,85080364,85090792,85093772,85103477,85131871,85135681,85142052,85144344,85145175,85149392,85158599,	Sema5a	2.38031	7.9e-06	1.24852	0.066074	2.47626	0.0307369	1	0	0	0	1	0	0	0	0	0
ctrlafb_g1_1.3.0_00029985	chr2	+	93536133	93540734	93536133	93540734	4	93536133,93538579,93539343,93540537,	93536223,93538751,93539444,93540734,	Fabp4	6.18027	1.25e-21	8.29502	0.00340681	5.34102	0.000497531	1	1	1	1	0	0	0	0	0	0
ctrlafb_g1_1.3.0_00030028	chr2	+	117217836	117219796	117217836	117219796	2	117217836,117218881,	117218035,117219796,	Arpm1	7.94361	0.000107262	5.63438	0.0619257	4.89967	0.115164	1	0	0	0	1	0	0	0	0	0
ctrlafb_g1_1.3.0_00030069	chr2	+	127760508	127779640	127760508	127779640	15	127760508,127761472,127762423,127765660,127767556,127769508,127772101,127772498,127773359,127774025,127774241,127774943,127776092,127777761,127779079,	127760767,127761516,127762519,127766578,127767656,127769860,127772205,127772600,127773508,127774158,127774332,127775087,127776217,127777867,127779640,	Plk4	2.16773	0.00249876	1.00357	0.971537	0	1	1	0	0	0	1	0	0	0	0	0
ctrlafb_g1_1.3.0_00030106	chr2	+	144678212	144756698	144678212	144756698	13	144678212,144679266,144693183,144695765,144702473,144702954,144704879,144715961,144717938,144718370,144721934,144734668,144751080,	144678376,144679360,144693267,144695873,144702530,144703073,144705025,144716094,144718015,144718466,144722014,144734781,144756698,	Dclk1	2.74829	0.000112096	1.12703	0.292028	-12.4805	0.646109	1	0	0	0	1	0	0	0	0	0
ctrlafb_g1_1.3.0_00030107	chr2	+	144715892	144756698	144715892	144756698	6	144715892,144717938,144718370,144721934,144734668,144751080,	144716094,144718015,144718466,144722014,144734781,144756698,	Dclk1	2.61447	0.000373326	1.12703	0.295228	-0.0856028	0.0551957	1	0	0	0	1	0	0	0	0	0
ctrlafb_g1_1.3.0_00030159	chr2	+	172635431	172812518	172635431	172812518	6	172635431,172729221,172768537,172802858,172807464,172810810,	172635849,172729416,172768717,172803065,172807681,172812518,	Pdgfc	2.32715	3.43e-10	3.12803	0.000395179	2.2935	1	1	1	0	0	0	0	0	1	0	0
ctrlafb_g1_1.3.0_00030160	chr2	+	172719632	172812389	172719632	172812389	6	172719632,172729221,172768537,172802858,172807464,172810810,	172719692,172729416,172768717,172803065,172807681,172812389,	Pdgfc	2.32473	1.98e-09	3.12803	0.000199283	2.51398	1	1	1	0	0	0	0	0	1	0	0
ctrlafb_g1_1.3.0_00030199	chr2	+	180155679	180198814	180155679	180198814	38	180155679,180157442,180160125,180161000,180164558,180165443,180165598,180165890,180166466,180167214,180168424,180172208,180173999,180175489,180175886,180177638,180178711,180178964,180179184,180181478,180181706,180181870,180184465,180185323,180185813,180186251,180187648,180189851,180190136,180190644,180190893,180191491,180192466,180193255,180194069,180194490,180194982,180197805,	180155715,180157529,180160281,180161077,180164634,180165510,180165711,180166068,180166544,180167377,180168511,180172371,180174156,180175610,180176049,180177728,180178878,180179103,180179354,180181561,180181777,180181939,180184673,180185475,180185976,180186475,180187788,180189935,180190368,180190776,180190995,180191617,180192553,180193467,180194235,180194591,180195090,180198814,	Iqgap3	3.1901	1.69e-10	1.30366	0.0106963	15.808	0.0719923	1	0	0	0	1	0	0	0	0	0
ctrlafb_g1_1.3.0_00030200	chr2	+	180185261	180198814	180185261	180198814	15	180185261,180185858,180186251,180187648,180189851,180190136,180190644,180190893,180191491,180192466,180193255,180194069,180194490,180194982,180197805,	180185475,180185976,180186475,180187788,180189935,180190368,180190776,180190995,180191617,180192553,180193467,180194235,180194591,180195090,180198814,	Iqgap3	3.01474	7.93e-08	1.30366	0.00871504	-0.0511836	0.230296	1	0	0	0	1	0	0	0	0	0
ctrlafb_g1_1.3.0_00030201	chr2	+	180192328	180198814	180192328	180198814	6	180192328,180193255,180194069,180194490,180194982,180197805,	180192553,180193467,180194235,180194591,180195090,180198814,	Iqgap3	2.93484	4.09e-06	1.30366	0.0086	2.07334	0.409278	1	0	0	0	1	0	0	0	0	0
ctrlafb_g1_1.3.0_00030237	chr2	+	181399482	181403640	181399482	181403640	7	181399482,181400893,181401261,181401455,181401699,181401897,181403286,	181400546,181401161,181401313,181401588,181401820,181402046,181403640,	Muc1	3.07053	6.26e-06	1.88124	0.000796972	2.94993	0.0290556	1	0	0	0	1	0	0	0	0	0
ctrlafb_g1_1.3.0_00030403	chr2	+	200039684	200044698	200039684	200044698	10	200039684,200041170,200041704,200042223,200042619,200043364,200043660,200043884,200044104,200044381,	200040010,200041284,200041988,200042335,200042703,200043482,200043723,200043991,200044255,200044698,	Ppm1j	23.4695	7.01e-09	14.4634	0.000406752	10.7678	0.0288978	1	1	0	0	0	0	0	1	0	0
ctrlafb_g1_1.3.0_00030405	chr2	+	200048056	200054107	200048056	200054107	5	200048056,200051415,200052046,200052413,200053513,	200048311,200051578,200052166,200052543,200054107,	Rhoc	2.31646	5.14e-11	2.27742	0.00119095	2.68823	1	1	1	0	0	0	0	0	1	0	0
ctrlafb_g1_1.3.0_00030432	chr2	+	203853009	203931559	203853009	203931559	20	203853009,203877654,203879351,203892628,203893657,203895798,203898896,203902464,203905638,203906453,203910032,203914651,203915470,203916396,203918313,203921235,203923909,203926333,203926678,203927356,	203853331,203877713,203879424,203892730,203893821,203895871,203898945,203902594,203905782,203906608,203910138,203914753,203915638,203916586,203918502,203921351,203924017,203926439,203926789,203931559,	Sort1	3.04825	2.46e-18	3.29784	0.00118507	3.05401	1	1	1	0	0	0	0	0	1	0	0
ctrlafb_g1_1.3.0_00030433	chr2	+	203853009	203931559	203853009	203931559	20	203853009,203877654,203879351,203892628,203893657,203895798,203898896,203902467,203905638,203906453,203910032,203914651,203915470,203916396,203918313,203921235,203923909,203926333,203926678,203927356,	203853331,203877713,203879424,203892730,203893821,203895871,203898945,203902594,203905782,203906608,203910138,203914753,203915638,203916586,203918502,203921351,203924017,203926439,203926789,203931559,	Sort1	3.05478	1.91e-18	3.29784	0.00100422	3.58783	1	1	1	0	0	0	0	0	1	0	0
ctrlafb_g1_1.3.0_00030474	chr2	+	218895373	218918627	218895373	218918627	7	218895373,218905326,218909138,218910880,218911470,218913501,218914781,	218895681,218905391,218909222,218910939,218911672,218913615,218918627,	Gclm	2.05931	3.73e-07	1.02444	0.773055	2.13617	0.000244982	1	0	1	0	0	0	0	0	1	0
ctrlafb_g1_1.3.0_00030497	chr2	+	227331049	227348091	227331049	227348091	3	227331049,227341322,227347104,	227331349,227341398,227348091,	Pla2g12a	2.19962	0.00146806	1.14186	0.168145	2.01984	1	1	0	0	0	1	0	0	0	0	0
ctrlafb_g1_1.3.0_00030513	chr2	+	232765049	232785694	232765049	232785694	10	232765049,232769384,232771194,232772446,232773832,232778343,232779518,232781926,232782733,232785444,	232765190,232769534,232771272,232772542,232773940,232778403,232779631,232781984,232782825,232785694,	Bdh2	2.24491	0.000485609	1.24018	0.325197	0	1	1	0	0	0	1	0	0	0	0	0
ctrlafb_g1_1.3.0_00030514	chr2	+	232765049	232785694	232765049	232785694	10	232765049,232769455,232771194,232772446,232773832,232778343,232779518,232781926,232782733,232785444,	232765190,232769534,232771272,232772542,232773940,232778403,232779631,232781984,232782825,232785694,	Bdh2	2.2933	0.00023536	1.24018	0.331998	2.53243	0.0156992	1	0	0	0	1	0	0	0	0	0
ctrlafb_g1_1.3.0_00030526	chr2	+	235130756	235133412	235130756	235133412	3	235130756,235131042,235132861,	235130786,235131183,235133412,	Ddit4l	106.715	4.73e-08	147.817	0.000400882	4.51893	0.0104395	1	1	0	0	0	0	0	1	0	0
ctrlafb_g1_1.3.0_00030555	chr2	+	240507203	240509378	240507203	240509378	2	240507203,240508651,	240507309,240509378,	Not RefSeq	2.30797	0.000832529	2.34712	0.0137532	3.0029	0.249264	1	0	0	0	1	0	0	0	0	0
ctrlafb_g1_1.3.0_00030636	chr2	-	21004515	21032007	21004515	21032007	7	21004515,21007783,21011376,21025032,21025847,21026189,21031883,	21004926,21008023,21011426,21025249,21025908,21026229,21032007,	Atp6ap1l	2.36645	0.000267575	-1.13696	0.595286	-2.29871	0.739557	1	0	0	0	1	0	0	0	0	0
ctrlafb_g1_1.3.0_00030691	chr2	-	30415235	30508354	30415235	30508354	7	30415235,30421001,30422972,30437322,30439937,30499584,30508007,	30419706,30421239,30429452,30437462,30440019,30499685,30508354,	Map1b	2.56874	0.00114699	1.07524	0.221479	2.07276	1	1	0	0	0	1	0	0	0	0	0
ctrlafb_g1_1.3.0_00030832	chr2	-	88077097	88092223	88077097	88092223	7	88077097,88080902,88082545,88083751,88084264,88090925,88092182,	88077882,88081057,88082607,88083843,88084382,88091122,88092223,	Car2	6.91979	4.54e-06	2.66728	0.00497314	9.68773	5.93667e-11	1	1	1	1	0	0	0	0	0	0
ctrlafb_g1_1.3.0_00030835	chr2	-	88382409	88396450	88382409	88396450	10	88382409,88385574,88386281,88386514,88387528,88388535,88389576,88392130,88395072,88396133,	88382936,88385711,88386418,88386722,88387693,88388707,88389761,88392331,88395211,88396450,	Lrrcc1	2.54539	0.000205044	1.88596	0.00260887	3.30351	1	1	0	0	0	1	0	0	0	0	0
ctrlafb_g1_1.3.0_00030836	chr2	-	88382755	88589737	88382755	88589737	19	88382755,88385574,88386281,88386514,88387528,88388535,88389576,88392130,88395072,88396133,88400312,88401153,88402830,88404174,88404473,88406990,88407823,88408151,88589594,	88382936,88385711,88386418,88386722,88387693,88388707,88389761,88392331,88395211,88396337,88400460,88401300,88403026,88404374,88404648,88407157,88407888,88408356,88589737,	Lrrcc1	2.62843	9.91e-05	1.88596	0.00378561	0	1	1	0	0	0	1	0	0	0	0	0
ctrlafb_g1_1.3.0_00030847	chr2	-	96522045	96597367	96522045	96597367	4	96522045,96529100,96555310,96597256,	96525372,96529277,96555423,96597367,	Pkia	3.9974	2.29e-19	3.96804	0.00139693	8.97584	1	1	1	0	0	0	0	0	1	0	0
ctrlafb_g1_1.3.0_00030848	chr2	-	96522040	96597367	96522040	96597367	5	96522040,96529100,96548115,96555310,96597256,	96525372,96529277,96548237,96555423,96597367,	Pkia	3.95127	7.46e-19	3.96804	0.00138449	2.45569	1	1	1	0	0	0	0	0	1	0	0
ctrlafb_g1_1.3.0_00030899	chr2	-	123062150	123069085	123062150	123069085	8	123062150,123063432,123063883,123064588,123065397,123065803,123067921,123068814,	123063154,123063565,123063996,123064795,123065620,123065915,123068164,123069085,	Ccna2	2.0704	0.00109571	3.25085	0.0150301	5.5601	1	1	0	0	0	1	0	0	0	0	0
ctrlafb_g1_1.3.0_00030920	chr2	-	139241142	139317101	139241142	139317101	12	139241142,139254184,139255662,139257607,139258499,139260374,139290835,139296784,139301262,139309274,139312562,139316695,	139248461,139254361,139255811,139257703,139258602,139260497,139290879,139296883,139301387,139309389,139312688,139317101,	Slc7a11	54.8804	9.49e-21	1.0908	0.629058	59.4151	1.44203e-10	1	0	1	0	0	0	0	0	1	0
ctrlafb_g1_1.3.0_00030997	chr2	-	172265159	172385285	172265159	172385285	16	172265159,172269207,172271283,172272246,172283579,172288169,172288991,172290654,172291523,172292034,172304701,172309388,172319220,172329232,172384111,172384767,	172268814,172269455,172271397,172272493,172283777,172288539,172289197,172290764,172291627,172292201,172304862,172309441,172319416,172329471,172384251,172385285,	Gria2	-16.926	1.05e-07	1.00393	0.901569	-0.0886251	0.0152934	1	0	0	0	1	0	0	0	0	0
ctrlafb_g1_1.3.0_00030998	chr2	-	172265159	172385285	172265159	172385285	16	172265159,172269207,172270507,172272246,172283579,172288169,172288991,172290654,172291523,172292034,172304701,172309388,172319220,172329232,172384111,172384767,	172268814,172269455,172270621,172272493,172283777,172288539,172289197,172290764,172291627,172292201,172304862,172309441,172319416,172329471,172384251,172385285,	Gria2	-16.4427	7.14e-08	1.00393	0.901949	-2.84925e-06	0.499879	1	0	0	0	1	0	0	0	0	0
ctrlafb_g1_1.3.0_00031043	chr2	-	180320787	180333050	180320787	180333050	10	180320787,180321274,180322353,180322926,180323191,180323575,180325285,180325538,180326150,180332843,	180321124,180321347,180322474,180323059,180323328,180323741,180325432,180325688,180326336,180333050,	Rhbg	7.52989	8.8e-19	4.23562	0.000590203	6.85574	2.66997e-05	1	1	1	1	0	0	0	0	0	0
ctrlafb_g1_1.3.0_00031054	chr2	-	180657125	180663222	180657125	180663222	5	180657125,180657789,180658396,180660268,180662953,	180657465,180657869,180658589,180660463,180663222,	Rab25	4.82766	0.000498126	2.83786	0.0146074	4.49548	0.0474921	1	0	0	0	1	0	0	0	0	0
ctrlafb_g1_1.3.0_00031184	chr2	-	193147943	193177137	193147943	193177137	13	193147943,193148903,193150027,193151081,193153755,193154818,193155403,193166042,193166239,193169036,193170492,193176685,193177097,	193148189,193149140,193150157,193151213,193153907,193154966,193155535,193166140,193166293,193169101,193170643,193176890,193177137,	Phgdh	9.26615	3.69e-15	5.91256	0.00221194	-0.29503	0.0190112	1	1	0	0	0	0	0	1	0	0
ctrlafb_g1_1.3.0_00031253	chr2	-	203575444	203580821	203575444	203580821	8	203575444,203577954,203578147,203579411,203579601,203579929,203580379,203580749,	203575895,203578064,203578242,203579511,203579682,203579993,203580454,203580821,	Gstm1	2.89511	8.98e-09	2.81645	0.000989707	3.16876	1	1	1	0	0	0	0	0	1	0	0
ctrlafb_g1_1.3.0_00031417	chr2	-	250634141	250647986	250634141	250647986	3	250634141,250642378,250647879,	250634585,250642459,250647986,	Gipc2	7.91556	3.2e-05	-1.05746	0.0981583	5.97221	0.0353512	1	0	0	0	1	0	0	0	0	0
ctrlafb_g1_1.3.0_00031449	chr2	+	27729976	27733251	27729976	27733251	2	27729976,27731850,	27730720,27733251,	Enc1	2.28534	0.00435864	1.54498	0.119679	2.16721	1	1	0	0	0	1	0	0	0	0	0
ctrlafb_g1_1.3.0_00031483	chr2	+	57403734	57426673	57403734	57426673	2	57403734,57423531,	57403975,57426673,	Gdnf	-2.00115	1.73e-05	-2.10489	0.00865714	-1.17933	1	1	0	0	0	1	0	0	0	0	0
ctrlafb_g1_1.3.0_00031701	chr2	-	30415235	30429580	30415235	30429580	3	30415235,30421001,30422972,	30419706,30421239,30429580,	Map1b	2.57807	0.000971045	1.01905	0.246333	3.91424	1	1	0	0	0	1	0	0	0	0	0
ctrlafb_g1_1.3.0_00031803	chr2	-	159016206	159027961	159016206	159027961	3	159016206,159027009,159027881,	159018850,159027083,159027961,	Trim59	2.32929	3.5e-05	1.07935	0.734937	2.35248	0.0498765	1	0	0	0	1	0	0	0	0	0
ctrlafb_g1_1.3.0_00031973	chr2	+	53703216	53764528	53703216	53764528	14	53703216,53708658,53722849,53727173,53731660,53739390,53740837,53742624,53743108,53746617,53748261,53755464,53757896,53764159,	53703257,53708796,53723049,53727413,53731782,53739556,53741062,53742795,53743219,53746749,53748449,53755554,53758137,53764528,	C6	-2.10252	5.78e-07	-1.96431	0.000791296	-2.10259	0.000332558	1	0	1	0	0	0	0	0	1	0
ctrlafb_g1_1.3.0_00032134	chr2	+	227331049	227348224	227331049	227348224	4	227331049,227341322,227342770,227347107,	227331349,227341398,227342935,227348224,	Pla2g12a	2.20938	0.00133297	1.14186	0.16917	2.23942	1	1	0	0	0	1	0	0	0	0	0
ctrlafb_g1_1.3.0_00032229	chr2	-	88382612	88589737	88382612	88589737	19	88382612,88385574,88386281,88386514,88387528,88388533,88389576,88392130,88395072,88396133,88400312,88401153,88402830,88404174,88404473,88406990,88407823,88408151,88589594,	88382936,88385711,88386418,88386722,88387691,88388707,88389761,88392331,88395211,88396337,88400460,88401300,88403026,88404374,88404648,88407157,88407888,88408356,88589737,	Lrrcc1	2.58409	0.000106126	1.88596	0.00397062	1.5774	1	1	0	0	0	1	0	0	0	0	0
ctrlafb_g1_1.3.0_00032463	chr2	+	172635460	172812395	172635460	172812395	7	172635460,172719634,172729221,172768537,172802858,172807464,172810810,	172635849,172719692,172729416,172768717,172803065,172807681,172812395,	Pdgfc	2.33134	2.84e-10	3.12803	0.000198768	2.56678	1	1	1	0	0	0	0	0	1	0	0
ctrlafb_g1_1.3.0_00032802	chr2	+	180178643	180198814	180178643	180198814	22	180178643,180178964,180179184,180181478,180181706,180181870,180184465,180185323,180185813,180186251,180187648,180189851,180190136,180190644,180190893,180191491,180192466,180193255,180194069,180194490,180194982,180197805,	180178878,180179103,180179354,180181561,180181777,180181939,180184673,180185475,180185976,180186475,180187788,180189935,180190368,180190776,180190995,180191617,180192553,180193467,180194235,180194591,180195090,180198814,	Iqgap3	3.00106	1.27e-08	1.30366	0.0129276	-0.146674	0.0946841	1	0	0	0	1	0	0	0	0	0
ctrlafb_g1_1.3.0_00032803	chr2	+	180186084	180198814	180186084	180198814	13	180186084,180187648,180189851,180190136,180190644,180190893,180191491,180192466,180193255,180194069,180194490,180194982,180197805,	180186475,180187788,180189935,180190368,180190776,180190995,180191617,180192553,180193467,180194235,180194591,180195090,180198814,	Iqgap3	3.18418	4.54e-08	1.30366	0.00886525	0.33631	0.076001	1	0	0	0	1	0	0	0	0	0
ctrlafb_g1_1.3.0_00032842	chr2	+	200039674	200044698	200039674	200044698	9	200039674,200041704,200042223,200042619,200043364,200043660,200043884,200044104,200044381,	200041284,200041988,200042335,200042703,200043482,200043723,200043991,200044255,200044698,	Ppm1j	25.2045	7.28e-11	14.4634	0.000397693	27.4013	0.103042	1	1	0	0	0	0	0	1	0	0
ctrlafb_g1_1.3.0_00032919	chr2	-	54152434	54238172	54152434	54238172	13	54152434,54195832,54198992,54201293,54205043,54206108,54210003,54224480,54226943,54229015,54234069,54235311,54238060,	54152527,54196023,54199124,54201380,54205214,54206336,54210169,54224593,54227186,54229185,54234207,54235458,54238172,	Not RefSeq	2.21402	0.000537869	4.56329	0.000201654	2.31858	1	1	1	0	0	0	0	0	1	0	0
ctrlafb_g1_1.3.0_00032947	chr2	-	123063224	123069085	123063224	123069085	7	123063224,123063883,123064588,123065397,123065803,123067921,123068814,	123063565,123063996,123064795,123065620,123065915,123068164,123069085,	Ccna2	2.78502	0.000431091	2.71821	0.0545637	2.29598	1	1	0	0	0	1	0	0	0	0	0
ctrlafb_g1_1.3.0_00032976	chr2	-	180320593	180333088	180320593	180333088	10	180320593,180321274,180322353,180322926,180323191,180323575,180325285,180325538,180326273,180332843,	180321124,180321347,180322474,180323059,180323328,180323741,180325432,180325688,180326336,180333088,	Rhbg	7.64436	4.66e-20	4.23562	0.000398168	11.0382	0.0667333	1	1	0	0	0	0	0	1	0	0
ctrlafb_g1_1.3.0_00033005	chr2	-	193147943	193176960	193147943	193176960	12	193147943,193148903,193150027,193151081,193153755,193154818,193155403,193166042,193166239,193169036,193170492,193176685,	193148189,193149140,193150157,193151213,193153907,193154966,193155535,193166140,193166293,193169101,193170643,193176960,	Phgdh	9.26615	3.69e-15	5.91256	0.00200884	107543	0.994361	1	1	0	0	0	0	0	1	0	0
ctrlafb_g1_1.3.0_00033182	chr2	+	240502411	240509374	240502411	240509374	5	240502411,240504002,240506718,240507116,240508651,	240502649,240504214,240506820,240507309,240509374,	Not RefSeq	2.3121	0.000140131	2.34712	0.0160125	1.62033	0.530248	1	0	0	0	1	0	0	0	0	0
ctrlafb_g1_1.3.0_00033239	chr2	-	88077197	88092667	88077197	88092667	6	88077197,88080902,88082545,88083751,88090925,88092182,	88077882,88081057,88082607,88083843,88091122,88092667,	Car2	6.71057	3.39e-06	2.66728	0.00342673	9.08711	0.000152102	1	1	1	1	0	0	0	0	0	0
ctrlafb_g1_1.3.0_00033247	chr2	-	112969307	113015780	112969307	113015780	14	112969307,112973891,112975414,112992717,112995697,113000292,113000761,113001932,113004751,113005638,113007550,113009253,113013999,113015580,	112970514,112974034,112975521,112992871,112995835,113000411,113000839,113002013,113004847,113005748,113007618,113009372,113014135,113015780,	Not RefSeq	2.37104	7.38e-06	1.9673	0.0110672	2.50807	1	1	0	0	0	1	0	0	0	0	0
ctrlafb_g1_1.3.0_00033392	chr2	+	144678212	144756698	144678212	144756698	13	144678212,144679266,144693183,144695768,144702473,144702954,144704879,144715961,144717938,144718370,144721934,144734668,144751080,	144678376,144679360,144693267,144695873,144702530,144703073,144705025,144716094,144718015,144718466,144722014,144734781,144756698,	Dclk1	2.74829	0.000112096	1.12703	0.304616	0.122738	0.0763582	1	0	0	0	1	0	0	0	0	0
ctrlafb_g1_1.3.0_00033393	chr2	+	144693146	144756698	144693146	144756698	11	144693146,144695765,144702473,144702954,144704879,144715961,144717938,144718370,144721934,144734668,144751080,	144693267,144695873,144702530,144703073,144705025,144716094,144718015,144718466,144722014,144734781,144756698,	Dclk1	2.80735	8.84e-05	1.12703	0.305589	0.172155	0.0361178	1	0	0	0	1	0	0	0	0	0
ctrlafb_g1_1.3.0_00033406	chr2	+	180172089	180198814	180172089	180198814	27	180172089,180173999,180175489,180175886,180177638,180178711,180178964,180179184,180181478,180181706,180181870,180184465,180185323,180185813,180186251,180187648,180189851,180190136,180190644,180190893,180191491,180192466,180193255,180194069,180194490,180194982,180197805,	180172371,180174156,180175610,180176049,180177728,180178878,180179103,180179354,180181561,180181777,180181939,180184673,180185475,180185976,180186475,180187788,180189935,180190368,180190776,180190995,180191617,180192553,180193467,180194235,180194591,180195090,180198814,	Iqgap3	3.16037	9.59e-10	1.30366	0.00794621	4.93166	0.231526	1	0	0	0	1	0	0	0	0	0
ctrlafb_g1_1.3.0_00033455	chr2	+	203892684	203931559	203892684	203931559	18	203892684,203893657,203895798,203898896,203902464,203905638,203906453,203910032,203914651,203915470,203916396,203918313,203921235,203923909,203925565,203926333,203926678,203927356,	203892730,203893821,203895871,203898945,203902594,203905782,203906608,203910138,203914753,203915638,203916586,203918502,203921351,203924017,203925663,203926439,203926789,203931559,	Sort1	3.01636	3.83e-17	3.29784	0.000598086	2.6104	1	1	1	0	0	0	0	0	1	0	0
ctrlafb_g1_1.3.0_00033472	chr2	+	235130946	235133719	235130946	235133719	2	235130946,235132861,	235131183,235133719,	Ddit4l	128.445	2.98e-09	147.817	0.000198531	23.9096	0.00848703	1	1	0	0	0	0	0	1	0	0
ctrlafb_g1_1.3.0_00033489	chr2	-	21024391	21032007	21024391	21032007	4	21024391,21025847,21026189,21031883,	21025249,21025908,21026229,21032007,	Atp6ap1l	4.28496	0.000156058	-1.13696	0.613413	6.55037	0.13805	1	0	0	0	1	0	0	0	0	0
ctrlafb_g1_1.3.0_00033515	chr2	-	54152437	54205215	54152437	54205215	5	54152437,54195832,54198992,54201293,54205043,	54152527,54196023,54199124,54201380,54205215,	Not RefSeq	2.6283	1.39e-05	4.56329	0.000600841	4.78766	1	1	1	0	0	0	0	0	1	0	0
ctrlafb_g1_1.3.0_00033529	chr2	-	88077199	88083838	88077199	88083838	4	88077199,88080902,88082545,88083751,	88077882,88080936,88082607,88083838,	Car2	6.04408	1.56e-05	2.66728	0.00496722	1.01211	0.201276	1	1	0	0	0	0	0	1	0	0
ctrlafb_g1_1.3.0_00033531	chr2	-	88382602	88410436	88382602	88410436	19	88382602,88385574,88386281,88386514,88387528,88388535,88389576,88392130,88395072,88396133,88400312,88401153,88402830,88404174,88404473,88406990,88407823,88408151,88410394,	88382936,88385711,88386418,88386722,88387693,88388707,88389761,88392331,88395211,88396337,88400460,88401300,88403026,88404374,88404648,88407157,88407888,88408356,88410436,	Lrrcc1	2.57723	0.000118967	1.88596	0.00357214	0	1	1	0	0	0	1	0	0	0	0	0
ctrlafb_g1_1.3.0_00033538	chr2	-	113000171	113017104	113000171	113017104	12	113000171,113000761,113001932,113004751,113005638,113007550,113009253,113013999,113015580,113016425,113016593,113017071,	113000411,113000839,113002013,113004847,113005748,113007618,113009372,113014135,113015802,113016487,113016708,113017104,	Not RefSeq	2.39714	0.000137159	4.89	0.00645422	0	1	1	0	0	0	1	0	0	0	0	0
ctrlafb_g1_1.3.0_00033572	chr2	-	180322261	180333076	180322261	180333076	8	180322261,180322926,180323191,180323575,180325285,180325538,180326150,180332843,	180322474,180323059,180323328,180323741,180325432,180325688,180326336,180333076,	Rhbg	7.16778	5.13e-15	4.23562	0.000605694	17.9198	0.245862	1	1	0	0	0	0	0	1	0	0
ctrlafb_g1_1.3.0_00033619	chr2	-	218916013	218918538	218916013	218918538	2	218916013,218917381,	218917175,218918538,	Not RefSeq	2.03797	4.6e-07	1.7188	0.00059976	2.26862	0.501189	1	0	0	0	1	0	0	0	0	0
ctrlafb_g1_1.3.0_00033652	chr2	+	39527650	39597775	39527650	39597775	8	39527650,39568522,39578309,39582623,39583999,39586446,39591698,39595564,	39527736,39568653,39578499,39582703,39584055,39586551,39591834,39597775,	Elovl7	8.11632	1.29e-09	1.54337	0.15027	12.1901	0.0157018	1	0	0	0	1	0	0	0	0	0
ctrlafb_g1_1.3.0_00033677	chr2	+	127762254	127779640	127762254	127779640	14	127762254,127762423,127765660,127767556,127769508,127772101,127772498,127773359,127774025,127774241,127774943,127776092,127777761,127779079,	127762346,127762519,127766578,127767656,127769860,127772205,127772600,127773508,127774158,127774332,127775087,127776217,127777867,127779640,	Plk4	2.13335	0.00377742	1.00357	0.970048	0.153681	0.195191	1	0	0	0	1	0	0	0	0	0
ctrlafb_g1_1.3.0_00033720	chr2	+	200039674	200044257	200039674	200044257	8	200039674,200041170,200041704,200042223,200042619,200043364,200043660,200044104,	200040010,200041284,200041988,200042335,200042703,200043482,200043723,200044257,	Ppm1j	19.514	1.56e-09	14.4634	0.000197707	23.1513	0.485979	1	1	0	0	0	0	0	1	0	0
ctrlafb_g1_1.3.0_00033722	chr2	+	203853009	203931559	203853009	203931559	21	203853009,203877654,203879351,203892628,203893657,203895798,203898896,203902467,203905638,203906453,203910032,203914651,203915470,203916396,203918313,203921235,203923909,203925565,203926333,203926678,203927356,	203853331,203877713,203879424,203892730,203893821,203895871,203898945,203902594,203905782,203906608,203910138,203914753,203915638,203916586,203918502,203921351,203924017,203925663,203926439,203926789,203931559,	Sort1	3.0463	3.5e-18	3.29784	0.000785238	0	1	1	1	0	0	0	0	0	1	0	0
ctrlafb_g1_1.3.0_00033734	chr2	+	232765049	232782667	232765049	232782667	9	232765049,232769384,232771194,232772446,232773832,232778343,232779518,232781926,232782644,	232765190,232769534,232771272,232772542,232773940,232778403,232779631,232781984,232782667,	Bdh2	2.22622	0.000451039	1.24018	0.320096	1.47525	0.557179	1	0	0	0	1	0	0	0	0	0
ctrlafb_g1_1.3.0_00033747	chr2	-	12328646	12337251	12328646	12337251	2	12328646,12337132,	12331303,12337251,	Not RefSeq	2.0796	0.000457143	-1.04774	0.906429	2.06598	0.127083	1	0	0	0	1	0	0	0	0	0
ctrlafb_g1_1.3.0_00033778	chr2	-	96522046	96532700	96522046	96532700	3	96522046,96529100,96532673,	96525372,96529277,96532700,	Pkia	3.94639	1.42e-19	3.96804	0.000813835	1.60349	1	1	1	0	0	0	0	0	1	0	0
ctrlafb_g1_1.3.0_00033867	chr20	+	1643837	1647588	1643837	1647588	5	1643837,1644148,1644643,1647069,1647458,	1643909,1644414,1644921,1647344,1647588,	RT1-M4	26.3057	0.000506095	1.20572	0.232465	2.3713	0.843436	1	0	0	0	1	0	0	0	0	0
ctrlafb_g1_1.3.0_00033910	chr20	+	3194265	3215379	3194265	3215379	18	3194265,3202186,3202409,3203289,3204856,3205218,3206555,3206819,3208015,3208190,3209716,3210411,3211445,3211848,3212894,3213548,3214202,3214471,	3194323,3202315,3202511,3203517,3205003,3205317,3206741,3207065,3208098,3208341,3209881,3210521,3211689,3211975,3213112,3213782,3214351,3215379,	Ddr1	6.8659	1.1e-10	1.98836	0.0107396	6.97852	0.000259986	1	0	1	0	0	0	0	0	1	0
ctrlafb_g1_1.3.0_00033911	chr20	+	3196560	3214611	3196560	3214611	18	3196560,3202186,3202409,3203289,3204856,3205218,3206555,3206819,3208015,3208190,3209716,3210411,3211445,3211848,3212894,3213548,3214202,3214471,	3196706,3202315,3202511,3203517,3205003,3205317,3206741,3207065,3208098,3208341,3209881,3210521,3211689,3211975,3213112,3213782,3214351,3214611,	Ddr1	8.51977	3.49e-08	1.98836	0.00929669	0	1	1	0	0	0	1	0	0	0	0	0
ctrlafb_g1_1.3.0_00033981	chr20	+	5150810	5169264	5150810	5169264	9	5150810,5159720,5160262,5160497,5161570,5162982,5163371,5163566,5169063,	5150950,5159776,5160312,5160894,5162349,5163272,5163444,5163641,5169264,	Kifc1	2.16907	0.000256331	1.47762	0.0739928	1.93409	1	1	0	0	0	1	0	0	0	0	0
ctrlafb_g1_1.3.0_00034030	chr20	+	7376325	7386778	7376325	7386778	4	7376325,7384343,7385381,7385681,	7376354,7384798,7385665,7386778,	Cdkn1a	3.44696	7.19e-27	6.09467	0.00237295	0	1	1	1	0	0	0	0	0	1	0	0
ctrlafb_g1_1.3.0_00034031	chr20	+	7379375	7386778	7379375	7386778	4	7379375,7384343,7385381,7385681,	7379450,7384798,7385665,7386778,	Cdkn1a	3.43679	8.34e-27	6.09467	0.00316706	3.51792	4.49374e-10	1	1	1	1	0	0	0	0	0	0
ctrlafb_g1_1.3.0_00034114	chr20	+	18288079	18478908	18288079	18478908	20	18288079,18349917,18439796,18441820,18442922,18443445,18444251,18447020,18450295,18452478,18453414,18453756,18454837,18456715,18459384,18459991,18466257,18469318,18470714,18476398,	18288125,18349986,18439875,18441978,18442975,18443639,18444502,18447151,18450481,18452642,18453610,18453888,18454993,18456880,18459423,18460145,18466413,18469478,18470813,18478908,	Bicc1	2.83604	3.11e-13	1.9302	0.00121458	1.29528	0.593724	1	0	0	0	1	0	0	0	0	0
ctrlafb_g1_1.3.0_00034117	chr20	+	20018044	20044030	20018044	20044030	8	20018044,20020776,20024457,20025582,20028173,20030345,20030599,20043741,	20018119,20020838,20024613,20025705,20028343,20030508,20030740,20044030,	Cdk1	4.2933	7.55e-08	1.57314	0.00988338	3.86593	0.000606224	1	0	1	0	0	0	0	0	1	0
ctrlafb_g1_1.3.0_00034166	chr20	+	32000371	32008558	32000371	32008558	2	32000371,32007930,	32000435,32008558,	Pln	47.4426	3.84e-18	1.01822	0.203529	82.2676	1	1	0	0	0	1	0	0	0	0	0
ctrlafb_g1_1.3.0_00034299	chr20	-	3552207	3555613	3552207	3555613	8	3552207,3552402,3552629,3552845,3553098,3554622,3555068,3555541,	3552269,3552445,3552667,3552970,3553373,3554897,3555337,3555613,	RT1-CE3	-304.245	0.00126096	-1.52269	0.115547	-1.77667	1	1	0	0	0	1	0	0	0	0	0
ctrlafb_g1_1.3.0_00034324	chr20	-	3863665	3874196	3863665	3874196	17	3863665,3865388,3865743,3865950,3866480,3866659,3866929,3867789,3869197,3869553,3870842,3871132,3871618,3872267,3872770,3873475,3874009,	3865303,3865568,3865882,3866251,3866572,3866811,3867061,3867974,3869313,3869665,3871011,3871327,3871728,3872363,3873051,3873720,3874196,	G7c	5.27087	0.000978357	-1.01861	0.945044	3.66306	0.191847	1	0	0	0	1	0	0	0	0	0
ctrlafb_g1_1.3.0_00034426	chr20	-	9469888	9474604	9469888	9474604	3	9469888,9471882,9474503,	9470069,9472028,9474604,	Tff3	4.23148	0.00101676	1.66503	0.0750739	2.54871	0.392023	1	0	0	0	1	0	0	0	0	0
ctrlafb_g1_1.3.0_00034473	chr20	-	13595934	13603087	13595934	13603087	4	13595934,13598391,13599503,13602520,	13596907,13598545,13599590,13603087,	Gstt3	3.35468	6.47e-10	2.40291	0.0438455	3.69848	1	1	0	0	0	1	0	0	0	0	0
ctrlafb_g1_1.3.0_00034511	chr20	-	27252273	27254371	27252273	27254371	4	27252273,27252608,27253870,27254249,	27252411,27253619,27254124,27254371,	Ddit4	2.40891	2.18e-06	1.51593	0.126256	2.474	0.00330273	1	0	1	0	0	0	0	0	1	0
ctrlafb_g1_1.3.0_00034516	chr20	-	28092597	28162268	28092597	28162268	17	28092597,28096732,28098083,28098855,28105387,28105712,28107101,28107595,28108226,28110260,28110485,28111216,28112221,28113257,28113672,28114707,28162123,	28095408,28096913,28098247,28099004,28105620,28105880,28107188,28107984,28108420,28110292,28110649,28111383,28112401,28113360,28113815,28114931,28162268,	Unc5b	3.09951	0.00132599	1.63428	0.108782	1.78211	1	1	0	0	0	1	0	0	0	0	0
ctrlafb_g1_1.3.0_00034663	chr20	+	18459316	18478554	18459316	18478554	6	18459316,18459991,18466257,18469318,18470714,18476398,	18459423,18460145,18466413,18469478,18470813,18478554,	Bicc1	2.99574	1.25e-11	1.18612	0.131102	2.53281	0.290122	1	0	0	0	1	0	0	0	0	0
ctrlafb_g1_1.3.0_00034781	chr20	-	28094840	28112445	28094840	28112445	13	28094840,28096732,28098083,28098855,28105387,28105712,28107101,28107595,28108226,28110260,28110485,28111216,28112221,	28095408,28096913,28098247,28099004,28105620,28105880,28107188,28107984,28108420,28110292,28110649,28111383,28112445,	Unc5b	3.00026	0.00437649	1.63428	0.117243	9.73905	1	1	0	0	0	1	0	0	0	0	0
ctrlafb_g1_1.3.0_00034956	chr20	-	13596016	13599717	13596016	13599717	4	13596016,13598391,13599503,13599672,	13596907,13598545,13599590,13599717,	Gstt3	3.25087	4.03e-09	2.60198	0.0716703	3.55316	1	1	0	0	0	1	0	0	0	0	0
ctrlafb_g1_1.3.0_00034972	chr20	-	28093889	28108499	28093889	28108499	9	28093889,28096732,28098083,28098855,28105387,28105712,28107101,28107595,28108226,	28095408,28096913,28098247,28099004,28105620,28105880,28107188,28107984,28108499,	Unc5b	2.97745	0.00208996	1.63428	0.116606	2.28183	1	1	0	0	0	1	0	0	0	0	0
ctrlafb_g1_1.3.0_00035003	chr20	+	3196560	3215050	3196560	3215050	17	3196560,3202186,3202409,3203289,3204856,3205218,3206555,3206819,3208015,3208190,3209716,3211445,3211848,3212894,3213548,3214202,3214471,	3196706,3202315,3202511,3203517,3205003,3205317,3206741,3207065,3208098,3208341,3209881,3211689,3211975,3213112,3213782,3214351,3215050,	Ddr1	7.17994	2.6e-09	1.98836	0.0101654	1.04425	0.980124	1	0	0	0	1	0	0	0	0	0
ctrlafb_g1_1.3.0_00035042	chr20	+	18288079	18479962	18288079	18479962	21	18288079,18349917,18439796,18441820,18442922,18443445,18444251,18447020,18450295,18452478,18453414,18453756,18454837,18456715,18459384,18459991,18466257,18469318,18470714,18476398,18479928,	18288125,18349986,18439875,18441978,18442975,18443639,18444502,18447151,18450481,18452642,18453610,18453888,18454993,18456880,18459423,18460145,18466413,18469478,18470813,18476786,18479962,	Bicc1	2.45566	1.75e-07	1.02401	0.906648	-0.0234555	0.333243	1	0	0	0	1	0	0	0	0	0
ctrlafb_g1_1.3.0_00035043	chr20	+	18439679	18478908	18439679	18478908	18	18439679,18441820,18442922,18443445,18444251,18447020,18450295,18452478,18453414,18453756,18454837,18456715,18459384,18459991,18466257,18469318,18470714,18476398,	18439875,18441978,18442975,18443639,18444502,18447151,18450481,18452642,18453610,18453888,18454993,18456880,18459423,18460145,18466413,18469478,18470813,18478908,	Bicc1	2.82769	3.66e-13	1.9302	0.000396983	0.000174725	0.494864	1	0	0	0	1	0	0	0	0	0
ctrlafb_g1_1.3.0_00035105	chr20	-	13596020	13602322	13596020	13602322	4	13596020,13598391,13599503,13602301,	13596907,13598545,13599590,13602322,	Gstt3	3.24253	5.65e-09	2.60198	0.0680953	2.92427	1	1	0	0	0	1	0	0	0	0	0
ctrlafb_g1_1.3.0_00035157	chr20	+	5161445	5169264	5161445	5169264	5	5161445,5162982,5163371,5163566,5169063,	5162349,5163272,5163444,5163641,5169264,	Kifc1	2.20569	0.00124439	1.47762	0.0779872	0	1	1	0	0	0	1	0	0	0	0	0
ctrlafb_g1_1.3.0_00035184	chr20	+	18444107	18478899	18444107	18478899	14	18444107,18447020,18450295,18452478,18453414,18453756,18454837,18456715,18459384,18459991,18466257,18469318,18470714,18476398,	18444502,18447151,18450481,18452642,18453610,18453888,18454993,18456880,18459423,18460145,18466413,18469478,18470813,18478899,	Bicc1	2.96827	8.21e-14	1.9302	0.00119118	0	1	1	0	0	0	1	0	0	0	0	0
ctrlafb_g1_1.3.0_00035185	chr20	+	18452388	18478899	18452388	18478899	11	18452388,18453414,18453756,18454837,18456715,18459384,18459991,18466257,18469318,18470714,18476398,	18452642,18453610,18453888,18454993,18456880,18459423,18460145,18466413,18469478,18470813,18478899,	Bicc1	3.08265	6.33e-14	1.9302	0.00040858	1.30038	1	1	0	0	0	1	0	0	0	0	0
ctrlafb_g1_1.3.0_00035265	chr20	-	28092660	28115212	28092660	28115212	16	28092660,28096732,28098083,28098855,28105387,28105712,28107101,28107595,28108226,28110260,28110485,28111216,28112221,28113257,28113672,28114707,	28095408,28096913,28098247,28099004,28105620,28105880,28107188,28107984,28108420,28110292,28110649,28111383,28112401,28113360,28113815,28115212,	Unc5b	3.09162	0.0012018	1.63428	0.114577	6.37488	1	1	0	0	0	1	0	0	0	0	0
ctrlafb_g1_1.3.0_00035287	chr20	+	1643817	1647588	1643817	1647588	4	1643817,1644148,1644643,1647069,	1643909,1644414,1644862,1647588,	RT1-M4	27.1879	0.00028118	1.20572	0.236702	124684	0.999568	1	0	0	0	1	0	0	0	0	0
ctrlafb_g1_1.3.0_00035288	chr20	+	1643817	1650593	1643817	1650593	6	1643817,1644148,1644643,1647069,1647458,1649444,	1643909,1644414,1644921,1647344,1647571,1650593,	RT1-M4	35.7598	3.33e-05	1.20572	0.232107	23.2934	0.0169503	1	0	0	0	1	0	0	0	0	0
ctrlafb_g1_1.3.0_00035319	chr20	+	18288079	18478908	18288079	18478908	20	18288079,18349917,18439796,18441820,18442922,18443445,18444251,18447020,18450295,18452478,18453414,18453756,18454837,18456718,18459384,18459991,18466257,18469318,18470714,18476398,	18288125,18349986,18439875,18441978,18442975,18443639,18444502,18447151,18450481,18452642,18453610,18453888,18454993,18456880,18459423,18460145,18466413,18469478,18470813,18478908,	Bicc1	2.834	3.24e-13	1.9302	0.000390092	0.958663	0.00141356	1	0	0	0	1	0	0	0	0	0
ctrlafb_g1_1.3.0_00035341	chr20	-	1638248	1643892	1638248	1643892	7	1638248,1638426,1638659,1639520,1639945,1640465,1643811,	1638343,1638533,1638934,1639795,1640214,1640655,1643892,	RT1-M5	21.143	5.73e-06	1.40002	0.287377	3.41125	0.339836	1	0	0	0	1	0	0	0	0	0
ctrlafb_g1_1.3.0_00035381	chr20	-	28092602	28162204	28092602	28162204	16	28092602,28096732,28098083,28098855,28105387,28105712,28107101,28107595,28108226,28110485,28111216,28112221,28113257,28113672,28114707,28162123,	28095408,28096913,28098247,28099004,28105620,28105880,28107188,28107984,28108420,28110649,28111383,28112401,28113360,28113815,28114931,28162204,	Unc5b	3.08814	0.00119811	1.63428	0.108784	0	1	1	0	0	0	1	0	0	0	0	0
ctrlafb_g1_1.3.0_00035414	chr20	+	5160454	5169264	5160454	5169264	6	5160454,5161570,5162982,5163371,5163566,5169063,	5160894,5162349,5163272,5163444,5163641,5169264,	Kifc1	2.1474	0.00077526	1.47762	0.0775348	0.056399	1	1	0	0	0	1	0	0	0	0	0
ctrlafb_g1_1.3.0_00035457	chr20	+	47501957	47507663	47501957	47507663	3	47501957,47502321,47505959,	47501983,47502497,47507663,	Cd24	4.43113	3.8e-13	1.48421	0.134319	4.24281	0.000191022	1	0	1	0	0	0	0	0	1	0
ctrlafb_g1_1.3.0_00035512	chr20	-	28092597	28099077	28092597	28099077	4	28092597,28096732,28098083,28098855,	28095408,28096913,28098247,28099077,	Unc5b	3.38535	0.000276756	1.63428	0.11477	5.07735	1	1	0	0	0	1	0	0	0	0	0
ctrlafb_g1_1.3.0_00035569	chr20	+	18469298	18478899	18469298	18478899	3	18469298,18470714,18476398,	18469478,18470813,18478899,	Bicc1	3.10047	1.23e-12	3.09553	0.00100361	4.66487	0.0927959	1	1	0	0	0	0	0	1	0	0
ctrlafb_g1_1.3.0_00035583	chr20	-	1637682	1643861	1637682	1643861	7	1637682,1638426,1638659,1639520,1639945,1640465,1643811,	1638316,1638533,1638934,1639795,1640214,1640599,1643861,	RT1-M5	24.6342	5.2e-07	1.40002	0.283427	0.142106	0.201624	1	0	0	0	1	0	0	0	0	0
ctrlafb_g1_1.3.0_00035838	chr3	+	15161871	15190016	15161871	15190016	10	15161871,15161999,15165609,15167705,15169306,15179198,15181633,15182906,15187128,15189934,	15161971,15162061,15165756,15167816,15169437,15179284,15181785,15183104,15187156,15190016,	Morn5	2.75401	0.00179736	1.44429	0.107612	-1.60696	0.766688	1	0	0	0	1	0	0	0	0	0
ctrlafb_g1_1.3.0_00035907	chr3	+	44616037	44648897	44616037	44648897	9	44616037,44626109,44634945,44640679,44640986,44644512,44644944,44646166,44647669,	44616199,44626282,44635014,44640722,44641133,44644625,44645002,44647273,44648897,	Gca	2.15826	9.68e-06	2.13002	0.00855381	2.71622	1	1	0	0	0	1	0	0	0	0	0
ctrlafb_g1_1.3.0_00035908	chr3	+	44646065	44648897	44646065	44648897	2	44646065,44647669,	44647273,44648897,	Gca	2.16038	9.63e-05	2.13002	0.010276	-0.0605845	1	1	0	0	0	1	0	0	0	0	0
ctrlafb_g1_1.3.0_00035952	chr3	+	54948493	54959128	54948493	54959128	9	54948493,54951248,54954201,54954964,54955849,54956388,54957072,54957552,54957985,	54948598,54951370,54954446,54955047,54956052,54956525,54957221,54957688,54959128,	Cdca7	2.29383	0.000827955	2.11989	0.0247752	2.10646	0.19443	1	0	0	0	1	0	0	0	0	0
ctrlafb_g1_1.3.0_00036093	chr3	+	95475133	95510284	95475133	95510284	5	95475133,95479171,95492312,95504621,95509297,	95475634,95479306,95492419,95505416,95510284,	Ccdc34	4.03539	1.35e-14	1.5968	0.0086	3.37865	0.64407	1	0	0	0	1	0	0	0	0	0
ctrlafb_g1_1.3.0_00036115	chr3	+	105625265	105650392	105625265	105650392	10	105625265,105628272,105633421,105636078,105638866,105641838,105646604,105648353,105648665,105649339,	105625479,105628360,105633558,105636195,105638957,105641932,105646717,105648482,105648786,105650392,	Rad51	4.69753	2.76e-08	2.55439	0.00761676	4.35496	0.00219164	1	0	1	0	0	0	0	0	1	0
ctrlafb_g1_1.3.0_00036119	chr3	+	105757626	105770345	105757626	105770345	11	105757626,105757807,105765949,105766301,105766529,105766933,105767235,105767473,105768863,105769205,105769601,	105757659,105758349,105766076,105766439,105766699,105766959,105767360,105767523,105769033,105769252,105770345,	Spint1	4.37799	2.79e-08	2.41534	0.00380838	-1.21201	1	1	1	0	0	0	0	0	1	0	0
ctrlafb_g1_1.3.0_00036120	chr3	+	105757666	105770345	105757666	105770345	10	105757666,105765949,105766301,105766529,105766933,105767235,105767473,105768863,105769205,105769601,	105758349,105766076,105766439,105766699,105766959,105767360,105767523,105769033,105769252,105770345,	Spint1	4.45877	2.09e-08	2.41534	0.00498803	0.459895	1	1	1	0	0	0	0	0	1	0	0
ctrlafb_g1_1.3.0_00036128	chr3	+	106134200	106165155	106134200	106165155	10	106134200,106139134,106143216,106146036,106149803,106151319,106155004,106156028,106162631,106164091,	106134561,106139202,106143362,106146183,106149892,106151428,106155113,106156185,106162739,106165155,	Nusap1	2.75776	3.82e-05	4.17473	0.031842	2.02711	1	1	0	0	0	1	0	0	0	0	0
ctrlafb_g1_1.3.0_00036266	chr3	+	119676137	119691507	119676137	119691507	3	119676137,119678418,119689511,	119676183,119678515,119691507,	Prnp	3.11854	1.28e-15	1.24896	0.297735	3.14397	0.000395294	1	0	1	0	0	0	0	0	1	0
ctrlafb_g1_1.3.0_00036333	chr3	+	142457352	142462725	142457352	142462725	2	142457352,142460309,	142457625,142462725,	Srxn1	3.74841	2.9e-10	1.44255	0.0643298	3.84542	1.67144e-09	1	0	1	0	0	0	0	0	1	0
ctrlafb_g1_1.3.0_00036346	chr3	+	143086162	143087289	143086162	143087289	2	143086162,143086848,	143086626,143087289,	Id1	2.03995	0.000300097	1.18438	0.295255	1.15206	1	1	0	0	0	1	0	0	0	0	0
ctrlafb_g1_1.3.0_00036444	chr3	+	149504288	149523556	149504288	149523556	4	149504288,149516615,149519886,149522095,	149504785,149516782,149520010,149523556,	Fam83d	2.51618	0.00030263	2.15773	0.0054	2.44393	0.0842549	1	0	0	0	1	0	0	0	0	0
ctrlafb_g1_1.3.0_00036461	chr3	+	153925908	153954323	153925908	153954323	14	153925908,153930185,153932410,153933863,153935427,153938884,153943107,153944873,153946137,153948075,153949615,153950484,153952130,153952794,	153926121,153930278,153932481,153933955,153935647,153939043,153943397,153945298,153946276,153948174,153949728,153950588,153952279,153954323,	Mybl2	25.5297	2.26e-10	11.8129	0.00040282	0	1	1	1	0	0	0	0	0	1	0	0
ctrlafb_g1_1.3.0_00036469	chr3	+	154748977	154760324	154748977	154760324	5	154748977,154749414,154752900,154756425,154759388,	154749204,154749510,154753116,154756679,154760324,	Wisp2	5.20165	1.19e-08	7.38984	0.000400882	-0.236671	0.0267203	1	1	0	0	0	0	0	1	0	0
ctrlafb_g1_1.3.0_00036487	chr3	+	155800357	155802757	155800357	155802757	5	155800357,155800806,155801388,155801992,155802529,	155800510,155800833,155801474,155802256,155802757,	Ube2c	2.49103	0.000336965	-1.1066	0.126292	2.46278	0.0561455	1	0	0	0	1	0	0	0	0	0
ctrlafb_g1_1.3.0_00036558	chr3	+	169567488	169633121	169567488	169633121	5	169567488,169627457,169629553,169630676,169632846,	169568668,169627670,169629643,169632616,169633121,	Ntsr1	-24.6462	2.42e-05	-1.8084	0.0112022	-1.14432	0.944839	1	0	0	0	1	0	0	0	0	0
ctrlafb_g1_1.3.0_00036559	chr3	+	169572460	169633121	169572460	169633121	4	169572460,169627457,169629553,169630676,	169572506,169627670,169629643,169633121,	Ntsr1	-28.8091	2.96e-06	-1.8084	0.0102143	-7.07676	0.177116	1	0	0	0	1	0	0	0	0	0
ctrlafb_g1_1.3.0_00036840	chr3	-	42284803	42360817	42284803	42360817	16	42284803,42291365,42297986,42304693,42307592,42315825,42316417,42322750,42339566,42342772,42344282,42354824,42356226,42359818,42360547,42360743,	42286623,42291531,42298105,42304787,42307814,42316242,42316551,42322839,42339661,42342933,42344447,42355070,42356430,42359897,42360622,42360817,	Itgb6	3.20708	1.22e-05	4.13876	0.00120919	4.73008	1	1	1	0	0	0	0	0	1	0	0
ctrlafb_g1_1.3.0_00036863	chr3	-	48238528	48364143	48238528	48364143	27	48238528,48244713,48247048,48251165,48252827,48254956,48262723,48264326,48266381,48267897,48281947,48282811,48284243,48286120,48287089,48288518,48289804,48291932,48292721,48293617,48296441,48297178,48299157,48300920,48303277,48316896,48363942,	48241821,48244983,48247152,48251302,48252880,48255237,48262845,48264499,48266535,48268017,48282429,48283167,48284282,48286360,48287221,48288898,48290088,48292138,48292862,48293680,48296710,48297269,48299285,48301007,48303397,48317208,48364143,	Scn1a	31.1403	0.00134385	1.00393	0.770571	15.5754	0.480981	1	0	0	0	1	0	0	0	0	0
ctrlafb_g1_1.3.0_00036868	chr3	-	51361185	51374357	51361185	51374357	7	51361185,51363883,51366824,51369235,51373097,51373267,51374304,	51361815,51363981,51366928,51369381,51373162,51373419,51374357,	Spc25	3.00149	2.09e-06	2.86051	0.0104971	2.78994	0.0426222	1	0	0	0	1	0	0	0	0	0
ctrlafb_g1_1.3.0_00037013	chr3	-	88516836	88557065	88516836	88557065	9	88516836,88520382,88521556,88527307,88527478,88529980,88532829,88537236,88556935,	88520294,88520577,88521618,88527375,88527546,88530042,88533074,88537335,88557065,	Ehf	4.36967	1.78e-15	1.33266	0.0764	3.63488	1	1	0	0	0	1	0	0	0	0	0
ctrlafb_g1_1.3.0_00037028	chr3	-	90169888	90197990	90169888	90197990	4	90169888,90185018,90189561,90197884,	90175183,90185150,90189724,90197990,	Prrg4	2.7159	1.76e-11	3.60534	0.00020016	1.48949	1	1	1	0	0	0	0	0	1	0	0
ctrlafb_g1_1.3.0_00037029	chr3	-	90169886	90198790	90169886	90198790	6	90169886,90185018,90188083,90189561,90197884,90198358,	90175183,90185150,90188131,90189724,90198004,90198790,	Prrg4	2.72343	3.38e-11	3.60534	0.000396983	3.58713	1	1	1	0	0	0	0	0	1	0	0
ctrlafb_g1_1.3.0_00037049	chr3	-	99676951	99693232	99676951	99693232	12	99676951,99679690,99681653,99682171,99684406,99685418,99686389,99686709,99687519,99688073,99690095,99692840,	99679382,99679828,99681758,99682297,99684573,99685492,99686532,99686872,99687772,99688169,99690165,99693232,	Arhgap11a	2.02912	3.14e-05	3.41704	0.00635047	2.02844	1	1	0	0	0	1	0	0	0	0	0
ctrlafb_g1_1.3.0_00037050	chr3	-	99676951	99693607	99676951	99693607	11	99676951,99681653,99682171,99684406,99685418,99686389,99686709,99687519,99688073,99690095,99692840,	99679828,99681758,99682297,99684573,99685492,99686532,99686872,99687772,99688169,99690165,99693607,	Arhgap11a	2.00958	2.93e-05	3.41704	0.00669779	2.1054	1	1	0	0	0	1	0	0	0	0	0
ctrlafb_g1_1.3.0_00037170	chr3	-	115323510	115354906	115323510	115354906	25	115323510,115326389,115327551,115327864,115328199,115328660,115329469,115331019,115332070,115333831,115336471,115337363,115338178,115338375,115339647,115340805,115342837,115345092,115345360,115346434,115347725,115349534,115352054,115352275,115354582,	115324809,115326495,115327719,115328021,115328360,115328766,115329612,115331227,115332157,115334005,115336552,115337459,115338288,115338503,115339705,115341031,115342988,115345276,115345412,115346537,115347768,115349730,115352192,115352334,115354906,	Bub1	2.20465	2.94e-07	1.75978	0.0276025	46.7264	1	1	0	0	0	1	0	0	0	0	0
ctrlafb_g1_1.3.0_00037268	chr3	-	141322816	141330415	141322816	141330415	5	141322816,141325814,141326961,141327354,141329804,	141324636,141325991,141327084,141327432,141330415,	Vsx1	7.12709	0.000476727	1.04141	0.83572	5.04325	0.0328708	1	0	0	0	1	0	0	0	0	0
ctrlafb_g1_1.3.0_00037303	chr3	-	145032489	145043729	145032489	145043729	7	145032489,145034023,145034333,145036132,145037467,145038010,145043322,	145033927,145034239,145034447,145036284,145037686,145038100,145043729,	E2f1	2.16061	0.000959594	1.7207	0.0229469	2.18723	0.111861	1	0	0	0	1	0	0	0	0	0
ctrlafb_g1_1.3.0_00037329	chr3	-	147574258	147586991	147574258	147586991	11	147574258,147576485,147577353,147578557,147579017,147580855,147582027,147583028,147585119,147585757,147586902,	147576055,147576572,147577500,147578634,147579076,147580945,147582099,147583101,147585442,147585782,147586991,	Dsn1	3.19283	6.09e-07	1.41327	0.136219	8.06292	0.072793	1	0	0	0	1	0	0	0	0	0
ctrlafb_g1_1.3.0_00037450	chr3	-	169233897	169282410	169233897	169282410	79	169233897,169234412,169234626,169234791,169235008,169235244,169235518,169235786,169236030,169236227,169236518,169236759,169237112,169237339,169237578,169237814,169238078,169238311,169238548,169238811,169239043,169239897,169240300,169240498,169240876,169241186,169241558,169241943,169242616,169242915,169243101,169243779,169244022,169244456,169244815,169245113,169245363,169245662,169246559,169247732…	169234279,169234531,169234716,169234924,169235161,169235408,169235713,169235931,169236141,169236397,169236648,169237035,169237260,169237461,169237740,169237947,169238231,169238447,169238724,169238959,169239222,169240007,169240402,169240639,169241030,169241302,169241754,169242104,169242727,169243025,169243252,169243928,169244202,169244556,169245029,169245193,169245490,169245775,169246789,169247815…	Lama5	12.9002	1.6e-13	3.76683	0.000197472	60380.1	0.966224	1	1	0	0	0	0	0	1	0	0
ctrlafb_g1_1.3.0_00037753	chr3	+	169572478	169633121	169572478	169633121	5	169572478,169627457,169629553,169630676,169632846,	169572506,169627670,169629643,169632616,169633121,	Ntsr1	-50.3134	4.84e-06	-1.8084	0.00895166	0	1	1	0	0	0	1	0	0	0	0	0
ctrlafb_g1_1.3.0_00038014	chr3	-	169233897	169241773	169233897	169241773	26	169233897,169234412,169234626,169234791,169235008,169235518,169235786,169236030,169236227,169236518,169236759,169237112,169237339,169237578,169237814,169238078,169238311,169238548,169238811,169239043,169239897,169240300,169240498,169240876,169241186,169241558,	169234279,169234531,169234716,169234924,169235408,169235713,169235931,169236141,169236397,169236648,169237035,169237260,169237461,169237740,169237947,169238231,169238447,169238724,169238959,169239222,169240007,169240402,169240639,169241030,169241302,169241773,	Lama5	13.4955	1.32e-25	3.76683	0.000805153	3.15697	1	1	1	0	0	0	0	0	1	0	0
ctrlafb_g1_1.3.0_00038015	chr3	-	169233897	169282410	169233897	169282410	78	169233897,169234412,169234626,169234791,169235008,169235518,169235786,169236030,169236227,169236518,169236759,169237112,169237339,169237578,169237814,169238078,169238311,169238548,169238811,169239043,169239897,169240300,169240498,169240876,169241186,169241558,169241943,169242616,169242915,169243101,169243779,169244022,169244456,169244815,169245113,169245363,169245662,169246559,169247732,169247904…	169234279,169234531,169234716,169234924,169235408,169235713,169235931,169236141,169236397,169236648,169237035,169237260,169237461,169237740,169237947,169238231,169238447,169238724,169238959,169239222,169240007,169240402,169240639,169241030,169241302,169241754,169242104,169242727,169243025,169243252,169243928,169244202,169244556,169245029,169245193,169245490,169245775,169246789,169247815,169248005…	Lama5	12.8333	1.74e-13	3.76683	0.000396983	-0.0122437	0.240569	1	1	0	0	0	0	0	1	0	0
ctrlafb_g1_1.3.0_00038157	chr3	+	106134200	106165155	106134200	106165155	10	106134200,106139134,106143216,106146036,106149803,106151319,106155001,106156028,106162631,106164091,	106134561,106139202,106143362,106146183,106149892,106151428,106155113,106156185,106162739,106165155,	Nusap1	2.76123	4.09e-05	4.17473	0.0338145	4.75752	1	1	0	0	0	1	0	0	0	0	0
ctrlafb_g1_1.3.0_00038401	chr3	-	90169903	90198022	90169903	90198022	5	90169903,90185018,90188083,90189561,90197884,	90175183,90185150,90188131,90189724,90198022,	Prrg4	2.71661	3.83e-11	3.60534	0.000798403	1.74849	1	1	1	0	0	0	0	0	1	0	0
ctrlafb_g1_1.3.0_00038402	chr3	-	90169903	90198654	90169903	90198654	5	90169903,90185018,90189561,90197884,90198358,	90175183,90185150,90189724,90198004,90198654,	Prrg4	2.72401	1.66e-11	3.60534	0.000400882	1.45659	1	1	1	0	0	0	0	0	1	0	0
ctrlafb_g1_1.3.0_00038439	chr3	-	115323510	115334063	115323510	115334063	10	115323510,115326389,115327551,115327864,115328199,115328660,115329469,115331019,115332070,115333831,	115324809,115326495,115327719,115328021,115328360,115328766,115329612,115331227,115332157,115334063,	Bub1	2.08731	5.49e-05	1.75978	0.0274781	-4.33756	1	1	0	0	0	1	0	0	0	0	0
ctrlafb_g1_1.3.0_00038440	chr3	-	115323510	115354906	115323510	115354906	25	115323510,115326389,115327551,115327864,115328199,115328660,115329469,115331019,115332070,115333831,115336471,115337363,115338178,115338375,115339647,115340805,115342837,115345092,115345360,115346434,115347725,115349534,115352054,115352275,115354582,	115324809,115326495,115327719,115328021,115328360,115328766,115329612,115331227,115332157,115334005,115336552,115337459,115338288,115338503,115339705,115341031,115342988,115345276,115345412,115346537,115347768,115349636,115352192,115352334,115354906,	Bub1	2.20551	3.49e-07	1.75978	0.034986	-0.0350108	1	1	0	0	0	1	0	0	0	0	0
ctrlafb_g1_1.3.0_00038518	chr3	-	169233897	169282410	169233897	169282410	78	169233897,169234412,169234626,169234791,169235008,169235244,169235518,169236030,169236227,169236518,169236759,169237112,169237339,169237578,169237814,169238078,169238311,169238548,169238811,169239043,169239897,169240300,169240498,169240876,169241186,169241558,169241943,169242616,169242915,169243101,169243779,169244022,169244456,169244815,169245113,169245363,169245662,169246559,169247732,169247904…	169234279,169234531,169234716,169234924,169235161,169235408,169235931,169236141,169236397,169236648,169237035,169237260,169237461,169237740,169237947,169238231,169238447,169238724,169238959,169239222,169240007,169240402,169240639,169241030,169241302,169241754,169242104,169242727,169243025,169243252,169243928,169244202,169244556,169245029,169245193,169245490,169245775,169246789,169247815,169248005…	Lama5	12.9215	1.29e-13	3.76683	0.000608519	-3087.84	0.970706	1	1	0	0	0	0	0	1	0	0
ctrlafb_g1_1.3.0_00038653	chr3	+	95475023	95510394	95475023	95510394	6	95475023,95479171,95492312,95504621,95505275,95509297,	95475634,95479306,95492419,95504779,95505416,95510394,	Ccdc34	4.09231	4.43e-13	1.5968	0.00852836	4.23875	0.000427004	1	0	1	0	0	0	0	0	1	0
ctrlafb_g1_1.3.0_00038658	chr3	+	106133556	106165155	106133556	106165155	11	106133556,106139134,106143216,106146036,106149803,106151319,106155004,106156028,106159631,106162631,106164091,	106134561,106139202,106143362,106146183,106149892,106151428,106155113,106156185,106159747,106162739,106165155,	Nusap1	2.70542	7.64e-05	4.17473	0.035	1.82057	1	1	0	0	0	1	0	0	0	0	0
ctrlafb_g1_1.3.0_00038707	chr3	+	143086152	143087289	143086152	143087289	2	143086152,143086848,	143086631,143087289,	Id1	2.02988	0.00032805	1.18438	0.314774	1.18079	1	1	0	0	0	1	0	0	0	0	0
ctrlafb_g1_1.3.0_00038932	chr3	-	169233897	169239371	169233897	169239371	21	169233897,169234412,169234626,169234791,169235008,169235244,169235518,169235786,169236030,169236227,169236518,169236759,169237112,169237339,169237578,169237814,169238078,169238311,169238548,169238811,169239043,	169234279,169234531,169234716,169234924,169235161,169235408,169235713,169235931,169236141,169236397,169236648,169237035,169237260,169237461,169237740,169237947,169238231,169238447,169238724,169238959,169239371,	Lama5	13.1786	1.51e-26	3.76683	0.000396904	15.5269	0.00722436	1	1	0	0	0	0	0	1	0	0
ctrlafb_g1_1.3.0_00039031	chr3	+	54953785	54959128	54953785	54959128	7	54953785,54954964,54955849,54956388,54957072,54957552,54957985,	54954446,54955047,54956052,54956525,54957221,54957688,54959128,	Cdca7	2.33115	0.00067235	2.11989	0.0284398	0.234808	0.155611	1	0	0	0	1	0	0	0	0	0
ctrlafb_g1_1.3.0_00039070	chr3	+	106133556	106165155	106133556	106165155	11	106133556,106139134,106143216,106146036,106149803,106151319,106155001,106156028,106159631,106162631,106164091,	106134561,106139202,106143362,106146183,106149892,106151428,106155113,106156185,106159747,106162739,106165155,	Nusap1	2.70855	8.09e-05	4.17473	0.0361928	4.32794	1	1	0	0	0	1	0	0	0	0	0
ctrlafb_g1_1.3.0_00039129	chr3	+	153929997	153954323	153929997	153954323	13	153929997,153932410,153933863,153935427,153938884,153943107,153944873,153946137,153948075,153949615,153950484,153952130,153952794,	153930278,153932481,153933955,153935647,153939043,153943397,153945298,153946276,153948174,153949728,153950588,153952279,153954323,	Mybl2	25.615	2.81e-10	11.8129	0.000396432	21.0527	1.70839e-08	1	1	1	1	0	0	0	0	0	0
ctrlafb_g1_1.3.0_00039263	chr3	-	90169893	90198241	90169893	90198241	5	90169893,90185018,90189561,90197884,90198203,	90175183,90185150,90189724,90198004,90198241,	Prrg4	2.71787	1.66e-11	3.60534	0.000408247	0.000114496	1	1	1	0	0	0	0	0	1	0	0
ctrlafb_g1_1.3.0_00039295	chr3	-	114651566	114663282	114651566	114663282	8	114651566,114653796,114654240,114655338,114657021,114659396,114662570,114663225,	114651726,114653871,114654331,114655454,114657194,114659506,114662692,114663282,	Not RefSeq	4.01706	9.4e-06	3.759	0.000400802	2.58817	0.504613	1	1	0	0	0	0	0	1	0	0
ctrlafb_g1_1.3.0_00039298	chr3	-	115324518	115354906	115324518	115354906	25	115324518,115326389,115327551,115327864,115328199,115328660,115329469,115331019,115332070,115333831,115336471,115337363,115338178,115338375,115339647,115340805,115342837,115345092,115345360,115346434,115347725,115349534,115352054,115352275,115354582,	115324809,115326495,115327719,115328021,115328360,115328766,115329612,115331227,115332157,115334005,115336552,115337459,115338288,115338503,115339705,115341031,115342988,115345273,115345412,115346537,115347768,115349730,115352192,115352334,115354906,	Bub1	2.25143	1.61e-07	1.75978	0.0277778	1.68629	1	1	0	0	0	1	0	0	0	0	0
ctrlafb_g1_1.3.0_00039301	chr3	-	116902553	116908203	116902553	116908203	2	116902553,116908179,	116903787,116908203,	Not RefSeq	2.95572	0.000468485	1.07014	0.254886	90017.4	0.999439	1	0	0	0	1	0	0	0	0	0
ctrlafb_g1_1.3.0_00039358	chr3	-	169233897	169236462	169233897	169236462	10	169233897,169234412,169234626,169234791,169235008,169235244,169235518,169235786,169236030,169236227,	169234279,169234531,169234716,169234924,169235161,169235408,169235713,169235931,169236141,169236462,	Lama5	14.6028	6.78e-27	4.56135	0.000402172	25.8032	0.0454545	1	1	0	0	0	0	0	1	0	0
ctrlafb_g1_1.3.0_00039359	chr3	-	169233897	169239286	169233897	169239286	20	169233897,169234412,169234626,169234791,169235008,169235244,169235518,169236030,169236227,169236518,169236759,169237112,169237339,169237578,169237814,169238078,169238311,169238548,169238811,169239043,	169234279,169234531,169234716,169234924,169235161,169235408,169235931,169236141,169236397,169236648,169237035,169237260,169237461,169237740,169237947,169238231,169238447,169238724,169238959,169239286,	Lama5	13.2852	4.06e-27	3.76683	0.000398804	0.0512132	0.234777	1	1	0	0	0	0	0	1	0	0
ctrlafb_g1_1.3.0_00039360	chr3	-	169235661	169238924	169235661	169238924	12	169235661,169236030,169236227,169236518,169236759,169237112,169237339,169237578,169237814,169238078,169238311,169238548,	169235931,169236141,169236397,169236648,169237035,169237260,169237461,169237740,169237947,169238231,169238447,169238924,	Lama5	12.5533	5.55e-19	3.11071	0.0013947	12.0168	0.320753	1	1	0	0	0	0	0	1	0	0
ctrlafb_g1_1.3.0_00039418	chr3	+	44644355	44648897	44644355	44648897	4	44644355,44644944,44646166,44647669,	44644625,44645002,44647273,44648897,	Gca	2.18474	3.79e-05	2.13002	0.00780624	-1.42409	1	1	0	0	0	1	0	0	0	0	0
ctrlafb_g1_1.3.0_00039488	chr3	+	143086146	143087234	143086146	143087234	2	143086146,143086846,	143086626,143087234,	Id1	2.04552	0.000282877	1.18438	0.312783	6.60307	1	1	0	0	0	1	0	0	0	0	0
ctrlafb_g1_1.3.0_00039521	chr3	+	153938131	153954323	153938131	153954323	10	153938131,153938884,153943107,153944873,153946137,153948075,153949615,153950484,153952130,153952794,	153938153,153939043,153943397,153945298,153946276,153948174,153949728,153950588,153952279,153954323,	Mybl2	23.7725	8.22e-10	11.8129	0.000601202	12.5427	1	1	1	0	0	0	0	0	1	0	0
ctrlafb_g1_1.3.0_00039523	chr3	+	154748960	154760324	154748960	154760324	5	154748960,154749418,154752900,154756425,154759388,	154749208,154749510,154753116,154756679,154760324,	Wisp2	5.20165	1.19e-08	7.38984	0.000196078	17226	0.987627	1	1	0	0	0	0	0	1	0	0
ctrlafb_g1_1.3.0_00039615	chr3	-	90169886	90198256	90169886	90198256	6	90169886,90185018,90188083,90189561,90197884,90198203,	90175183,90185150,90188131,90189724,90198004,90198256,	Prrg4	2.71694	3.59e-11	3.60534	0.000794755	0.689737	1	1	1	0	0	0	0	0	1	0	0
ctrlafb_g1_1.3.0_00039629	chr3	-	107880978	107887085	107880978	107887085	6	107880978,107881598,107883652,107884073,107886400,107887033,	107881319,107881731,107883812,107884399,107886642,107887085,	Not RefSeq	4.13994	9.77e-06	2.04782	0.100324	3.2186	0.0837701	1	0	0	0	1	0	0	0	0	0
ctrlafb_g1_1.3.0_00039651	chr3	-	114654236	114663323	114654236	114663323	6	114654236,114655338,114657021,114659396,114662570,114663225,	114654331,114655454,114657194,114659506,114662692,114663323,	Not RefSeq	4.24614	5.19e-05	3.759	0.000198138	2.84897	0.296024	1	1	0	0	0	0	0	1	0	0
ctrlafb_g1_1.3.0_00039655	chr3	-	116888850	116903642	116888850	116903642	4	116888850,116893736,116898874,116902547,	116888903,116893891,116899081,116903642,	Not RefSeq	3.70127	8.09e-06	1.07014	0.256171	15.1215	0.210396	1	0	0	0	1	0	0	0	0	0
ctrlafb_g1_1.3.0_00039684	chr3	-	152378977	153172076	152378977	153172076	26	152378977,152383567,152386702,152387705,152400533,152405133,152407565,152410941,152414462,152417604,152421778,152423260,152432929,152445153,152473826,152512017,152551357,152585413,152610808,152651978,152653473,152748937,152968763,153076153,153086813,153171949,	152382699,152383702,152386865,152387830,152400664,152405306,152407714,152411076,152414616,152417720,152421875,152423296,152433005,152445240,152474013,152512165,152551492,152585449,152611081,152652080,152653674,152749046,152969058,153076235,153087084,153172076,	Ptprt	3.79774	0.00191098	1.21633	0.115719	3.31778	0.0232932	1	0	0	0	1	0	0	0	0	0
ctrlafb_g1_1.3.0_00039822	chr3	+	105641675	105650424	105641675	105650424	5	105641675,105646604,105648353,105648665,105649437,	105641932,105646717,105648482,105648786,105650424,	Rad51	4.58161	2.65e-09	1.74419	0.00855551	0.338826	0.164319	1	0	0	0	1	0	0	0	0	0
ctrlafb_g1_1.3.0_00039824	chr3	+	105766230	105770419	105766230	105770419	8	105766230,105766529,105766933,105767235,105767473,105768863,105769205,105769601,	105766439,105766699,105766959,105767360,105767523,105769033,105769252,105770419,	Spint1	4.16198	1.12e-06	2.41534	0.0036305	4.73068	1	1	1	0	0	0	0	0	1	0	0
ctrlafb_g1_1.3.0_00039881	chr3	+	153948524	153951413	153948524	153951413	2	153948524,153950484,	153949728,153951413,	Mybl2	44.7086	0.000101808	9.07119	0.000396511	35.1232	0.00675257	1	1	0	0	0	0	0	1	0	0
ctrlafb_g1_1.3.0_00039958	chr3	-	42284803	42360814	42284803	42360814	15	42284803,42291365,42297986,42304693,42307592,42315825,42316417,42322750,42339566,42342772,42344282,42354824,42356226,42359818,42360547,	42286623,42291531,42298105,42304787,42307814,42316242,42316551,42322839,42339661,42342933,42344447,42355070,42356430,42359897,42360814,	Itgb6	3.26886	1.18e-05	4.13876	0.000594059	2.54315	1	1	1	0	0	0	0	0	1	0	0
ctrlafb_g1_1.3.0_00039989	chr3	-	88516917	88530115	88516917	88530115	6	88516917,88520382,88521556,88527307,88527478,88529980,	88520294,88520577,88521618,88527375,88527546,88530115,	Ehf	4.5794	1.29e-15	1.33266	0.0764929	7.18403	1	1	0	0	0	1	0	0	0	0	0
ctrlafb_g1_1.3.0_00039993	chr3	-	90169813	90188273	90169813	90188273	3	90169813,90185018,90188083,	90175183,90185150,90188273,	Prrg4	2.70156	6.42e-11	3.60534	0.000401204	1.63239	1	1	1	0	0	0	0	0	1	0	0
ctrlafb_g1_1.3.0_00039994	chr3	-	90169813	90198204	90169813	90198204	6	90169813,90185018,90188083,90189561,90197884,90198110,	90175183,90185150,90188131,90189724,90198004,90198204,	Prrg4	2.71628	3.47e-11	3.60534	0.000591833	0.321571	1	1	1	0	0	0	0	0	1	0	0
ctrlafb_g1_1.3.0_00039997	chr3	-	99676951	99686568	99676951	99686568	7	99676951,99679690,99681653,99682171,99684406,99685418,99686389,	99679382,99679828,99681758,99682297,99684573,99685492,99686568,	Arhgap11a	2.08356	6.67e-05	3.41704	0.00495835	1.86123	1	1	1	0	0	0	0	0	1	0	0
ctrlafb_g1_1.3.0_00040035	chr3	-	116898932	116903784	116898932	116903784	2	116898932,116902547,	116899081,116903784,	Not RefSeq	3.16828	0.000117724	1.07014	0.264181	1.06778	1	1	0	0	0	1	0	0	0	0	0
ctrlafb_g1_1.3.0_00040060	chr3	-	147574160	147579605	147574160	147579605	5	147574160,147576485,147577353,147578557,147579017,	147576055,147576572,147577500,147578634,147579605,	Dsn1	2.6245	9.56e-05	1.41327	0.128968	1.92598	1	1	0	0	0	1	0	0	0	0	0
ctrlafb_g1_1.3.0_00040061	chr3	-	147574160	147585531	147574160	147585531	9	147574160,147576485,147577353,147578557,147579017,147580855,147582027,147583028,147585119,	147576055,147576572,147577500,147578634,147579076,147580945,147582099,147583101,147585531,	Dsn1	3.11284	1.07e-06	1.41327	0.135032	1.96443	0.482753	1	0	0	0	1	0	0	0	0	0
ctrlafb_g1_1.3.0_00040319	chr3	-	116893788	116903695	116893788	116903695	3	116893788,116898874,116902547,	116893891,116899081,116903695,	Not RefSeq	3.52808	1.87e-05	1.07014	0.263004	-0.0466917	0.335025	1	0	0	0	1	0	0	0	0	0
ctrlafb_g1_1.3.0_00040424	chr4	+	12465089	12495028	12465089	12495028	8	12465089,12476394,12478530,12487477,12489138,12493684,12494046,12494947,	12465230,12476551,12478658,12487606,12489291,12494035,12494464,12495028,	Gnai1	2.13759	1.74e-06	3.03451	0.00741038	0	1	1	0	0	0	1	0	0	0	0	0
ctrlafb_g1_1.3.0_00040436	chr4	+	21829383	21915634	21829383	21915634	28	21829383,21829954,21831757,21833165,21837950,21839889,21840747,21841897,21850346,21856702,21856960,21857273,21857489,21857954,21858352,21859718,21861270,21862400,21871946,21873793,21875031,21890040,21895535,21897584,21899463,21907709,21910373,21912014,	21829518,21830024,21831802,21833327,21838007,21840080,21840918,21842021,21850517,21856815,21857070,21857398,21857692,21858124,21858513,21859891,21861416,21862507,21872023,21873876,21875234,21890140,21895675,21897740,21899660,21907915,21910519,21915634,	Abcb1b	39.3206	2.07e-164	18.2706	0.000199322	22.7084	1	1	1	0	0	0	0	0	1	0	0
ctrlafb_g1_1.3.0_00040493	chr4	+	43874852	44041870	43874852	44041870	27	43874852,43909800,43918909,43925960,43933409,43934239,43935282,43938862,43940747,43942671,43947736,43973005,43975751,43985329,43987782,43991275,43992004,43995399,43997689,43999070,44001983,44013653,44018708,44026387,44038042,44038783,44039951,	43875041,43909910,43919017,43926175,43933498,43934402,43935407,43939108,43940839,43942853,43947927,43973099,43975837,43986037,43987910,43991312,43992254,43995478,43997839,43999297,44002083,44013904,44018863,44026476,44038214,44038888,44041870,	Cftr	6.51961	1.27e-12	1.89742	0.118488	6.77595	0.00101513	1	0	1	0	0	0	0	0	1	0
ctrlafb_g1_1.3.0_00040531	chr4	+	57549260	57555387	57549260	57555387	10	57549260,57550054,57550578,57550958,57551563,57551835,57552343,57552884,57553583,57555135,	57549632,57550135,57550811,57551059,57551664,57551945,57552433,57553083,57553667,57555387,	Cpa1	15.3267	1.46e-06	4.30503	0.0379772	-3.12155	0.775061	1	0	0	0	1	0	0	0	0	0
ctrlafb_g1_1.3.0_00040540	chr4	+	61755871	61774000	61755871	61774000	11	61755871,61757582,61760066,61761559,61762843,61766236,61766624,61767144,61768166,61768788,61770925,	61755907,61757783,61760233,61761675,61762920,61766358,61766730,61767225,61768249,61768870,61774000,	Akr1b10	18.558	0.000152988	2.07759	0.0808061	13.892	1.43238e-06	1	0	1	0	0	0	0	0	1	0
ctrlafb_g1_1.3.0_00040541	chr4	+	61794352	61806916	61794352	61806916	10	61794352,61797753,61798441,61799614,61801414,61801802,61802303,61802882,61803527,61806565,	61794434,61797920,61798557,61799691,61801536,61801908,61802384,61802965,61803609,61806916,	Akr1b7	54.5882	5.8e-08	16.4728	0.0001998	0	1	1	1	0	0	0	0	0	1	0	0
ctrlafb_g1_1.3.0_00040565	chr4	+	66232208	66248866	66232208	66248866	5	66232208,66241720,66245305,66245920,66247961,	66232388,66241794,66245471,66246020,66248866,	Clec2l	2.04107	0.00189112	1.32739	0.161655	1.85493	1	1	0	0	0	1	0	0	0	0	0
ctrlafb_g1_1.3.0_00040569	chr4	+	66889446	66899174	66889446	66899174	4	66889446,66891929,66896944,66898317,	66889538,66892152,66897127,66899174,	Rab19	3.70568	6.64e-05	1.22538	0.153332	3.16869	0.0903761	1	0	0	0	1	0	0	0	0	0
ctrlafb_g1_1.3.0_00040573	chr4	+	67396360	67800036	67396360	67800036	4	67396360,67519215,67752686,67790595,	67396781,67519328,67752823,67800036,	LOC679651	-4.24845	6.88e-05	-2.09014	0.0625743	-4.24733	0.0253309	1	0	0	0	1	0	0	0	0	0
ctrlafb_g1_1.3.0_00040644	chr4	+	79789513	79854301	79789513	79854301	7	79789513,79825800,79836491,79843551,79844020,79851747,79852413,	79789605,79825846,79836577,79843651,79844118,79851959,79854301,	Snx10	6.7717	7.71e-23	1.09636	0.0554207	2.01266	0.377708	1	0	0	0	1	0	0	0	0	0
ctrlafb_g1_1.3.0_00040645	chr4	+	79808638	79854299	79808638	79854299	7	79808638,79825800,79836491,79843551,79844020,79851747,79852413,	79808754,79825846,79836577,79843651,79844118,79851959,79854299,	Snx10	7.02946	8.24e-23	1.09636	0.0534865	11.0533	3.39737e-07	1	0	1	0	0	0	0	0	1	0
ctrlafb_g1_1.3.0_00040688	chr4	+	96380009	96385092	96380009	96385092	6	96380009,96380570,96382779,96383956,96384737,96385014,	96380225,96380716,96382899,96384059,96384916,96385092,	Mad2l1	2.60184	0.00102195	2.06328	0.0043956	2.74713	1	1	1	0	0	0	0	0	1	0	0
ctrlafb_g1_1.3.0_00040689	chr4	+	96380039	96389819	96380039	96389819	6	96380039,96380570,96382779,96383956,96384737,96385358,	96380225,96380716,96382899,96384059,96384916,96389819,	Mad2l1	2.19873	3.11e-08	2.45684	0.00382602	1.84885	1	1	1	0	0	0	0	0	1	0	0
ctrlafb_g1_1.3.0_00040739	chr4	+	117348330	117363967	117348330	117363967	13	117348330,117349200,117356860,117358495,117358672,117358845,117359174,117361085,117361328,117361615,117362364,117362661,117363302,	117348698,117349485,117357059,117358556,117358725,117358962,117359383,117361179,117361434,117361743,117362532,117362765,117363967,	Rtkn	3.3524	0.00045539	1.88415	0.00819181	0	1	1	0	0	0	1	0	0	0	0	0
ctrlafb_g1_1.3.0_00040876	chr4	+	149465515	149500145	149465515	149500145	26	149465515,149467012,149467684,149468489,149468867,149469694,149470724,149471398,149472469,149472867,149475126,149476763,149478392,149478879,149481648,149482679,149486447,149488662,149490267,149490875,149491571,149492686,149493676,149495260,149497654,149499938,	149465672,149467072,149467803,149468562,149469010,149469794,149470839,149471506,149472579,149472979,149475269,149476879,149478520,149478997,149481758,149482809,149486540,149488784,149490360,149490946,149491609,149492760,149493750,149495406,149497755,149500145,	Fancd2	3.0571	1.4e-05	2.57363	0.0236995	1.55032	1	1	0	0	0	1	0	0	0	0	0
ctrlafb_g1_1.3.0_00040885	chr4	+	151255241	151405821	151255241	151405821	11	151255241,151364519,151365717,151369126,151373622,151383559,151383985,151391043,151391569,151392841,151405530,	151255744,151364576,151365808,151369282,151373711,151383621,151384127,151391117,151391671,151392990,151405821,	Syn2	7.10957	0.000423498	1.31982	0.40189	0.0838479	0.194008	1	0	0	0	1	0	0	0	0	0
ctrlafb_g1_1.3.0_00040886	chr4	+	151255241	151413220	151255241	151413220	13	151255241,151364519,151365717,151369126,151373622,151383559,151383985,151391043,151391569,151392841,151405530,151409372,151412329,	151255744,151364576,151365808,151369282,151373711,151383621,151384127,151391117,151391671,151392990,151405590,151409624,151413220,	Syn2	24.0569	9.41e-05	1.31982	0.411222	13.4182	0.378762	1	0	0	0	1	0	0	0	0	0
ctrlafb_g1_1.3.0_00040965	chr4	+	160394814	160423710	160394814	160423710	14	160394814,160395987,160397201,160399148,160401559,160402625,160406495,160406907,160407864,160409759,160421202,160422082,160422488,160423676,	160394975,160396070,160397521,160399471,160401879,160402951,160406809,160407221,160408356,160410079,160421513,160422111,160422595,160423710,	Cd163	-2.14407	1.45e-05	-2.32305	0.010103	-2.98222	1	1	0	0	0	1	0	0	0	0	0
ctrlafb_g1_1.3.0_00040966	chr4	+	160394833	160428208	160394833	160428208	16	160394833,160395987,160397201,160399148,160401559,160402625,160406495,160406907,160407864,160408042,160409759,160421202,160422082,160422488,160423676,160427408,	160394975,160396070,160397521,160399471,160401879,160402951,160406809,160407221,160407959,160408356,160410079,160421513,160422111,160422595,160423765,160428208,	Cd163	-2.17223	5.71e-06	-2.32305	0.00848828	-1.29015	1	1	0	0	0	1	0	0	0	0	0
ctrlafb_g1_1.3.0_00040977	chr4	+	160953545	160956862	160953545	160956862	6	160953545,160953808,160954498,160955275,160955715,160956269,	160953572,160953955,160954624,160955589,160955818,160956862,	Cdca3	2.38967	0.000211177	2.59134	0.0201383	2.34807	0.0498	1	0	0	0	1	0	0	0	0	0
ctrlafb_g1_1.3.0_00041060	chr4	+	173683142	173699256	173683142	173699256	7	173683142,173686908,173688314,173692664,173694474,173695867,173698539,	173683301,173687100,173688488,173692762,173694568,173695943,173699256,	Gucy2c	31.1978	0.000832414	6.76967	0.000199481	6.51263	0.133599	1	1	0	0	0	0	0	1	0	0
ctrlafb_g1_1.3.0_00041231	chr4	-	32758868	32776220	32758868	32776220	12	32758868,32759632,32759874,32760967,32761700,32764147,32765343,32765925,32766260,32769106,32772600,32776065,	32759226,32759787,32759955,32761067,32761806,32764273,32765470,32766026,32766445,32769343,32772871,32776220,	Asns	2.35695	0.00136711	2.69671	0.00941915	2.57328	1	1	0	0	0	1	0	0	0	0	0
ctrlafb_g1_1.3.0_00041232	chr4	-	32758599	32776506	32758599	32776506	12	32758599,32759632,32759874,32760967,32761700,32764147,32765343,32765925,32766260,32769106,32772600,32776456,	32759226,32759787,32759955,32761067,32761806,32764273,32765470,32766026,32766445,32769343,32772871,32776506,	Asns	2.40394	0.00100796	2.69671	0.00899281	1.28295	1	1	0	0	0	1	0	0	0	0	0
ctrlafb_g1_1.3.0_00041234	chr4	-	33680878	33830131	33680878	33830131	14	33680878,33692887,33701158,33701292,33703580,33705517,33717526,33720358,33790727,33795459,33802767,33808246,33811803,33830064,	33681149,33693156,33701196,33701354,33703632,33705611,33717624,33720483,33790925,33795582,33802839,33808408,33811895,33830131,	Ica1	4.6257	1.8e-09	5.39679	0.000197628	3.41163	1	1	1	0	0	0	0	0	1	0	0
ctrlafb_g1_1.3.0_00041235	chr4	-	33680878	33830443	33680878	33830443	15	33680878,33692887,33701158,33701292,33703580,33705517,33717526,33720358,33790727,33795459,33802767,33808246,33811803,33828327,33830377,	33681149,33693156,33701196,33701354,33703632,33705611,33717624,33720483,33790925,33795582,33802839,33808408,33811895,33828476,33830443,	Ica1	4.62148	6.64e-10	5.39679	0.000199641	0	1	1	1	0	0	0	0	0	1	0	0
ctrlafb_g1_1.3.0_00041407	chr4	-	82909623	82953679	82909623	82953679	8	82909623,82916131,82923182,82926339,82928955,82937349,82953263,82953513,	82913178,82916311,82923347,82926533,82929157,82937530,82953422,82953679,	Scrn1	-2.9045	0.0040006	-2.35114	0.0327545	-2.99006	5.15847e-05	1	0	1	0	0	0	0	0	1	0
ctrlafb_g1_1.3.0_00041486	chr4	-	117360988	117367581	117360988	117367581	10	117360988,117364353,117364602,117364865,117365772,117366198,117366346,117366740,117366912,117367390,	117364275,117364427,117364764,117364965,117365899,117366251,117366412,117366802,117367134,117367581,	Wdr54	2.69804	0.00130967	1.0222	0.935083	0.0984862	0.0635364	1	0	0	0	1	0	0	0	0	0
ctrlafb_g1_1.3.0_00041487	chr4	-	117517611	117529128	117517611	117529128	8	117517611,117520402,117520825,117521857,117522521,117523282,117524576,117528956,	117518710,117520527,117520917,117521964,117522673,117523404,117524760,117529128,	Mthfd2	3.23234	0.00109736	1.94073	0.00487805	3.5167	0.0395672	1	0	0	0	1	0	0	0	0	0
ctrlafb_g1_1.3.0_00041496	chr4	-	117839863	117849584	117839863	117849584	7	117839863,117840713,117841611,117845918,117848174,117848562,117849458,	117840212,117840831,117841762,117846856,117848257,117848678,117849584,	Clec4f	-2.72568	1.82e-10	-3.10052	0.00320064	-2.67531	4.83508e-06	1	1	1	1	0	0	0	0	0	0
ctrlafb_g1_1.3.0_00041597	chr4	-	148452669	148543743	148452669	148543743	13	148452669,148461928,148482895,148502960,148512498,148519572,148523206,148526997,148528558,148532867,148534062,148539693,148543643,	148452947,148461990,148483054,148503094,148512558,148519648,148523390,148527096,148528895,148532937,148534123,148539774,148543743,	Rad18	2.16103	0.00232735	1.64327	0.00138889	3.80744	0.140785	1	0	0	0	1	0	0	0	0	0
ctrlafb_g1_1.3.0_00041633	chr4	-	153036955	153062248	153036955	153062248	5	153036955,153040926,153042428,153046182,153061841,	153039635,153041065,153042499,153046248,153062248,	Tmem72	51.3139	1.21e-05	1.04282	0.828446	0.121237	0.0390462	1	0	0	0	1	0	0	0	0	0
ctrlafb_g1_1.3.0_00041646	chr4	-	155624127	155638784	155624127	155638784	5	155624127,155629666,155632962,155633553,155638601,	155626702,155630256,155633094,155633747,155638784,	Lrtm2	-3.27862	3.16e-20	-3.7667	0.00138889	-2.99009	1	1	1	0	0	0	0	0	1	0	0
ctrlafb_g1_1.3.0_00041647	chr4	-	155624127	155640352	155624127	155640352	6	155624127,155629666,155632962,155633643,155638601,155640302,	155626702,155630256,155633094,155633747,155638712,155640352,	Lrtm2	-3.28461	2.6e-20	-3.7667	0.000593003	-5.59856	1	1	1	0	0	0	0	0	1	0	0
ctrlafb_g1_1.3.0_00041760	chr4	-	165812314	165820500	165812314	165820500	5	165812314,165813581,165814258,165815314,165820338,	165812440,165813687,165814436,165815439,165820500,	Clec2d2	8.44112	9.77e-05	-1.20039	0.103729	0.728164	0.0750902	1	0	0	0	1	0	0	0	0	0
ctrlafb_g1_1.3.0_00041942	chr4	+	79809696	79854236	79809696	79854236	7	79809696,79825800,79836491,79843551,79844020,79851747,79852413,	79809723,79825846,79836577,79843651,79844118,79851959,79854236,	Snx10	6.79519	3.45e-23	1.09636	0.0584327	-0.192128	0.193021	1	0	0	0	1	0	0	0	0	0
ctrlafb_g1_1.3.0_00042027	chr4	+	160394833	160428208	160394833	160428208	15	160394833,160395987,160397201,160399148,160401559,160402625,160406495,160406907,160407864,160408042,160409759,160421202,160422082,160422488,160423676,	160394975,160396070,160397521,160399471,160401879,160402951,160406809,160407221,160407959,160408356,160410079,160421513,160422111,160422595,160428208,	Cd163	-2.37909	2.15e-07	-2.32305	0.0127872	-2.39671	1	1	0	0	0	1	0	0	0	0	0
ctrlafb_g1_1.3.0_00042171	chr4	-	117360882	117367346	117360882	117367346	9	117360882,117364353,117364602,117364865,117365772,117366198,117366346,117366740,117366912,	117364275,117364427,117364764,117364965,117365899,117366251,117366412,117366802,117367346,	Wdr54	2.57353	0.00203293	1.0222	0.929625	-0.0775585	0.0421291	1	0	0	0	1	0	0	0	0	0
ctrlafb_g1_1.3.0_00042228	chr4	-	155624127	155638985	155624127	155638985	6	155624127,155629666,155632962,155633553,155638601,155638818,	155626702,155630256,155633094,155633747,155638712,155638985,	Lrtm2	-3.26413	3.54e-20	-3.7667	0.000997805	-2.76886	1	1	1	0	0	0	0	0	1	0	0
ctrlafb_g1_1.3.0_00042229	chr4	-	155624127	155640341	155624127	155640341	6	155624127,155629666,155632962,155633553,155638601,155640302,	155626702,155630256,155633094,155633747,155638712,155640341,	Lrtm2	-3.28011	3.6e-20	-3.7667	0.000590087	-3.49818	1	1	1	0	0	0	0	0	1	0	0
ctrlafb_g1_1.3.0_00042311	chr4	+	21858313	21912591	21858313	21912591	14	21858313,21859718,21861270,21862400,21871946,21873793,21875031,21890040,21895535,21897584,21899463,21907709,21910373,21912014,	21858513,21859891,21861416,21862507,21872023,21873876,21875234,21890140,21895675,21897740,21899660,21907915,21910519,21912591,	Abcb1b	37.4539	3.52e-154	18.2706	0.000200481	35.5071	1	1	1	0	0	0	0	0	1	0	0
ctrlafb_g1_1.3.0_00042441	chr4	+	160394833	160428208	160394833	160428208	16	160394833,160395987,160397201,160399148,160401559,160402625,160406495,160406907,160407864,160408042,160409759,160421202,160422082,160422488,160423676,160427408,	160394975,160396070,160397521,160399471,160401879,160402951,160406809,160407221,160407959,160408356,160410079,160421513,160422111,160422595,160424872,160428208,	Cd163	-2.21774	7.51e-07	-2.32305	0.0103093	-1.06348	1	1	0	0	0	1	0	0	0	0	0
ctrlafb_g1_1.3.0_00042599	chr4	-	155624127	155635055	155624127	155635055	5	155624127,155629666,155632962,155633643,155635030,	155626702,155630256,155633094,155633747,155635055,	Lrtm2	-3.28833	3.86e-20	-3.7667	0.00078911	-0.183597	1	1	1	0	0	0	0	0	1	0	0
ctrlafb_g1_1.3.0_00042910	chr4	-	148452479	148543752	148452479	148543752	12	148452479,148482895,148502960,148512498,148519572,148523206,148526997,148528558,148532867,148534062,148539693,148543643,	148452947,148483054,148503094,148512558,148519648,148523390,148527096,148528895,148532937,148534123,148539774,148543752,	Rad18	2.1451	0.00171934	1.28344	0.00137822	-1.10307	0.921511	1	0	0	0	1	0	0	0	0	0
ctrlafb_g1_1.3.0_00042919	chr4	-	155624127	155628149	155624127	155628149	2	155624127,155628109,	155626702,155628149,	Lrtm2	-3.2362	2.23e-22	-3.7667	0.000990884	-3.22729	1	1	1	0	0	0	0	0	1	0	0
ctrlafb_g1_1.3.0_00043023	chr4	+	79843523	79854263	79843523	79854263	4	79843523,79844020,79851747,79852413,	79843651,79844118,79851959,79854263,	Snx10	6.80806	2.93e-23	1.09636	0.0606902	5.58071	0.185212	1	0	0	0	1	0	0	0	0	0
ctrlafb_g1_1.3.0_00043031	chr4	+	96380039	96389819	96380039	96389819	5	96380039,96380570,96382779,96383956,96384737,	96380225,96380716,96382899,96384059,96389819,	Mad2l1	2.22104	1.64e-08	2.45684	0.00385239	2.54454	1	1	1	0	0	0	0	0	1	0	0
ctrlafb_g1_1.3.0_00043040	chr4	+	117348330	117363967	117348330	117363967	13	117348330,117349200,117356860,117358495,117358672,117358845,117359174,117361085,117361328,117361615,117362364,117362661,117363302,	117348698,117349485,117357036,117358556,117358725,117358962,117359383,117361179,117361434,117361743,117362532,117362765,117363967,	Rtkn	3.3524	0.00045539	1.88415	0.00928918	2.93711	0.656552	1	0	0	0	1	0	0	0	0	0
ctrlafb_g1_1.3.0_00043065	chr4	+	149422196	149500326	149422196	149500326	44	149422196,149424535,149427478,149428468,149428661,149429325,149431697,149435162,149452064,149453287,149455112,149455534,149456008,149456322,149458358,149460490,149461514,149461829,149465563,149467012,149467684,149468489,149468867,149469694,149470724,149471398,149472469,149472867,149475126,149476763,149478392,149478879,149481648,149482679,149486447,149488662,149490267,149490875,149491571,149492686…	149422228,149424630,149427618,149428535,149428764,149429385,149431749,149435240,149452188,149453374,149455216,149455634,149456116,149456357,149458501,149460624,149461645,149461939,149465672,149467072,149467803,149468562,149469010,149469794,149470839,149471506,149472579,149472979,149475269,149476879,149478520,149478997,149481758,149482809,149486540,149488784,149490360,149490946,149491609,149492760…	Fancd2	3.00138	3.9e-07	2.57363	0.0217348	2.86868	1	1	0	0	0	1	0	0	0	0	0
ctrlafb_g1_1.3.0_00043148	chr4	-	33680878	33830131	33680878	33830131	14	33680878,33692887,33701158,33703580,33705517,33717526,33720358,33790727,33795459,33802767,33808246,33811803,33828327,33830064,	33681149,33693156,33701196,33703632,33705611,33717624,33720483,33790925,33795582,33802839,33808408,33811895,33828476,33830131,	Ica1	4.73905	7.5e-10	5.39679	0.000201207	1.67942	1	1	1	0	0	0	0	0	1	0	0
ctrlafb_g1_1.3.0_00043193	chr4	-	117839834	117849641	117839834	117849641	6	117839834,117840713,117845918,117848174,117848562,117849458,	117840212,117840831,117846856,117848257,117848678,117849641,	Clec4f	-2.69372	4.09e-10	-3.10052	0.00484653	-1.4653	0.408328	1	1	0	0	0	0	0	1	0	0
ctrlafb_g1_1.3.0_00043226	chr4	-	155624127	155637946	155624127	155637946	5	155624127,155629666,155632962,155633553,155637902,	155626702,155630256,155633094,155633747,155637946,	Lrtm2	-3.28451	5.16e-20	-3.7667	0.000609756	-3.00509	1	1	1	0	0	0	0	0	1	0	0
ctrlafb_g1_1.3.0_00043293	chr4	+	57553406	57555387	57553406	57555387	2	57553406,57555135,	57553667,57555387,	Cpa1	22.7283	2.76e-07	4.30503	0.0382996	8.58789	0.005851	1	0	0	0	1	0	0	0	0	0
ctrlafb_g1_1.3.0_00043294	chr4	+	61714242	61806916	61714242	61806916	10	61714242,61716396,61717804,61718497,61801414,61801802,61802303,61802882,61803527,61806565,	61714389,61716563,61717920,61718574,61801536,61801908,61802384,61802965,61803609,61806916,	Akr1b7	36.8321	1.19e-13	16.4728	0.000402091	36.7673	0.171779	1	1	0	0	0	0	0	1	0	0
ctrlafb_g1_1.3.0_00043325	chr4	+	117349042	117363967	117349042	117363967	12	117349042,117356860,117358495,117358672,117358845,117359174,117361085,117361328,117361615,117362364,117362661,117363302,	117349485,117357059,117358556,117358725,117358962,117359383,117361179,117361434,117361743,117362532,117362765,117363967,	Rtkn	3.23851	0.000744284	1.88415	0.0102	1.46357	1	1	0	0	0	1	0	0	0	0	0
ctrlafb_g1_1.3.0_00043364	chr4	+	160406196	160428208	160406196	160428208	10	160406196,160406907,160407864,160408042,160409759,160421202,160422082,160422488,160423676,160427408,	160406809,160407221,160407959,160408356,160410079,160421513,160422111,160422595,160423765,160428208,	Cd163	-2.28723	2.2e-08	-2.32305	0.0104	-1.80125	1	1	0	0	0	1	0	0	0	0	0
ctrlafb_g1_1.3.0_00043402	chr4	-	33680878	33830230	33680878	33830230	15	33680878,33692887,33701158,33701292,33703580,33705517,33717526,33720358,33790727,33795459,33802767,33808246,33811803,33828327,33830064,	33681149,33693156,33701196,33701354,33703632,33705611,33717624,33720483,33790925,33795582,33802839,33808408,33811895,33828476,33830230,	Ica1	4.68082	4.28e-10	5.39679	0.000198138	0.397276	1	1	1	0	0	0	0	0	1	0	0
ctrlafb_g1_1.3.0_00043521	chr4	+	61794342	61806916	61794342	61806916	10	61794342,61797753,61798441,61799614,61801414,61801802,61802303,61802882,61803527,61806565,	61794434,61797920,61798557,61799691,61801536,61801908,61802384,61802965,61803607,61806916,	Akr1b7	54.5882	5.8e-08	16.4728	0.000202061	1.23752	0.0236382	1	1	0	0	0	0	0	1	0	0
ctrlafb_g1_1.3.0_00043523	chr4	+	61802204	61806916	61802204	61806916	4	61802204,61802882,61803527,61806565,	61802384,61802965,61803609,61806916,	Akr1b7	51.2128	1.89e-06	16.4728	0.000604961	24.9503	0.232819	1	1	0	0	0	0	0	1	0	0
ctrlafb_g1_1.3.0_00043544	chr4	+	79808812	79854196	79808812	79854196	7	79808812,79825800,79836491,79843551,79844020,79851747,79852413,	79808852,79825846,79836577,79843651,79844118,79851959,79854196,	Snx10	6.86119	2.5e-23	1.09636	0.0592949	0.302618	0.15411	1	0	0	0	1	0	0	0	0	0
ctrlafb_g1_1.3.0_00043558	chr4	+	117347095	117363967	117347095	117363967	12	117347095,117356860,117358495,117358672,117358845,117359174,117361085,117361328,117361615,117362364,117362661,117363302,	117347309,117357059,117358556,117358725,117358962,117359383,117361179,117361434,117361743,117362532,117362765,117363967,	Rtkn	3.45577	0.00158802	1.88415	0.00945068	4.04436	0.308091	1	0	0	0	1	0	0	0	0	0
ctrlafb_g1_1.3.0_00043559	chr4	+	117358357	117363967	117358357	117363967	9	117358357,117358672,117358845,117359174,117361085,117361328,117362364,117362661,117363302,	117358556,117358725,117358962,117359383,117361179,117361743,117362532,117362765,117363967,	Rtkn	3.82623	0.000926679	1.88415	0.00715137	0.108375	0.189272	1	0	0	0	1	0	0	0	0	0
ctrlafb_g1_1.3.0_00043591	chr4	+	149424558	149497924	149424558	149497924	42	149424558,149427478,149428468,149428661,149429325,149431697,149435162,149452064,149453287,149455112,149455534,149456008,149456322,149458358,149460490,149461514,149461829,149465563,149467012,149467684,149468489,149468867,149469694,149470724,149471398,149472469,149472867,149475126,149476763,149478392,149478879,149481648,149482679,149486447,149488662,149490267,149490875,149491571,149492686,149493676…	149424630,149427618,149428535,149428764,149429385,149431749,149435240,149452188,149453374,149455216,149455634,149456116,149456357,149458501,149460624,149461645,149461939,149465672,149467072,149467803,149468562,149469010,149469794,149470839,149471506,149472579,149472979,149475269,149476879,149478520,149478997,149481758,149482809,149486540,149488784,149490360,149490946,149491609,149492760,149493750…	Fancd2	3.12601	2.74e-07	2.57363	0.0216877	0	1	1	0	0	0	1	0	0	0	0	0
ctrlafb_g1_1.3.0_00043608	chr4	+	160394833	160428208	160394833	160428208	14	160394833,160395987,160397204,160399148,160401559,160402625,160406495,160406907,160407864,160408042,160409759,160421202,160422082,160422488,	160394975,160396070,160397521,160399471,160401879,160402951,160406809,160407221,160407959,160408356,160410079,160421513,160422111,160428208,	Cd163	-2.39359	2.84e-07	-2.32305	0.0106931	-2.93091	1	1	0	0	0	1	0	0	0	0	0
ctrlafb_g1_1.3.0_00043666	chr4	-	32758988	32776589	32758988	32776589	11	32758988,32759632,32760967,32761700,32764147,32765343,32765925,32766260,32769106,32772600,32776456,	32759226,32759955,32761067,32761806,32764273,32765470,32766026,32766445,32769343,32772871,32776589,	Asns	2.47849	0.00156481	2.69671	0.0119725	11.7197	1	1	0	0	0	1	0	0	0	0	0
ctrlafb_g1_1.3.0_00043667	chr4	-	33680878	33830128	33680878	33830128	13	33680878,33692887,33701158,33703580,33705517,33717526,33720358,33790727,33795459,33802767,33808246,33811803,33830064,	33681149,33693156,33701196,33703632,33705611,33717624,33720483,33790925,33795582,33802839,33808408,33811895,33830128,	Ica1	4.69444	2.59e-09	5.39679	0.000202429	21.8601	1	1	1	0	0	0	0	0	1	0	0
ctrlafb_g1_1.3.0_00043792	chr4	+	21829383	21913622	21829383	21913622	27	21829383,21829954,21831757,21833165,21837950,21839889,21840747,21841897,21850346,21856702,21856960,21857273,21857489,21857954,21858352,21859718,21861270,21862400,21871946,21873793,21890040,21895535,21897584,21899463,21907709,21910373,21912014,	21829518,21830024,21831802,21833327,21838007,21840080,21840918,21842021,21850517,21856815,21857070,21857398,21857692,21858124,21858513,21859891,21861416,21862507,21872023,21873876,21890140,21895675,21897740,21899660,21907915,21910519,21913622,	Abcb1b	39.4556	3.3e-164	18.2706	0.000200481	51.7105	1	1	1	0	0	0	0	0	1	0	0
ctrlafb_g1_1.3.0_00043804	chr4	+	66242065	66248866	66242065	66248866	4	66242065,66245305,66245920,66247961,	66242168,66245471,66246020,66248866,	Clec2l	2.02485	0.00216761	1.32739	0.13954	2.61325	0.128153	1	0	0	0	1	0	0	0	0	0
ctrlafb_g1_1.3.0_00043831	chr4	+	117359057	117363967	117359057	117363967	7	117359057,117361085,117361328,117361615,117362364,117362661,117363302,	117359383,117361179,117361434,117361743,117362532,117362765,117363967,	Rtkn	4.12915	0.0039223	1.88415	0.00766902	0.115281	0.233971	1	0	0	0	1	0	0	0	0	0
ctrlafb_g1_1.3.0_00044017	chr5	+	9136980	9170799	9136980	9170799	16	9136980,9145501,9145912,9148545,9150967,9152683,9155240,9156517,9159953,9161282,9165197,9165737,9166914,9167255,9167786,9169635,	9137356,9145606,9145983,9148637,9151187,9152851,9155311,9156621,9160186,9161650,9165339,9165851,9167030,9167359,9167965,9170799,	Mybl1	6.58857	2.23e-12	3.89226	0.00218167	0	1	1	1	0	0	0	0	0	1	0	0
ctrlafb_g1_1.3.0_00044150	chr5	+	60787123	60848620	60787123	60848620	18	60787123,60791419,60793255,60795530,60797548,60798987,60801209,60807617,60814502,60815907,60822948,60830462,60835343,60837052,60840542,60841774,60844798,60847662,	60787209,60791514,60793340,60795646,60797691,60799055,60801301,60807715,60814570,60816005,60823034,60830585,60835453,60837283,60840638,60841942,60844901,60848620,	Melk	4.07955	2.01e-05	4.65696	0.0036452	0	1	1	1	0	0	0	0	0	1	0	0
ctrlafb_g1_1.3.0_00044179	chr5	+	65947512	66116330	65947512	66116330	8	65947512,65982031,66066380,66083420,66101332,66104372,66107725,66115185,	65947641,65982138,66066568,66083552,66101582,66104548,66107856,66116330,	Lppr1	-3.83945	1.43e-10	-1.91329	0.0495802	-3.91204	1	1	0	0	0	1	0	0	0	0	0
ctrlafb_g1_1.3.0_00044180	chr5	+	65982029	66116452	65982029	66116452	7	65982029,66066380,66083420,66101332,66104372,66107725,66115185,	65982138,66066568,66083552,66101582,66104548,66107856,66116452,	Lppr1	-3.86826	1.2e-10	-1.91329	0.0468844	0	1	1	0	0	0	1	0	0	0	0	0
ctrlafb_g1_1.3.0_00044257	chr5	+	109337767	109344307	109337767	109344307	2	109337767,109341016,	109338504,109344307,	Dmrta1	4.34449	0.000517022	1.80355	0.241	4.60227	0.0404988	1	0	0	0	1	0	0	0	0	0
ctrlafb_g1_1.3.0_00044289	chr5	+	122320075	122503437	122320075	122503437	16	122320075,122395299,122398664,122401381,122430515,122430959,122433717,122436867,122438394,122438669,122460822,122463455,122467768,122469368,122470522,122502544,	122320128,122395358,122398993,122401505,122430807,122431076,122433916,122437015,122438553,122438751,122461038,122463637,122467863,122469473,122470597,122503437,	Lepr	-5.15383	3.55e-11	-2.87968	0.0100402	-0.0370145	1	1	0	0	0	1	0	0	0	0	0
ctrlafb_g1_1.3.0_00044290	chr5	+	122385655	122470758	122385655	122470758	15	122385655,122395299,122398664,122401381,122430515,122430959,122433717,122436867,122438394,122438669,122460822,122463455,122467768,122469368,122470522,	122385665,122395358,122398993,122401505,122430807,122431076,122433916,122437015,122438553,122438751,122461038,122463637,122467863,122469473,122470758,	Lepr	-6.69688	4.58e-12	-2.87968	0.0103339	-5.29605	1	1	0	0	0	1	0	0	0	0	0
ctrlafb_g1_1.3.0_00044298	chr5	+	125434000	125694142	125434000	125694142	14	125434000,125556390,125561736,125624521,125625273,125625881,125627379,125634060,125676880,125677022,125681439,125683737,125690418,125694026,	125434199,125556529,125561834,125624652,125625392,125625919,125627444,125634119,125676930,125677069,125681501,125683845,125690966,125694142,	Dab1	-2.5837	6.06e-07	-1.7494	0.00297206	-2.37279	1	1	0	0	0	1	0	0	0	0	0
ctrlafb_g1_1.3.0_00044347	chr5	+	135462146	135466968	135462146	135466968	5	135462146,135462388,135464217,135465964,135466575,	135462155,135462548,135464325,135466059,135466968,	Pdzk1ip1	3.40369	0.00282246	1.51949	0.0878378	4.91083	0.0475078	1	0	0	0	1	0	0	0	0	0
ctrlafb_g1_1.3.0_00044406	chr5	+	140012776	140046983	140012776	140046983	8	140012776,140025573,140028140,140033786,140036359,140039571,140041649,140046858,	140012940,140025718,140028336,140033955,140036481,140039682,140041794,140046983,	Zmynd12	3.36205	0.000223387	3.31252	0.0446515	7.67661	0.0313049	1	0	0	0	1	0	0	0	0	0
ctrlafb_g1_1.3.0_00044451	chr5	+	145410743	145442146	145410743	145442146	10	145410743,145425174,145428930,145429562,145434632,145435368,145436166,145439131,145440459,145441130,	145410946,145425328,145429097,145429642,145434735,145435496,145436235,145439270,145440522,145442146,	Oscp1	2.29506	0.00117166	2.0317	0.00100624	2.10367	1	1	1	0	0	0	0	0	1	0	0
ctrlafb_g1_1.3.0_00044459	chr5	+	145930764	145965672	145930764	145965672	26	145930764,145932847,145933719,145935733,145938161,145938954,145939912,145940193,145946028,145947521,145948991,145949434,145950183,145950685,145951930,145952659,145955940,145956405,145959022,145959284,145960777,145962380,145963046,145963310,145964370,145964750,	145930936,145932943,145934146,145935879,145938238,145939026,145940020,145940767,145946219,145947747,145949166,145949498,145950379,145950839,145952159,145952770,145956015,145956502,145959186,145959405,145960904,145962482,145963117,145963490,145964519,145965672,	Clspn	3.21794	3.39e-06	2.19414	0.00221239	3.03076	0.450262	1	1	0	0	0	0	0	1	0	0
ctrlafb_g1_1.3.0_00044519	chr5	+	152618307	152622024	152618307	152622024	3	152618307,152618525,152621762,	152618433,152618616,152622024,	Atpif1	2.59917	0.00265398	1.43281	0.0470404	2.49338	3.40143e-05	1	0	1	0	0	0	0	0	1	0
ctrlafb_g1_1.3.0_00044586	chr5	+	158139986	158147514	158139986	158147514	7	158139986,158142713,158143095,158143412,158143746,158146101,158147144,	158140251,158142900,158143199,158143508,158143845,158146230,158147514,	Akr7a3	13.8545	2.7e-36	15.8101	0.000196967	14.8344	0	1	1	1	1	0	0	0	0	0	0
ctrlafb_g1_1.3.0_00044656	chr5	+	168071159	168099500	168071159	168099500	7	168071159,168083839,168084919,168086763,168089153,168090247,168099225,	168071563,168083963,168085023,168086902,168089283,168090381,168099500,	Tnfrsf9	2.4485	0.00171445	2.79241	0.0131234	2.90653	0.14237	1	0	0	0	1	0	0	0	0	0
ctrlafb_g1_1.3.0_00044757	chr5	-	9208982	9218750	9208982	9218750	2	9208982,9218619,	9215805,9218750,	RGD1561849	7.04358	5.17e-36	3.53051	0.00059761	3.71828	1	1	1	0	0	0	0	0	1	0	0
ctrlafb_g1_1.3.0_00044758	chr5	-	9212687	9239091	9212687	9239091	6	9212687,9218619,9221926,9227941,9233018,9238473,	9215805,9218710,9221987,9228103,9233073,9239091,	RGD1561849	9.17225	2.98e-53	3.53051	0.00138013	3.28257	1	1	1	0	0	0	0	0	1	0	0
ctrlafb_g1_1.3.0_00044863	chr5	-	58433731	58447853	58433731	58447853	7	58433731,58434324,58435367,58435737,58436282,58444771,58447612,	58434041,58434541,58435485,58435874,58436405,58444885,58447853,	Aqp7	5.04521	0.00466717	1.97087	0.0626468	0.257933	0.0657358	1	0	0	0	1	0	0	0	0	0
ctrlafb_g1_1.3.0_00044884	chr5	-	59221738	59223682	59221738	59223682	4	59221738,59222069,59222379,59223440,	59221982,59222162,59222511,59223682,	Ccl19	2.07066	0.00477318	2.01917	0.0027972	2.39248	0.111159	1	1	0	0	0	0	0	1	0	0
ctrlafb_g1_1.3.0_00045003	chr5	-	80146349	80152996	80146349	80152996	19	80146349,80146914,80147111,80147701,80147873,80148242,80148476,80148653,80149174,80149372,80150051,80150386,80151078,80151302,80151857,80152023,80152547,80152715,80152874,	80146675,80147032,80147211,80147799,80147957,80148328,80148566,80148755,80149278,80149490,80150207,80150477,80151213,80151436,80151932,80152150,80152625,80152780,80152996,	Kif12	3.34164	2.83e-08	2.03046	0.000197981	-7.07596e-06	1	1	1	0	0	0	0	0	1	0	0
ctrlafb_g1_1.3.0_00045046	chr5	-	111178876	111304980	111178876	111304980	8	111178876,111182245,111188521,111191706,111209689,111239960,111242982,111304495,	111181675,111182283,111188746,111191859,111209792,111240203,111243072,111304980,	Elavl2	4.58742	0.00316085	1.23987	0.0636631	3.13238	0.146207	1	0	0	0	1	0	0	0	0	0
ctrlafb_g1_1.3.0_00045106	chr5	-	131012525	131016992	131012525	131016992	2	131012525,131016567,	131013295,131016992,	Cdkn2c	3.64696	1.31e-07	1.75841	0.0116	3.23692	0.0206707	1	0	0	0	1	0	0	0	0	0
ctrlafb_g1_1.3.0_00045107	chr5	-	131012525	131017679	131012525	131017679	3	131012525,131016567,131017159,	131013295,131016706,131017679,	Cdkn2c	3.6624	7.23e-07	2.1242	0.0135934	4.65479	0.171958	1	0	0	0	1	0	0	0	0	0
ctrlafb_g1_1.3.0_00045112	chr5	-	135546858	135578199	135546858	135578199	12	135546858,135550841,135551070,135552053,135552287,135552566,135553096,135553563,135575223,135575783,135576444,135577997,	135547962,135550917,135551134,135552186,135552477,135552672,135553250,135553687,135575350,135575827,135576585,135578199,	Cyp4a8	-2.68872	4.04e-09	-1.64395	0.0343118	-2.43303	0.0129924	1	0	0	0	1	0	0	0	0	0
ctrlafb_g1_1.3.0_00045272	chr5	-	149279136	149301805	149279136	149301805	10	149279136,149280915,149283822,149284367,149287302,149289638,149290177,149290836,149291627,149301722,	149279682,149281124,149283957,149284457,149287471,149289775,149290256,149291026,149291788,149301805,	Serinc2	12.0669	2.51e-08	6.49103	0.00203293	8.12294	0.00211475	1	1	1	1	0	0	0	0	0	0
ctrlafb_g1_1.3.0_00045322	chr5	-	152972551	152983208	152972551	152983208	21	152972551,152973476,152973743,152973927,152974131,152974690,152974928,152976431,152977032,152977141,152977380,152977529,152977669,152978095,152978255,152978904,152979084,152979544,152980294,152980584,152983130,	152973154,152973657,152973827,152973988,152974204,152974761,152975001,152976603,152977062,152977247,152977453,152977590,152977770,152978157,152978314,152979008,152979125,152979628,152980475,152980741,152983208,	Cnksr1	14.3946	0.000519372	1.41505	0.114315	2.70687	0.304718	1	0	0	0	1	0	0	0	0	0
ctrlafb_g1_1.3.0_00045475	chr5	-	167012688	167023349	167012688	167023349	2	167012688,167022240,	167014646,167023349,	Spsb1	2.62977	0.000243149	1.85248	0.0154977	1.80932	0.684737	1	0	0	0	1	0	0	0	0	0
ctrlafb_g1_1.3.0_00045476	chr5	-	167012696	167025649	167012696	167025649	3	167012696,167022240,167025404,	167014646,167023081,167025649,	Spsb1	2.61899	0.000341043	1.85248	0.0183987	2.7511	0.00281758	1	0	1	0	0	0	0	0	1	0
ctrlafb_g1_1.3.0_00045488	chr5	-	168151808	168187606	168151808	168187606	21	168151808,168155286,168156060,168157197,168158596,168159916,168163709,168164033,168164660,168168800,168169507,168170580,168174081,168174469,168177042,168178974,168181499,168184487,168185841,168186778,168187318,	168152932,168155436,168156243,168157299,168159287,168160143,168163876,168164148,168164792,168168929,168169635,168170685,168174237,168174575,168177120,168179116,168181547,168184688,168185956,168186923,168187606,	Per3	2.1234	0.00353646	1.25697	0.409777	-0.0715942	0.175345	1	0	0	0	1	0	0	0	0	0
ctrlafb_g1_1.3.0_00045535	chr5	-	172879073	172893840	172879073	172893840	13	172879073,172880686,172881097,172886528,172887183,172888270,172888897,172890293,172890497,172890966,172891184,172893575,172893741,	172880401,172880779,172881213,172886668,172887354,172888441,172888982,172890419,172890615,172891098,172891264,172893637,172893840,	Ttll10	4.55689	0.0032068	-1.00884	0.2726	5.21656	0.0847921	1	0	0	0	1	0	0	0	0	0
ctrlafb_g1_1.3.0_00045550	chr5	+	9148512	9172193	9148512	9172193	13	9148512,9150967,9152683,9155240,9156517,9159953,9161282,9165197,9165737,9166914,9167255,9167786,9169635,	9148637,9151187,9152851,9155311,9156621,9160186,9161650,9165339,9165851,9167030,9167359,9167965,9172193,	Mybl1	6.38973	4.82e-12	3.89226	0.00159744	0	1	1	1	0	0	0	0	0	1	0	0
ctrlafb_g1_1.3.0_00045551	chr5	+	9155152	9172193	9155152	9172193	10	9155152,9156517,9159953,9161282,9165197,9165737,9166914,9167255,9167786,9169635,	9155311,9156621,9160186,9161650,9165339,9165851,9167030,9167359,9167965,9172193,	Mybl1	6.32214	1.96e-11	3.89226	0.000997009	3.84324	1	1	1	0	0	0	0	0	1	0	0
ctrlafb_g1_1.3.0_00045642	chr5	+	122385369	122501380	122385369	122501380	16	122385369,122395299,122398664,122401381,122430515,122430959,122433717,122436867,122438394,122438669,122460822,122463455,122467768,122469368,122470522,122500195,	122385665,122395358,122398993,122401505,122430807,122431076,122433916,122437015,122438553,122438751,122461038,122463637,122467863,122469473,122470597,122501380,	Lepr	-6.60762	5.95e-13	-2.34303	0.0548027	-6.3145	1	1	0	0	0	1	0	0	0	0	0
ctrlafb_g1_1.3.0_00045647	chr5	+	125434000	125706959	125434000	125706959	15	125434000,125434094,125556390,125561736,125624521,125625273,125625881,125627379,125634060,125681439,125683737,125690418,125694026,125694467,125703658,	125434025,125434199,125556529,125561834,125624652,125625392,125625919,125627444,125634119,125681501,125683845,125690966,125694153,125694577,125706959,	Dab1	-2.2397	8.2e-05	-2.46932	0.0020004	213.612	1	1	1	0	0	0	0	0	1	0	0
ctrlafb_g1_1.3.0_00045648	chr5	+	125434000	125706959	125434000	125706959	14	125434000,125434094,125556395,125561736,125624521,125625273,125634060,125676880,125677022,125681439,125683737,125690418,125694026,125703658,	125434025,125434204,125556529,125561834,125624652,125625392,125634119,125676930,125677069,125681501,125683845,125690966,125694153,125706959,	Dab1	-2.23722	8.29e-05	-2.46932	0.00258398	-3.40776	1	1	1	0	0	0	0	0	1	0	0
ctrlafb_g1_1.3.0_00046091	chr5	+	122315441	122501762	122315441	122501762	17	122315441,122320053,122395299,122398664,122401381,122430515,122430959,122433717,122436867,122438394,122438669,122460822,122463455,122467768,122469368,122470522,122500195,	122315544,122320128,122395358,122398993,122401505,122430807,122431076,122433916,122437015,122438553,122438751,122461038,122463637,122467863,122469473,122470597,122501762,	Lepr	-4.45199	3.7e-10	-2.34303	0.0541299	-9.67154	1	1	0	0	0	1	0	0	0	0	0
ctrlafb_g1_1.3.0_00046092	chr5	+	125434028	125706982	125434028	125706982	14	125434028,125556390,125561736,125624521,125625273,125634060,125676880,125677022,125681439,125683737,125690418,125694026,125694467,125703658,	125434199,125556529,125561834,125624652,125625392,125634119,125676930,125677069,125681501,125683845,125690966,125694153,125694577,125706982,	Dab1	-2.2521	6.41e-05	-2.46932	0.00421602	-5.29182	1	1	1	0	0	0	0	0	1	0	0
ctrlafb_g1_1.3.0_00046093	chr5	+	125434028	125706982	125434028	125706982	13	125434028,125556390,125561736,125624521,125625273,125625881,125627379,125634060,125681439,125683737,125690418,125694026,125703658,	125434199,125556529,125561834,125624652,125625392,125625919,125627444,125634119,125681501,125683845,125690966,125694153,125706982,	Dab1	-2.24101	8.86e-05	-2.46932	0.0023933	1.02177	1	1	1	0	0	0	0	0	1	0	0
ctrlafb_g1_1.3.0_00046349	chr5	-	158147624	158150608	158147624	158150608	4	158147624,158149610,158150003,158150397,	158149497,158149686,158150154,158150608,	Mrto4	3.9874	3.57e-09	1.07979	0.331418	-2.68025	0.343892	1	0	0	0	1	0	0	0	0	0
ctrlafb_g1_1.3.0_00046405	chr5	+	9145444	9172094	9145444	9172094	15	9145444,9145912,9148545,9150967,9152683,9155240,9156517,9159953,9161282,9165197,9165737,9166914,9167255,9167786,9169635,	9145606,9145983,9148637,9151187,9152857,9155311,9156621,9160186,9161650,9165339,9165851,9167030,9167359,9167965,9172094,	Mybl1	6.37174	2.99e-12	3.89226	0.00238663	-0.173532	1	1	1	0	0	0	0	0	1	0	0
ctrlafb_g1_1.3.0_00046406	chr5	+	9156492	9172094	9156492	9172094	9	9156492,9159953,9161282,9165197,9165737,9166914,9167255,9167786,9169635,	9156621,9160186,9161650,9165339,9165851,9167030,9167359,9167965,9172094,	Mybl1	6.24487	4.95e-11	3.89226	0.0014093	1166.59	1	1	1	0	0	0	0	0	1	0	0
ctrlafb_g1_1.3.0_00046705	chr5	-	158147143	158150200	158147143	158150200	3	158147143,158149610,158150003,	158149497,158149686,158150200,	Mrto4	10.103	1.09e-19	4.13177	0.00019581	7.87979	1.09579e-12	1	1	1	1	0	0	0	0	0	0
ctrlafb_g1_1.3.0_00046745	chr5	+	9136980	9172224	9136980	9172224	16	9136980,9145501,9145912,9148545,9150967,9152683,9155240,9156517,9159953,9161282,9165197,9165737,9166914,9167255,9167848,9169635,	9137356,9145606,9145983,9148637,9151187,9152851,9155311,9156621,9160186,9161650,9165339,9165851,9167030,9167359,9167965,9172224,	Mybl1	6.37022	5.27e-12	3.89226	0.00203998	1.297	1	1	1	0	0	0	0	0	1	0	0
ctrlafb_g1_1.3.0_00046746	chr5	+	9138973	9172224	9138973	9172224	16	9138973,9145501,9145912,9148545,9150967,9152683,9155240,9156517,9159953,9161282,9165197,9165737,9166914,9167255,9167786,9169635,	9139013,9145606,9145983,9148637,9151187,9152857,9155311,9156621,9160186,9161650,9165339,9165851,9167030,9167359,9167965,9172224,	Mybl1	6.47369	2.03e-12	3.89226	0.00158103	1.22949	1	1	1	0	0	0	0	0	1	0	0
ctrlafb_g1_1.3.0_00046747	chr5	+	9155172	9172224	9155172	9172224	9	9155172,9159953,9161282,9165197,9165737,9166914,9167255,9167786,9169635,	9155311,9160186,9161650,9165339,9165851,9167030,9167359,9167965,9172224,	Mybl1	6.3462	3.3e-11	3.89226	0.00298924	0.470935	1	1	1	0	0	0	0	0	1	0	0
ctrlafb_g1_1.3.0_00046768	chr5	+	60787123	60848620	60787123	60848620	18	60787123,60791419,60793255,60795530,60797548,60798987,60801209,60807617,60814502,60815907,60822948,60830462,60835343,60837052,60840542,60841774,60844798,60847662,	60787209,60791514,60793340,60795646,60797691,60799055,60801301,60807715,60814570,60816005,60823034,60830581,60835453,60837283,60840638,60841942,60844901,60848620,	Melk	4.07955	2.01e-05	4.65696	0.00263531	3.17402	1	1	1	0	0	0	0	0	1	0	0
ctrlafb_g1_1.3.0_00046814	chr5	+	125434024	125706983	125434024	125706983	16	125434024,125556390,125561736,125624521,125625273,125625881,125627379,125634060,125676880,125677022,125681439,125683737,125690418,125694026,125694467,125703658,	125434199,125556529,125561834,125624652,125625392,125625919,125627444,125634119,125676930,125677069,125681501,125683845,125690966,125694153,125694577,125706983,	Dab1	-2.2521	6.41e-05	-2.46932	0.00327802	0.337513	1	1	1	0	0	0	0	0	1	0	0
ctrlafb_g1_1.3.0_00046815	chr5	+	125681422	125706983	125681422	125706983	5	125681422,125683737,125690418,125694026,125703658,	125681501,125683845,125690966,125694153,125706983,	Dab1	-2.14404	0.000392036	-3.48552	0.00622365	0.35345	1	1	0	0	0	1	0	0	0	0	0
ctrlafb_g1_1.3.0_00046847	chr5	+	145410751	145439279	145410751	145439279	8	145410751,145425174,145428930,145429562,145434632,145435368,145436166,145439131,	145410946,145425328,145429097,145429642,145434735,145435496,145436235,145439279,	Oscp1	2.73739	0.00207633	2.0317	0.000791139	3.59544	1	1	1	0	0	0	0	0	1	0	0
ctrlafb_g1_1.3.0_00046849	chr5	+	145930764	145964575	145930764	145964575	25	145930764,145932847,145933719,145935733,145938161,145938954,145939912,145940193,145946028,145947521,145948991,145949434,145950183,145950685,145951930,145952659,145955940,145956405,145959022,145959284,145960777,145962380,145963046,145963329,145964370,	145930936,145932943,145934146,145935894,145938238,145939026,145940020,145940767,145946219,145947747,145949166,145949498,145950379,145950839,145952159,145952770,145956015,145956502,145959186,145959405,145960904,145962482,145963128,145963490,145964575,	Clspn	2.89752	0.000199837	1.86585	0.00977459	1.40041	0.810645	1	0	0	0	1	0	0	0	0	0
ctrlafb_g1_1.3.0_00046869	chr5	+	156075681	156083198	156075681	156083198	4	156075681,156081707,156081926,156082581,	156075998,156081838,156082068,156083198,	Wnt4	2.43778	0.000637131	1.50233	0.0331361	108.784	0.646078	1	0	0	0	1	0	0	0	0	0
ctrlafb_g1_1.3.0_00046952	chr5	-	80146349	80152388	80146349	80152388	16	80146349,80146914,80147111,80147701,80147873,80148242,80148476,80148653,80149174,80149372,80150051,80150386,80151078,80151302,80151857,80152023,	80146675,80147032,80147214,80147799,80147957,80148328,80148566,80148755,80149278,80149490,80150207,80150477,80151213,80151436,80151932,80152388,	Kif12	3.14475	2.86e-07	2.03046	0.000204457	0	1	1	1	0	0	0	0	0	1	0	0
ctrlafb_g1_1.3.0_00046953	chr5	-	80146349	80153021	80146349	80153021	19	80146349,80146914,80147111,80147701,80147873,80148242,80148476,80148653,80149174,80149372,80150051,80150386,80151078,80151302,80151857,80152023,80152547,80152715,80152874,	80146675,80147032,80147214,80147799,80147957,80148328,80148566,80148755,80149278,80149490,80150207,80150477,80151213,80151436,80151932,80152150,80152625,80152780,80153021,	Kif12	3.34164	2.83e-08	2.03046	0.000397298	2.90283	1	1	1	0	0	0	0	0	1	0	0
ctrlafb_g1_1.3.0_00047094	chr5	+	9136945	9172229	9136945	9172229	16	9136945,9145501,9145912,9148545,9150967,9152683,9155240,9156517,9159953,9161282,9165197,9165737,9166914,9167255,9167786,9169635,	9137356,9145606,9145983,9148637,9151187,9152857,9155311,9156621,9160186,9161650,9165339,9165851,9167030,9167359,9167965,9172229,	Mybl1	6.35001	2.63e-12	3.89226	0.00275916	0.300053	1	1	1	0	0	0	0	0	1	0	0
ctrlafb_g1_1.3.0_00047115	chr5	+	60807580	60848620	60807580	60848620	11	60807580,60814502,60815907,60822948,60830462,60835343,60837052,60840542,60841774,60844798,60847662,	60807715,60814570,60816005,60823034,60830585,60835453,60837283,60840638,60841942,60844901,60848620,	Melk	4.38315	2.47e-05	4.65696	0.00344897	92.8583	1	1	1	0	0	0	0	0	1	0	0
ctrlafb_g1_1.3.0_00047175	chr5	+	145930764	145965672	145930764	145965672	25	145930764,145932847,145933719,145935733,145938161,145938954,145939912,145940193,145946028,145947521,145948991,145949434,145950183,145950685,145951930,145952659,145955940,145956405,145959022,145959284,145960777,145962380,145963046,145963310,145964370,	145930936,145932943,145934146,145935879,145938238,145939026,145940020,145940767,145946219,145947747,145949166,145949498,145950379,145950839,145952159,145952770,145956015,145956502,145959186,145959405,145960904,145962482,145963117,145963490,145965672,	Clspn	3.33176	1.21e-06	2.19414	0.00284437	5.36275	0.130074	1	1	0	0	0	0	0	1	0	0
ctrlafb_g1_1.3.0_00047238	chr5	-	9213392	9219572	9213392	9219572	3	9213392,9218619,9219285,	9215805,9218710,9219572,	RGD1561849	10.2441	7.37e-69	3.53051	0.00140704	17.8466	1	1	1	0	0	0	0	0	1	0	0
ctrlafb_g1_1.3.0_00047268	chr5	-	80146349	80152996	80146349	80152996	19	80146349,80146914,80147111,80147701,80147873,80148242,80148476,80148653,80149167,80149372,80150051,80150386,80151078,80151302,80151857,80152023,80152547,80152715,80152874,	80146675,80147032,80147211,80147799,80147957,80148328,80148566,80148755,80149278,80149490,80150207,80150477,80151213,80151436,80151932,80152150,80152625,80152780,80152996,	Kif12	3.34164	2.83e-08	2.03046	0.000196541	0	1	1	1	0	0	0	0	0	1	0	0
ctrlafb_g1_1.3.0_00047549	chr5	-	80146883	80153023	80146883	80153023	16	80146883,80147111,80147701,80147873,80148242,80148476,80148653,80149174,80149372,80150051,80150386,80151078,80151302,80151857,80152023,80152874,	80147032,80147211,80147799,80147957,80148328,80148566,80148755,80149278,80149490,80150207,80150477,80151213,80151436,80151932,80152780,80153023,	Kif12	3.30046	4.98e-08	2.03046	0.000201126	4.73452	1	1	1	0	0	0	0	0	1	0	0
ctrlafb_g1_1.3.0_00047946	chr6	+	7993577	8025670	7993577	8025670	12	7993577,7995336,7999870,8001839,8006010,8011178,8012145,8012760,8015942,8018777,8018957,8025389,	7993666,7995453,7999904,8001908,8006098,8011364,8012213,8012837,8016384,8018874,8019049,8025670,	Dync2li1	4.73375	0.000733588	2.2034	0.019996	0	1	1	0	0	0	1	0	0	0	0	0
ctrlafb_g1_1.3.0_00047947	chr6	+	8064631	8083271	8064631	8083271	11	8064631,8068151,8070041,8073452,8076194,8076438,8077754,8078118,8078747,8080219,8080434,	8064803,8068252,8070197,8073692,8076357,8076518,8077953,8078194,8079014,8080346,8083271,	Abcg8	2.91962	1.17e-05	2.3167	0.0351406	3.40985	1	1	0	0	0	1	0	0	0	0	0
ctrlafb_g1_1.3.0_00047961	chr6	+	11176664	11192628	11176664	11192628	9	11176664,11180094,11180449,11181791,11182581,11184110,11186592,11190557,11192142,	11176806,11180201,11180689,11181856,11182644,11184211,11186795,11190601,11192628,	Epcam	2.09451	4.04e-05	1.4875	0.00750099	2.11088	0.00510726	1	0	0	0	1	0	0	0	0	0
ctrlafb_g1_1.3.0_00048005	chr6	+	25414812	25426818	25414812	25426818	6	25414812,25423483,25425164,25425323,25425675,25425968,	25414932,25423585,25425229,25425393,25425796,25426818,	Cgref1	2.12772	0.000240142	1.9246	0.00702811	2.23879	0.0748426	1	0	0	0	1	0	0	0	0	0
ctrlafb_g1_1.3.0_00048008	chr6	+	26120168	26130428	26120168	26130428	12	26120168,26120779,26121301,26121950,26123804,26124682,26124977,26125722,26126712,26128626,26129067,26130297,	26120419,26120919,26121477,26122168,26124013,26124825,26125173,26125901,26128085,26128688,26129122,26130428,	Gpr113	2.60736	0.000875725	2.0869	0.0146	0.0601444	0.215427	1	0	0	0	1	0	0	0	0	0
ctrlafb_g1_1.3.0_00048017	chr6	+	26931969	26937789	26931969	26937789	3	26931969,26935209,26937105,	26932064,26935359,26937789,	Pomc	2.07291	0.00294434	-1.29517	0.149709	1.86221	0.200918	1	0	0	0	1	0	0	0	0	0
ctrlafb_g1_1.3.0_00048041	chr6	+	35830471	35942157	35830471	35942157	12	35830471,35872805,35906899,35922607,35923839,35926087,35926687,35926920,35927129,35929261,35933721,35936318,	35830535,35872946,35906978,35922728,35923944,35926223,35926764,35927036,35927208,35929387,35933791,35942157,	Fam49a	2.4715	8.37e-15	3.22096	0.000807591	2.40923	1	1	1	0	0	0	0	0	1	0	0
ctrlafb_g1_1.3.0_00048119	chr6	+	63717460	64015522	63717460	64015522	33	63717460,63777745,63859193,63940023,63942303,63944466,63946607,63947840,63958198,63958843,63960654,63962928,63964323,63971509,63974135,63975608,63975871,63977664,63978212,63979951,63982442,63982737,63983921,63984620,63986250,63988273,63988984,63990475,63996888,63998063,64003219,64004841,64012122,	63717631,63777888,63859249,63940224,63942320,63944571,63946803,63947962,63958368,63958899,63960765,63963112,63964454,63971652,63974246,63975774,63976018,63977788,63978241,63980052,63982639,63982807,63984146,63984735,63986454,63988395,63989160,63990510,63997013,63998215,64003350,64004919,64015522,	Nrcam	17.0639	4.5e-28	4.93373	0.00120072	0	1	1	1	0	0	0	0	0	1	0	0
ctrlafb_g1_1.3.0_00048120	chr6	+	63943542	64015522	63943542	64015522	28	63943542,63944466,63946607,63947840,63958198,63960654,63962928,63964323,63971509,63974135,63975608,63975871,63977664,63978212,63979951,63982442,63982737,63983921,63984620,63986250,63988273,63988984,63990475,63996888,63998063,64003219,64004841,64012122,	63943586,63944571,63946803,63947962,63958368,63960765,63963112,63964454,63971652,63974246,63975774,63976018,63977788,63978241,63980052,63982639,63982807,63984146,63984735,63986454,63988395,63989160,63990510,63997013,63998215,64003350,64004919,64015522,	Nrcam	16.7548	2.75e-29	4.93373	0.00141414	0	1	1	1	0	0	0	0	0	1	0	0
ctrlafb_g1_1.3.0_00048219	chr6	+	98923115	98932759	98923115	98932759	2	98923115,98926084,	98923382,98932759,	Akap5	3.17559	1.53e-05	2.36455	0.0508134	3.35243	0.000149394	1	0	1	0	0	0	0	0	1	0
ctrlafb_g1_1.3.0_00048255	chr6	+	105495936	105530999	105495936	105530999	3	105495936,105526866,105529554,	105496415,105527048,105530999,	Ttc9	5.5823	0.00433784	2.34859	0.0160243	5.4776	0.172734	1	0	0	0	1	0	0	0	0	0
ctrlafb_g1_1.3.0_00048501	chr6	-	8027647	8046518	8027647	8046518	11	8027647,8030145,8035198,8038197,8039246,8039555,8040433,8041464,8042920,8045393,8045577,	8028287,8030257,8035383,8038335,8039451,8039768,8040562,8041603,8043052,8045491,8046518,	Abcg5	2.69396	4.77e-11	3.26391	0.00456893	1.27114	0.794289	1	1	0	0	0	0	0	1	0	0
ctrlafb_g1_1.3.0_00048502	chr6	-	8027647	8064425	8027647	8064425	13	8027647,8030145,8035198,8038197,8039246,8039555,8040433,8041464,8042920,8045393,8045577,8063482,8064216,	8028287,8030257,8035383,8038335,8039451,8039768,8040562,8041603,8043052,8045491,8045713,8063603,8064425,	Abcg5	2.68576	6.79e-10	3.26391	0.00414446	2.99581	6.86752e-05	1	1	1	1	0	0	0	0	0	0
ctrlafb_g1_1.3.0_00048560	chr6	-	25218008	25237575	25218008	25237575	9	25218008,25218427,25218629,25218869,25219653,25221869,25223697,25224740,25237224,	25218150,25218519,25218753,25218898,25219740,25221964,25223868,25224912,25237575,	Trim54	91.7023	2.25e-21	5.51327	0.00216791	3.46584	0.000434109	1	1	1	1	0	0	0	0	0	0
ctrlafb_g1_1.3.0_00048610	chr6	-	40676401	40681103	40676401	40681103	3	40676401,40679723,40680943,	40677777,40679764,40681103,	Pqlc3	2.89881	2.49e-06	1.70511	0.000805964	-1.02189	0.987774	1	0	0	0	1	0	0	0	0	0
ctrlafb_g1_1.3.0_00048611	chr6	-	40676562	40688138	40676562	40688138	7	40676562,40679723,40680943,40683372,40685387,40685528,40687825,	40677777,40679764,40681063,40683429,40685456,40685610,40688138,	Pqlc3	3.42082	2.77e-08	1.70511	0.00079984	6.57072	0.0360344	1	0	0	0	1	0	0	0	0	0
ctrlafb_g1_1.3.0_00048679	chr6	-	74451038	74476506	74451038	74476506	5	74451038,74453649,74455710,74456640,74475616,	74452632,74453722,74455846,74456759,74476506,	Egln3	3.48667	0.00191741	1.08098	0.749799	4.05491	1	1	0	0	0	1	0	0	0	0	0
ctrlafb_g1_1.3.0_00048769	chr6	-	99372418	99376230	99372418	99376230	2	99372418,99375888,	99373084,99376230,	Gpx2	22.4142	1.09e-26	3.69138	0.00157604	27.9786	2.83324e-11	1	1	1	1	0	0	0	0	0	0
ctrlafb_g1_1.3.0_00048774	chr6	-	101479417	101494826	101479417	101494826	9	101479417,101481491,101482630,101483153,101484519,101485156,101486634,101490847,101494710,	101480033,101481569,101482696,101483256,101484563,101485223,101486713,101490964,101494826,	Atp6v1d	4.09781	1.04e-31	2.7935	0.000405351	4.4352	2.394e-11	1	1	1	1	0	0	0	0	0	0
ctrlafb_g1_1.3.0_00048775	chr6	-	101479564	101485682	101479564	101485682	7	101479564,101481491,101482630,101483153,101484519,101485156,101485631,	101480033,101481569,101482696,101483256,101484563,101485223,101485682,	Atp6v1d	4.14059	2.59e-33	1.96134	0.0276516	3.11141	0.0254688	1	0	0	0	1	0	0	0	0	0
ctrlafb_g1_1.3.0_00048821	chr6	-	108826446	108924746	108826446	108924746	36	108826446,108827966,108828423,108828447,108828939,108829200,108829563,108830702,108831213,108832429,108833115,108838756,108839322,108839549,108840698,108841395,108841742,108842839,108846775,108851439,108852195,108854105,108854973,108856202,108856597,108857037,108859271,108861870,108878517,108879219,108880196,108880811,108881870,108902212,108917648,108924156,	108827617,108828115,108828436,108828704,108829106,108829337,108829691,108830785,108831404,108832572,108833240,108838878,108839447,108839671,108840823,108841520,108841864,108842958,108846894,108851567,108852323,108854218,108855012,108856221,108856812,108857201,108859393,108861944,108878619,108879502,108880402,108880981,108882051,108902464,108917718,108924746,	Ltbp2	4.19941	1.02e-08	2.10252	0.0183135	0	1	1	0	0	0	1	0	0	0	0	0
ctrlafb_g1_1.3.0_00048911	chr6	-	127932446	127939824	127932446	127939824	5	127932446,127933797,127936098,127938526,127939588,	127932732,127933947,127936368,127939151,127939824,	LOC299271	10.6542	0.00262345	1.09328	0.504225	0.168092	0.0975506	1	0	0	0	1	0	0	0	0	0
ctrlafb_g1_1.3.0_00048951	chr6	-	135531656	135562497	135531656	135562497	12	135531656,135532064,135533711,135534392,135535530,135537258,135538445,135538606,135547044,135548637,135553819,135562338,	135531981,135532261,135533825,135534528,135535631,135537436,135538493,135538684,135547114,135548726,135553933,135562497,	Rage	8.03704	4.26e-28	1.03849	0.86338	9.84152	1	1	0	0	0	1	0	0	0	0	0
ctrlafb_g1_1.3.0_00048977	chr6	-	138346473	138347453	138346473	138347453	3	138346473,138346995,138347429,	138346878,138347315,138347453,	Not RefSeq	2.65858	2.37e-05	2.10955	0.0325059	2.35551	1	1	0	0	0	1	0	0	0	0	0
ctrlafb_g1_1.3.0_00048990	chr6	+	8064626	8082089	8064626	8082089	11	8064626,8068151,8070041,8073488,8076194,8076438,8077754,8078118,8078747,8080219,8080434,	8064803,8068252,8070197,8073692,8076357,8076518,8077953,8078194,8079014,8080346,8082089,	Abcg8	2.87033	2.37e-05	4.1226	0.0221826	-1.28663	1	1	0	0	0	1	0	0	0	0	0
ctrlafb_g1_1.3.0_00049015	chr6	+	35830484	35940370	35830484	35940370	11	35830484,35906899,35922607,35923839,35926087,35926687,35926920,35927129,35929270,35933721,35936318,	35830535,35906978,35922728,35923944,35926223,35926764,35927036,35927208,35929387,35933791,35940370,	Fam49a	2.4932	5.29e-15	3.22096	0.000201288	1.37627	1	1	1	0	0	0	0	0	1	0	0
ctrlafb_g1_1.3.0_00049046	chr6	+	63943528	64004965	63943528	64004965	28	63943528,63944466,63946607,63947840,63958198,63958843,63960654,63962928,63964323,63971509,63974135,63975608,63975871,63977664,63978212,63979951,63982442,63982737,63983921,63984620,63986250,63988273,63988984,63990475,63996888,63998063,64003219,64004841,	63943586,63944571,63946803,63947962,63958368,63958899,63960765,63963112,63964454,63971652,63974246,63975774,63976018,63977788,63978241,63980052,63982639,63982807,63984146,63984735,63986454,63988395,63989160,63990510,63997013,63998215,64003350,64004965,	Nrcam	16.6215	3e-34	10.6957	0.000397614	-0.040166	0.236755	1	1	0	0	0	0	0	1	0	0
ctrlafb_g1_1.3.0_00049047	chr6	+	63943638	64015522	63943638	64015522	28	63943638,63944466,63946607,63947840,63958198,63958843,63960654,63962928,63964323,63971509,63974135,63975608,63975871,63977664,63979951,63982442,63982737,63983921,63984620,63986250,63988273,63988984,63990475,63996888,63998063,64003219,64004841,64012122,	63943662,63944571,63946803,63947962,63958368,63958899,63960765,63963112,63964454,63971652,63974246,63975774,63976018,63977788,63980052,63982639,63982807,63984146,63984735,63986454,63988395,63989160,63990510,63997013,63998215,64003350,64004919,64015522,	Nrcam	16.6526	2.28e-28	4.93373	0.0010014	6.75132	1	1	1	0	0	0	0	0	1	0	0
ctrlafb_g1_1.3.0_00049352	chr6	+	63717460	64015522	63717460	64015522	30	63717460,63777745,63859193,63940023,63942303,63944466,63946607,63947840,63958198,63958843,63960654,63962928,63964323,63971509,63974135,63975608,63975871,63977664,63978212,63979951,63982442,63982737,63983921,63984620,63986250,63988273,63988984,64003219,64004841,64012122,	63717631,63777888,63859249,63940224,63942320,63944571,63946803,63947962,63958368,63958899,63960765,63963112,63964454,63971652,63974246,63975774,63976018,63977788,63978241,63980052,63982639,63982807,63984146,63984735,63986454,63988395,63989160,64003350,64004919,64015522,	Nrcam	17.0303	3.36e-28	4.93373	0.00060036	0	1	1	1	0	0	0	0	0	1	0	0
ctrlafb_g1_1.3.0_00049353	chr6	+	63717460	64024873	63717460	64024873	34	63717460,63777745,63859193,63940023,63942303,63944466,63946607,63947840,63958198,63958843,63960654,63962928,63964323,63971509,63974135,63975608,63975871,63977664,63978212,63979951,63982442,63982737,63983921,63984620,63986250,63988273,63988984,63990475,63996888,63998063,64003219,64004841,64012122,64024841,	63717631,63777888,63859249,63940224,63942320,63944571,63946803,63947962,63958368,63958899,63960765,63963112,63964454,63971652,63974246,63975774,63976018,63977788,63978241,63980052,63982639,63982807,63984146,63984735,63986454,63988395,63989160,63990510,63997013,63998215,64003350,64004919,64012276,64024873,	Nrcam	17.5278	1.85e-28	13.1497	0.000394555	-0.00602529	0.385847	1	1	0	0	0	0	0	1	0	0
ctrlafb_g1_1.3.0_00049611	chr6	+	63943550	64015897	63943550	64015897	29	63943550,63944466,63946607,63947840,63958198,63958843,63960654,63962928,63964323,63971509,63974135,63975608,63975871,63977664,63978212,63979951,63982442,63982737,63983921,63984620,63986250,63988273,63988984,63990475,63996888,63998063,64003219,64004841,64012122,	63943586,63944571,63946803,63947962,63958368,63958899,63960765,63963112,63964454,63971652,63974246,63975774,63976018,63977788,63978241,63980052,63982639,63982807,63984146,63984735,63986454,63988395,63989160,63990510,63997013,63998215,64003350,64004919,64015897,	Nrcam	16.4791	1.22e-29	4.93373	0.00161323	0	1	1	1	0	0	0	0	0	1	0	0
ctrlafb_g1_1.3.0_00049845	chr6	+	35830497	35939897	35830497	35939897	13	35830497,35836285,35872805,35906899,35922607,35923839,35926087,35926687,35926920,35927129,35929261,35933721,35936318,	35830535,35836418,35872946,35906978,35922728,35923944,35926223,35926764,35927036,35927208,35929387,35933791,35939897,	Fam49a	2.48746	6.24e-15	3.22096	0.000789889	2.20636	1	1	1	0	0	0	0	0	1	0	0
ctrlafb_g1_1.3.0_00049871	chr6	+	63717460	64015733	63717460	64015733	30	63717460,63777745,63859193,63940023,63942303,63944466,63946607,63947840,63958198,63958843,63960654,63962928,63964323,63971509,63974135,63975608,63975871,63977664,63979951,63982442,63982737,63983921,63984620,63986250,63988273,63988984,64003219,64004841,64011510,64012122,	63717631,63777888,63859249,63940224,63942320,63944571,63946803,63947962,63958368,63958899,63960765,63963112,63964454,63971652,63974246,63975774,63976018,63977788,63980052,63982639,63982807,63984146,63984735,63986454,63988395,63989160,64003350,64004919,64011566,64015733,	Nrcam	16.839	2.33e-29	4.93373	0.00221061	0	1	1	1	0	0	0	0	0	1	0	0
ctrlafb_g1_1.3.0_00049872	chr6	+	63943370	64015733	63943370	64015733	29	63943370,63944466,63946607,63947840,63958198,63960654,63962928,63964323,63971509,63974135,63975608,63975871,63977664,63978212,63979951,63982442,63982737,63983921,63984620,63986250,63988273,63988984,63990475,63996888,63998063,64003219,64004841,64011510,64012122,	63943586,63944571,63946803,63947962,63958368,63960765,63963112,63964454,63971652,63974246,63975774,63976018,63977788,63978241,63980052,63982639,63982807,63984146,63984735,63986454,63988395,63989160,63990510,63997013,63998215,64003350,64004919,64011566,64015733,	Nrcam	16.6276	1.42e-30	4.93373	0.00160385	1.49091	6.17207e-05	1	1	0	0	0	0	0	1	0	0
ctrlafb_g1_1.3.0_00049873	chr6	+	63943557	64015733	63943557	64015733	25	63943557,63944466,63946607,63947840,63958198,63958843,63960654,63962928,63964323,63971509,63974135,63975608,63975871,63977664,63979951,63982442,63982737,63983921,63984620,63986250,63988273,63988984,64003219,64004841,64012122,	63943586,63944571,63946803,63947962,63958368,63958899,63960765,63963112,63964454,63971652,63974246,63975774,63976018,63977788,63980052,63982639,63982807,63984146,63984735,63986454,63988395,63989169,64003350,64004919,64015733,	Nrcam	16.514	4.35e-30	4.93373	0.00139359	7.6965	0.0392891	1	1	0	0	0	0	0	1	0	0
ctrlafb_g1_1.3.0_00050002	chr6	-	25686546	25693940	25686546	25693940	5	25686546,25688046,25688449,25688922,25693665,	25687392,25688200,25688526,25689028,25693940,	Cenpa	2.30378	0.0039002	1.84691	0.0923169	5.87315	1	1	0	0	0	1	0	0	0	0	0
ctrlafb_g1_1.3.0_00050043	chr6	-	101482515	101494941	101482515	101494941	7	101482515,101483153,101484519,101485156,101486634,101490847,101494710,	101482696,101483256,101484563,101485223,101486713,101490964,101494941,	Atp6v1d	3.90327	2.85e-29	3.97873	0.000203376	3.83602	4.13665e-05	1	1	1	1	0	0	0	0	0	0
ctrlafb_g1_1.3.0_00050079	chr6	-	135531656	135553980	135531656	135553980	9	135531656,135534392,135535530,135537258,135538445,135538606,135547044,135548637,135553819,	135533825,135534528,135535631,135537436,135538493,135538684,135547114,135548726,135553980,	Rage	8.52801	3.14e-20	1.03849	0.857566	9.38514	0.00324328	1	0	1	0	0	0	0	0	1	0
ctrlafb_g1_1.3.0_00050080	chr6	-	135531656	135562497	135531656	135562497	11	135531656,135532064,135533711,135534392,135535530,135537258,135538445,135547044,135548637,135553819,135562338,	135531981,135532261,135533825,135534528,135535631,135537436,135538684,135547114,135548726,135553933,135562497,	Rage	8.10106	1.03e-28	1.03849	0.868431	9.78218	1	1	0	0	0	1	0	0	0	0	0
ctrlafb_g1_1.3.0_00050095	chr6	+	7993577	8025670	7993577	8025670	13	7993577,7995336,7999870,8001839,8006010,8011178,8012145,8012760,8015942,8016314,8018777,8018957,8025389,	7993666,7995453,7999904,8001908,8006098,8011364,8012213,8012837,8016018,8016384,8018874,8019049,8025670,	Dync2li1	4.96525	0.00090821	2.2034	0.0200317	3.39251	0.0979287	1	0	0	0	1	0	0	0	0	0
ctrlafb_g1_1.3.0_00050104	chr6	+	26120168	26130577	26120168	26130577	11	26120168,26121301,26121950,26123804,26124682,26124977,26125722,26126712,26128626,26129067,26130297,	26120419,26121477,26122168,26124013,26124825,26125173,26125901,26128085,26128688,26129122,26130577,	Gpr113	2.69525	0.00075417	2.0869	0.0115308	2.18458	0.559337	1	0	0	0	1	0	0	0	0	0
ctrlafb_g1_1.3.0_00050136	chr6	+	63943530	64012175	63943530	64012175	28	63943530,63944466,63946607,63947840,63958198,63960654,63962928,63964323,63971509,63974135,63975608,63975871,63977664,63979951,63982442,63982737,63983921,63984620,63986250,63988273,63988984,63990475,63996888,63998063,64003219,64004841,64011510,64012122,	63943586,63944571,63946803,63947962,63958368,63960765,63963112,63964454,63971652,63974246,63975774,63976018,63977788,63980052,63982639,63982807,63984146,63984735,63986454,63988395,63989160,63990510,63997013,63998215,64003350,64004919,64011566,64012175,	Nrcam	17.1713	1.62e-34	13.1497	0.000199322	13.4899	0.0408769	1	1	0	0	0	0	0	1	0	0
ctrlafb_g1_1.3.0_00050137	chr6	+	63982356	64012175	63982356	64012175	10	63982356,63982737,63983921,63984620,63986250,63988273,63988984,64003219,64004841,64012122,	63982639,63982807,63984146,63984735,63986454,63988395,63989160,64003350,64004919,64012175,	Nrcam	18.0932	4.2e-26	13.1497	0.000204123	1.36553	0.0339372	1	1	0	0	0	0	0	1	0	0
ctrlafb_g1_1.3.0_00050269	chr6	-	74451038	74456911	74451038	74456911	4	74451038,74453649,74455710,74456640,	74452632,74453722,74455846,74456911,	Egln3	3.4399	0.00138166	1.08098	0.757857	3.01298	1	1	0	0	0	1	0	0	0	0	0
ctrlafb_g1_1.3.0_00050291	chr6	-	108826446	108924834	108826446	108924834	35	108826446,108827966,108828423,108828939,108829200,108829563,108830702,108831213,108832429,108833115,108838756,108839322,108839549,108840698,108841395,108841742,108842839,108846775,108851439,108852195,108854105,108854973,108856202,108856597,108857037,108859271,108861870,108878517,108879219,108880196,108880811,108881870,108902212,108917648,108924156,	108827617,108828115,108828704,108829106,108829337,108829691,108830785,108831404,108832572,108833240,108838878,108839447,108839671,108840823,108841520,108841864,108842958,108846894,108851567,108852323,108854218,108855012,108856221,108856812,108857201,108859393,108861944,108878619,108879502,108880402,108880981,108882051,108902464,108917718,108924834,	Ltbp2	4.18906	7.63e-09	2.10252	0.0164416	3.52907	0.102634	1	0	0	0	1	0	0	0	0	0
ctrlafb_g1_1.3.0_00050325	chr6	+	8064575	8082074	8064575	8082074	11	8064575,8068148,8070041,8073452,8076194,8076438,8077754,8078118,8078747,8080219,8080434,	8064803,8068252,8070197,8073692,8076357,8076518,8077953,8078194,8079014,8080346,8082074,	Abcg8	2.91713	1.17e-05	4.1226	0.02498	3.76964	1	1	0	0	0	1	0	0	0	0	0
ctrlafb_g1_1.3.0_00050338	chr6	+	26120168	26130994	26120168	26130994	12	26120168,26120779,26121301,26121950,26123804,26124682,26124977,26125722,26126712,26128626,26129067,26130297,	26120419,26120919,26121486,26122168,26124013,26124825,26125173,26125901,26128085,26128688,26129122,26130994,	Gpr113	2.63632	0.000327329	2.0869	0.0146351	2.4481	0.303656	1	0	0	0	1	0	0	0	0	0
ctrlafb_g1_1.3.0_00050367	chr6	+	63943370	64018760	63943370	64018760	29	63943370,63944466,63946607,63947840,63958198,63958843,63960654,63962928,63964323,63971509,63974135,63975608,63975871,63977664,63979951,63982442,63982737,63983921,63984620,63986250,63988273,63988984,63990475,63996888,63998063,64003219,64004841,64011510,64012122,	63943586,63944571,63946803,63947962,63958368,63958899,63960765,63963112,63964454,63971652,63974246,63975774,63976018,63977788,63980052,63982639,63982807,63984146,63984735,63986454,63988395,63989160,63990510,63997013,63998215,64003350,64004919,64011566,64018760,	Nrcam	15.756	1.12e-34	4.93373	0.000980392	58281.8	0.976745	1	1	0	0	0	0	0	1	0	0
ctrlafb_g1_1.3.0_00050368	chr6	+	63943370	64018760	63943370	64018760	27	63943370,63944466,63946607,63947840,63958198,63960654,63962928,63964323,63971509,63974135,63975871,63977664,63979951,63982442,63982737,63983921,63984620,63986250,63988273,63988984,63990475,63996888,63998063,64003219,64004841,64011510,64012122,	63943586,63944571,63946803,63947962,63958368,63960765,63963112,63964454,63971652,63974246,63976018,63977788,63980052,63982639,63982807,63984146,63984735,63986454,63988395,63989160,63990510,63997013,63998215,64003350,64004919,64011566,64018760,	Nrcam	15.3714	8.4e-34	4.93373	0.000601564	1.07926	0.916237	1	1	0	0	0	0	0	1	0	0
ctrlafb_g1_1.3.0_00050369	chr6	+	63958221	64018760	63958221	64018760	21	63958221,63960654,63962928,63964323,63971509,63974135,63975608,63975871,63977664,63978212,63979951,63982442,63982737,63983921,63984620,63986250,63988273,63988984,64003219,64004841,64012122,	63958368,63960765,63963112,63964454,63971652,63974246,63975774,63976018,63977788,63978241,63980052,63982639,63982807,63984146,63984735,63986454,63988395,63989160,64003350,64004919,64018760,	Nrcam	16.1781	8.3e-32	4.93373	0.00119976	0.313807	0.0112672	1	1	0	0	0	0	0	1	0	0
ctrlafb_g1_1.3.0_00050455	chr6	-	8027831	8035529	8027831	8035529	3	8027831,8030145,8035198,	8028287,8030257,8035529,	Abcg5	2.94835	1.52e-13	3.26391	0.00574257	5.02276	0.0685137	1	0	0	0	1	0	0	0	0	0
ctrlafb_g1_1.3.0_00050515	chr6	-	108826446	108833631	108826446	108833631	12	108826446,108827966,108828423,108828447,108828939,108829200,108829563,108830702,108831213,108832429,108833115,108833582,	108827617,108828115,108828436,108828704,108829106,108829337,108829691,108830785,108831404,108832572,108833240,108833631,	Ltbp2	4.77992	1.37e-07	2.10252	0.0180144	5.41527	0.102697	1	0	0	0	1	0	0	0	0	0
ctrlafb_g1_1.3.0_00050549	chr6	-	135531910	135562527	135531910	135562527	10	135531910,135534392,135535530,135537258,135538445,135538606,135547044,135548637,135553819,135562338,	135533825,135534528,135535631,135537436,135538493,135538684,135547114,135548726,135553933,135562527,	Rage	7.80823	9.54e-16	1.03849	0.858021	-1.92511e-05	1	1	0	0	0	1	0	0	0	0	0
ctrlafb_g1_1.3.0_00050550	chr6	-	135531910	135562527	135531910	135562527	10	135531910,135533711,135534392,135535530,135537258,135538606,135547044,135548637,135553819,135562338,	135532261,135533825,135534565,135535631,135537436,135538684,135547114,135548726,135553933,135562527,	Rage	8.34005	4.39e-26	1.03849	0.859795	15.7687	1	1	0	0	0	1	0	0	0	0	0
ctrlafb_g1_1.3.0_00050579	chr6	+	35830459	35940156	35830459	35940156	11	35830459,35906899,35922607,35923839,35926087,35926687,35926920,35927129,35929261,35933721,35936318,	35830535,35906978,35922728,35923944,35926223,35926764,35927036,35927208,35929387,35933791,35940156,	Fam49a	2.50125	4.3e-15	3.22096	0.000394011	7.48351	1	1	1	0	0	0	0	0	1	0	0
ctrlafb_g1_1.3.0_00050591	chr6	+	63717460	64018471	63717460	64018471	29	63717460,63777745,63859193,63940023,63942303,63944466,63946607,63947840,63958198,63960654,63962928,63964323,63971509,63974135,63975608,63975871,63977664,63979951,63982442,63982737,63983921,63984620,63986250,63988273,63988984,64003219,64004841,64011510,64012122,	63717631,63777888,63859249,63940224,63942320,63944571,63946803,63947962,63958368,63960765,63963112,63964454,63971652,63974246,63975774,63976018,63977788,63980052,63982639,63982807,63984146,63984735,63986454,63988395,63989160,64003350,64004919,64011566,64018471,	Nrcam	15.8848	3.17e-33	4.93373	0.00135475	0.268756	0.0155822	1	1	0	0	0	0	0	1	0	0
ctrlafb_g1_1.3.0_00050592	chr6	+	63943363	64018471	63943363	64018471	28	63943363,63944466,63946607,63947840,63958198,63958843,63960654,63962928,63964323,63971509,63974135,63975608,63975871,63977664,63979951,63982442,63982737,63983921,63984620,63986250,63988273,63988984,63990475,63996888,63998063,64003219,64004841,64012122,	63943586,63944571,63946803,63947962,63958368,63958899,63960765,63963112,63964454,63971652,63974246,63975774,63976018,63977788,63980052,63982639,63982807,63984146,63984735,63986454,63988395,63989160,63990510,63997013,63998215,64003350,64004919,64018471,	Nrcam	15.7089	1.1e-33	4.93373	0.000596421	0.0599431	0.167218	1	1	0	0	0	0	0	1	0	0
ctrlafb_g1_1.3.0_00050594	chr6	+	63982441	64025003	63982441	64025003	12	63982441,63982737,63983921,63984620,63986250,63988273,63988984,64003219,64004841,64011510,64012122,64024841,	63982639,63982807,63984146,63984735,63986454,63988395,63989160,64003350,64004919,64011566,64012276,64025003,	Nrcam	17.9995	3.67e-23	13.1497	0.000198847	12.7039	0.0128004	1	1	0	0	0	0	0	1	0	0
ctrlafb_g1_1.3.0_00050713	chr6	-	135531596	135562497	135531596	135562497	9	135531596,135532064,135534392,135535530,135537258,135547044,135548637,135553819,135562338,	135531981,135532261,135534528,135535631,135537436,135547114,135548726,135553933,135562497,	Rage	7.60257	2.88e-25	1.03849	0.865164	6.13365	1	1	0	0	0	1	0	0	0	0	0
ctrlafb_g1_1.3.0_00050885	chr7	+	13119551	13134015	13119551	13134015	13	13119551,13119936,13122954,13125948,13126087,13127384,13128134,13129071,13129328,13132294,13132539,13132764,13133091,	13119619,13120137,13123098,13126001,13126214,13127505,13128410,13129137,13129457,13132427,13132603,13132846,13134015,	Cyp4f5	3.40974	0.000842328	3.01825	0.0038291	3.49281	0.0293042	1	1	0	0	0	0	0	1	0	0
ctrlafb_g1_1.3.0_00050941	chr7	+	24778133	24779449	24778133	24779449	3	24778133,24778759,24779210,	24778438,24778957,24779449,	Pmch	2.706	0.00357651	1.33812	0.250747	0	1	1	0	0	0	1	0	0	0	0	0
ctrlafb_g1_1.3.0_00050981	chr7	+	35004234	35045189	35004234	35045189	8	35004234,35008947,35020208,35031762,35032930,35037265,35041101,35044494,	35004259,35009166,35020320,35031975,35033043,35037358,35041239,35045189,	Dcn	2.03022	1.16e-05	1.4331	0.00118694	1.99795	1	1	0	0	0	1	0	0	0	0	0
ctrlafb_g1_1.3.0_00050982	chr7	+	35007893	35045189	35007893	35045189	8	35007893,35008947,35020208,35031762,35032930,35037265,35041101,35044494,	35008096,35009166,35020320,35031975,35033043,35037358,35041239,35045189,	Dcn	2.03039	7.16e-06	1.4331	0.00221551	2.02994	1	1	0	0	0	1	0	0	0	0	0
ctrlafb_g1_1.3.0_00051023	chr7	+	55104257	55136906	55104257	55136906	8	55104257,55113450,55118509,55120492,55120673,55128689,55130916,55136625,	55104546,55113512,55118646,55120566,55120780,55128814,55130999,55136906,	Tspan8	4.44746	6.65e-12	1.82158	0.00377508	4.61556	0.00170483	1	0	1	0	0	0	0	0	1	0
ctrlafb_g1_1.3.0_00051070	chr7	+	67477745	67485913	67477745	67485913	12	67477745,67479582,67479887,67480367,67480660,67481734,67484312,67484562,67484806,67485053,67485184,67485486,	67478711,67479648,67480151,67480464,67480723,67481831,67484378,67484614,67484891,67485104,67485321,67485913,	Stac3	-2.31237	6.76e-05	-2.06482	0.00391926	-2.95004	1	1	1	0	0	0	0	0	1	0	0
ctrlafb_g1_1.3.0_00051071	chr7	+	67478506	67485909	67478506	67485909	12	67478506,67479487,67479887,67480367,67480660,67481734,67484312,67484562,67484806,67485053,67485184,67485486,	67478544,67479648,67480151,67480464,67480723,67481831,67484378,67484614,67484891,67485104,67485321,67485909,	Stac3	-2.31535	7.99e-05	-2.06482	0.00302602	-2.20624	1	1	1	0	0	0	0	0	1	0	0
ctrlafb_g1_1.3.0_00051072	chr7	+	67478738	67485913	67478738	67485913	12	67478738,67479582,67479887,67480367,67480660,67481734,67484312,67484562,67484806,67485053,67485184,67485486,	67478786,67479648,67480151,67480464,67480723,67481831,67484378,67484614,67484891,67485104,67485321,67485913,	Stac3	-2.34495	6.09e-05	-2.06482	0.00220839	-2.16132	1	1	1	0	0	0	0	0	1	0	0
ctrlafb_g1_1.3.0_00051073	chr7	+	67478760	67485913	67478760	67485913	11	67478760,67479887,67480367,67480660,67481734,67484312,67484562,67484806,67485053,67485184,67485486,	67478786,67480151,67480464,67480723,67481831,67484378,67484614,67484891,67485104,67485321,67485913,	Stac3	-2.34201	6.84e-05	-2.06482	0.00550747	-5.92856	1	1	0	0	0	1	0	0	0	0	0
ctrlafb_g1_1.3.0_00051275	chr7	+	118951184	118980287	118951184	118980287	5	118951184,118969412,118970021,118971320,118978726,	118951707,118969579,118970142,118972005,118980287,	Fam83f	7.86236	0.00210395	2.21527	0.000200562	3.83511	0.0800961	1	1	0	0	0	0	0	1	0	0
ctrlafb_g1_1.3.0_00051333	chr7	+	123208154	123287289	123208154	123287289	17	123208154,123221997,123226166,123228954,123231293,123232497,123233142,123234241,123238678,123239479,123240329,123241608,123242947,123245140,123264656,123266623,123286605,	123208356,123222102,123226301,123229125,123231349,123232598,123233279,123234378,123238821,123239607,123240454,123241727,123243078,123245263,123264798,123266754,123287289,	Fbln1	2.40536	0.00015262	1.47726	0.0131317	2.1915	0.0981796	1	0	0	0	1	0	0	0	0	0
ctrlafb_g1_1.3.0_00051339	chr7	+	123861784	123878554	123861784	123878554	12	123861784,123862094,123863776,123863944,123866395,123867913,123869092,123873443,123875798,123876930,123877498,123878112,	123861883,123862183,123863833,123864541,123866550,123868039,123869466,123873515,123876034,123877173,123877713,123878554,	Gtse1	6.20343	8.6e-21	1.73327	0.032943	12.1668	0.00176149	1	0	1	0	0	0	0	0	1	0
ctrlafb_g1_1.3.0_00051340	chr7	+	123862066	123878554	123862066	123878554	11	123862066,123863776,123863944,123866395,123867913,123869092,123873443,123875798,123876930,123877498,123878112,	123862183,123863833,123864541,123866550,123868039,123869466,123873515,123876034,123877173,123877713,123878554,	Gtse1	6.15845	2.61e-21	1.73327	0.0387303	-0.24307	0.0820544	1	0	0	0	1	0	0	0	0	0
ctrlafb_g1_1.3.0_00051352	chr7	+	127364190	127374412	127364190	127374412	3	127364190,127371088,127373066,	127364430,127372551,127374412,	Panx2	2.16896	3.37e-05	1.89282	0.0297821	2.89441	0.0144004	1	0	0	0	1	0	0	0	0	0
ctrlafb_g1_1.3.0_00051407	chr7	+	138337731	138341257	138337731	138341257	4	138337731,138339229,138339814,138340556,	138338195,138339393,138339897,138341257,	Aqp5	6.95602	8.58e-19	3.38109	0.000404858	8.21548	1	1	1	0	0	0	0	0	1	0	0
ctrlafb_g1_1.3.0_00051442	chr7	+	141047821	141074675	141047821	141074675	31	141047821,141048188,141049062,141050293,141050684,141053316,141054396,141055357,141056023,141056256,141056577,141060687,141061709,141062795,141063329,141063573,141064360,141066091,141067573,141068080,141069718,141070021,141070944,141071179,141072306,141072557,141072852,141073141,141073412,141073621,141074018,	141047866,141048277,141050117,141050397,141050795,141053452,141054589,141055596,141056167,141056394,141056716,141060821,141061828,141062966,141063457,141063729,141064469,141067076,141067921,141068241,141069931,141070211,141071071,141071301,141072461,141072727,141072956,141073256,141073495,141073785,141074675,	Espl1	3.6742	6.29e-09	2.95027	0.00570979	0	1	1	0	0	0	1	0	0	0	0	0
ctrlafb_g1_1.3.0_00051447	chr7	+	141203832	141212653	141203832	141212653	11	141203832,141204221,141204602,141205050,141205315,141205548,141210395,141210626,141210931,141211224,141212209,	141203942,141204403,141204793,141205121,141205433,141205778,141210509,141210798,141211078,141211360,141212653,	Amhr2	3.74891	0.000363707	1.2568	0.532268	3.4603	0.0840123	1	0	0	0	1	0	0	0	0	0
ctrlafb_g1_1.3.0_00051468	chr7	-	1267777	1289002	1267777	1289002	4	1267777,1270996,1274381,1288749,	1268312,1271159,1274641,1289002,	Hsd17b6	-2.48487	2.17e-06	-1.3896	0.118275	-3.21306	1	1	0	0	0	1	0	0	0	0	0
ctrlafb_g1_1.3.0_00051562	chr7	-	10858118	10866537	10858118	10866537	15	10858118,10859420,10859609,10860649,10861158,10861436,10861841,10862110,10862323,10863117,10863295,10864121,10864657,10864907,10866326,	10858508,10859530,10859738,10860805,10861235,10861504,10861921,10862236,10862521,10863212,10863382,10864250,10864773,10865014,10866537,	Plk5	8.11782	0.00305134	1.61635	0.0268645	3.36282	0.226505	1	0	0	0	1	0	0	0	0	0
ctrlafb_g1_1.3.0_00051563	chr7	-	10885265	10892032	10885265	10892032	5	10885265,10887870,10888280,10888510,10891795,	10886766,10888038,10888418,10888603,10892032,	Reep6	2.51917	2.97e-07	1.69411	0.0901672	2.48939	8.06411e-06	1	0	1	0	0	0	0	0	1	0
ctrlafb_g1_1.3.0_00051564	chr7	-	10885266	10891936	10885266	10891936	6	10885266,10887222,10887870,10888280,10888510,10891795,	10886766,10887302,10888038,10888418,10888603,10891936,	Reep6	2.51775	3.14e-07	1.69411	0.0829278	3.13812	0.000727678	1	0	1	0	0	0	0	0	1	0
ctrlafb_g1_1.3.0_00051799	chr7	-	56996694	57020926	56996694	57020926	11	56996694,56999756,57001109,57004608,57005463,57005835,57011382,57012470,57019933,57020190,57020757,	56998497,56999833,57001264,57004756,57005559,57005893,57011431,57012603,57020017,57020262,57020926,	Mdm2	2.5126	3.33e-15	2.77803	0.000399361	2.83688	1	1	1	0	0	0	0	0	1	0	0
ctrlafb_g1_1.3.0_00051800	chr7	-	56996694	57020957	56996694	57020957	12	56996694,56999756,57001109,57004608,57005463,57005835,57011382,57012470,57015489,57019933,57020190,57020757,	56998497,56999833,57001264,57004756,57005559,57005893,57011431,57012603,57015563,57020017,57020262,57020957,	Mdm2	2.50675	3.69e-15	2.77803	0.000403307	2.31053	1	1	1	0	0	0	0	0	1	0	0
ctrlafb_g1_1.3.0_00051870	chr7	-	70021792	70135156	70021792	70135156	11	70021792,70023837,70024998,70029697,70031485,70041560,70050108,70074130,70099518,70101162,70134524,	70022454,70023931,70025061,70029785,70031620,70041656,70050229,70074189,70099689,70101230,70135156,	Nipal2	2.66455	3.8e-09	3.98424	0.00203417	2.65538	0.000673945	1	1	1	1	0	0	0	0	0	0
ctrlafb_g1_1.3.0_00051935	chr7	-	95071005	95089900	95071005	95089900	8	95071005,95074614,95078125,95082230,95083279,95085048,95085232,95089867,	95071790,95074726,95078200,95082331,95083347,95085127,95085390,95089900,	Anxa13	3.5052	2.1e-08	2.34122	0.000195427	-1.84823	1	1	1	0	0	0	0	0	1	0	0
ctrlafb_g1_1.3.0_00051936	chr7	-	95071045	95123201	95071045	95123201	11	95071045,95074614,95078125,95082230,95083279,95085048,95085232,95089867,95093139,95101185,95123165,	95071790,95074726,95078200,95082331,95083347,95085127,95085265,95090037,95093233,95101269,95123201,	Anxa13	3.2732	2.02e-09	2.34122	0.00158762	5.02037	0.0120602	1	1	0	0	0	0	0	1	0	0
ctrlafb_g1_1.3.0_00051948	chr7	-	97799121	97802842	97799121	97802842	8	97799121,97799390,97800402,97801161,97801650,97802259,97802669,97802780,	97799251,97799677,97800698,97801457,97801922,97802567,97802704,97802842,	A1bg	8.58737	8.23e-23	7.84071	0.000398724	12.3454	0.0239218	1	1	0	0	0	0	0	1	0	0
ctrlafb_g1_1.3.0_00051984	chr7	-	113306011	113310996	113306011	113310996	4	113306011,113307487,113308556,113310923,	113306616,113307606,113308653,113310996,	Ly6b	46.5697	1.56e-05	3.7872	0.0165127	10.8008	0.0477943	1	0	0	0	1	0	0	0	0	0
ctrlafb_g1_1.3.0_00052089	chr7	-	116811332	116817822	116811332	116817822	4	116811332,116811780,116812810,116817790,	116811665,116811939,116812892,116817822,	Lgals2	3.07657	6.55e-05	1.40195	0.0442937	3.52174	0.00194653	1	0	1	0	0	0	0	0	1	0
ctrlafb_g1_1.3.0_00052244	chr7	-	136565204	136617296	136565204	136617296	10	136565204,136569692,136570004,136577353,136579549,136579890,136585832,136594318,136597846,136617264,	136568549,136569808,136570155,136577524,136579657,136580074,136585962,136594465,136597920,136617296,	Vdr	15.5562	2.85e-08	3.02003	0.00138669	11.0594	0.000286809	1	1	1	1	0	0	0	0	0	0
ctrlafb_g1_1.3.0_00052289	chr7	-	138366356	138395716	138366356	138395716	17	138366356,138367885,138368970,138369316,138369609,138371762,138372044,138374216,138376519,138377386,138378025,138379487,138381341,138382645,138383884,138386501,138395540,	138366843,138367990,138369093,138369448,138369714,138371960,138372139,138374380,138376646,138377503,138378105,138379537,138381410,138382781,138384089,138386589,138395716,	Racgap1	2.7197	0.000623584	2.53789	0.00180144	3.38344	1	1	1	0	0	0	0	0	1	0	0
ctrlafb_g1_1.3.0_00052472	chr7	+	67477174	67485911	67477174	67485911	12	67477174,67479582,67479887,67480367,67480660,67481734,67484312,67484562,67484806,67485053,67485184,67485486,	67477338,67479648,67480151,67480464,67480723,67481831,67484378,67484614,67484891,67485104,67485321,67485911,	Stac3	-2.33249	6.46e-05	-2.06482	0.00425359	0	1	1	1	0	0	0	0	0	1	0	0
ctrlafb_g1_1.3.0_00052474	chr7	+	67478413	67485911	67478413	67485911	12	67478413,67479582,67479893,67480367,67480660,67481734,67484312,67484562,67484806,67485053,67485184,67485486,	67478711,67479648,67480151,67480464,67480723,67481831,67484378,67484614,67484891,67485104,67485321,67485911,	Stac3	-2.30969	6.74e-05	-2.06482	0.00497909	-1.71054	1	1	1	0	0	0	0	0	1	0	0
ctrlafb_g1_1.3.0_00052475	chr7	+	67478955	67485911	67478955	67485911	12	67478955,67479582,67479887,67480367,67480660,67481734,67484312,67484562,67484806,67485053,67485184,67485486,	67478994,67479648,67480151,67480464,67480723,67481831,67484378,67484614,67484891,67485104,67485321,67485911,	Stac3	-2.35443	6.29e-05	-2.06482	0.00376909	-0.210248	1	1	1	0	0	0	0	0	1	0	0
ctrlafb_g1_1.3.0_00052587	chr7	+	141047816	141074675	141047816	141074675	31	141047816,141048159,141049062,141050293,141050684,141053316,141054396,141055357,141056023,141056256,141056577,141060687,141061709,141062795,141063329,141063573,141064360,141066091,141067573,141068080,141069718,141070021,141070944,141071179,141072306,141072557,141072852,141073141,141073412,141073621,141074018,	141047866,141048277,141050117,141050397,141050795,141053452,141054589,141055596,141056167,141056394,141056716,141060821,141061828,141062966,141063457,141063729,141064469,141067076,141067921,141068241,141069931,141070211,141071071,141071301,141072461,141072727,141072956,141073256,141073495,141073785,141074675,	Espl1	3.6742	6.29e-09	2.95027	0.00775656	2.94571	0.378141	1	0	0	0	1	0	0	0	0	0
ctrlafb_g1_1.3.0_00052593	chr7	-	1267777	1274715	1267777	1274715	3	1267777,1270996,1274381,	1268312,1271159,1274715,	Hsd17b6	-2.50106	1.73e-06	-1.3896	0.115423	-2.97802	1	1	0	0	0	1	0	0	0	0	0
ctrlafb_g1_1.3.0_00052845	chr7	-	138365874	138395716	138365874	138395716	16	138365874,138367885,138368970,138369316,138369609,138371762,138374216,138376519,138377386,138378025,138379487,138381341,138382645,138383884,138386501,138395540,	138366843,138367990,138369093,138369448,138369714,138371960,138374380,138376646,138377503,138378105,138379537,138381410,138382781,138384089,138386589,138395716,	Racgap1	2.56012	0.0012856	2.40821	0.0019755	2.2586	1	1	1	0	0	0	0	0	1	0	0
ctrlafb_g1_1.3.0_00053151	chr7	-	56996694	57000716	56996694	57000716	2	56996694,56999756,	56998497,57000716,	Mdm2	2.56993	1.8e-15	2.44168	0.00263638	2.04547	1	1	1	0	0	0	0	0	1	0	0
ctrlafb_g1_1.3.0_00053152	chr7	-	56996694	57020926	56996694	57020926	12	56996694,56999756,57001109,57004608,57005463,57005832,57011382,57012470,57015489,57019933,57020190,57020757,	56998497,56999833,57001264,57004756,57005556,57005893,57011431,57012603,57015563,57020017,57020262,57020926,	Mdm2	2.50342	3.96e-15	2.77803	0.000202184	-0.430516	1	1	1	0	0	0	0	0	1	0	0
ctrlafb_g1_1.3.0_00053182	chr7	-	97798804	97802842	97798804	97802842	7	97798804,97800402,97801161,97801650,97802259,97802669,97802780,	97799677,97800698,97801457,97801922,97802567,97802704,97802842,	A1bg	8.25112	1.36e-23	7.84071	0.000607903	2.35425	0.3908	1	1	0	0	0	0	0	1	0	0
[truncated: 175 more rows]
