# Supplementary material for: RNA-Seq Profiling Reveals Novel Hepatic Gene Expression Pattern in Aflatoxin B1 Treated Rats
Source: PLoS One. 2013 Apr 22;8(4):e61768. doi: 10.1371/journal.pone.0061768 (PMC3632591; doi:10.1371/journal.pone.0061768)
Supplement: Table S2 — Top 30 overexpressed transcripts by DESeq, Microarray, Cuffdiff analysis. (XLSX) [file pone.0061768.s012.xlsx]

## Sheet: Table S-2
Table Suppl-2. Top 30 overexpressed genes found by RNASeq (DESeq and Cuffdiff) and microarray analysis.
Gene	DESeq Fold Change	DESeq adjusted p value		Gene	Cuffdiff Fold Change	Cuffdiff q value		Gene	Microarray Fold Change	Microarray Nominal P value
Pcp4	394.01	1.6e-15		Cpa1	209.81	0.000410085		Ddit4l	142.56	0.000604
Aldh3a1	288.08	1.73e-11		Cdh13	110.17	0		Cdh13	66.19	0.0002
Dnaaf1	194.15	2.59e-05		Ddit4l	86.56	0.00434345		Trim54	40.2	0.0002
Nefl	155.54	3.84e-16		Gstp1	73.16	0		Gstp1	35.11	0.000199
Gsta5	107.73	2.08e-23		Slc7a11	59.42	2.57e-08		Pcp4	28.44	0.0002
Ddit4l	98.02	4.39e-07		Akr1b10	32.18	0.00278472		Defb1	20.8	0.000202
Trim54	88.54	1.11e-21		Akr1b7	29	0		Abcb1b	17.33	0.000203
Gstp1	73.57	1.71e-10		Akr1b8	29	0		Akr7a3	15.35	0.000202
Cdh13	73.56	9.76e-78		Gpx2	27.98	5.54e-09		Bex1	15.28	0.000198
Slc16a5	66.7	2.94e-13		Mybl2	22.97	2.3e-09		Akr1b7	15.27	0.000605
Akr1b7	51.67	4.52e-06		Ogdhl	18.58	0.0486405		Svop	14.58	0.000202
Slc7a11	51.06	2.38e-23		Nrcam	15.71	8.98e-14		Ccdc92	14.39	0.000596
Nefm	49.36	5.87e-12		Ppm1j	15.25	0.0452045		Gpx2	13.45	0.000613
Tmem72	49.27	0.000279346		Akr7a3	14.83	0		Ppm1j	13.29	0.000203
Pln	44.9	2.76e-14		Lama5	14.52	0		Dnaaf1	12.99	0.002194
Ly6b	44.47	0.000361301		Mmd	14.05	2.74e-08		RGD1561849	11.97	0.000809
Klhl14	38.7	1.6e-06		RT1-T24-1	12.69	1.43e-10		Nefm	11.48	0.000401
Abcb1b	36.03	5.49e-145		Vdr	11.06	0.0136923		Abcc3	11.34	0.000199
Clec4m	32.53	4.69e-15		A1bg	10.86	0.000221588		Hdgfrp3	10.99	0.000198
Akr1b8	31.03	5.2e-17		Nhej1	10.32	3.26e-10		Mybl2	10.91	0.000399
Gucy2c	29.36	0.0159496		Ropn1	10.07	0.0376257		Nrcam	9.04	0.000401
Scn1a	29.34	0.0233745		Car2	9.84	0		Efhc2	8.37	0.000989
Gpr64	27.47	1.62e-15		Gcnt3	9.13	1.7e-05		Aldh3a1	8.32	0.000403
Akr1b10	26.21	0.00379797		Phgdh	8.94	0.00804851		Snx10	8.13	0.000199
Grin2c	25.87	1.51e-09		Aldh3a1	7.84	0.000598461		Ugt2b7	8.11	0.000594
Vdr	25.25	2.62e-08		Elovl7	7.81	0.000659755		Nefl	7.88054	0.0004
Mybl2	24.51	5.77e-07		Rhbg	7.74	3.33e-08		Ugt1a6	7.62905	0.000199
RT1-M4	24.45	0.0124153		RGD1559690	7.19	0.0357468		Fabp4	7.62009	0.002621
Csmd1	24.21	1.37e-113		Snx10	6.74	0		RGD1559690	7.44828	0.000811
Syn2	23.5555	3.1e-05		Nqo1	6.25	6.09e-08		A1bg	7.23939	0.000396
