# Supplementary material for: RNA-Seq Profiling Reveals Novel Hepatic Gene Expression Pattern in Aflatoxin B1 Treated Rats
Source: PLoS One. 2013 Apr 22;8(4):e61768. doi: 10.1371/journal.pone.0061768 (PMC3632591; doi:10.1371/journal.pone.0061768)
Supplement: Table S5 — Genomic location of novel exons. (XLSX) [file pone.0061768.s015.xlsx]

## Sheet: Table S-5
chrom	software	type	start	stop	strand	gene	exon_class	#afb0_reads	#afb1_reads	#afb2_reads	#afb3_reads	#ctrl0_reads	#ctrl1_reads	#ctrl2_reads	#ctrl3_reads	#overlaps_with_non_rat_refseq_exon	non_rat_refseq_gene	#overlaps_with_ensembl_exons	ensembl_gene
chr17	Cufflinks	exon	77190581	77191130	-		NOVEL-U	602	679	602	678	979	744	864	645	0	0	0	0
chr1	Cufflinks	exon	70431581	70432344	.		NOVEL-U	4390	4107	7999	4502	2895	3219	4509	3738	0	0	0	0
chr1	Cufflinks	exon	6809804	6809899	.		NOVEL-U	13836	8443	13485	10324	11894	4811	11810	18054	0	0	0	0
chr8	Cufflinks	exon	7220846	7220971	.		NOVEL-U	3073	1297	1158	2144	1945	1380	2080	2247	0	0	0	0
chr7	Cufflinks	exon	31612819	31614983	-		NOVEL-U	805	765	891	1032	1868	2189	2179	2716	0	0	0	0
chr18	Cufflinks	exon	57016336	57016659	-	Pdgfrb	NOVEL-T	639	972	722	1168	764	731	1175	1348	0	0	0	0
chr17	Cufflinks	exon	77147725	77148217	-	Akr1c12	NOVEL-T	887	987	805	1014	1227	974	1282	1106	0	0	0	0
chr7	Cufflinks	exon	33020037	33021263	-		NOVEL-U	726	781	809	947	737	657	885	883	0	0	0	0
chr14	Cufflinks	exon	101801108	101804680	+		NOVEL-U	1082	787	672	947	1118	899	932	971	0	0	0	0
chr7	Cufflinks	exon	31615931	31617027	-		NOVEL-U	654	629	756	909	1295	1607	1564	1883	0	0	0	0
chr15	Cufflinks	exon	32521777	32522734	+		NOVEL-U	1007	1048	757	1139	788	891	1029	952	0	0	0	0
chr10	Cufflinks	exon	82763898	82766708	-		NOVEL-U	1909	1450	1498	1863	1724	1856	2135	1370	0	0	0	0
chr8	Cufflinks	exon	36127478	36127591	-		NOVEL-U	13279	9238	5031	14567	11154	13493	16306	11733	0	0	1	ENSRNOG00000043131
chr8	Cufflinks	exon	36411374	36411487	-		NOVEL-U	8804	5542	5300	7330	11104	7596	8264	8168	0	0	1	ENSRNOG00000042298
chr13	Cufflinks	exon	53029100	53029275	-		NOVEL-U	828	890	818	1031	1144	1001	1061	1057	0	0	1	ENSRNOG00000033745
chr8	Cufflinks	exon	36412311	36412699	-		NOVEL-U	3544	2117	3672	2413	5544	1628	3012	2343	0	0	2	ENSRNOG00000042298,ENSRNOG00000042298
chr8	Cufflinks	exon	36126860	36127013	-		NOVEL-U	799	1774	1248	806	2235	800	1263	881	0	0	3	ENSRNOG00000043131,ENSRNOG00000043131,ENSRNOG00000043131
chr14	Cufflinks	exon	21932575	21936306	-		NOVEL-U	3091	856	2196	870	6195	4073	6050	3846	0	0	3	ENSRNOG00000039301,ENSRNOG00000039301,ENSRNOG00000039301
chr14	Cufflinks	exon	21932575	21936586	-		NOVEL-U	3282	883	2310	923	6566	4173	6337	4046	0	0	3	ENSRNOG00000039301,ENSRNOG00000039301,ENSRNOG00000039301
chr15	Cufflinks	exon	44172182	44177580	-		NOVEL-U	804	745	926	806	928	759	1016	816	0	0	6	ENSRNOG00000038711,ENSRNOG00000038711,ENSRNOG00000038711,ENSRNOG00000013326,ENSRNOG00000013326,ENSRNOG00000013326
chr13	Cufflinks	exon	87114451	87114549	+		NOVEL-U	26044	46195	37717	59197	40700	26749	48420	51528	1	NM_013474	0	0
chr1	Cufflinks	exon	244006762	244006903	+	Cyp2c7,Cyp2c7	NOVEL-T	1339	2690	2804	2430	3321	3214	4855	5106	1	NM_001167875	0	0
chr6	Cufflinks	exon	94915158	94915280	-		NOVEL-U	2376	2021	2511	2658	2527	3854	3969	2879	1	NM_016029	0	0
chr3	Cufflinks	exon	10578664	10578725	+		NOVEL-U	2464	4606	2144	3650	4493	3214	3803	3527	1	NR_002687	0	0
chr20	Cufflinks	exon	10948857	10950355	-		NOVEL-U	1782	2067	1846	2335	1543	1751	1931	2079	1	NM_015790	1	ENSRNOG00000023109
chr1	Cufflinks	exon	206645620	206645727	-	RGD1307603	NOVEL-T	1074	1485	1954	2481	2847	3298	3964	3086	1	NM_144869	1	ENSRNOG00000018287
chr4	Cufflinks	exon	144366443	144366626	+		NOVEL-U	713	1187	1087	629	1136	668	986	1086	1	NM_001246715	1	ENSRNOG00000007944
chr1	Cufflinks	exon	245142872	245143048	-		NOVEL-U	4891	5326	5536	5530	5150	3304	6534	4940	1	NM_001167877	1	ENSRNOG00000001466
chr3	Cufflinks	exon	136620355	136627769	-		NOVEL-U	3813	1239	2224	1878	4405	3567	4481	2612	2	NM_001033119,NM_001033119	0	0
chr3	Cufflinks	exon	14041635	14041794	-		NOVEL-U	703	595	1108	811	1003	1030	997	1054	2	NM_001204059,NM_001735	0	0
chr3	Cufflinks	exon	14045355	14045567	-		NOVEL-U	1108	839	1441	1165	1500	1452	1364	1495	2	NM_001001646,NM_001166616	0	0
chr17	Cufflinks	exon	79703612	79703719	+		NOVEL-U	1447	1595	2081	1788	2208	2030	1861	1632	2	NM_001130741,NM_213903	1	ENSRNOG00000001066
chr3	Cufflinks	exon	14017523	14017612	-		NOVEL-U	564	784	955	744	811	982	963	1106	2	NM_001001646,NM_001166616	1	ENSRNOG00000018899
chr17	Cufflinks	exon	79697694	79697798	+		NOVEL-U	531	632	772	709	864	800	744	688	2	NM_001082647,NM_213903	1	ENSRNOG00000001066
chr6	Cufflinks	exon	71847352	71847959	-		NOVEL-U	881	757	924	1045	867	777	945	860	2	NM_001002504,NM_001261259	1	ENSRNOG00000006905
chr3	Cufflinks	exon	14031710	14031862	-		NOVEL-U	661	710	984	749	1061	766	998	1043	2	NM_001001646,NM_001735	1	ENSRNOG00000018899
chr16	Cufflinks	exon	81312671	81312788	-		NOVEL-U	565	707	592	741	713	774	744	749	2	NM_025834,NM_001256134	1	ENSRNOG00000019700
chr4	Cufflinks	exon	158582575	158582758	-		NOVEL-U	1887	1535	2374	1922	2518	2259	2250	1990	2	NM_008645,NR_027619	1	ENSRNOG00000033245
chr1	Cufflinks	exon	245147890	245148060	-		NOVEL-U	7687	4455	4963	5947	7409	4698	6231	4742	2	NM_001109792,NM_001167877	1	ENSRNOG00000001466
chr1	Cufflinks	exon	245147890	245148039	-		NOVEL-U	7684	4442	4950	5934	7398	4683	6223	4736	2	NM_001109792,NM_001167877	1	ENSRNOG00000001466
chr1	Cufflinks	exon	245144168	245144328	-		NOVEL-U	3142	2713	3445	4113	2804	3764	5248	3308	2	NM_001167877,NM_001167877	1	ENSRNOG00000001466
chr13	Cufflinks	exon	53015242	53015418	-		NOVEL-U	1219	1184	1198	1357	1586	1698	1566	1508	2	NM_001025575,NM_214281	1	ENSRNOG00000033745
chr15	Cufflinks	exon	27078718	27078784	+	Rnase4	NOVEL-T	3507	4761	3964	3950	5556	2770	4126	3619	3	NM_201239,NM_001123394,NM_007448	0	0
chr6	Cufflinks	exon	94913761	94914550	-		NOVEL-U	7183	8554	8520	8986	8815	8742	10239	8915	3	NM_016029,NM_016029,NM_016029	0	0
chr6	Cufflinks	exon	94913759	94914550	-		NOVEL-U	7183	8554	8520	8986	8815	8742	10239	8915	3	NM_016029,NM_016029,NM_016029	0	0
chr3	Cufflinks	exon	14037552	14037723	-		NOVEL-U	726	641	1125	828	946	966	917	1029	3	NM_001001646,NM_010406,NM_001204059	0	0
chr16	Cufflinks	exon	81315823	81315954	-		NOVEL-U	770	800	773	990	926	1100	891	970	3	NM_025834,NM_001256134,NM_001168977	1	ENSRNOG00000019700
chr19	Cufflinks	exon	11458442	11458545	+		NOVEL-U	747	758	709	731	759	803	661	752	3	NM_001144,NM_213163,NM_001017083	1	ENSRNOG00000019444
chr13	Cufflinks	exon	53004830	53005006	-		NOVEL-U	1526	1558	1465	2157	1922	1711	2111	1930	3	NM_006684,NM_001201550,NM_001201550	1	ENSRNOG00000033745
chr18	Cufflinks	exon	52316543	52316640	-		NOVEL-U	616	787	601	795	809	652	883	763	3	NM_001139783,NM_001094229,NM_001182	1	ENSRNOG00000014645
chr17	Cufflinks	exon	79715293	79715478	+		NOVEL-U	3002	3067	3752	4145	3657	3982	4513	3693	3	NM_001130741,NM_213903,NM_001094861	1	ENSRNOG00000001066
chr17	Cufflinks	exon	79719950	79720087	+		NOVEL-U	1624	1794	2168	1896	1753	1842	1793	1665	3	NM_010582,NM_001098016,NM_213903	1	ENSRNOG00000001066
chr17	Cufflinks	exon	32853259	32855553	-		NOVEL-U	949	742	1065	815	942	816	753	981	3	NM_004415,NM_023842,NM_001008844	1	ENSRNOG00000013928
chr18	Cufflinks	exon	52307787	52307871	-		NOVEL-U	550	727	619	683	667	660	787	665	3	NM_212724,NM_001182,NM_001094229	1	ENSRNOG00000014645
chr13	Cufflinks	exon	52879192	52879377	+	F13b	NOVEL-T	714	988	988	1135	910	875	1110	966	3	NM_031164,NM_001994,NM_001038529	1	ENSRNOG00000012613
chr13	Cufflinks	exon	80586956	80587063	+	Dpt	NOVEL-T	1181	1808	1310	1734	1315	1344	1471	1479	3	NM_019759,NM_001174015,NM_001937	1	ENSRNOG00000002947
chr6	Cufflinks	exon	94918225	94918464	-		NOVEL-U	2128	2620	2577	2403	3260	2522	3414	2923	4	NM_016029,NM_001016596,NM_001016596,NM_001016596	0	0
chr1	Cufflinks	exon	245148199	245148361	-		NOVEL-U	2395	1673	2282	2725	1626	2765	2908	2046	4	NM_001205152,NM_001109792,NM_001167877,NM_001197044	1	ENSRNOG00000001466
chr17	Cufflinks	exon	79704332	79704460	+		NOVEL-U	1389	1556	1850	2009	2183	1887	2127	1953	4	NM_213007,NM_213903,NM_001098016,NM_010582	1	ENSRNOG00000001066
chr3	Cufflinks	exon	14012541	14012679	-		NOVEL-U	996	871	1027	1119	1185	1098	1334	1479	4	NM_001166616,NM_010406,NM_001001646,NM_001735	1	ENSRNOG00000018899
chr2	Cufflinks	exon	219617922	219618624	+		NOVEL-U	761	1141	817	1329	1301	601	1481	1094	4	NM_024461,NM_024461,NM_024461,NM_024461	1	ENSRNOG00000014654
chr3	Cufflinks	exon	68297174	68299275	+		NOVEL-U	865	745	859	747	971	1010	931	1048	4	NM_033396,NM_001081260,NM_033396,NM_033396	1	ENSRNOG00000009195
chr4	Cufflinks	exon	144371432	144371602	+		NOVEL-U	790	1260	1242	625	1051	695	1122	1099	4	NM_069401,NM_001246715,NM_001006143,NM_001173921	1	ENSRNOG00000007944
chr4	Cufflinks	exon	144377673	144377876	+		NOVEL-U	1013	1511	1463	852	1470	787	1441	1427	4	NM_204066,NM_001173921,NM_201189,NM_001246715	1	ENSRNOG00000007944
chr17	Cufflinks	exon	79705712	79705828	+		NOVEL-U	1732	1687	1985	1963	2503	1977	2196	1798	4	NM_001082647,NM_001098016,NM_002216,NM_213903	1	ENSRNOG00000001066
chr17	Cufflinks	exon	79715803	79715942	+		NOVEL-U	2608	2725	3665	3153	2891	3014	3234	2728	4	NM_001082647,NM_010582,NM_213903,NM_001130741	1	ENSRNOG00000001066
chr19	Cufflinks	exon	21749163	21749370	-		NOVEL-U	1324	1804	1267	1738	1204	1336	1494	1280	4	NM_001096479,NM_001034723,NM_001173599,NM_001008573	1	ENSRNOG00000015162
chr17	Cufflinks	exon	79708472	79708640	+		NOVEL-U	2533	2449	2962	3424	3052	3632	3439	3181	4	NM_001082647,NM_001045795,NM_213903,NM_001094861	1	ENSRNOG00000001066
chr20	Cufflinks	exon	10951915	10952274	-		NOVEL-U	647	661	648	716	633	943	715	776	4	NM_015790,NM_015790,NM_015790,NM_015790	1	ENSRNOG00000023109
chr3	Cufflinks	exon	14034256	14034461	-		NOVEL-U	976	860	1519	1014	1325	1122	1346	1401	4	NM_001204059,NM_001204059,NM_001001646,NM_010406	3	ENSRNOG00000018899,ENSRNOG00000018899,ENSRNOG00000018899
chr16	Cufflinks	exon	6611389	6615517	-		NOVEL-U	930	627	1179	737	1301	1194	1071	1201	4	NM_022656,NM_007184,NM_001130345,NM_022656	6	ENSRNOG00000018823,ENSRNOG00000018823,ENSRNOG00000018823,ENSRNOG00000018823,ENSRNOG00000018823,ENSRNOG00000018823
chr3	Cufflinks	exon	14051612	14051839	-		NOVEL-U	859	599	1019	789	1208	1004	1002	1097	5	NM_001735,NM_001001646,NM_010406,NM_001166616,NM_001735	0	0
chr19	Cufflinks	exon	21753304	21753446	-		NOVEL-U	736	950	760	940	698	609	775	649	5	NM_001096479,NM_001008573,NM_001034723,NM_001173599,NM_001199220	1	ENSRNOG00000015162
chr1	Cufflinks	exon	246436898	246437064	-		NOVEL-U	511	667	709	635	735	614	681	652	5	NM_213389,NM_139722,NM_067729,NM_100970,NM_001137880	1	ENSRNOG00000013443
chr16	Cufflinks	exon	10354413	10355462	+		NOVEL-U	947	1031	984	883	1208	882	997	999	5	NM_015045,NM_001004436,NM_015045,NM_015045,NM_001199511	1	ENSRNOG00000039630
chr18	Cufflinks	exon	52306029	52306135	-		NOVEL-U	836	897	694	989	950	838	1064	896	5	NM_001094229,NM_001139783,NM_212724,NM_001182,NM_138600	1	ENSRNOG00000014645
chr17	Cufflinks	exon	79713825	79714006	+		NOVEL-U	3338	3269	4280	4283	4186	4096	4608	3833	5	NM_213903,NM_213007,NM_213007,NM_213007,NM_002216	1	ENSRNOG00000001066
chr5	Cufflinks	exon	66189869	66190559	-		NOVEL-U	2132	2439	2079	2624	3104	2738	3350	2750	5	NM_145368,NM_145368,NM_145368,NM_145368,NM_001114841	1	ENSRNOG00000039151
chr16	Cufflinks	exon	81319762	81319925	-		NOVEL-U	610	658	594	905	735	1042	811	811	5	NM_025834,NM_001256134,NM_001168977,NM_001256134,NM_001168977	1	ENSRNOG00000019700
chr17	Cufflinks	exon	79701321	79701483	+		NOVEL-U	1106	1063	1245	1270	1668	1344	1441	1253	5	NM_001130741,NM_213903,NM_001045795,NM_213007,NM_213007	1	ENSRNOG00000001066
chr17	Cufflinks	exon	79709464	79709589	+		NOVEL-U	1603	1906	2166	2244	2655	1829	2383	1984	5	NM_001094861,NM_213903,NM_001082647,NM_002216,NM_213007	3	ENSRNOG00000001066,ENSRNOG00000001066,ENSRNOG00000001066
chr5	Cufflinks	exon	119485731	119485997	+	Dock7	NOVEL-T	6302	6871	5164	8060	6372	4739	7417	5870	6	NM_001011408,NM_001003926,NM_131818,NM_131818,NM_001135122,NM_131818	0	0
chr17	Cufflinks	exon	79718157	79718326	+		NOVEL-U	2541	2339	2948	3231	2715	3325	3430	2816	6	NM_001094861,NM_001082647,NM_010582,NM_001098016,NM_213903,NM_001130741	1	ENSRNOG00000001066
chr18	Cufflinks	exon	52305014	52305087	-		NOVEL-U	1272	1501	1177	1459	1491	910	1428	1405	6	NM_001249884,NM_001139783,NM_001193319,NM_140842,NM_104287,NM_001182	1	ENSRNOG00000014645
chr13	Cufflinks	exon	53002046	53002228	-		NOVEL-U	1038	1307	1178	1165	1464	1241	1241	1144	6	NM_030787,NM_030787,NM_001201550,NM_001201550,NM_030787,NM_001201550	1	ENSRNOG00000033745
chr17	Cufflinks	exon	79723552	79723665	+		NOVEL-U	1775	1461	1343	2112	1660	2013	2012	1755	6	NM_010582,NM_001094861,NM_001045795,NM_001130741,NM_001098016,NM_213903	1	ENSRNOG00000001066
chr19	Cufflinks	exon	21748605	21748795	-		NOVEL-U	2449	2051	1837	2345	1477	2000	1831	1684	6	NM_124075,NM_001176749,NM_001173599,NM_001008573,NM_001034723,NM_001176749	1	ENSRNOG00000015162
chr10	Cufflinks	exon	61942785	61943479	+		NOVEL-U	995	1108	1197	996	1306	1423	1029	1254	6	NM_137251,NM_001081158,NM_066696,NM_066696,NM_066696,NM_137251	1	ENSRNOG00000002669
chr1	Cufflinks	exon	208427760	208428279	-		NOVEL-U	4910	1969	4182	1989	7136	2725	5704	6277	7	NR_002847,NR_002819,NR_002819,NR_002847,NR_002819,NR_002819,NR_002847	0	0
chr3	Cufflinks	exon	14065898	14066095	-		NOVEL-U	715	634	1185	808	1113	1067	973	1164	7	NM_010406,NM_001001646,NM_001735,NM_001243103,NM_001243103,NM_001243103,NM_001204059	1	ENSRNOG00000042661
chr19	Cufflinks	exon	11465931	11466115	+		NOVEL-U	1051	1203	1007	1192	990	1196	1053	1098	7	NM_001045974,NM_001144,NM_001091918,NM_001017083,NM_011787,NM_213163,NM_001091918	1	ENSRNOG00000019444
chr10	Cufflinks	exon	61949586	61949896	+		NOVEL-U	895	754	804	894	818	1038	849	826	7	NM_001081158,NM_001077560,NM_137251,NM_137251,NM_137251,NM_001081158,NM_001077560	2	ENSRNOG00000002669,ENSRNOG00000002669
chr10	Cufflinks	exon	13082414	13083908	+		NOVEL-U	1584	776	2194	1028	1962	2135	2587	1907	7	NM_001244545,NM_016333,NM_016333,NM_016333,NM_016333,NM_175229,NM_016333	2	ENSRNOG00000004478,ENSRNOG00000004478
chr18	Cufflinks	exon	52325343	52325423	-		NOVEL-U	761	907	868	883	948	1082	801	892	8	NM_140842,NM_001249884,NM_001045969,NM_001182,NM_001193319,NM_001193319,NM_140842,NM_001249884	1	ENSRNOG00000014645
chr17	Cufflinks	exon	79694924	79695093	+		NOVEL-U	5258	3885	6394	5970	6197	5821	5063	4916	8	NM_010582,NM_213903,NM_001082647,NM_213903,NM_001094861,NM_001094861,NM_001130741,NM_001130741	1	ENSRNOG00000001066
chr10	Cufflinks	exon	61947842	61948213	+		NOVEL-U	707	796	724	696	737	873	775	803	8	NM_001081158,NM_001079109,NM_001077560,NM_015229,NM_137251,NM_001077560,NM_001081158,NM_001079109	2	ENSRNOG00000002669,ENSRNOG00000002669
chr11	Cufflinks	exon	55887208	55888049	+	Pvrl3	NOVEL-T	1266	1273	1108	1224	1625	1483	1723	1359	8	NM_021495,NM_015480,NM_021495,NM_001243286,NM_001243286,NM_001243286,NM_021495,NM_001243286	3	ENSRNOG00000002176,ENSRNOG00000002176,ENSRNOG00000002176
chr4	Cufflinks	exon	174960077	174960835	+		NOVEL-U	893	1220	849	1246	1111	764	1095	1120	8	NM_001004891,NM_001139835,NM_001004891,NM_015954,NM_172733,NM_001004891,NM_172733,NM_172733	3	ENSRNOG00000007570,ENSRNOG00000007570,ENSRNOG00000007570
chr4	Cufflinks	exon	158608499	158608874	-		NOVEL-U	898	629	1129	792	1320	1240	1108	1040	8	NR_027619,NM_008645,NM_008645,NM_001173061,NM_008645,NR_027619,NM_008646,NM_008645	3	ENSRNOG00000033245,ENSRNOG00000033245,ENSRNOG00000033245
chr1	Cufflinks	exon	208424537	208425836	.		NOVEL-U	9197	2589	10359	2752	13570	5999	7180	11005	9	NR_002847,NR_002819,NR_002819,NR_002819,NR_002819,NR_002819,NR_002819,NR_002819,NR_002819	0	0
chr18	Cufflinks	exon	52324361	52324484	-		NOVEL-U	1573	1403	1198	1681	1558	1340	1666	1408	9	NM_001182,NM_001094229,NM_212724,NM_138600,NM_001045969,NM_104287,NM_001249884,NM_140842,NM_104287	1	ENSRNOG00000014645
chr18	Cufflinks	exon	52305230	52305327	-		NOVEL-U	1397	1319	960	1595	1089	1387	1555	1366	9	NM_001249884,NM_001155654,NM_212724,NM_001094229,NM_001069816,NM_140842,NM_001139783,NM_138600,NM_001182	1	ENSRNOG00000014645
chr3	Cufflinks	exon	170372818	170376499	-		NOVEL-U	1457	836	1399	936	1921	2010	2095	1622	9	NM_033405,NM_183162,NM_033405,NM_033405,NM_033405,NM_033405,NM_033405,NM_033405,NM_033405	1	ENSRNOG00000013267
chr3	Cufflinks	exon	170368825	170370014	-		NOVEL-U	1196	774	1022	837	1426	1438	2108	1290	9	NM_183162,NM_033405,NM_183162,NM_183162,NM_183162,NM_183162,NM_033405,NM_033405,NM_033405	7	ENSRNOG00000013267,ENSRNOG00000013267,ENSRNOG00000013267,ENSRNOG00000013267,ENSRNOG00000013267,ENSRNOG00000013267,ENSRNOG00000013267
chr10	Cufflinks	exon	57915308	57915503	-		NOVEL-U	701	908	945	1118	808	891	1039	1147	10	NM_001253018,NM_001253018,NM_001245290,NM_001253018,NM_001024395,NM_001140715,NM_142296,NM_142296,NM_066189,NM_142296	1	ENSRNOG00000007244
chr1	Cufflinks	exon	76821194	76824343	-		NOVEL-U	1470	1235	1577	1315	1675	1631	1112	1297	10	NM_001091205,NM_001003022,NM_001003022,NM_172739,NM_001091205,NM_001091205,NM_001091205,NM_001091205,NM_001003022,NM_001091205	2	ENSRNOG00000015852,ENSRNOG00000015852
chr14	Cufflinks	exon	45093455	45096801	-		NOVEL-U	893	856	975	851	1118	830	1247	1220	10	NM_018177,NM_018177,NM_018177,NM_018177,NM_018177,NM_018177,NM_001024917,NM_018177,NM_001024917,NM_001024917	3	ENSRNOG00000027152,ENSRNOG00000027152,ENSRNOG00000027152
chr7	Cufflinks	exon	122171904	122173916	+		NOVEL-U	854	3114	713	2005	7029	1649	2027	3463	10	NM_054088,NM_054088,NM_054088,NM_054088,NM_054088,NM_054088,NM_054088,NM_054088,NM_054088,NM_054088	3	ENSRNOG00000022268,ENSRNOG00000022268,ENSRNOG00000022268
chr3	Cufflinks	exon	4582918	4584442	-		NOVEL-U	1663	1574	1610	1468	1879	1640	2000	1918	10	NM_153125,NM_014866,NM_153125,NM_014866,NM_014866,NM_153125,NM_014866,NM_014866,NM_153125,NM_014866	3	ENSRNOG00000019122,ENSRNOG00000019122,ENSRNOG00000019122
chr18	Cufflinks	exon	52300895	52301150	-		NOVEL-U	2276	2536	1907	2723	2158	1895	2747	2327	10	NM_138600,NM_001182,NM_212724,NM_001193319,NM_001182,NM_001094229,NM_212724,NM_001193319,NM_001182,NM_001094229	3	ENSRNOG00000014645,ENSRNOG00000014645,ENSRNOG00000014645
chr2	Cufflinks	exon	142389369	142392363	-		NOVEL-U	1247	1343	1460	1400	1667	1531	1591	1885	10	NM_172501,NM_001135519,NM_172501,NM_001017370,NM_001017370,NM_172501,NM_001017370,NM_001192100,NM_001192100,NM_001192100	3	ENSRNOG00000010843,ENSRNOG00000010843,ENSRNOG00000010843
chr6	Cufflinks	exon	79799974	79801210	+		NOVEL-U	949	955	1011	970	1094	971	776	1045	11	NM_054024,NM_177321,NM_001134678,NM_054024,NM_001134678,NM_054024,NM_177321,NM_177321,NM_177321,NM_001134678,NM_054024	2	ENSRNOG00000038832,ENSRNOG00000038832
chr17	Cufflinks	exon	10778629	10779728	+		NOVEL-U	990	1044	1114	1208	1422	1032	1137	1213	11	NM_001206930,NM_001205752,NM_001185059,NM_153538,NM_001205752,NM_153538,NM_153538,NM_153538,NM_001205752,NM_001185059,NM_001185059	3	ENSRNOG00000016629,ENSRNOG00000016629,ENSRNOG00000016629
chr10	Cufflinks	exon	46469701	46470123	-		NOVEL-U	1055	1122	893	812	1383	1423	1014	968	11	NM_011480,NM_001244003,NM_214157,NM_001005291,NM_001113302,NM_001105129,NM_214157,NM_204126,NM_001195818,NM_001105129,NM_001105129	3	ENSRNOG00000003463,ENSRNOG00000003463,ENSRNOG00000003463
chr2	Cufflinks	exon	189674801	189674926	.		NOVEL-U	1357	1421	950	2193	1048	1034	1359	1699	13	NM_001030274,NM_001030274,NM_001030274,NM_001201034,NM_001071789,NM_001020633,NM_001020633,NM_001071789,NM_001071789,NM_001135319,NM_001165116,NM_001165116,NM_001165116	3	ENSRNOG00000029339,ENSRNOG00000029339,ENSRNOG00000029339
chr18	Cufflinks	exon	30756062	30757878	-		NOVEL-U	1503	1885	1826	1978	1700	2059	1881	2378	14	NM_001079812,NM_001079812,NM_001079812,NM_001079812,NM_001079812,NM_001079812,NM_001079812,NM_001079812,NM_007858,NM_007858,NM_001079812,NM_001079812,NM_007858,NM_001079812	3	ENSRNOG00000019688,ENSRNOG00000019688,ENSRNOG00000019688
chr18	Cufflinks	exon	31118775	31120970	-		NOVEL-U	831	857	1162	941	1130	1663	1251	1649	14	NM_029357,NM_001083655,NM_002587,NM_001083655,NM_001045827,NM_001045827,NM_001136169,NM_001136169,NM_001102705,NM_032420,NM_001045827,NM_001102705,NM_001045827,NM_001045827	3	ENSRNOG00000019462,ENSRNOG00000019462,ENSRNOG00000019462
chr1	Cufflinks	exon	186842895	186848014	+		NOVEL-U	1446	1034	1607	988	1422	1789	1475	1736	15	NM_006662,NM_006662,NM_006662,NM_006662,NM_006662,NM_006662,NM_006662,NM_006662,NM_006662,NM_001256829,NM_001256829,NM_001256829,NM_001256829,NM_001256829,NM_001256829	5	ENSRNOG00000018637,ENSRNOG00000018637,ENSRNOG00000018637,ENSRNOG00000018637,ENSRNOG00000018637
chr17	Cufflinks	exon	57925260	57925396	.		NOVEL-U	804	972	635	1287	794	592	916	1072	16	NM_001010,NM_211925,NM_001172390,NM_001162046,NM_001010,NM_061034,NM_061034,NM_001041275,NM_001041275,NM_001203345,NM_001203345,NM_001085006,NM_001255907,NM_001255907,NM_001203345,NM_001041275	0	0
chr16	Cufflinks	exon	54569706	54571928	+		NOVEL-U	1419	1053	1428	1501	1595	1592	1207	1730	16	NM_001005863,NM_001132456,NM_001001924,NM_001132456,NM_001132456,NM_001005863,NM_001005863,NM_001132456,NM_001132456,NM_001132456,NM_001132456,NM_001132456,NM_001132456,NM_001001924,NM_001132456,NM_001132456	2	ENSRNOG00000010748,ENSRNOG00000010748
chr8	Cufflinks	exon	57856824	57858725	-		NOVEL-U	726	726	674	743	772	915	1177	849	16	NM_172771,NM_015263,NM_015263,NM_172771,NM_001127055,NM_015263,NM_015263,NM_015263,NM_172771,NM_172771,NM_015263,NM_015263,NM_001127055,NM_001127055,NM_172771,NM_001127055	3	ENSRNOG00000009170,ENSRNOG00000009170,ENSRNOG00000009170
chr10	Cufflinks	exon	109516561	109518199	-		NOVEL-U	1415	1862	1575	1866	1412	1569	1708	1696	16	NM_001164800,NM_001164800,NM_001164800,NM_001164800,NM_001037984,NM_001037984,NM_001037984,NM_001164800,NM_001131858,NM_001164800,NM_001131858,NM_001037984,NM_001037984,NM_001164800,NM_024249,NM_001131858	5	ENSRNOG00000004604,ENSRNOG00000004604,ENSRNOG00000004604,ENSRNOG00000004604,ENSRNOG00000004604
chr10	Cufflinks	exon	109516561	109518196	-		NOVEL-U	1413	1862	1575	1866	1409	1569	1708	1696	16	NM_001164800,NM_001164800,NM_001164800,NM_001164800,NM_001037984,NM_001037984,NM_001037984,NM_001164800,NM_001131858,NM_001164800,NM_001131858,NM_001037984,NM_001037984,NM_001164800,NM_024249,NM_001131858	5	ENSRNOG00000004604,ENSRNOG00000004604,ENSRNOG00000004604,ENSRNOG00000004604,ENSRNOG00000004604
chrX	Cufflinks	exon	117405924	117410740	+		NOVEL-U	1152	946	1184	1060	1563	1084	1373	1203	18	NM_172493,NM_006729,NM_172493,NM_172493,NM_172493,NM_006729,NM_006729,NM_006729,NM_006729,NM_172493,NM_006729,NM_172493,NM_006729,NM_172493,NM_172493,NM_172493,NM_172493,NM_172493	0	0
chr10	Cufflinks	exon	85584267	85585277	-		NOVEL-U	631	907	723	1077	994	714	956	927	18	NM_001261099,NM_001030756,NM_001102515,NM_001261099,NM_001130450,NM_001086544,NM_001086544,NM_212855,NM_212855,NM_001261099,NM_212855,NM_001261099,NM_001130450,NM_003204,NM_001261099,NM_001130450,NM_001261099,NM_001132347	3	ENSRNOG00000008830,ENSRNOG00000008830,ENSRNOG00000008830
chr8	Cufflinks	exon	20865616	20867789	-		NOVEL-U	1054	863	782	1124	1347	1089	1483	1022	19	NM_145611,NM_001136191,NM_001076531,NM_145611,NM_001076531,NM_145611,NM_145611,NM_145611,NM_001076531,NM_001136191,NM_001136191,NM_145611,NM_001136191,NM_145611,NM_001136191,NM_145611,NM_001076531,NM_001076531,NM_001076531	3	ENSRNOG00000010643,ENSRNOG00000010643,ENSRNOG00000010643
chr3	Cufflinks	exon	4611521	4614048	-		NOVEL-U	1061	751	1416	830	1240	1271	716	1109	19	NM_153125,NM_153125,NM_014866,NM_001096350,NM_014866,NM_001096350,NM_001096350,NM_014866,NM_001096350,NM_001096350,NM_014866,NM_001096350,NM_001096350,NM_014866,NM_014866,NM_014866,NM_014866,NM_014866,NM_014866	3	ENSRNOG00000019122,ENSRNOG00000019122,ENSRNOG00000019122
chr5	Cufflinks	exon	127497977	127500372	+		NOVEL-U	1707	1676	1765	1842	1843	1688	1928	1909	19	NM_015306,NM_015306,NM_183225,NM_015306,NM_015306,NM_015306,NM_015306,NM_015306,NM_015306,NM_015306,NM_015306,NM_183225,NM_183225,NM_183225,NM_015306,NM_015306,NM_015306,NM_015306,NM_015306	4	ENSRNOG00000005802,ENSRNOG00000005802,ENSRNOG00000005802,ENSRNOG00000005802
chrX	Cufflinks	exon	93982558	93985586	-		NOVEL-U	1409	859	921	864	1401	727	1117	1019	19	NM_000489,NM_009530,NM_000489,NM_001009018,NM_000489,NM_000489,NM_001009018,NM_009530,NM_000489,NM_009530,NM_000489,NM_001009018,NM_009530,NM_000489,NM_000489,NM_009530,NM_200653,NM_200653,NM_200653	8	ENSRNOG00000002550,ENSRNOG00000002550,ENSRNOG00000002550,ENSRNOG00000002550,ENSRNOG00000002550,ENSRNOG00000002550,ENSRNOG00000002550,ENSRNOG00000002550
chr19	Cufflinks	exon	53215122	53221627	-		NOVEL-U	3151	2413	2892	2417	3140	2723	3415	3409	19	NM_001256182,NR_037865,NM_001256182,NM_001256182,NM_001256182,NM_001256182,NM_001256182,NR_037865,NM_001256182,NR_037865,NM_001092091,NM_001092091,NM_001092091,NM_001256182,NM_001092091,NR_037865,NM_001256182,NM_001092091,NM_001092091	11	ENSRNOG00000027906,ENSRNOG00000027906,ENSRNOG00000027906,ENSRNOG00000027906,ENSRNOG00000027906,ENSRNOG00000027906,ENSRNOG00000027906,ENSRNOG00000027906,ENSRNOG00000027906,ENSRNOG00000027906,ENSRNOG00000027906
chr4	Cufflinks	exon	66840767	66842131	-		NOVEL-U	678	670	613	714	763	770	844	818	21	NM_207113,NM_028123,NM_001075284,NM_207113,NM_001075284,NM_028123,NM_028123,NM_028123,NM_207113,NM_207113,NM_207113,NM_032295,NM_207113,NM_032295,NM_207113,NM_001075284,NM_207113,NM_207113,NM_001012538,NM_001012538,NM_001012538	3	ENSRNOG00000008725,ENSRNOG00000008725,ENSRNOG00000008725
chr6	Cufflinks	exon	138385651	138386162	.		NOVEL-U	796	916	1005	1030	924	692	806	781	22	NM_001003294,NM_214062,NM_001135443,NM_001003294,NM_001003294,NM_001135443,NM_001087425,NM_001087425,NM_001043589,NM_001043589,NM_140760,NM_140760,NM_001250835,NM_212195,NM_001250835,NM_001018930,NM_001018930,NM_001196389,NM_001196389,NM_214062,NM_001003294,NM_001003294	3	ENSRNOG00000027874,ENSRNOG00000027874,ENSRNOG00000027874
chr12	Cufflinks	exon	46564207	46566485	-	Ankle2	NOVEL-T	936	963	946	983	1227	938	1193	1266	22	NM_001253814,NM_001253814,NM_001253814,NM_015114,NM_015114,NM_015114,NM_001253814,NM_001253814,NM_001253814,NM_001253814,NM_001253814,NM_015114,NM_015114,NM_001253814,NM_001253814,NM_015114,NM_015114,NM_001126395,NM_001126395,NM_015114,NM_001126395,NM_015114	3	ENSRNOG00000037441,ENSRNOG00000037441,ENSRNOG00000037441
chr6	Cufflinks	exon	63671595	63672720	+		NOVEL-U	972	1064	1110	1148	1228	852	1092	1064	22	NM_026164,NM_001256007,NM_001256007,NM_001171272,NM_001256009,NM_001256009,NM_001171272,NM_001256009,NM_026164,NM_001256011,NM_001256010,NM_001131466,NM_001131466,NM_001256010,NM_001256010,NM_001256010,NM_001131466,NM_001171272,NM_001130737,NM_001130737,NM_001256010,NM_001130737	3	ENSRNOG00000039091,ENSRNOG00000039091,ENSRNOG00000039091
chr3	Cufflinks	exon	55841609	55843538	+		NOVEL-U	1170	1038	926	998	977	982	1026	1086	22	NM_001075547,NM_001075547,NM_001193528,NM_001193528,NM_029022,NM_029022,NM_001257341,NM_001257341,NM_001257341,NM_001193528,NM_001075547,NM_029022,NM_029022,NM_001193528,NM_001193528,NM_029022,NM_029022,NM_029022,NM_029022,NM_029022,NM_029022,NM_029022	3	ENSRNOG00000018657,ENSRNOG00000018657,ENSRNOG00000018657
chrX	Cufflinks	exon	145744466	145746598	-		NOVEL-U	2686	2845	3111	3549	3778	2764	3646	3492	22	NM_001001798,NM_001010986,NM_001010986,NM_001001798,NM_001010986,NM_001010986,NM_001010986,NM_001010986,NM_001010986,NM_001010986,NM_001010986,NM_001010986,NM_001001798,NM_001010986,NM_001010986,NM_001010986,NM_001010986,NM_001010986,NM_001010986,NM_001010986,NM_001001798,NM_001001798	3	ENSRNOG00000003472,ENSRNOG00000003472,ENSRNOG00000003472
chr10	Cufflinks	exon	46490111	46493296	-		NOVEL-U	846	785	891	711	824	905	779	979	23	NM_001039092,NM_001082968,NM_001082968,NM_001082968,NM_001082968,NM_001039092,NM_001039092,NM_001039092,NM_001082968,NM_001082968,NM_001039092,NM_001039092,NM_001082968,NM_001260762,NM_001260762,NM_001093949,NM_001260762,NM_001016770,NM_001093257,NM_001016770,NM_001260762,NM_001093949,NM_001016770	3	ENSRNOG00000003590,ENSRNOG00000003590,ENSRNOG00000003590
chr3	Cufflinks	exon	4610402	4614048	-		NOVEL-U	1465	1025	1968	1094	1637	1766	973	1519	23	NM_014866,NM_153125,NM_153125,NM_014866,NM_014866,NM_014866,NM_014866,NM_001096350,NM_014866,NM_001096350,NM_001096350,NM_014866,NM_001096350,NM_001096350,NM_014866,NM_001096350,NM_001096350,NM_014866,NM_014866,NM_014866,NM_014866,NM_014866,NM_014866	4	ENSRNOG00000019122,ENSRNOG00000019122,ENSRNOG00000019122,ENSRNOG00000019122
chr7	Cufflinks	exon	22331691	22333661	-		NOVEL-U	1869	1988	1861	2224	2534	1614	2266	2270	24	NM_001033375,NM_015275,NM_001033375,NM_015275,NM_015275,NM_015275,NM_001033375,NM_015275,NM_015275,NM_001033375,NM_015275,NM_015275,NM_001033375,NM_015275,NM_015275,NM_001033375,NM_015275,NM_001033375,NM_015275,NM_001033375,NM_001033375,NM_001033375,NM_015275,NM_001033375	3	ENSRNOG00000008331,ENSRNOG00000008331,ENSRNOG00000008331
chr10	Cufflinks	exon	104595970	104597819	+		NOVEL-U	2316	1987	1657	2095	2732	2294	2786	2782	24	NM_001105626,NM_052869,NM_001105626,NM_052869,NM_053273,NM_053273,NM_001105626,NM_052869,NM_053273,NM_052869,NM_053273,NM_052869,NM_053273,NM_053273,NM_052869,NM_052869,NM_053273,NM_053273,NM_052869,NM_053273,NM_053273,NM_053273,NM_052869,NM_052869	3	ENSRNOG00000024578,ENSRNOG00000024578,ENSRNOG00000024578
chr10	Cufflinks	exon	95938718	95940368	+		NOVEL-U	1094	1097	1005	1120	1210	1409	1116	1143	24	NM_018469,NM_001101970,NM_198292,NM_018469,NM_018469,NM_001101970,NM_198292,NM_001201327,NM_001201327,NM_001201327,NM_001099252,NM_001099252,NM_001201327,NM_001099252,NM_001201327,NM_001099252,NM_001201328,NM_001201328,NM_001201328,NM_001099252,NM_001201327,NM_018469,NM_001101970,NM_001099252	4	ENSRNOG00000013659,ENSRNOG00000013659,ENSRNOG00000013659,ENSRNOG00000013659
chr5	Cufflinks	exon	150780619	150782964	-		NOVEL-U	1551	1907	1606	2084	1304	1366	1582	1374	25	NM_001128607,NM_001166007,NM_001003682,NM_001128607,NM_001166007,NM_001003682,NM_001128607,NM_001166007,NM_001128607,NM_001128607,NM_001166007,NM_001128607,NM_001166007,NM_001128607,NM_001128607,NM_001128607,NM_001166007,NM_001166007,NM_001166007,NM_001128607,NM_001166007,NM_001166007,NM_001166007,NM_001166007,NM_001003362	1	ENSRNOG00000010037
chr9	Cufflinks	exon	97173623	97175346	+		NOVEL-U	1375	1165	1197	1289	1512	1305	1548	1482	25	NM_173760,NM_173760,NM_015216,NM_015216,NM_173760,NM_173760,NM_173760,NM_173760,NM_001191152,NM_015216,NM_001191152,NM_015216,NM_001191152,NM_001191152,NM_001191152,NM_015216,NM_173760,NM_015216,NM_015216,NM_015216,NM_015216,NM_173760,NM_001191152,NM_015216,NM_001191152	3	ENSRNOG00000011613,ENSRNOG00000011613,ENSRNOG00000011613
chr12	Cufflinks	exon	44559463	44563572	+		NOVEL-U	2567	2995	3024	2621	3517	3069	2534	4274	26	NM_172884,NM_172884,NM_172884,NM_172884,NM_172884,NM_172884,NM_172884,NM_172884,NM_172884,NM_172884,NM_172884,NM_172884,NM_172884,NM_172884,NM_172884,NM_172884,NM_172884,NM_172884,NM_172884,NM_172884,NM_172884,NM_172884,NM_172884,NM_172884,NM_172884,NM_172884	1	ENSRNOG00000000711
chr12	Cufflinks	exon	44559463	44563586	+		NOVEL-U	2567	2995	3024	2621	3517	3069	2534	4274	26	NM_172884,NM_172884,NM_172884,NM_172884,NM_172884,NM_172884,NM_172884,NM_172884,NM_172884,NM_172884,NM_172884,NM_172884,NM_172884,NM_172884,NM_172884,NM_172884,NM_172884,NM_172884,NM_172884,NM_172884,NM_172884,NM_172884,NM_172884,NM_172884,NM_172884,NM_172884	1	ENSRNOG00000000711
chr17	Cufflinks	exon	10938408	10940645	+		NOVEL-U	616	687	607	745	674	655	810	709	26	NM_001192463,NM_001192463,NM_001035122,NM_001035122,NM_016548,NM_016548,NM_016548,NM_001192463,NM_001035122,NM_001035122,NM_001035122,NM_001035122,NM_001035122,NM_001035122,NM_001035122,NM_001035122,NM_001035122,NM_001035122,NM_001035122,NM_001035122,NM_001035122,NM_001035122,NM_001035122,NM_001035122,NM_001035122,NM_001035122	3	ENSRNOG00000018400,ENSRNOG00000018400,ENSRNOG00000018400
chr14	Cufflinks	exon	72955775	72959780	-		NOVEL-U	2039	1753	1935	2266	3349	2190	2711	2550	26	NM_001177381,NM_001177379,NM_001185049,NM_001185049,NM_001177381,NM_001185049,NM_001177381,NM_001177379,NM_001177381,NM_001185049,NM_001177381,NM_001185049,NM_001177381,NM_001185049,NM_001185049,NM_001185049,NM_001185049,NM_001177381,NM_001185049,NM_001185049,NM_001177381,NM_001185049,NM_001185049,NM_200981,NM_001185049,NM_200981	3	ENSRNOG00000005043,ENSRNOG00000005043,ENSRNOG00000005043
chr13	Cufflinks	exon	46215211	46218913	+		NOVEL-U	744	728	830	678	773	688	1105	916	27	NM_014935,NM_182930,NM_182930,NM_014935,NM_014935,NM_014935,NM_182930,NM_014935,NM_182930,NM_014935,NM_182930,NM_014935,NM_014935,NM_014935,NM_182930,NM_014935,NM_014935,NM_014935,NM_014935,NM_014935,NM_182930,NM_182930,NM_014935,NM_182930,NM_014935,NM_014935,NM_182930	2	ENSRNOG00000002907,ENSRNOG00000039652
chr7	Cufflinks	exon	117961748	117963231	-		NOVEL-U	1176	1614	1749	1596	1430	1178	1770	2123	27	NM_015374,NM_001205346,NM_001102319,NM_001102319,NM_015374,NM_001205346,NM_015374,NM_001102319,NM_015374,NM_001102319,NM_001205346,NM_015374,NM_001205346,NM_015374,NM_001102319,NM_001205346,NM_001102319,NM_001102319,NM_015374,NM_001205346,NM_001205346,NM_001102319,NM_015374,NM_001205346,NM_001102319,NM_001102319,NM_001205346	3	ENSRNOG00000015177,ENSRNOG00000015177,ENSRNOG00000015177
chrX	Cufflinks	exon	40043145	40044089	.		NOVEL-U	1588	1693	1523	1730	1796	1636	1849	1752	27	NM_016802,NM_001244437,NM_176645,NM_001131283,NM_001664,NM_016802,NM_001131283,NM_001664,NM_001244437,NM_001131283,NM_001131283,NM_176645,NM_001003273,NM_001131283,NM_001131283,NM_001244437,NM_016802,NM_001019998,NM_001019998,NM_001003273,NM_001019998,NM_209012,NM_209012,NM_209012,NM_209012,NM_001019998,NM_001131283	3	ENSRNOG00000002491,ENSRNOG00000002491,ENSRNOG00000002491
chr5	Cufflinks	exon	172676760	172677913	+		NOVEL-U	1522	1015	2097	1037	2052	1940	2838	2626	27	NM_204470,NM_204470,NM_001030452,NM_030937,NM_207678,NM_001034650,NM_207678,NM_001030452,NM_030937,NM_030937,NM_001030452,NM_001030452,NM_001096474,NM_001096474,NM_001030452,NM_001096474,NM_207678,NM_001034650,NM_030937,NM_001096474,NM_030937,NM_001034650,NM_030937,NM_001034650,NM_204470,NM_001034650,NM_207678	5	ENSRNOG00000018691,ENSRNOG00000018691,ENSRNOG00000018691,ENSRNOG00000018691,ENSRNOG00000018691
chr4	Cufflinks	exon	105654316	105658331	+		NOVEL-U	1443	1707	1676	1692	1643	1836	1935	2019	28	NM_001193859,NM_001193859,NM_001013649,NM_026696,NM_001193859,NM_001193859,NM_001013649,NM_001193859,NM_001013649,NM_026696,NM_026696,NM_026696,NM_001193859,NM_001013649,NM_001013649,NM_026696,NM_026696,NM_026696,NM_026696,NM_026696,NM_026696,NM_026696,NM_026696,NM_026696,NM_026696,NM_026696,NM_026696,NM_026696	4	ENSRNOG00000011713,ENSRNOG00000011713,ENSRNOG00000011713,ENSRNOG00000010930
chr6	Cufflinks	exon	132479557	132480822	-		NOVEL-U	1546	1906	1592	2018	1527	1505	1926	1955	29	NM_028262,NM_032233,NM_001260871,NM_028262,NM_001260871,NM_032233,NM_001260871,NM_032233,NM_001260871,NM_028262,NM_028262,NM_001260871,NM_032233,NM_032233,NM_028262,NM_028262,NM_001260871,NM_001260871,NM_001260871,NM_032233,NM_032233,NM_032233,NM_200054,NM_200054,NM_200054,NM_001006486,NM_001006486,NM_001006486,NM_200054	3	ENSRNOG00000006587,ENSRNOG00000006587,ENSRNOG00000006587
chr17	Cufflinks	exon	61356934	61360616	-		NOVEL-U	922	627	953	883	1286	1113	882	1050	29	NM_001081963,NM_001082474,NM_001082474,NM_020848,NM_020848,NM_001082474,NM_001082474,NM_020848,NM_001081963,NM_020848,NM_020848,NM_020848,NM_001082474,NM_001082474,NM_020848,NM_001082474,NM_001082474,NM_020848,NM_020848,NM_001082474,NM_020848,NM_001082474,NM_020848,NM_001082474,NM_001082474,NM_020848,NM_001081963,NM_001082474,NM_020848	4	ENSRNOG00000027938,ENSRNOG00000027938,ENSRNOG00000027938,ENSRNOG00000027938
chr16	Cufflinks	exon	31932422	31934524	+		NOVEL-U	1634	1962	2145	2256	1875	2148	2130	2826	30	NM_001166110,NM_001166110,NM_001166110,NM_001166110,NM_001166110,NM_001166110,NM_001166109,NM_001166110,NM_001166110,NM_001166110,NM_001166110,NM_001166110,NM_001166110,NM_001166110,NM_001166110,NM_001166110,NM_001166110,NM_001166109,NM_001166110,NM_001166110,NM_001166110,NM_001166110,NM_001166110,NM_001166110,NM_001166110,NM_001166110,NM_001166110,NM_001166110,NM_001166110,NM_001166110	3	ENSRNOG00000010107,ENSRNOG00000010107,ENSRNOG00000010107
chr1	Cufflinks	exon	156173194	156174987	-		NOVEL-U	573	657	680	659	587	692	635	699	30	NM_003369,NM_178635,NM_003369,NM_178635,NM_003369,NM_178635,NM_003369,NM_003369,NM_003369,NM_003369,NM_003369,NM_178635,NM_003369,NM_003369,NM_178635,NM_003369,NM_003369,NM_003369,NM_178635,NM_001030839,NM_001030839,NM_201069,NM_001096777,NM_001193026,NM_201069,NM_001096777,NM_001030839,NM_001193026,NM_001030839,NM_001096777	3	ENSRNOG00000016206,ENSRNOG00000016206,ENSRNOG00000016206
chrX	Cufflinks	exon	53083578	53089175	+		NOVEL-U	707	944	891	844	1068	798	1069	1051	31	NM_001080975,NM_001080975,NM_178256,NM_001080975,NM_178256,NM_178256,NM_001080975,NM_178256,NM_001080975,NM_001080975,NM_001080975,NM_178256,NM_001080975,NM_178256,NM_001080975,NM_178256,NM_178256,NM_001080975,NM_001080975,NM_001080975,NM_178256,NM_001080975,NM_001080975,NM_001080975,NM_178256,NM_001080975,NM_001080975,NM_001080975,NM_001080975,NM_001080975,NM_178256	3	ENSRNOG00000026846,ENSRNOG00000026846,ENSRNOG00000026846
chr1	Cufflinks	exon	246411940	246415248	-		NOVEL-U	5129	5769	4880	6306	6534	3876	6277	6219	31	NM_133352,NM_001193217,NM_020123,NM_133352,NM_133352,NM_020123,NM_020123,NM_133352,NM_133352,NM_133352,NM_001193217,NM_133352,NM_020123,NM_133352,NM_133352,NM_133352,NM_001193217,NM_020123,NM_001193217,NM_020123,NM_001193217,NM_020123,NM_001193217,NM_133352,NM_020123,NM_020123,NM_001193217,NM_001141728,NM_213389,NM_213389,NM_213389	7	ENSRNOG00000043247,ENSRNOG00000043247,ENSRNOG00000043247,ENSRNOG00000043247,ENSRNOG00000013443,ENSRNOG00000013443,ENSRNOG00000013443
chr2	Cufflinks	exon	218923202	218924832	+		NOVEL-U	775	825	801	690	696	672	747	770	32	NM_153806,NM_153806,NM_001243674,NM_014597,NM_014597,NM_153806,NM_001075506,NM_001243674,NM_014597,NM_001075506,NM_014597,NM_001243674,NM_014597,NM_014597,NM_153806,NM_014597,NM_014597,NM_001075506,NM_001243674,NM_014597,NM_001243674,NM_001075506,NM_001243674,NM_001243674,NM_001075506,NM_014597,NM_001243674,NM_001243674,NM_001075506,NM_014597,NM_153806,NM_001243674	2	ENSRNOG00000025025,ENSRNOG00000025025
chr3	Cufflinks	exon	53335998	53341708	+		NOVEL-U	963	863	989	1001	1013	1033	1030	1008	32	NM_001164821,NM_001191489,NM_001164821,NM_001165980,NM_001165981,NM_001164821,NM_001191489,NM_001165980,NM_001164821,NM_001165980,NM_001165980,NM_001164821,NM_001165980,NM_001165980,NM_001164821,NM_001165980,NM_001164821,NM_001165980,NM_001165980,NM_001165980,NM_001165980,NM_001165980,NM_001165980,NM_001164821,NM_001165980,NM_001165980,NM_001165980,NM_001165980,NM_001165980,NM_001165980,NM_001165…	3	ENSRNOG00000009403,ENSRNOG00000009403,ENSRNOG00000009403
chr8	Cufflinks	exon	5869308	5872217	-		NOVEL-U	1538	1362	1319	1765	1768	1502	2001	2379	32	NM_027823,NM_027823,NM_027823,NM_152432,NM_027823,NM_027823,NM_027823,NM_152432,NM_027823,NM_027823,NM_152432,NM_027823,NM_027823,NM_027823,NM_152432,NM_027823,NM_152432,NM_152432,NM_027823,NM_152432,NM_027823,NM_152432,NM_152432,NM_001126773,NM_001126773,NM_001202443,NM_001045250,NM_001202443,NM_001093142,NM_001045250,NM_001202443,NM_001093142	3	ENSRNOG00000026821,ENSRNOG00000026821,ENSRNOG00000026821
chr10	Cufflinks	exon	48479301	48481795	-		NOVEL-U	1620	1446	1498	1818	1987	1592	2197	1912	33	NM_028360,NM_028360,NM_028360,NM_028360,NM_029704,NM_001252313,NM_001252313,NM_001252313,NM_001252313,NM_001252313,NM_001252313,NM_001190440,NM_001252313,NM_001252313,NM_001190440,NM_001193059,NM_001193059,NM_001032342,NM_001190440,NM_001193059,NM_001190440,NM_001252313,NM_001252313,NM_200276,NM_001088756,NM_001032342,NM_001193059,NM_200276,NM_001088756,NM_001252313,NM_001193059,NM_200276,NM_0010…	4	ENSRNOG00000002277,ENSRNOG00000002277,ENSRNOG00000002277,ENSRNOG00000002277
chr19	Cufflinks	exon	17110785	17114165	-		NOVEL-U	1265	1017	1287	873	1681	1035	1647	1404	34	NM_025134,NM_001205650,NM_177224,NM_025134,NM_177224,NM_001205650,NM_001205650,NM_001205650,NM_177224,NM_177224,NM_025134,NM_001205650,NM_001205650,NM_025134,NM_025134,NM_025134,NM_025134,NM_001205650,NM_025134,NM_001205650,NM_025134,NM_001205650,NM_001205650,NM_001205650,NM_001205650,NM_025134,NM_001205650,NM_177224,NM_001205650,NM_025134,NM_001205650,NM_001205650,NM_001205650,NM_177224	3	ENSRNOG00000013307,ENSRNOG00000013307,ENSRNOG00000013307
chr19	Cufflinks	exon	17110776	17114165	-		NOVEL-U	1265	1017	1287	873	1681	1035	1647	1404	34	NM_025134,NM_001205650,NM_177224,NM_025134,NM_177224,NM_001205650,NM_001205650,NM_001205650,NM_177224,NM_177224,NM_025134,NM_001205650,NM_001205650,NM_025134,NM_025134,NM_025134,NM_025134,NM_001205650,NM_025134,NM_001205650,NM_025134,NM_001205650,NM_001205650,NM_001205650,NM_001205650,NM_025134,NM_001205650,NM_177224,NM_001205650,NM_025134,NM_001205650,NM_001205650,NM_001205650,NM_177224	3	ENSRNOG00000013307,ENSRNOG00000013307,ENSRNOG00000013307
chr1	Cufflinks	exon	245417169	245420250	-		NOVEL-U	2601	2484	3141	2882	2454	2224	3428	3561	35	NM_001034955,NM_001034964,NM_001034955,NM_001034964,NM_001034955,NM_001034964,NM_001034955,NM_001034964,NM_001034955,NM_001034955,NM_001034964,NM_001034964,NM_001034955,NM_001034964,NM_001034964,NM_001034955,NM_001131593,NM_001034964,NM_001034955,NM_001034955,NM_001034964,NM_001034964,NM_001034955,NM_001131593,NM_001034955,NM_001034955,NM_001034955,NM_001034954,NM_001075169,NM_001034964,NM_001034…	3	ENSRNOG00000015658,ENSRNOG00000015658,ENSRNOG00000015658
chr1	Cufflinks	exon	245417171	245420250	-		NOVEL-U	2601	2484	3141	2882	2454	2224	3428	3561	35	NM_001034955,NM_001034964,NM_001034955,NM_001034964,NM_001034955,NM_001034964,NM_001034955,NM_001034964,NM_001034955,NM_001034955,NM_001034964,NM_001034964,NM_001034955,NM_001034964,NM_001034964,NM_001034955,NM_001131593,NM_001034964,NM_001034955,NM_001034955,NM_001034964,NM_001034964,NM_001034955,NM_001131593,NM_001034955,NM_001034955,NM_001034955,NM_001034954,NM_001075169,NM_001034964,NM_001034…	3	ENSRNOG00000015658,ENSRNOG00000015658,ENSRNOG00000015658
chr13	Cufflinks	exon	72000896	72005846	-		NOVEL-U	1592	1705	2031	2275	2067	1842	2205	2934	36	NR_027640,NR_027640,NR_027640,NR_027640,NR_027640,NR_027640,NR_027640,NR_027640,NR_027640,NR_027640,NR_027640,NR_027640,NR_027640,NR_027640,NR_027640,NR_027640,NR_027640,NR_027640,NR_027640,NR_027640,NM_152663,NM_001191426,NM_152663,NR_027640,NM_001191426,NR_027640,NM_001191426,NM_152663,NM_001006532,NM_001191426,NM_001006532,NM_001191426,NM_001191426,NM_152663,NM_001191426,NM_001191426	3	ENSRNOG00000004736,ENSRNOG00000004736,ENSRNOG00000004736
chr13	Cufflinks	exon	72000895	72005846	-		NOVEL-U	1592	1705	2031	2275	2067	1842	2205	2934	36	NR_027640,NR_027640,NR_027640,NR_027640,NR_027640,NR_027640,NR_027640,NR_027640,NR_027640,NR_027640,NR_027640,NR_027640,NR_027640,NR_027640,NR_027640,NR_027640,NR_027640,NR_027640,NR_027640,NR_027640,NM_152663,NM_001191426,NM_152663,NR_027640,NM_001191426,NR_027640,NM_001191426,NM_152663,NM_001006532,NM_001191426,NM_001006532,NM_001191426,NM_001191426,NM_152663,NM_001191426,NM_001191426	3	ENSRNOG00000004736,ENSRNOG00000004736,ENSRNOG00000004736
chr15	Cufflinks	exon	51069029	51070661	-		NOVEL-U	883	945	911	1259	1049	946	1309	1139	37	NM_023045,NM_015024,NM_001135305,NM_001128230,NM_001135305,NM_015024,NM_023045,NM_001135305,NM_001102542,NM_015024,NM_001135305,NM_015024,NM_001102542,NM_001135305,NM_015024,NM_001102542,NM_001135305,NM_001135305,NM_001102542,NM_001102542,NM_001102542,NM_001012942,NM_001128230,NM_001128230,NM_001102542,NM_023045,NM_001135305,NM_001132470,NM_001132470,NM_001135305,NM_001095876,NM_001102542,NM_0010…	6	ENSRNOG00000013288,ENSRNOG00000013288,ENSRNOG00000013288,ENSRNOG00000013288,ENSRNOG00000013288,ENSRNOG00000013288
chr11	Cufflinks	exon	79580813	79583185	+	Masp1	NOVEL-T	2797	2239	4119	2300	3436	3353	4663	4429	38	NM_001076968,NM_001076968,NM_001088873,NM_213586,NM_213586,NM_001184947,NM_001184947,NM_001088871,NM_001160478,NM_139125,NR_033519,NM_001163648,NM_001088873,NM_001088873,NM_001160478,NM_001160478,NM_001160478,NM_137222,NM_137222,NM_001163648,NM_001122858,NM_001085651,NM_001160478,NM_213587,NM_213587,NM_001085651,NM_001085651,NM_001122858,NM_001122858,NM_213587,NM_213586,NM_001122858,NM_001184947,…	3	ENSRNOG00000001827,ENSRNOG00000001827,ENSRNOG00000001827
chr5	Cufflinks	exon	12360504	12363643	-		NOVEL-U	2978	3015	2698	3137	3799	2380	3632	3168	38	NM_183028,NM_183028,NM_183028,NM_183028,NM_001132519,NM_001081526,NM_052937,NM_183028,NM_183028,NM_001132519,NM_001132519,NM_052937,NM_001081526,NM_001132519,NM_001081526,NM_001132519,NM_001132519,NM_001081526,NM_001132519,NM_001260718,NM_001132519,NM_001260718,NM_001173825,NM_001031019,NM_001081526,NM_001260718,NM_001094240,NM_001030067,NM_001173825,NM_001094240,NM_001030067,NM_001031019,NM_0012…	7	ENSRNOG00000005730,ENSRNOG00000005730,ENSRNOG00000005730,ENSRNOG00000005730,ENSRNOG00000005730,ENSRNOG00000005730,ENSRNOG00000005730
chr6	Cufflinks	exon	22286559	22290112	-		NOVEL-U	1161	1346	1509	1548	1183	1260	1334	1421	39	NM_001081071,NM_001002257,NM_001081071,NM_001081071,NM_001081071,NM_001002257,NM_001081071,NM_001081071,NM_001081071,NM_001081071,NM_001081071,NM_001081071,NM_001081071,NM_001177967,NM_001002257,NM_001081071,NM_001081071,NM_001081071,NM_001081071,NM_001081071,NM_001002257,NM_001081071,NM_001081071,NM_001081071,NM_001002257,NM_001142845,NM_001142845,NM_001142845,NM_001142045,NM_001142045,NM_001142…	3	ENSRNOG00000034026,ENSRNOG00000034026,ENSRNOG00000034026
chr4	Cufflinks	exon	67110986	67121758	-		NOVEL-U	1036	753	930	692	1236	866	930	1139	39	NM_139294,NM_139294,NM_139294,NM_139294,NM_139294,NM_139294,NM_139294,NM_139294,NM_139294,NM_139294,NM_139294,NM_139294,NM_139294,NM_139294,NM_139294,NM_139294,NM_139294,NM_139294,NM_139294,NM_139294,NM_139294,NM_139294,NM_139294,NM_139294,NM_139294,NM_004333,NM_004333,NM_004333,NM_205302,NM_205302,NM_004333,NM_205302,NM_001093975,NM_001093975,NM_001093975,NM_139294,NM_080308,NM_080308,NM_080308	4	ENSRNOG00000010957,ENSRNOG00000010957,ENSRNOG00000010957,ENSRNOG00000010957
chr3	Cufflinks	exon	149211613	149215392	+		NOVEL-U	719	715	782	755	691	679	761	915	41	NM_020336,NM_020336,NM_001103468,NM_001103468,NM_177658,NM_177658,NM_001030846,NM_001030846,NM_001103468,NM_001030846,NM_020336,NM_177658,NM_020336,NM_020336,NM_020336,NM_177658,NM_020336,NM_177658,NM_020336,NM_020336,NM_177658,NM_177658,NM_020336,NM_177658,NM_177658,NM_177658,NM_020336,NM_177658,NM_177658,NM_177658,NM_020336,NM_177658,NM_177658,NM_177658,NM_177658,NM_177658,NM_177658,NM_177658,N…	3	ENSRNOG00000014836,ENSRNOG00000014836,ENSRNOG00000014836
chr17	Cufflinks	exon	14963447	14966898	-		NOVEL-U	1278	1056	1071	1312	1257	1114	1428	1164	48	NM_181278,NM_001135586,NM_001133606,NM_001135586,NM_001135586,NM_001135586,NM_001133606,NM_001133606,NM_001135586,NM_001133606,NM_001135586,NM_001133606,NM_001135586,NM_001135586,NM_001135586,NM_181278,NM_001135586,NM_001133606,NM_001133606,NM_001135586,NM_001135586,NM_001133606,NM_001133606,NM_001133606,NM_181278,NM_001133606,NM_001133606,NM_001135586,NM_181278,NM_001133606,NM_001135586,NM_18127…	0	0
chr10	Cufflinks	exon	13075125	13081702	+		NOVEL-U	10619	4898	13471	5066	12837	13450	10162	11975	50	NM_016333,NM_001244545,NM_175229,NM_001244545,NM_001244545,NM_016333,NM_016333,NM_016333,NM_016333,NM_001244545,NM_016333,NM_001244545,NM_016333,NM_001244545,NM_016333,NM_001244545,NM_001244545,NM_016333,NM_001244545,NM_001244545,NM_016333,NM_001244545,NM_001244545,NM_001244545,NM_016333,NM_016333,NM_001244545,NM_001244545,NM_016333,NM_001244545,NM_016333,NM_001244545,NM_016333,NM_001244545,NM_00…	3	ENSRNOG00000004478,ENSRNOG00000004478,ENSRNOG00000004478
chr10	Cufflinks	exon	13075122	13081702	+		NOVEL-U	10620	4898	13471	5066	12837	13450	10162	11975	50	NM_016333,NM_001244545,NM_175229,NM_001244545,NM_001244545,NM_016333,NM_016333,NM_016333,NM_016333,NM_001244545,NM_016333,NM_001244545,NM_016333,NM_001244545,NM_016333,NM_001244545,NM_001244545,NM_016333,NM_001244545,NM_001244545,NM_016333,NM_001244545,NM_001244545,NM_001244545,NM_016333,NM_016333,NM_001244545,NM_001244545,NM_016333,NM_001244545,NM_016333,NM_001244545,NM_016333,NM_001244545,NM_00…	3	ENSRNOG00000004478,ENSRNOG00000004478,ENSRNOG00000004478
chr4	Cufflinks	exon	152143865	152147784	-		NOVEL-U	863	1228	738	1054	1029	1092	858	859	51	NM_177412,NM_001017395,NM_001017395,NM_001017395,NM_001017395,NM_001017395,NM_177412,NM_001017395,NM_001017395,NM_001017395,NM_177412,NM_001017395,NM_177412,NM_001261150,NM_001261150,NM_001261150,NM_001101925,NM_001258443,NM_177412,NM_001101925,NM_001017395,NM_001261150,NM_001258443,NM_001017395,NM_001258443,NM_001101925,NM_001261150,NM_001101925,NM_001258443,NM_001261150,NM_001101925,NM_00101739…	3	ENSRNOG00000011614,ENSRNOG00000011614,ENSRNOG00000011614
chr3	Cufflinks	exon	132427202	132428910	-		NOVEL-U	3301	3701	4588	5054	3475	3428	3726	4472	52	NM_133626,NM_001003179,NM_001042576,NM_024281,NM_001003179,NM_001003179,NM_001003179,NM_001003179,NM_001003179,NM_001003179,NM_001003179,NM_001003179,NM_001003179,NM_001003179,NM_024281,NM_024281,NM_024281,NM_001003179,NM_001003179,NM_001003179,NM_024281,NM_024281,NM_024281,NM_024281,NM_024281,NM_024281,NM_024281,NM_001003179,NM_001003179,NM_001003179,NM_001003179,NM_001003179,NM_001003179,NM_001…	5	ENSRNOG00000005958,ENSRNOG00000005958,ENSRNOG00000005958,ENSRNOG00000005958,ENSRNOG00000005958
chr2	Cufflinks	exon	116665552	116669674	-		NOVEL-U	1129	711	1109	632	922	883	1227	1135	53	NM_001039090,NM_001248008,NM_001039090,NM_001248008,NM_001248008,NM_001248008,NM_001248008,NM_001248008,NM_001248008,NM_001248008,NM_001039090,NM_001039090,NM_001039090,NM_001039090,NM_001248008,NM_001248008,NM_001039090,NM_001248008,NM_001039090,NM_001039090,NM_001039090,NM_001039090,NM_001248008,NM_001248008,NM_001205947,NM_001039090,NM_001248008,NM_001039090,NM_001248008,NM_001205947,NM_001248…	3	ENSRNOG00000009899,ENSRNOG00000009899,ENSRNOG00000009899
chr2	Cufflinks	exon	116665551	116669674	-		NOVEL-U	1129	711	1109	632	922	883	1227	1135	53	NM_001039090,NM_001248008,NM_001039090,NM_001248008,NM_001248008,NM_001248008,NM_001248008,NM_001248008,NM_001248008,NM_001248008,NM_001039090,NM_001039090,NM_001039090,NM_001039090,NM_001248008,NM_001248008,NM_001039090,NM_001248008,NM_001039090,NM_001039090,NM_001039090,NM_001039090,NM_001248008,NM_001248008,NM_001205947,NM_001039090,NM_001248008,NM_001039090,NM_001248008,NM_001205947,NM_001248…	3	ENSRNOG00000009899,ENSRNOG00000009899,ENSRNOG00000009899
chr7	Cufflinks	exon	50312703	50316651	+		NOVEL-U	957	961	899	982	1269	801	1153	1062	54	NM_001260879,NM_175489,NM_001260879,NM_001260879,NM_175489,NM_001003712,NM_001260879,NM_175489,NM_001003712,NM_001260879,NM_175489,NM_001003712,NM_001260879,NM_175489,NM_001260879,NM_001260879,NM_001260879,NM_001260879,NM_175489,NM_001260879,NM_175489,NM_001260879,NM_001003712,NM_001003712,NM_175489,NM_001260879,NM_001260879,NM_001003712,NM_001260879,NM_175489,NM_001003712,NM_001260879,NM_0010037…	3	ENSRNOG00000026962,ENSRNOG00000026962,ENSRNOG00000026962
chr5	Cufflinks	exon	5275765	5279592	+		NOVEL-U	1819	1672	2083	1861	2373	2059	2232	2609	56	NM_008678,NM_001114275,NR_003627,NM_008678,NM_008678,NM_001114275,NR_003627,NM_006540,NR_003627,NM_008678,NM_001114275,NM_001114275,NM_001114275,NM_006540,NM_008678,NR_003627,NM_006540,NM_008678,NR_003627,NM_008678,NR_003627,NM_006540,NM_006540,NM_006540,NM_006540,NR_003627,NM_008678,NM_006540,NM_006540,NM_001114275,NR_003627,NM_001114275,NM_001114275,NM_001114275,NM_001114275,NM_001114275,NM_008…	3	ENSRNOG00000007975,ENSRNOG00000007975,ENSRNOG00000007975
chrX	Cufflinks	exon	91359127	91365454	+		NOVEL-U	867	836	692	983	1297	971	1213	1166	63	NM_001206195,NM_001104477,NM_001031122,NM_001206195,NM_001039840,NM_009767,NM_001206195,NM_001031122,NM_001039840,NM_001206195,NM_001031122,NM_001031122,NM_001039840,NM_001031122,NM_001031122,NM_001039840,NM_009767,NM_001039840,NM_009767,NM_001039840,NM_001039840,NM_001039840,NM_001039840,NM_001039840,NM_001039840,NM_001039840,NM_001039840,NM_001039840,NM_009767,NM_009767,NM_001039840,NM_009767,N…	7	ENSRNOG00000037919,ENSRNOG00000037919,ENSRNOG00000037919,ENSRNOG00000037919,ENSRNOG00000042712,ENSRNOG00000042712,ENSRNOG00000042712
chr8	Cufflinks	exon	113470874	113475641	-		NOVEL-U	2834	3024	3203	3025	3472	3840	3211	3651	65	NM_004393,NM_001261351,NM_001261351,NM_004393,NM_001261351,NM_001261351,NM_001261351,NM_001033992,NM_004393,NM_001261351,NM_004393,NM_001261351,NM_001033992,NM_001261351,NM_001261351,NM_010017,NM_001033992,NM_001101700,NM_001261351,NM_010017,NM_001033992,NM_010017,NM_010017,NM_001101700,NM_001261351,NM_004393,NM_001033992,NM_004393,NM_001089011,NM_001261351,NM_001101700,NM_001033992,NM_001130839,…	3	ENSRNOG00000019400,ENSRNOG00000019400,ENSRNOG00000019400
chr4	Cufflinks	exon	186780138	186784478	+		NOVEL-U	2179	882	2156	835	1359	780	1302	1623	68	NM_026054,NM_001243821,NM_001243821,NM_001243821,NM_026054,NM_001101072,NM_001101072,NM_018169,NM_018169,NM_001101072,NM_001243821,NM_001243821,NM_001101072,NM_018169,NM_026054,NM_018169,NM_001101072,NM_001243821,NM_001243821,NM_018169,NM_001101072,NM_001243821,NM_018169,NM_001101072,NM_001101072,NM_018169,NM_001101072,NM_001243821,NM_018169,NM_001243821,NM_001101072,NM_018169,NM_001243821,NM_001…	2	ENSRNOG00000036913,ENSRNOG00000036913
chr10	Cufflinks	exon	56552872	56554438	-		NOVEL-U	1334	1016	1487	1030	1076	1412	1111	1230	74	NM_000937,NM_001244002,NM_001206313,NM_000937,NM_000937,NM_001244002,NM_000937,NM_001244002,NM_001206313,NM_001244002,NM_000937,NM_001206313,NM_001244002,NM_009089,NM_009089,NM_001061205,NM_001061205,NM_009089,NM_001061205,NM_078569,NM_078569,NM_068122,NM_078569,NM_068122,NM_001180200,NM_001180200,NM_001040904,NM_001040904,NM_001180200,NM_001040904,NM_001061205,NM_078569,NM_001061205,NM_119746,NM…	4	ENSRNOG00000028834,ENSRNOG00000028834,ENSRNOG00000028834,ENSRNOG00000028834
chr19	Cufflinks	exon	39606383	39612903	-		NOVEL-U	1594	1272	1457	1352	2092	1492	2225	1467	77	NM_001080930,NM_001137675,NM_001194100,NM_001194100,NM_001137675,NM_001194100,NM_001080930,NM_001194100,NM_001137675,NM_001194100,NM_001137675,NM_001194100,NM_001194100,NM_001137675,NM_001080930,NM_001194100,NM_001137675,NM_001194100,NM_001137675,NM_001080930,NM_001137675,NM_001194100,NM_001137675,NM_001137675,NM_001137675,NM_001137675,NM_001194100,NM_001080930,NM_001137675,NM_001080930,NM_001080…	4	ENSRNOG00000038766,ENSRNOG00000038766,ENSRNOG00000038766,ENSRNOG00000038766
chr14	Cufflinks	exon	22612885	22613151	.		NOVEL-U	746	2031	1558	2580	591	1615	1300	1513	81	NM_008907,NM_001052252,NM_001146606,NM_001251759,NM_001257377,NM_001257106,NR_036671,NR_036672,NR_036506,NM_001144032,NR_036673,NM_021130,NM_001009370,NM_001257377,NM_115465,NM_001033647,NM_001144032,NM_001251759,NM_001161963,NM_001161963,NM_119653,NM_001257377,NM_001141689,NM_001248294,NM_001248294,NM_201205,NM_201205,NM_001070528,NM_001070528,NM_001248294,NM_001086791,NM_212758,NM_078642,NM_074…	3	ENSRNOG00000007183,ENSRNOG00000007183,ENSRNOG00000007183
chr16	Cufflinks	exon	23661795	23669813	+		NOVEL-U	2090	1587	2059	1644	2385	1915	1671	1972	81	NM_206909,NM_206909,NM_177698,NM_206909,NM_206909,NM_177698,NM_206909,NM_177698,NM_206909,NM_206909,NM_206909,NM_206909,NM_177698,NM_206909,NM_206909,NM_206909,NM_206909,NM_206909,NM_206909,NM_206909,NM_206909,NM_206909,NM_206909,NM_206909,NM_206909,NM_206909,NM_206909,NM_177698,NM_177698,NM_177698,NM_206909,NM_206909,NM_177698,NM_206909,NM_206909,NM_206909,NM_206909,NM_177698,NM_177698,NM_206909…	3	ENSRNOG00000013884,ENSRNOG00000013884,ENSRNOG00000013884
