# Supplementary material for: RNA-Seq Profiling Reveals Novel Hepatic Gene Expression Pattern in Aflatoxin B1 Treated Rats
Source: PLoS One. 2013 Apr 22;8(4):e61768. doi: 10.1371/journal.pone.0061768 (PMC3632591; doi:10.1371/journal.pone.0061768)
Supplement: Table S9 — Cuffdiff connectivity pathway. (XLSX) [file pone.0061768.s019.xlsx]

## Sheet: Table S-9
Symbol	Synonym(s)	Entrez Gene Name	RefSeq	Fold Change	REfSeq Genes with >5 Pathway Connections
CDH13	4932416G01Rik, CADHERIN 13, CDHH, Cdht, H-cadherin, Heart-cadherin, MGC93172, P105, T-CAD, T-CADHERIN, Truncated-cadherin	cadherin 13, H-cadherin (heart)	NM_138889	110.165
GSTP1	DFN7, FAEES3, GLUTATHIONE S TRANSFERASE PHI, Glutathione s-transferase, chain b, Gm3934, GST P1-1, GST PI, Gst pi-class subunit 7, Gst Yf, GST-P, GST3, Gst7-7, Gst7pi, Gstp2, GSTpiA, GstpiB, Lysyl Oxidase 2, MGC72668, MGC72669, PI	glutathione S-transferase pi 1	NM_012577	73.1627
SLC7A11	9930009M05RIK, AI451155, CCBR1, CYSTEINE GLUATAMINE TRANSPORTER, sut, xCT	solute carrier family 7 (anionic amino acid transporter light chain, xc- system), member 11	NM_001107673	59.4151
MYBL2	B-MYB, MGC15600, MYB-Related Protein B, MYBB, RP23-335N12.7	v-myb myeloblastosis viral oncogene homolog (avian)-like 2	NM_001106536	22.9748
VDR	BOS 5154, NR1I1	vitamin D (1,25- dihydroxyvitamin D3) receptor	NM_017058	11.0594
A1BG	A1B, ABG, Alpha 1 b glycoprotein, ALPHA-1-BETA-GLYCOPROTEIN, C44, DKFZp686F0970, GAB, HYST2477	alpha-1-B glycoprotein	NM_022258	10.8551
CA2	AI131712, CA-II, CAR2, Carbonic anhydrase 2, Ltw-5, Lvtw-5	carbonic anhydrase II	NM_019291	9.83965
PHGDH	3-PGDH, 4930479N23, A10, MGC105399, MGC113796, MGC117966, MGC3017, PDG, PGAD, PGD, PGDH, PGDH3, RP4-683H9.1, SERA	phosphoglycerate dehydrogenase	NM_031620	8.94341
CKAP2	AI461656, AW228814, DKFZp686L1238, FLJ10749, LB1, se20-10, TMAP	cytoskeleton associated protein 2	NM_001169139	8.06759
ALDH3A1	Ahd-4, AHDC, Aldehyde Dehydrogenase, ALDEHYDE DEHYDROGENASE 3 FAMILY, MEMBER A1, Aldh, ALDH3, ALDHIII, MGC10406, RP23-55I2.1, T-aldh	aldehyde dehydrogenase 3 family, member A1	NM_031972	7.84264
ELOVL7	9130013K24RIK, AI840082, FLJ23563	ELOVL fatty acid elongase 7	NM_001191844	7.81232
C11orf82	4632434I11Rik, FLJ13936, FLJ25416, FLJ38838, Noxin, RGD1559690	chromosome 11 open reading frame 82	NM_001126294	7.18598
NQO1	AV001255, DHQU, DIA4, DT-diaphorase, DTD, MGC93075, NAD DT-diaphorase, NAD(P)H dehydrogenase, quinone 1, Nadph dehydrogenase, Nadph diaphorase, Nadph Quinone Oxidoreductase-1, NMO1, NMOR, NMOR1, NMORI, Nqo, Ox-1, QR1, Quinone reductase	NAD(P)H dehydrogenase, quinone 1	NM_017000	6.25112
DDR1	6030432F18, AI323681, CAK, CD167, CD167a, CD167a antigen, CR974483.1, DAAP-278B20.1, DDR, Drd1, EDDR1, HGK2, MCK10, NEP, NTRK4, PTK3, PTK3A, PTK3D, RTK6, TRKE, Tyrosine kinase DDR	discoidin domain receptor tyrosine kinase 1	NM_013137	5.84581
NOL3	ARC, B430311C09Rik, FLJ35304, MYC, NOP, NOP30	nucleolar protein 3 (apoptosis repressor with CARD domain)	NM_053516	5.35615
RAD51	AV304093, BRCC5, HRAD51, HsRad51, HsT16930, MRMV2, RAD51A, RECA, RECA-LIKE, RGD1563603, RP23-15I21.4	RAD51 homolog (S. cerevisiae)	NM_001109204	5.04267
MGMT	AGAT, AGT, AI267024, MGC107020, O6-ALKYLGUANINE DNA ALKYLTRANSFERASE, RP11-109A6.1	O-6-methylguanine-DNA methyltransferase	NM_012861	4.41559
ESPL1	AL024103, AU045071, CERP, ESP1, FLJ46492, KIAA0165, PRCE, SEPA, SEPARASE, SSE	extra spindle pole bodies homolog 1 (S. cerevisiae)	NM_001170602	4.30037
Cd24a	CD24, Heat stable antigen, HSA, Ly-52, MGC93641, nectadrin	CD24a antigen	NM_012752	4.24281
CDK1	CDC2, CDC2 kinase, CDC28A, Cdc2a, DKFZp686L20222, GROWTH-ASSOCIATED HISTONE H1 KINASE, MGC111195, p34, P34CDC2	cyclin-dependent kinase 1	NM_019296	3.86593	14
DCDC2	AW492955, DCDC2A, MGC54817, RP11-260H5 B.1, RP23-211M15.1, RU2, RU2S	doublecortin domain containing 2	NM_001106110	3.61929
CDKN1A	CAP20, CDKI, CDKN1, CDKNA1, CIP1, MDA-6, P21, p21CIP1, p21WAF, p21waf1, Pzl Cyclin-Dependent Kinase Inhibitor, SDI1, WAF1	cyclin-dependent kinase inhibitor 1A (p21, Cip1)	NM_080782	3.51792	24
CDKN2C	C77269, CDKN6, INK4C, INK4d, p18, p18-INK4C, p18-INK6, RP11-278J17.2, RP23-320F19.3	cyclin-dependent kinase inhibitor 2C (p18, inhibits CDK4)	NM_131902	3.48088
PTTG1	AW555095, C87862, EAP1, HPTTG, MGC126883, MGC138276, Pituitary tumor transforming 1, PITUITARY TUMOR TRANSFORMING GENE PROTEIN1, PTTG, Pttg3, RP23-26M1.2, Securin, TUTR1	pituitary tumor-transforming 1	NM_022391	3.48014
CRYAB	AACRYA, ABC, ALPHA B CRYSTALLIN, Alpha crystallin b chain, BOS 14343, CRYA2, CRYSTALLIN ALPHA 2, Crystallin alpha b, CTPP2, Heat-shock 20 kDa like, HSPB5	crystallin, alpha B	NM_012935	3.42979
AURKB	AIK2, AIM-1, AIRK2, AL022959, ARK-2, AurB, aurkb-sv1, aurkb-sv2, AURORA B, IPL1, PPP1R48, RP23-19I2.1, Serine/threonine kinase 5, STK-1, STK12, STK5	aurora kinase B	NM_053749	3.38661
DSN1 (includes EG:100002916)	1700022L09Rik, AW552447, C20orf172, dJ469A13.2, FLJ13346, hKNL-3, KNL3, MGC116180, MGC32987, MIS13, Q9H410, RP23-430P1.2, RP3-469A13.1	DSN1, MIND kinetochore complex component, homolog (S. cerevisiae)	NM_001025768	3.34141
KRT19 (includes EG:16669)	AI663979, CK19, EndoC, K19, K1CS, Ka19, Krt-1.19, Krt1-19, MGC124534, MGC15366, MGC156553, MGC25344, RP23-217I3.3	keratin 19	NM_199498	3.30215
TTK	AL022661, CT96, ESK, Esk1, FLJ38280, MPS1, MPS1L1, PYT, RP3-357D13.2	TTK protein kinase	NM_001108172	3.2304
PRNP	+Prnp, AA960666, AI325101, ASCR, BOS 13027, CD230, CJD, GSS, KURU, MGC140197, MGC26679, p27-30, PRION, PRIP, Prn, Prn-i, PrP, PRP-RES, PrP27-30, PrP33-35C, PrPC, PRPTSE, RP23-401J24.1, RP5-1068H6.2, Sinc	prion protein	NM_012631	3.14397
DLGAP5	C77459, C86398, Dap-5, DLG7, HURP, KIAA0008, mKIAA0008	discs, large (Drosophila) homolog-associated protein 5	NM_001135802	3.13234
TUBB6	2310057H16Rik, BB220206, HsT1601, MGC116110, MGC132410, MGC4083, RGD1305887, TUBB-5, Tubulin Beta 5	tubulin, beta 6 class V	NM_001025675	3.12374
SPC25 (includes EG:100144563)	2600017H08RIK, 2610205L13Rik, AD024, hSpc25, MGC108932, MGC22228, RGD1307811, RP23-431D4.3, SPBC25	SPC25, NDC80 kinetochore complex component, homolog (S. cerevisiae)	NM_001009654	3.12138
UBE2S	0910001J09Rik, 6720465F12Rik, AA409170, E2-EPF5, E2-EPF, EPF5, MGC101982, OK/SW-cl.73, RGD1564746	ubiquitin-conjugating enzyme E2S	NM_001106224	3.09172
CDKN3	2410006H10Rik, CDI1, CDK2-associated dual specificity phosphatase, CIP2, Cyclin Dependent Kinase Inhibitor 3, CYCLIN-DEPENDENT KINASE-ASSOCIATED PROTEIN PHOSPHATASE, FLJ25787, KAP, KAP1, MGC70625	cyclin-dependent kinase inhibitor 3	NM_001106028	2.92018
CEP55	1200008O12Rik, 2700032M20Rik, C10orf3, CT111, FLJ10540, MGC116160, RGD1305340, RP11-30E16.2, URCC6	centrosomal protein 55kDa	NM_001025646	2.84385
CENPF	6530404A22Rik, AI325968, CENF, hcp-1, LEK1, MITOSIN, PRO1779, RP11-262H5.1	centromere protein F, 350/400kDa (mitosin)	NM_001100827	2.81302
NUF2	2410003C07Rik, AU044112, C85691, CDCA1, CT106, NUF2R	NUF2, NDC80 kinetochore complex component, homolog (S. cerevisiae)	NM_001012028	2.69836
TNFRSF9	4-1BB, A930040I11RIK, AA408498, AI325004, CD137, CDw137, FLJ43501, ILA, Ly63, MGC114552, MGC2172, RP23-272N19.6	tumor necrosis factor receptor superfamily, member 9	NM_001025773	2.64718
PRC1 (includes EG:233406)	ASE1, D7Ertd348e, MGC1671, MGC3669, MGC6745, PROTEIN REGULATING CYTOKINESIS 1	protein regulator of cytokinesis 1	NM_001107529	2.54426
TYMS	HST422, MGC156654, MGC88736, OK/SW-cl.29, Thymidylate Synthase, TMS, TS	thymidylate synthetase	NM_019179	2.50604
MST1R	CD136, CDw136, Fv-2, MSPR, PTK8, RON, STK	macrophage stimulating 1 receptor (c-met-related tyrosine kinase)	NM_001106855	2.42491
GSTA2	GST YC2, GST2, Gst2-2, Gsta6, Gstc-2, GTA2, GTH2, LOC501110, MGC10525, MGC112704, MGC29061, Yc2	glutathione S-transferase alpha 2	NM_001024361	2.15097
FAS	AI196731, ALPS1A, APO-1, APT1, CD95, CD95 RECEPTOR, CD95L, FAS/APO1, FAS1, FASTM, lpr, Receptors for Fas Ligand, RP11-399O19.7, Tnf receptor member 6, TNFR6, TNFRSF6	Fas (TNF receptor superfamily, member 6)	NM_139194	2.10485	5
CCND1	AI327039, B-CELL CLL/LYMPHOMA 1, BCL1, BOS 25001, cD1, CYCLIN D1, Cyl-1, D11S287E, G1/S-Specific Cyclin D1, MGC137744, PRAD1, U21B31	cyclin D1	NM_171992	2.08485	21
BTG2	AA959598, Agl, An, an-1, APRO1, B-cell translocation gene 2, antiproliferative, MGC126063, MGC126064, PC3, TIS21	BTG family, member 2	NM_017259	2.03978
GJA1	AU042049, AVSD3, AW546267, Cnx43, connexin43, CX43, Cx43alpha1, DFNB38, GJAL, HLHS1, HSS, MGC93610, Npm1, ODDD	gap junction protein, alpha 1, 43kDa	NM_012567	2.03582
