# Supplementary material for: RNA-Seq Profiling Reveals Novel Hepatic Gene Expression Pattern in Aflatoxin B1 Treated Rats
Source: PLoS One. 2013 Apr 22;8(4):e61768. doi: 10.1371/journal.pone.0061768 (PMC3632591; doi:10.1371/journal.pone.0061768)
Supplement: Table S10 — E2f1 connectivity pathway. (XLSX) [file pone.0061768.s020.xlsx]

## Sheet: Table S-10
Symbol	Synonym(s)	Entrez Gene Name	RefSeq	Fold Change	E2F1 Genes with >5 Pathway Connections
WFIKKN2	2610304F08RIK, AY100450, GASP-1, hGASP-1, MGC130508, RGD1305361, RP23-244C22.2, UNQ9235/PRO31996, WFIKKNRP	WAP, follistatin/kazal, immunoglobulin, kunitz and netrin domain containing 2	XM_220855	442.348
ALDH3A1	Ahd-4, AHDC, Aldehyde Dehydrogenase, ALDEHYDE DEHYDROGENASE 3 FAMILY, MEMBER A1, Aldh, ALDH3, ALDHIII, MGC10406, RP23-55I2.1, T-aldh	aldehyde dehydrogenase 3 family, member A1	NM_031972	302.384
GSTP1	DFN7, FAEES3, GLUTATHIONE S TRANSFERASE PHI, Glutathione s-transferase, chain b, Gm3934, GST P1-1, GST PI, Gst pi-class subunit 7, Gst Yf, GST-P, GST3, Gst7-7, Gst7pi, Gstp2, GSTpiA, GstpiB, Lysyl Oxidase 2, MGC72668, MGC72669, PI	glutathione S-transferase pi 1	NM_012577	73.5699	7
PLN	CMD1P, CMH18, PLB, Plm, RP3-509L4.2	phospholamban	NM_022707	65.2785
CLEC4M	Clec4m, Dc-signr, mSIGNR3, RGD1561104, SIGN-R3	CD209d antigen	NM_001108849	38.1575
VDR	BOS 5154, NR1I1	vitamin D (1,25- dihydroxyvitamin D3) receptor	NM_017058	28.0318
GPX2	GI-GPx, GPRP, GPRP-2, GPX-GI, GSHPx-2, GSHPX-GI	glutathione peroxidase 2 (gastrointestinal)	NM_183403	22.7069
MYBL2	B-MYB, MGC15600, MYB-Related Protein B, MYBB, RP23-335N12.7	v-myb myeloblastosis viral oncogene homolog (avian)-like 2	NM_001106536	21.1133
ABCC3	1700019L09Rik, ABC31, ATP-binding cassette C3, cMOAT2, DKFZp686E22157, EST90757, MLP2, MOAT-D, MRP3, Multidrug Resistant Protein 3, RP23-65I14.2	ATP-binding cassette, sub-family C (CFTR/MRP), member 3	NM_080581	12.9296
CNKSR1	BC037758, CNK, CNK1, CONNECTOR ENHANCER OF KSR-LIKE, KSR, MGC124829, RP23-354H24.4	connector enhancer of kinase suppressor of Ras 1	NM_001039011	12.4652
LAMA5	AA408760, AA408762, AI853660, KIAA1907, Laminin alpha 5, laminin-511, mKIAA0533, RP11-157P1.6, RP23-16P3.3, [a]5	laminin, alpha 5	NM_001191609	11.5577
PHGDH	3-PGDH, 4930479N23, A10, MGC105399, MGC113796, MGC117966, MGC3017, PDG, PGAD, PGD, PGDH, PGDH3, RP4-683H9.1, SERA	phosphoglycerate dehydrogenase	NM_031620	9.33601
CA2	AI131712, CA-II, CAR2, Carbonic anhydrase 2, Ltw-5, Lvtw-5	carbonic anhydrase II	NM_019291	9.3
FAM83F	AW544981, MGC27770, RGD1562089, RP3-496C20.4	family with sequence similarity 83, member F	NM_001130502	7.48568
DMBT1	CRP, CRP-[a], CRP-[b], Crpd, DBMT1, FLJ61058, gp300, GP340, hensin, LOC691969, MGC164738, muclin, p80, RP11-481L19.1	deleted in malignant brain tumors 1	NM_022849	7.05607
SOX9	2010306G03Rik, AV220920, CMD1, CMPD1, KIAA4243, mKIAA4243, RP23-36D5.1, SRA1	SRY (sex determining region Y)-box 9	XM_003750950	6.42167
MYBL1	A-MYB, G1-419-6, MGC120059, MGC120061, MGC123416, repro9	v-myb myeloblastosis viral oncogene homolog (avian)-like 1	NM_001106632	6.28883
DDR1	6030432F18, AI323681, CAK, CD167, CD167a, CD167a antigen, CR974483.1, DAAP-278B20.1, DDR, Drd1, EDDR1, HGK2, MCK10, NEP, NTRK4, PTK3, PTK3A, PTK3D, RTK6, TRKE, Tyrosine kinase DDR	discoidin domain receptor tyrosine kinase 1	NM_001166022	6.20017
NQO1	AV001255, DHQU, DIA4, DT-diaphorase, DTD, MGC93075, NAD DT-diaphorase, NAD(P)H dehydrogenase, quinone 1, Nadph dehydrogenase, Nadph diaphorase, Nadph Quinone Oxidoreductase-1, NMO1, NMOR, NMOR1, NMORI, Nqo, Ox-1, QR1, Quinone reductase	NAD(P)H dehydrogenase, quinone 1	NM_017000	6.16892
FABP4	422/aP2, A-fab, A-FABP, Adipocyte fatty acid binding, ALBP, ALBP/Ap2, AP2, Ap2 lipid-binding protein, Lbpl	fatty acid binding protein 4, adipocyte	NM_053365	5.98347
GRIA3	2900064I19RIK, GluA3, GLUR-C, GLUR-K3, GLUR3, Gluralpha3, KIAA4184, mKIAA4184, MRX94, RP11-349N19.3, RP23-471M13.1	glutamate receptor, ionotropic, AMPA 3	NM_001112742	5.96558
CFTR	ABC35, ABCC7, AW495489, CF, CFTR/MRP, dJ760C5.1, MRP7, RGD1561193, tcag7.78, TNR-CFTR	cystic fibrosis transmembrane conductance regulator (ATP-binding cassette sub-family C, member 7)	NM_031506	5.89985	10
CDKN1C	AL024410, BWCR, BWS, CDK INHIBITOR 1C, CDKI, KIP2, MGC112585, p57, p57(kip2), p57KIP2, WBS	cyclin-dependent kinase inhibitor 1C (p57, Kip2)	NM_001033757	5.65302
WISP2	CCN5, CRGR4, CT58, CTGF-L, Rcop1, RP11-445H22.2, RP23-161B3.1	WNT1 inducible signaling pathway protein 2	NM_031590	5.03411
SFRP1	2210415K03RIK, AW011917, AW107218, AW742929, BOS 23882, FRP, FRP-1, FrzA, SARP2, SECRETED FRIZZLE-RELATED SEQUENCE, Secreted frizzled-related 1	secreted frizzled-related protein 1	XM_224987	5.02255
NAP1L2	BPX, MGC26243	nucleosome assembly protein 1-like 2	NM_001024789	4.80385
RAD51	AV304093, BRCC5, HRAD51, HsRad51, HsT16930, MRMV2, RAD51A, RECA, RECA-LIKE, RGD1563603, RP23-15I21.4	RAD51 homolog (S. cerevisiae)	NM_001109204	4.35528
KIAA0101	2810417H13Rik, AA409629, FLJ58702, L5, MGC29306, mKIAA0101, Ns5apt9, NS5ATP9, OEATC, OEATC-1, p15(PAF), p15/PAF, p15PAF, PAF	KIAA0101	NM_201418	4.34345
PBK	2810434B10Rik, AW538537, CT84, D14Ertd732e, FLJ14385, Nori-3, SPERMATOGENESIS RELATED PROTEIN KINASE, SPK, TOPK	PDZ binding kinase	NM_001079937	4.29162
MGMT	AGAT, AGT, AI267024, MGC107020, O6-ALKYLGUANINE DNA ALKYLTRANSFERASE, RP11-109A6.1	O-6-methylguanine-DNA methyltransferase	NM_012861	4.28798
SGCB	A3b, AI747103, AI844814, Beta sacroglycan, BETA SARCOGLYCAN, beta-SG, LGMD2E, LOC687025, SGC	sarcoglycan, beta (43kDa dystrophin-associated glycoprotein)	NM_001191068	4.27496
RRM2	AA407299, LOC100359539, MGC113712, MGC116120, R2, Ribonucleoside-diphosphate reductase M2 subunit, Ribonucleotide reductase non-heme subunit, RIBONUCLEOTIDE REDUCTASE SMALL SUBUNIT, Rnr-r2, RNRII, RR2, RR2M	ribonucleotide reductase M2	NM_001025740	4.26858
SEMA3B	AW208495, FLJ34863, LUCA-1, RP23-456B9.1, SemA, SEMA5, SEMAA, semaV	sema domain, immunoglobulin domain (Ig), short basic domain, secreted, (semaphorin) 3B	NM_001079942	4.2574
PDGFD	1110003I09Rik, IEGF, MGC26867, MSTP036, rSCDGF-B, SCDGF-B	platelet derived growth factor D	NM_023962	4.22729
CHAF1B	2600017H24Rik, C76145, CAF-1, CAF-1 subunit B, CAF-I 60 kDa subunit, CAF-IP60, CAF1A, CAF1P60, MPHOSPH7, MPP7	chromatin assembly factor 1, subunit B (p60)	NM_001024741	4.17457
TSPAN8	C76990, CO-029, CO-29, E330007O21Rik, MGC38363, TM4SF3	tetraspanin 8	NM_133526	4.13117
NCAPH	A730011O11Rik, BRRN1, CAP-H, HCAP-H, LOC680089, LOC688088, MGC38424, mKIAA0074	non-SMC condensin I complex, subunit H	XR_086214	4.12155
CDK1	CDC2, CDC2 kinase, CDC28A, Cdc2a, DKFZp686L20222, GROWTH-ASSOCIATED HISTONE H1 KINASE, MGC111195, p34, P34CDC2	cyclin-dependent kinase 1	NM_019296	3.97288	12
TFF3	ITF, mITF, P1.b, P1B, TFI, TIFF3	trefoil factor 3 (intestinal)	NM_013042	3.97142
EHF	9030625L19Rik, AU019492, ESE3, ESEJ, RP23-266F3.1	ets homologous factor	NM_001106493	3.79063
MELK	AI327312, HPK38, KIAA0175, Maternal embryonic leucine zipper kinase, mKIAA0175, MPK38, Protein kinase PK38, RP11-8N6.1, RP23-382O11.1	maternal embryonic leucine zipper kinase	NM_001108662	3.78634
NOL3	ARC, B430311C09Rik, FLJ35304, MYC, NOP, NOP30	nucleolar protein 3 (apoptosis repressor with CARD domain)	NM_053516	3.77643
SLC5A1	D22S675, MGC93553, NAGT, RP1-127L4.1, SGLT1	solute carrier family 5 (sodium/glucose cotransporter), member 1	NM_013033	3.72262
P2RX1	AI323649, BB122383, P2x, P2X1, P2XMR, PDCD3, RP-2, RP23-263M10.1	purinergic receptor P2X, ligand-gated ion channel, 1	NM_012997	3.65963
NCF2	FLJ93058, NADPH OXIDASE, NOXA2, NSF2, p67, P67-PHOX, RP1-127C7.5	neutrophil cytosolic factor 2	NM_001100984	3.5817
CDKN2C	C77269, CDKN6, INK4C, INK4d, p18, p18-INK4C, p18-INK6, RP11-278J17.2, RP23-320F19.3	cyclin-dependent kinase inhibitor 2C (p18, inhibits CDK4)	NM_131902	3.53235
EGLN3	2610021G09Rik, AI505553, AI648162, FLJ21620, HIFP4H3, HIFPH3, MGC125998, MGC125999, PHD-3, SM-20	egl nine homolog 3 (C. elegans)	NM_019371	3.43937
ESPL1	AL024103, AU045071, CERP, ESP1, FLJ46492, KIAA0165, PRCE, SEPA, SEPARASE, SSE	extra spindle pole bodies homolog 1 (S. cerevisiae)	NM_001170602	3.41427
CLIC5	5730531E12Rik, B330005L24, CLIC5A, FLJ90663, Gm322, jbg, MST130, MSTP130, RP11-546O15.1	chloride intracellular channel 5	NM_053603	3.40051
CCNG1	AI314029, CCNG, CYCG, CYCLIN G1, MGC93642, RP23-382C18.1	cyclin G1	NM_012923	3.29829
DSN1	1700022L09Rik, AW552447, C20orf172, dJ469A13.2, FLJ13346, hKNL-3, KNL3, MGC116180, MGC32987, MIS13, Q9H410, RP23-430P1.2, RP3-469A13.1	DSN1, MIND kinetochore complex component, homolog (S. cerevisiae)	NM_001025768	3.27466
PTTG1	AW555095, C87862, EAP1, HPTTG, MGC126883, MGC138276, Pituitary tumor transforming 1, PITUITARY TUMOR TRANSFORMING GENE PROTEIN1, PTTG, Pttg3, RP23-26M1.2, Securin, TUTR1	pituitary tumor-transforming 1	NM_022391	3.23856
SPP1 (includes EG:20750)	2AR, Apl-1, BNSP, Bone Sialoprotein, Bopn, BOS 6536, Bsp, BSPI, Eta, ETA-1, LOC100359743, LOC100503439, MGC110940, NEPHROPONTIN, OP, OPN, OPNI, Opnl, OSP, Osteopontin, PSEC0156, Ric, Secreted phosphoprotein 1, SPP1 isoform 1, UROPONTIN	secreted phosphoprotein 1	NM_012881	3.21521
MUC1	CA 15-3, CD227, EMA, EMA1, Episialin, H23AG, KL-6, MAM6, MGC188069, MUC-1/SEC, MUC-1/X, MUC1-beta, MUC1-CT, Mucin, Mucin 1 (episialin), Mucin-1 subunit beta, Mucin1, PANCREATIC MUCIN, PEM, PEMT, PUM, RP11-263K19.2	mucin 1, cell surface associated	NM_012602	3.20743
HIST2H2AC	H2A, H2a(A)-613, H2a-613b, H2A-GL101, H2A/q, H2AFQ, MGC74460, RGD1560965	histone cluster 2, H2ac	XM_001061850	3.2058
UBE2T	2700084L22Rik, C80607, HSPC150, PIG50, RGD1310816, UBCH17, UBIQUITIN-CONJUGATING ENZYME E2 HOMOLOG	ubiquitin-conjugating enzyme E2T (putative)	NM_001108344	3.18589
CDKN1A	CAP20, CDKI, CDKN1, CDKNA1, CIP1, MDA-6, P21, p21CIP1, p21WAF, p21waf1, Pzl Cyclin-Dependent Kinase Inhibitor, SDI1, WAF1	cyclin-dependent kinase inhibitor 1A (p21, Cip1)	NM_080782	3.12284
MGAT3	1110038J12Rik, AI848272, CD99L2 isoform 2, FLJ43371, GNT-III, GNT3, LOC100044697, MGC141943, MGC142278, RP5-1104E15.2	mannosyl (beta-1,4-)-glycoprotein beta-1,4-N-acetylglucosaminyltransferase	NM_019239	3.11655
BARD1	BRAD1, ENSMUSG00000060893, ENSMUSG00000073653	BRCA1 associated RING domain 1	NM_022622	3.10675
CDKN3	2410006H10Rik, CDI1, CDK2-associated dual specificity phosphatase, CIP2, Cyclin Dependent Kinase Inhibitor 3, CYCLIN-DEPENDENT KINASE-ASSOCIATED PROTEIN PHOSPHATASE, FLJ25787, KAP, KAP1, MGC70625	cyclin-dependent kinase inhibitor 3	NM_001106028	3.08647
AURKB	AIK2, AIM-1, AIRK2, AL022959, ARK-2, AurB, aurkb-sv1, aurkb-sv2, AURORA B, IPL1, PPP1R48, RP23-19I2.1, Serine/threonine kinase 5, STK-1, STK12, STK5	aurora kinase B	NM_053749	3.07036
IQGAP3	AI593484, D030034H08, MGC10170, MGC10831, MGC1947, MGC32192	IQ motif containing GTPase activating protein 3	NM_001191709	3.04609
SERPINB1	1190005M04Rik, AI325983, EI, EIA, ELANH2, LEI, LEUKOCYTE ELASTASE INHIBITOR, M/NEI, MGC112650, MGC129309, MNE1, MNEI, MONOCYTE/NEUTROPHIL ELASTASE INHIBITOR, PI2, RP23-427P14.4, Serpinb1a	serpin peptidase inhibitor, clade B (ovalbumin), member 1	NM_001031642	3.01245
MMP12	AV378681, HME, macrophage elastase, ME, METALLOELASTASE, MGC138506, MME, Mmel	matrix metallopeptidase 12 (macrophage elastase)	NM_053963	2.97765
LGALS2	2200008F12Rik, AI324147, GAL2, HL14, MGC75071	lectin, galactoside-binding, soluble, 2	NM_133599	2.94326
CRYAB	AACRYA, ABC, ALPHA B CRYSTALLIN, Alpha crystallin b chain, BOS 14343, CRYA2, CRYSTALLIN ALPHA 2, Crystallin alpha b, CTPP2, Heat-shock 20 kDa like, HSPB5	crystallin, alpha B	NM_012935	2.93696
PRNP	+Prnp, AA960666, AI325101, ASCR, BOS 13027, CD230, CJD, GSS, KURU, MGC140197, MGC26679, p27-30, PRION, PRIP, Prn, Prn-i, PrP, PRP-RES, PrP27-30, PrP33-35C, PrPC, PRPTSE, RP23-401J24.1, RP5-1068H6.2, Sinc	prion protein	NM_012631	2.92425
PPIC	Cyclophilin c, CyP-20c, CYPC, MGC3673, MGC93799	peptidylprolyl isomerase C (cyclophilin C)	NM_001004215	2.91738
KIF15	3110023M17Rik, 3930402I10Rik, D330038N01, FLJ25667, HKLP2, KNSL7, NY-BR-62	kinesin family member 15	NM_181635	2.90985
HMMR	AA386826, CD168, IHABP, MGC119494, MGC119495, RHAMM, RP23-382C18.3	hyaluronan-mediated motility receptor (RHAMM)	NM_012964	2.87053
ASF1B	1700003K02Rik, AA409591, CIA-II, FLJ10604	ASF1 anti-silencing function 1 homolog B (S. cerevisiae)	NM_001107160	2.86974
ANXA13	1810034H17Rik, ANX13, AV055219, ISA, MGC150460	annexin A13	NM_001134910	2.86589
SPC25 (includes EG:100144563)	2600017H08RIK, 2610205L13Rik, AD024, hSpc25, MGC108932, MGC22228, RGD1307811, RP23-431D4.3, SPBC25	SPC25, NDC80 kinetochore complex component, homolog (S. cerevisiae)	NM_001009654	2.82831
PRRG4	9930111I18Rik, LOC100506702, MGC117538, PRGP4, RGD1560542, RP24-297H17.10-001, TMG4	proline rich Gla (G-carboxyglutamic acid) 4 (transmembrane)	NM_001109203	2.77942
FANCD2	2410150O07RIK, AU015151, BB137857, DKFZp762A223, FA-D2, FA4, FACD, FAD, FANCD, FLJ23826	Fanconi anemia, complementation group D2	NM_001001719	2.76608
H19	AI747191, ASM, ASM1, BWS, D11S813E, H19 fetal liver mRNA, LINC00008, MGC4485, NCRNA00008, PRO2605, WT2	H19, imprinted maternally expressed transcript (non-protein coding)	NR_027324	2.73659
VLDLR	AA408956, AI451093, AW047288, BOS 8811, CARMQ1, CHRMQ1, FLJ35024, RP11-320E16.1, VLDL RECEPTOR TYPE I, VLDLRCH	very low density lipoprotein receptor	NM_013155	2.73011
NSL1 (includes EG:25936)	4833432M17Rik, AI451597, C1orf48, DC13, DC31, DC8, DKFZp566O1646, Gm105, Gm984, LOC680574, MIS14, RGD1562052	NSL1, MIND kinetochore complex component, homolog (S. cerevisiae)	NM_001109083	2.72957
PMCH	A230109K23RIK, MCH, Melanin Concentrating Hormone	pro-melanin-concentrating hormone	NM_012625	2.71536
CEP55	1200008O12Rik, 2700032M20Rik, C10orf3, CT111, FLJ10540, MGC116160, RGD1305340, RP11-30E16.2, URCC6	centrosomal protein 55kDa	NM_001025646	2.69232
PSAT1	D8Ertd814e, EPIP, MGC1460, Phosphoserine Aminotransferase, PSA, PSA1, PSAT, Similar to phosphoserine aminotransferase	phosphoserine aminotransferase 1	NM_198738	2.67641
PHLDA3	TIH1	pleckstrin homology-like domain, family A, member 3	NM_001012206	2.67586
CASC5	2310043D08RIK, 5730505K17Rik, AF15Q14, CT29, D40, hKNL-1, hSpc105, KIAA1570, KNL1, LOC100502596, MGC91208, PPP1R55, Rad51, RP23-15I21.2	cancer susceptibility candidate 5	NM_001170594	2.67408
TYMS	HST422, MGC88736, MGC156654, OK/SW-cl.29, Thymidylate Synthase, TMS, TS	thymidylate synthetase	NM_019179	2.66722
GSTA5	ENSMUSG00000074179, Gm10639, Gm3776, Gst Yc, Gst yc2, Gst-ya2, Gst1-1, Gst2-1, Gst2-2, Gsta1, Gsta1-1, Gsta2, Gstc-2, Gstya, LOC100048652, LOC494499, MGC114217, MGC29061, MGC74264, OTTMUSG00000031890	glutathione S-transferase alpha 5	NM_001010921	2.66088
LGALS3BP	90K, BTBD17B, CyCAP, MAC-2-BP, MGC93166, PPICAP, RP23-394O9.4	lectin, galactoside-binding, soluble, 3 binding protein	NM_139096	2.65567
GCLC	D9Wsu168e, GAMMA GCS HEAVY CHAIN, Gamma Glutamyl Cysteine Synthetase Light Subunit, Gamma Glutamylcysteine Synthetase, Gamma glutamylcysteine synthetase heavy subunit, GCL, GCS, GCS, Catalytic, GCS-HS, Ggcs-hs, GLCL, GLCL-H, GLCLC, Glutamate-Cysteine Ligase, Catalytic Subunit, MGC93096	glutamate-cysteine ligase, catalytic subunit	NM_012815	2.637
MCM5	AA617332, AI324988, AL033333, CDC46, mCD46, mCDC46, Mcmd5, MGC5315, P1-CDC46, RP5-824I19 A.1	minichromosome maintenance complex component 5	NM_001106170	2.61784
STAR	AV363654, BOS 23877, D8Ertd419e, MGC134013, STARD1	steroidogenic acute regulatory protein	NM_031558	2.59522
GSTM5	Gst Gt8.7, GSTA3, Gstb-1, Gstm1, Gstm1-1, GSTM5-5, Gstyb1, GTM5, RP23-214E3.6, RP4-735C1.1	glutathione S-transferase mu 5	NM_017014	2.59196
STMN1	19k, C1orf215, FLJ32206, Lag, LAP18, Metablastin, MGC138869, MGC138870, MGC72884, OP18, P18, P19, Phosphoprotein p19, Pig, PP17, Pp18, PP19, PR22, Prosolin, RP1-125I3.5, SMN, stathmin, Stathmin1	stathmin 1	NM_017166	2.58901
CENPF	6530404A22Rik, AI325968, CENF, hcp-1, LEK1, MITOSIN, PRO1779, RP11-262H5.1	centromere protein F, 350/400kDa (mitosin)	NM_001100827	2.58127
CCNA2	AA408589, CCN1, CCNA, Cyca, CycA2, Cyclin a2, MGC156527, p60	cyclin A2	NM_053702	2.56333
RACGAP1	AI227039, AI327394, Band25, CYK4, gtl11, GTPase, HsCYK-4, ID-GAP, MgcRacGAP, mKIAA1478	Rac GTPase activating protein 1	NM_001108112	2.56096
PRC1 (includes EG:233406)	ASE1, D7Ertd348e, MGC1671, MGC3669, MGC6745, PROTEIN REGULATING CYTOKINESIS 1	protein regulator of cytokinesis 1	NM_001107529	2.5186
NRG1 (includes EG:112400)	6030402G23Rik, ARIA, D230005F13Rik, GGF, GGFII, Hgl, HRG, NDF, SMDF, Type I Nrg1	neuregulin 1	NM_031588	2.50563
NDC80	2610020P18Rik, AV139730, HEC, HEC1, HsHec1, hsNDC80, Kinetochore associated 2, KNTC2, TID3	NDC80 kinetochore complex component homolog (S. cerevisiae)	NM_001126270	2.49804
NUSAP1	2610201A12Rik, AI481307, ANKT, AW547774, BB165529, BM-037, FLJ13421, HQ0310 PRO0310P1, LNP, NUSAP, PRO0310p1, Q0310, RP23-22A15.4, SAPL	nucleolar and spindle associated protein 1	NM_001107762	2.47676
DCTD	6030466N05Rik, MGC111062	dCMP deaminase	NM_001013882	2.44334
CENPE	AU019344, BC049989, C530022J18, KIF10, PPP1R61	centromere protein E, 312kDa	XM_003749399	2.44167
BOK	AI847676, AU021146, BCL2L9, Bok1, Bokl, matador, MGC4631, mtd	BCL2-related ovarian killer	NM_017312	2.42208
TOP2A	DNA TOPOISOMERASE II ALPHA, RP23-333D2.5, TOP2, TOPO2 ALPHA, Topoisomerase II alpha, TP2A	topoisomerase (DNA) II alpha 170kDa	NM_022183	2.41463
NUF2	2410003C07Rik, AU044112, C85691, CDCA1, CT106, NUF2R	NUF2, NDC80 kinetochore complex component, homolog (S. cerevisiae)	NM_001012028	2.38199	5
MTHFD1L	2410004L15RIK, AI647056, dJ292B18.2, DKFZp586G1517, FLJ21145, FTHFSDC1, MITOCHONDRIAL C1-THF SYNTHASE, MTC1THFS, RP1-292B18.2	methylenetetrahydrofolate dehydrogenase (NADP+ dependent) 1-like	NM_001108462	2.376
UBE2C	1110015A16Rik, CYCLIN-SELECTIVE UBIQUITIN CARRIER, D2Ertd695e, dJ447F3.2, E2c, RP23-370H21.6, RP3-447F3.1, UBCH10, UBIQUITIN CARRIER PROTEIN E2C	ubiquitin-conjugating enzyme E2C	NM_001106542	2.3751
MDM2	1700007J15Rik, AA415488, ACTFS, hdm2, HDMX, MDM2-A1, MGC5370, MGC71221, Transformed mouse 3t3 cell double minute 2	Mdm2, p53 E3 ubiquitin protein ligase homolog (mouse)	NM_001108099	2.37119	14
TNFRSF9	4-1BB, A930040I11RIK, AA408498, AI325004, CD137, CDw137, FLJ43501, ILA, Ly63, MGC114552, MGC2172, RP23-272N19.6	tumor necrosis factor receptor superfamily, member 9	NM_001025773	2.35129
FAM83D	2310007D09Rik, BB104611, C20orf129, CHICA, dJ616B8.3, FLJ38341, MGC92947, RGD1565583, RP23-119H5.1	family with sequence similarity 83, member D	NM_001107796	2.34098
MAD2L1	AA673185, CMT2, HSMAD2, MAD2, MADP2, MGC113763	MAD2 mitotic arrest deficient-like 1 (yeast)	NM_001106594	2.29497	6
KIF11	EG5, HKSP, Kif8, Kifl1, KNSL1, MCLMR, TRIP5	kinesin family member 11	NM_001169112	2.28683
SPAG5	AI874642, D11Bhm180e, DEEPEST, hMAP126, MAP126, Mastrin, RP23-185A18.13-001, S17	sperm associated antigen 5	NM_001044224	2.28556
ECT2	AI528536, ARHGEF31, FLJ10461, KIAA4037, MGC138291, mKIAA4037	epithelial cell transforming sequence 2 oncogene	NM_001108547	2.27148	5
TTK	AL022661, CT96, ESK, Esk1, FLJ38280, MPS1, MPS1L1, PYT, RP3-357D13.2	TTK protein kinase	NM_001108172	2.25041
DLGAP5	C77459, C86398, Dap-5, DLG7, HURP, KIAA0008, mKIAA0008	discs, large (Drosophila) homolog-associated protein 5	NM_001135802	2.22856
CYP2B6	CPB6, CYP2B, Cyp2b1, Cyp2b10, Cyp2b2, Cyp2b20, Cyp2b20/10, CYP2B3, Cyp2b6/7, CYP2B7, CYP2B7P, Cyp450e, Cypbe, Cype, CYPIIB2, CYPIIB6, Cytochrome P450, 2b19, EFVM, IIB1, LOC361523, MGC188065, p16, P450, P450iib1	cytochrome P450, family 2, subfamily B, polypeptide 6	NM_173294	2.19854
HTATIP2	AW111545, CC3, FLJ26963, HYALURONECTIN, SDR44U1, TAT-INTERACTING PROTEIN 30KD, TIP30	HIV-1 Tat interactive protein 2, 30kDa	NM_001106263	2.15368
KIF23	3110001D19Rik, C87313, CHO1, Kinesin-like 5, KNSL5, MKLP-1	kinesin family member 23	NM_001108155	2.14873
MCM6	ASP-l1, D1Wsu22e, KI-MCM6, MCG40308, Mcmd6, Mis5, MM6, P105MCM	minichromosome maintenance complex component 6	NM_017287	2.14873
MCM3	AL033361, C80350, HCC5, HRLF BETA SUBUNIT (P102 PROTEIN), Mcmd, MGC1157, Mini chromosome maintenance deficient 3, P1, P1-MCM3, P1.h, p1.m, RLFB, RP1-108C2.3	minichromosome maintenance complex component 3	NM_001191805	2.13576
RHOC	AI324259, ARH9, ARHC, H9, MGC1448, MGC61427, RAS HOMOLOG GENE FAMILY, MEMBER C, Rhoc predicted, RHOH9, RP11-426L16.4	ras homolog family member C	NM_001106461	2.10901
WNT4	MGC112773, MGC123964, RP1-224A6.7, RP23-246F18.1, SERKAL	wingless-type MMTV integration site family, member 4	NM_053402	2.10367
FGF1	ACIDIC FGF, AFGF, BOS 8269, Dffrx, ECGF, ECGF-beta, ECGFA, ECGFB, Fam, FGF, FGF-alpha, FGFA, Fibroblast growth factor alpha, GLIO703, HBGF-1, HEPARIN BINDING ECGF	fibroblast growth factor 1 (acidic)	NM_012846	2.10189	9
LPL	HDLCQ11, Lipase, LIPD, Lipoprotein Lipase, Lipoprotein lipase 1, MGC137861, MGC93586	lipoprotein lipase	NM_012598	2.07604
RAD18	2810024C04Rik, hHR18, hRAD18, MGC156682, Rad18sc, RNF73	RAD18 homolog (S. cerevisiae)	NM_001077673	2.04901
BUB1	AL022991, BUB1A, BUB1L, C80208, D2Xrf87, hBUB1, RP23-189N15.7	budding uninhibited by benzimidazoles 1 homolog (yeast)	NM_001106507	2.0485
PLK1	PLK, STPK13	polo-like kinase 1	NM_017100	2.04304
KIFC1	DAQB-126H3.5, Gm4137, HSET, KIFC5A, Kifc5b, KINESIN-RELATED, KNSL2, Knsl2a, LOC100044006, LOC100044746, MGC1202, MGC5880, MGC67832, MGC76666, MGC94918, MGC117605, MGC149736, MGC149737, MHCB, MKLP2, Tctex-7, Tctex-7A	kinesin family member C1	NM_001005878	2.03871
E2F1	E2f, KIAA4009, mKIAA4009, RBAP1, RBBP3, RBP3, RP23-109C16.5	E2F transcription factor 1	NM_001100778	2.03084	45
RAP1GAP	1300019I11Rik, 2310004O14Rik, AI427470, KIAA0474, RAP1B.GAP, RAP1GA1, RAP1GAP1, RAP1GAPII, RAPGAP, RAPGAPII, RP11-63N8.1, RP23-277N22.1	RAP1 GTPase activating protein	NM_001100713	2.01678
GSTA2	GST YC2, GST2, Gst2-2, Gsta6, Gstc-2, GTA2, GTH2, LOC501110, MGC10525, MGC112704, MGC29061, Yc2	glutathione S-transferase alpha 2	NM_017013	2.00766
GNAI1	AU046200, BOS 4157, BPGTPB, G ALPHA I1, Gi, Gi1 alpha-subunit, Gialpha1, MGC128528	guanine nucleotide binding protein (G protein), alpha inhibiting activity polypeptide 1	NM_013145	2.00295	5
EPCAM	CD326, DIAR5, EGP, EGP-2, EGP314, EGP40, ESA, GA733-2, gp40, HNPCC8, KS1/4, KSA, Ly74, M4S1, MIC18, MK-1, Tacsd1, TACSTD1, TROP1	epithelial cell adhesion molecule	NM_138541	1.9915
MND1 (includes EG:295160)	2610034E18Rik, AI591601, GAJ, RGD1309007, TAC3 variant 2	meiotic nuclear divisions 1 homolog (S. cerevisiae)	NC_005101	1.98529
GCLM	AI649393, Gamma gclm, GAMMA GCS LIGHT CHAIN, Gamma glutamylcysteine synthase (regulatory), GAMMA GLUTAMYLCYSTEINE SYNTHETASE, Gcmc, Gcs, Regulatory, GLCLR, glutamat-cystein ligase, regulatory subunit, Glutamate-Cysteine Ligase, Modifier Subunit, RP4-561L24.2	glutamate-cysteine ligase, modifier subunit	NM_017305	1.97698
NCK2	4833426I10RIK, GRB4, LOC100503894, NCKbeta	NCK adaptor protein 2	NM_001108216	1.96795
FAS	AI196731, ALPS1A, APO-1, APT1, CD95, CD95 RECEPTOR, CD95L, FAS/APO1, FAS1, FASTM, lpr, Receptors for Fas Ligand, RP11-399O19.7, Tnf receptor member 6, TNFR6, TNFRSF6	Fas (TNF receptor superfamily, member 6)	NM_139194	1.96383	11
CEP76	6230425F05Rik, 9630013E05, C18orf9, CSG11, FLJ12542, HsT1705, RGD1305183	centrosomal protein 76kDa	NM_001100514	1.95939
DCN	Bone proteoglycan II, BOS 4881, CSCD, DC, DSPG2, mDcn, MGC127810, MGC94682, PG40, PGII, PGS2, SLRR1B	decorin	NM_024129	1.93887
TACC3	Aint, C86661, ERIC-1, Maskin, MGC117382, MGC133242	transforming, acidic coiled-coil containing protein 3	NM_001004424	1.91686
MMP2	BOS 17032, CLG4, CLG4A, GelA, GELATINASE, Gelatinase A, METALLOPROTEINASE 2, MMP-II, MONA, TBE-1	matrix metallopeptidase 2 (gelatinase A, 72kDa gelatinase, 72kDa type IV collagenase)	NM_031054.2	1.91659	11
ABCC1	ABC29, ABCC, Abcc1a, Abcc1b, Avcc1a, DKFZp686N04233, DKFZp781G125, GS-X, Mdrap, MRP, MRP1	ATP-binding cassette, sub-family C (CFTR/MRP), member 1	NM_022281	1.91503
MME	6030454K05Rik, C85356, CALLA, CD10, DKFZp686O16152, ENDOPEPTIDASE 24.11, MGC93576, MGC126681, MGC126707, NEP, Neprilysin, Neutral Brush-Border Endopeptidase, SFE	membrane metallo-endopeptidase	NM_012608	1.90575	5
EZR	AW146364, BOS 138, CVIL, CVL, Cytovillin2, DKFZp762H157, EZRIN, FLJ26216, MGC107499, MGC1584, MGC94076, p81, R75297, VIL2	ezrin	NM_019357	1.90519	7
FBXO5	2510044I10Rik, C85305, EMI1, FBX5, Fbxo31, RP1-101K10.5	F-box protein 5	NM_001106206	1.90385
GSTA1	Glutathione S-transferase Ya-1, Gst1a2, GST2, Gst2-1, GSTA1-1, Gsta2, Gsta2-2, Gst-alpha Yc, GSTYa2, GTH1, MGC112704, MGC131939, OTTMUSG00000031890, RP11-392A23.1, Yc1	glutathione S-transferase alpha 1	NM_001024361	1.89
GJA1	AU042049, AVSD3, AW546267, Cnx43, connexin43, CX43, Cx43alpha1, DFNB38, GJAL, HLHS1, HSS, MGC93610, Npm1, ODDD	gap junction protein, alpha 1, 43kDa	NM_012567	1.88584
CCL21	6CKBAC1, 6CKBAC2, 6CKINE, AI159701, ALP, AW987545, Beta chemokine tca4, Ccl21-Ser, Ccl21a, Ccl21b, Ccl21c, CKb9, ECL, ENSMUSG00000073869, ENSMUSG00000073878, exodus-2, Gm10591, Gm13304, Gm1987, LOC100041504, LOC100041593, MGC105669, MGC107632, MGC34555, OTTMUSG00000011350, plt, RP11-195F19.22-001, RP23-304I1.5, RP23-411B7.4, SCYA21, SCYA21A, Scya21b, Scya21c, SLC, TCA4	chemokine (C-C motif) ligand 21	NM_001008513	1.87002
KIF20A	AA415432, FLJ21151, MKLP2, RAB6KIFL, RABKINESIN 6	kinesin family member 20A	NM_001108426	1.8661
ANXA5	ANAV, Annexin A5, Annexin V, ANX5, BOS 6307, ENX2, LC5, MGC126971, MGC93655, PP4, R74653, RPRGL3	annexin A5	NM_013132	1.84872
UGDH	GDH, UDGH, Udp glucose dehydrogenase, UDP-GlcDH, UDPGDH, UGD	UDP-glucose 6-dehydrogenase	NM_031325	1.83556
ACSL3	2610510B12Rik, ACS3, ACYL-COA SYNTHETASE 3, C85929, FACL3, LACS3, PRO2194	acyl-CoA synthetase long-chain family member 3	NM_057107	1.83445
HLTF	AF010600, BC057116, HIP116, HIP116A, HLTF1, P113, RNF80, RUSH, SMARCA3, SNF2L3, ZBU1	helicase-like transcription factor	NM_001106478	1.83042
Gstm3	Fsc2, Glutathione S-Transferase5, Gst Gt9.3, Gstm4, GstYb4, Gt9.3, mGSTM5	glutathione S-transferase, mu 3	NM_020540	1.82711
SLC25A4	AAC1, Adc, ANC1, ANT, ANT1, AU019225, Mitochondrial adenine nucleotide translocator, PEO2, PEO3, T1	solute carrier family 25 (mitochondrial carrier; adenine nucleotide translocator), member 4	NM_053515	1.82119
HLA-DQA1	Aalpha, ALPHA SUBUNIT OF DS GLYCOPROTEIN, CD, CELIAC1, DAQB-109B10.1, DQ-A1, FLJ27088, FLJ27328, GSE, H2-Aa, HLA-DQA, I-A MHC II Alpha 1, I-Aalpha, Ia-1, LOC731682, LOC100294114, LOC100294162, LOC100294190, LOC100294224, LOC100294277, LOC100294317, MGC105667, MGC149527, MHC class II alpha chain RT1.D alpha, RT1-Ba	major histocompatibility complex, class II, DQ alpha 1	NM_001008831	1.82011
ID1	AI323524, bHLHb24, D2Wsu140e, ID, ID125A, Id1b, Idb1, MGC156482, RP23-106A3.1	inhibitor of DNA binding 1, dominant negative helix-loop-helix protein	NM_012797	1.81999
RGS5	1110070A02Rik, LOC100505773, MST092, MST106, MST129, MSTP032, MSTP092, MSTP106, MSTP129, RP11-430G6.2	regulator of G-protein signaling 5	NM_019341	1.81863
TXNRD1	GRIM-12, KM 102 DERIVED REDUCTASE LIKE FACTOR, MGC9145, MGC93353, Tgr, Thioredoxin reductase, TR, TR1, TRXR1, TXNR	thioredoxin reductase 1	NM_031614	1.81506
RGS2 (includes EG:19735)	AL592303.1, G0/G1 switch regulatory protein 8, G0S8, GIG31, GOS8, Regulator of g protein signaling, Regulator of G protein signaling 2	regulator of G-protein signaling 2, 24kDa	NM_053453	1.80096
IDI1	4832416K17Rik, IDP ISOMERASE, Ipp delta isomerase, IPP isomerase 1, IPP1, IPPI1, Isopentenyl diphosphate isomerase, Isopentenyl diphosphate:dimethylallyl diphosphate isomerase, ISOPENTENYL PYROPHOSPHATE ISOMERASE, MGC108635, MGC118013, MGC8139, Similar to isopentenyl-diphosphate delta isomerase	isopentenyl-diphosphate delta isomerase 1	NM_053539	1.79459
ITGB4	AA407042, C230078O20, CD104, RP23-42F6.1	integrin, beta 4	NM_013180	1.79439
HMGB2	C80539, High mobility group 2, HMG-2, MGC103184, MGC108899, MGC125103, RGD1564519	high mobility group box 2	NM_017187	1.79044
NPDC1	AI314472, CAB-, CAB-1, DKFZp586J0523, MGC94179, RP11-229P13.1, RP23-47P18.6	neural proliferation, differentiation and control, 1	NM_001004231	1.78157
SMC2	5730502P04Rik, AI255214, AW545314, CAP-E, Fin16, FLJ10093, PRO0324, RP23-122I3.3, SMC2L1	structural maintenance of chromosomes 2	NM_001108666	1.77798
TLR1	CD281, DKFZp547I0610, DKFZp564I0682, KIAA0012, LOC100363038, MGC104956, MGC126311, MGC126312, rsc786, TIL, TIL. LPRS5	toll-like receptor 1	NM_001172120	1.75503
HLA-DQB1	Ab, Abeta, AI845868, CELIAC1, DADB-249P12.2, H-2Ab, H2-Ab1, HLA-DQB, I-A, I-Abeta, Ia-2, IAb, IDDM1, LOC100294115, LOC100294191, LOC100294278, LOC100294318, LOC100510689, MGC94124, Mhc class ii beta, Mhc ii i-ad, Mhc2 beta, Rmcs1, RT1-Bb, RT1.B	major histocompatibility complex, class II, DQ beta 1	NM_001243961	1.75439
AOX1	AI196512, AI255253, ALDEHYDE OXIDASE, AO, AOH1, Aox-2, MGC13774, Moro, Ro, XD	aldehyde oxidase 1	NM_019363	1.74627
RBL1	AW547426, CP107, LOC683869, MGC40006, p107, PRB1, RP11-382A12.1	retinoblastoma-like 1 (p107)	NM_001191066	1.74131
PRMT2	AI504737, HRMT1L1, MGC111373, MGC148245, MGC148246	protein arginine methyltransferase 2	NM_001025144	1.73887
TPX2	2610005B21Rik, C20orf1, C20orf2, DIL-2, FLS353, GD:C20orf1, HCA519, HCTP4, p100, REPP86, RESTRICTED EXPRESSED PROLIFERATION ASSOCIATED PROTEIN 100, RP11-243J16.10-002, RP23-414F8.1	TPX2, microtubule-associated, homolog (Xenopus laevis)	NM_001107790	1.73493
INCENP	2700067E22Rik, AU019509, C130081E20, C77457, FLJ31633, MGC111393	inner centromere protein antigens 135/155kDa	NM_001106335	1.72741
KIFC3	AI325457, BB123200, DKFZp686D23201, FLJ34694, KRP4, MGC156699	kinesin family member C3	NM_001103352	1.72324
BAX	Bcl2-associated X, BCL2L4, BOS 17596	BCL2-associated X protein	NM_017059	1.72162
CELA1	1810009A17Rik, 1810062B19Rik, ELA1, ELAI1, PC-TsF, RATELAI1	chymotrypsin-like elastase family, member 1	NM_012552	1.70405
CYP2E1	CPE1, CYP2E, CYPIIE1, P450 2e1, P450-J, P450C2E	cytochrome P450, family 2, subfamily E, polypeptide 1	NM_031543	1.69671
THRA (includes EG:21833)	6430529J03Rik, AR7, AW259572, C-erbA alpha, c-ERBA-1, CHNG6, EAR7, ERB-T-1, ERBA, ERBA1, MGC000261, MGC43240, NR1A1, RP23-395E10.6, Rvr, T3Ralpha, T3R[a], Thr alpha, THRA1, THRA2, TR ALPHA, Tra1	thyroid hormone receptor, alpha	NM_001017960	1.69663
DBP	Albumin d-box binding, Albumin gene d-box binding, D site albumin promoter binding protein, DABP, MGC105474	D site of albumin promoter (albumin D-box) binding protein	NM_012543	1.68411
PRKCZ	14-3-3-zetaisoform, AI098070, aPKCzeta, BOS 15865, C80388, NPKC-ZETA, PKC ζ, PKC-ZETA, PKC2, Pkcz, r14-3-3, R74924, RP23-298E4.6, zetaPKC	protein kinase C, zeta	NM_022507	1.66104
ASPM	AC158946.1, ASP, CALMBP1, D330028K02Rik, DKFZp686N06184, FLJ10517, FLJ10517 FIS, FLJ10518, FLJ10549, FLJ12505 FIS, FLJ43117, MCPH5, RP11-32D17.1, Sha1	asp (abnormal spindle) homolog, microcephaly associated (Drosophila)	NM_001105955	1.63745
COL14A1	5730412L22Rik, AW108078, COLLAGEN TYPE XIV, UND	collagen, type XIV, alpha 1	NM_001130548	1.63727
EDNRB	ABCDS, AU022549, Ednra, ENDOTHELIN B, ET-B, ET-BR, ETR-b, GUSB, HSCR, HSCR2, RP11-318G21.1, Sox10m1, WS4A	endothelin receptor type B	NM_017333	1.63637
HSP90AA1	AL024080, AL024147, BOS 20461, FLJ31884, Heat shock protein 1, alpha, hsp4, HSP86, Hsp86-1, Hsp89, Hsp89-alpha-delta-N, HSP89A, Hsp90, HSP90 ALPHA, HSP90A, HSP90N, HSPC1, HSPCA, HSPCAL1, HSPCAL4, HSPN, LAP2, MGC105293, RP23-60K23.1	heat shock protein 90kDa alpha (cytosolic), class A member 1	NM_175761	1.6316
GSR	AI325518, D8Ertd238e, Glutathione Reductase, Gr-1, Gred, GRX, MGC78522	glutathione reductase	NM_053906	1.62214
SQLE	AI323792, FLJ30795	squalene epoxidase	NM_017136	1.61974
NDRG1	CAP43, CMT4D, DRG-1, GC4, HMSNL, N-myc Downstream Regulated 1, N-myc downstream regulatory protein 1, NDR1, NDRL, NMSL, PROXY1, RIT42, RTP, TARG1, TDD5	N-myc downstream regulated 1	NM_001011991	1.61861
ACOT9	0610041P13Rik, ACATE2, Acate3, Acot10, C76421, CGI-16, MGC124133, MGC124134, MT-ACT48, p48, RP23-395K13.1, U8	acyl-CoA thioesterase 9	NM_001013960	1.59855
APP	Abetapp, Abpp, Adap, Ag, Amyloidogenic glycoprotein, appican, betaApp, Cvap, E030013M08Rik	amyloid beta (A4) precursor protein	NM_019288	1.55408	11
NME1 (includes EG:18102)	AL024257, AWD, GAAD, NB, NBS, NDKA, NDPK-A, NM23, Nm23-h1, NM23-M1, NM23A, Nucleotide diphosphate kinase beta, RP23-378I13.1	NME/NM23 nucleoside diphosphate kinase 1	NM_138548	1.53895
L3MBTL2	4732493N06Rik, dJ756G23.3, H-l(3)mbt-l, L3MBT, M4mbt, MGC124862, MGC31247, RP4-756G23.4	l(3)mbt-like 2 (Drosophila)	NM_001033695	1.53258
RCN1 (includes EG:19672)	FLJ37041, FLJ55835, PIG20, RCAL, RCN, Reticulocalbin 1, RP23-232D1.3	reticulocalbin 1, EF-hand calcium binding domain	NM_001108586	1.53227
XRCC6	CTA-216E10.7, CTC75, CTCBF, G22P1, KU70, Kup70, ML8, Thyroid autoantigen 70 kda, TLAA	X-ray repair complementing defective repair in Chinese hamster cells 6	NM_139080	1.51751
SERPINB9	BB283241, CAP-3, MGC94010, ovalbumin, p19, PI-9, RP23-391I11.1, Serine proteinase inhibitor mBM2A, Spi6	serpin peptidase inhibitor, clade B (ovalbumin), member 9	NM_001007732	1.50638
SMC4	2500002A22Rik, C79747, CAP-C, DKFZP434F205, hCAP-C, MGC125078, SMC4L1	structural maintenance of chromosomes 4	NM_001037185	1.49986
PAK1	Alpha Pak, AW045634, MGC130000, MGC130001, Muk2, Pak, PAK1B, PAK20, PAKA, PAKalpha	p21 protein (Cdc42/Rac)-activated kinase 1	NM_017198	1.4926
IGFBP7	AGM, FSTL2, IBP-7, IGFBP-7v, IGFBPRP1, MAC25, PROSTACYCLIN STIMULATING FACTOR, PSF, RAMSVPS, TAF	insulin-like growth factor binding protein 7	NM_001013048	1.49183
MAP4K4	9430080K19RIK, AU043147, AU045934, AW046177, FLH21957, FLJ10410, FLJ20373, FLJ90111, HEMOPOIETIC PROGENITOR KINASE, HGK, KIAA0687, MEKKK4, NIK	mitogen-activated protein kinase kinase kinase kinase 4	NM_001106904	1.46451
SULF2	2010004N24Rik, AU020235, DKFZp313E091, FLJ44488, FLJ90554, HSULF-2, KIAA1247, MGC126411, mKIAA1247, MSulf-2, RP23-120P1.2, RP5-1049G16.1	sulfatase 2	NM_001034927	1.44936
MFGE8	AA408458, AGS, AI325141, BA46, BOS 20119, EDIL1, HMFG, hP47, HsT19888, lactadherin, MFG, MFGM, MFGME8, MFGMP-E8, MGC127309, Milk fat globule-EGF factor 8, OAcGD3S, P47, SED1, SPAG10	milk fat globule-EGF factor 8 protein	NM_001040186	1.42906
FADS1	0710001O03RIK, A930006B21Rik, AI317215, BC269730-2, D5D, DSD, FADS6, FADSD5, Fatty acid desaturase, Fatty acid desaturase 1, FLJ38956, FLJ90273, LLCDL1, MGC37858, TU12	fatty acid desaturase 1	NM_053445	-1.43566
XPC	RAD4, XP3, XPCC	xeroderma pigmentosum, complementation group C	NM_001107874	-1.43579
ATF5	AFTA, Atf7, ATFX, FLJ34666, HMFN0395, MGC102397, ODA-10	activating transcription factor 5	NM_172336	-1.4374
A2M	A2m1, A2maa, A2MAC1, A2MD, A2mp, Alpha 2 Macroglobulin, Alpha-2-microglobulin, ALPHA2 M, Alpha2 macrofetoprotein, ALPHA2 MACROGLOBIN, CPAMD5, DKFZp779B086, FWP007, H-2 Class I Histocompatibility Antigen Alpha-Chain, Mam, MGC114358, S863-7, α2M	alpha-2-macroglobulin	NM_012488	-1.44949
CLDN1	AI596271, Claudin, CLAUDIN 1, CLD1, ILVASC, SEMP1, UNQ481/PRO944	claudin 1	NM_031699	-1.44986
GCGR	FLJ97182, GGR, Glucagon Receptor, GR, MGC138246, MGC93090, RP23-82I5.18-002	glucagon receptor	NM_172092	-1.48119
PRKAB1	1300015D22Rik, AMPK, AMPK BETA1, AU021155, E430008F22, HAMPKb, MGC17785	protein kinase, AMP-activated, beta 1 non-catalytic subunit	NM_031976	-1.49021
GPLD1	6330541J12Rik, AW546131, BOS 21856, GPIPLD, GPIPLDM, MGC22590, PHOSPHOINOSITOL-GLYCAN-SPECIFIC PHOSPHOLIPASE D, PIGPLD, PIGPLD1, RP23-123C5.1	glycosylphosphatidylinositol specific phospholipase D1	NM_001100512	-1.49526
PKLR	PK1, PKL, Pklg, PKR, PKRL, Pyruvate kinase, liver and rbc, R-PK	pyruvate kinase, liver and RBC	NM_012624	-1.51035
LDLR	BOS 7602, FH, FHC, Hlb301, LDLCQ2, LDLRA	low density lipoprotein receptor	NM_175762	-1.52329
CD320	425O18-1, 8D6, 8D6A, D17Ertd716e, LOC688345, NG29, RGD1305860, TCBLR, UNQ198/PRO224, VLDL	CD320 molecule	NM_001014201	-1.53127
APBB3	FE65L2, MGC150555, MGC38710, MGC87674, Rirl2, SRA, TR2S	amyloid beta (A4) precursor protein-binding, family B, member 3	NM_053957	-1.55521
EGF	AI790464, BOS 6424, EGF-1, HB-EGF, HOMG4, URG	epidermal growth factor	NM_012842	-1.59008
CYP4V2	AU043077, AW111961, BCD, CYP4AH1, Cyp4v3, FLJ18432, Loc266761, MGC43534, UNQ2560	cytochrome P450, family 4, subfamily V, polypeptide 2	NM_001135600	-1.61462
FADS2	2900042M13Rik, D6D, DES6, Fadsd2, FADSD6, LLCDL2, MGC93365, SLL0262, TU13	fatty acid desaturase 2	NM_031344	-1.63628
CDK10	BC017131, MGC112847, PISSLRE	cyclin-dependent kinase 10	NM_001109936	-1.66764
ADAMTS7	ADAMTS7B, COMPase, DKFZp434H204	ADAM metallopeptidase with thrombospondin type 1 motif, 7	NM_001047101	-1.67024
VEGFA	BOS 21465, eVEGF120, eVEGF164, Gd-vegf, MGC70609, MVCD1, RP1-261G23.1, VEGF, Vegf-3, VEGF120, Vegfa 188, VPF	vascular endothelial growth factor A	NM_031836	-1.69704
ITGA5	CD49e, FNRA, Integrin α5, Itga5 retired, VLA5, VLA5A	integrin, alpha 5 (fibronectin receptor, alpha polypeptide)	NM_001108118	-1.74449	6
P2RY2	HP2U, MGC20088, MGC40010, P2RU1, P2U, P2U1, P2UR, P2Y2, P2Y2R	purinergic receptor P2Y, G-protein coupled, 2	NM_017255	-1.78082
MET	AI838057, AUTS9, c-Met, HGF, HGF Binding, HGFR, LOC360378, PAR4, RCCP2	met proto-oncogene (hepatocyte growth factor receptor)	NM_031517	-1.79034
INHBA	Activin A, Activin beta A, BETA A INHIBIN, Beta-A, EDF, FRP, Inhibin A, INHIBIN BETA A	inhibin, beta A	NM_017128	-2.06779
PLG	Ab1-346, AI649309, BOS 9997, DKFZp779M0222, GLU-PG, LPA, Pg, PG2, RP1-81D8.1, Scdp	plasminogen	NM_053491	-2.18756
GDNF	Activity-dependent neurotrophic factor, AI385739, ATF1, ATF2, Glial cell derived neurotrophic factor, HFB1-GDNF, HSCR3	glial cell derived neurotrophic factor	NM_019139	-2.31048
GRIA2	GluA2, GluR-K2, GLUR2, GLURB, HBGR2	glutamate receptor, ionotropic, AMPA 2	NM_017261	-43.915
